# Supplementary material for: Physiological dynamics of chemosynthetic symbionts in hydrothermal vent snails
Source: ISME J. 2020 Jul 2;14(10):2568–79. doi: 10.1038/s41396-020-0707-2 (PMC7490688; doi:10.1038/s41396-020-0707-2)
Supplement: Supplementary file 3 — Table S8 [file 41396_2020_707_MOESM3_ESM.xlsx]

## Sheet: Table S8 Caption
Full results table for the differential expression analyses in the sulfide and hydrogen treated symbonts of A. kojimai, A. strummeri and A. boucheti.
The individual tabs show summary statistics and annotations for each transcript in the respective treatment.

## Sheet: A_kojimai_Sulfide
FeatureID	baseMean	log2FoldChange	lfcSE	stat	pvalue	padj	Category	Subcategory	Subsystem	Function
fig|6666666.293769.peg.2344	286.102	-1.31245	0.18243	-7.19425	6.28051e-13	5.03639e-10	Amino Acids and Derivatives	Proline and 4-hydroxyproline	Proline Synthesis	NADP-specific glutamate dehydrogenase (EC 1.4.1.4)
fig|6666666.293769.peg.753	75.5126	2.19225	0.337877	6.48832	8.67979e-11	1.61789e-08	Amino Acids and Derivatives	Aromatic amino acids and derivatives	Tryptophan synthesis	Para-aminobenzoate synthase, aminase component (EC 2.6.1.85)
fig|6666666.293769.peg.3065	145.078	1.60904	0.288789	5.5717	2.52265e-08	6.86781e-07	Amino Acids and Derivatives	Lysine, threonine, methionine, and cysteine	Cysteine Biosynthesis	Sulfate permease
fig|6666666.293769.peg.1019	249.09	1.23151	0.223285	5.51542	3.47952e-08	8.89289e-07	Amino Acids and Derivatives	Lysine, threonine, methionine, and cysteine	Lysine Biosynthesis DAP Pathway	Aspartokinase (EC 2.7.2.4)
fig|6666666.293769.peg.2105	245.416	2.57441	0.482428	5.33637	9.48244e-08	1.8555e-06	Amino Acids and Derivatives	Arginine; urea cycle, polyamines	Arginine Biosynthesis -- gjo	Acetylornithine aminotransferase (EC 2.6.1.11)
fig|6666666.293769.peg.2879	205.666	1.96928	0.401227	4.90815	9.19403e-07	1.06611e-05	Amino Acids and Derivatives	- none -	- none -	Oxygen-insensitive NAD(P)H nitroreductase (EC 1.-.-.-) / Dihydropteridine reductase (EC 1.5.1.34)
fig|6666666.293769.peg.57	120.1	2.35919	0.481602	4.89863	9.65092e-07	1.11565e-05	Amino Acids and Derivatives	- none -	- none -	N-succinyl-L,L-diaminopimelate aminotransferase (EC 2.6.1.17), type 2
fig|6666666.293769.peg.3081	163.495	1.07353	0.229425	4.67924	2.87936e-06	2.6977e-05	Amino Acids and Derivatives	Arginine; urea cycle, polyamines	Arginine Biosynthesis -- gjo	Argininosuccinate synthase (EC 6.3.4.5)
fig|6666666.293769.peg.625	405.37	0.750458	0.162778	4.61032	4.02053e-06	3.55415e-05	Amino Acids and Derivatives	Arginine; urea cycle, polyamines	Arginine Biosynthesis -- gjo	N-acetylglutamate synthase (EC 2.3.1.1)
fig|6666666.293769.peg.1995	324.735	2.27995	0.524128	4.35	1.3614e-05	9.62965e-05	Amino Acids and Derivatives	- none -	- none -	5-methyltetrahydrofolate--homocysteine methyltransferase (EC 2.1.1.13)
fig|6666666.293769.peg.1180	190.465	1.32887	0.30551	4.34968	1.36338e-05	9.62965e-05	Amino Acids and Derivatives	- none -	- none -	D-alanine--D-alanine ligase (EC 6.3.2.4)
fig|6666666.293769.peg.427	52.2087	1.52335	0.351542	4.33335	1.46859e-05	0.000101987	Amino Acids and Derivatives	Alanine, serine, and glycine	Alanine biosynthesis	Ferredoxin, 2Fe-2S
fig|6666666.293769.peg.204	315.083	0.875923	0.205139	4.2699	1.95564e-05	0.000129354	Amino Acids and Derivatives	Histidine Metabolism	Histidine Biosynthesis	ATP phosphoribosyltransferase regulatory subunit (EC 2.4.2.17)
fig|6666666.293769.peg.2345	118.412	-1.19739	0.283716	-4.22037	2.43905e-05	0.000156374	Amino Acids and Derivatives	Proline and 4-hydroxyproline	Proline Synthesis	NADP-specific glutamate dehydrogenase (EC 1.4.1.4)
fig|6666666.293769.peg.1971	231.342	0.862591	0.205537	4.19678	2.70741e-05	0.000172111	Amino Acids and Derivatives	- none -	- none -	ATP phosphoribosyltransferase (EC 2.4.2.17) => HisGs
fig|6666666.293769.peg.726	277.418	-0.609056	0.147014	-4.14283	3.43039e-05	0.000212673	Amino Acids and Derivatives	Lysine, threonine, methionine, and cysteine	Cysteine Biosynthesis	Cysteine synthase B (EC 2.5.1.47)
fig|6666666.293769.peg.478	292.387	1.22214	0.295247	4.13937	3.48257e-05	0.000214844	Amino Acids and Derivatives	Alanine, serine, and glycine	Glycine and Serine Utilization	Serine hydroxymethyltransferase (EC 2.1.2.1)
fig|6666666.293769.peg.580	1918.09	-1.67463	0.426861	-3.92314	8.74022e-05	0.000458618	Amino Acids and Derivatives	- none -	- none -	Cysteine desulfurase (EC 2.8.1.7) => IscS
fig|6666666.293769.peg.571	866.63	-0.829187	0.212403	-3.90383	9.46817e-05	0.000492004	Amino Acids and Derivatives	Arginine; urea cycle, polyamines	Arginine Biosynthesis -- gjo	N-acetyl-gamma-glutamyl-phosphate reductase (EC 1.2.1.38)
fig|6666666.293769.peg.3061	159.119	-0.752913	0.193742	-3.88616	0.000101844	0.000519877	Amino Acids and Derivatives	- none -	- none -	Tryptophan synthase (indole-salvaging) (EC 4.2.1.122)
fig|6666666.293769.peg.2296	672.087	-0.978806	0.254725	-3.84259	0.000121742	0.000607414	Amino Acids and Derivatives	Lysine, threonine, methionine, and cysteine	Threonine and Homoserine Biosynthesis	Aspartate aminotransferase (EC 2.6.1.1)
fig|6666666.293769.peg.235	48.5732	1.42383	0.386096	3.68778	0.00022622	0.00101786	Amino Acids and Derivatives	- none -	- none -	Catalase KatE (EC 1.11.1.6)
fig|6666666.293769.peg.52	196.199	0.766741	0.208138	3.6838	0.000229779	0.00103263	Amino Acids and Derivatives	Lysine, threonine, methionine, and cysteine	Lysine Biosynthesis DAP Pathway	N-succinyl-L,L-diaminopimelate desuccinylase (EC 3.5.1.18)
fig|6666666.293769.peg.2104	205.752	1.80901	0.49299	3.66946	0.000243068	0.00108504	Amino Acids and Derivatives	Arginine; urea cycle, polyamines	Arginine Biosynthesis -- gjo	Ornithine carbamoyltransferase (EC 2.1.3.3)
fig|6666666.293769.peg.1054	189.446	-0.951366	0.261827	-3.63357	0.000279523	0.00121408	Amino Acids and Derivatives	- none -	- none -	Aspartate carbamoyltransferase (EC 2.1.3.2)
fig|6666666.293769.peg.482	24.1477	2.4053	0.680632	3.53393	0.000409436	0.00163644	Amino Acids and Derivatives	- none -	- none -	Lysine 2,3-aminomutase (EC 5.4.3.2)
fig|6666666.293769.peg.664	552.853	-0.551105	0.158123	-3.48529	0.000491612	0.00190804	Amino Acids and Derivatives	Histidine Metabolism	Histidine Biosynthesis	Phosphoribosyl-ATP pyrophosphatase (EC 3.6.1.31)
fig|6666666.293769.peg.579	1404.45	-1.59083	0.466691	-3.40874	0.000652641	0.0024229	Amino Acids and Derivatives	Alanine, serine, and glycine	Alanine biosynthesis	Iron-sulfur cluster regulator IscR
fig|6666666.293769.peg.2830	61.5874	1.15389	0.34213	3.37268	0.000744401	0.00273117	Amino Acids and Derivatives	Glutamine, glutamate, aspartate, asparagine; ammonia assimilation	Glutamine, Glutamate, Aspartate and Asparagine Biosynthesis	Glutamate synthase [NADPH] large chain (EC 1.4.1.13)
fig|6666666.293769.peg.399	61.3053	1.61923	0.489746	3.30625	0.00094552	0.00337352	Amino Acids and Derivatives	Aromatic amino acids and derivatives	Phenylalanine and Tyrosine Branches from Chorismate	Cyclohexadienyl dehydrogenase (EC 1.3.1.12)(EC 1.3.1.43)
fig|6666666.293769.peg.1489	942.65	-0.520256	0.161118	-3.22904	0.00124205	0.00420395	Amino Acids and Derivatives	Alanine, serine, and glycine	Glycine cleavage system	Sodium/glycine symporter GlyP
fig|6666666.293769.peg.1812	29.0486	1.54834	0.484244	3.19744	0.00138653	0.00460582	Amino Acids and Derivatives	Histidine Metabolism	Histidine Biosynthesis	Histidinol-phosphatase (EC 3.1.3.15)
fig|6666666.293769.peg.584	951.769	-1.31168	0.410419	-3.19596	0.00139368	0.00462466	Amino Acids and Derivatives	Alanine, serine, and glycine	Alanine biosynthesis	Chaperone protein HscA
fig|6666666.293769.peg.2617	35.0903	1.83554	0.583145	3.14765	0.00164586	0.00534258	Amino Acids and Derivatives	- none -	- none -	Diaminopimelate decarboxylase and/or diaminopimelate epimerase leader peptide
fig|6666666.293769.peg.1969	343.306	0.607067	0.192953	3.14619	0.00165413	0.00535739	Amino Acids and Derivatives	Histidine Metabolism	Histidine Biosynthesis	Histidinol-phosphate aminotransferase (EC 2.6.1.9)
fig|6666666.293769.peg.1728	395.92	0.811138	0.262001	3.09593	0.00196194	0.00618373	Amino Acids and Derivatives	- none -	- none -	Ketol-acid reductoisomerase (NADP(+)) (EC 1.1.1.86)
fig|6666666.293769.peg.2622	142.419	1.35195	0.436982	3.09382	0.00197595	0.00621747	Amino Acids and Derivatives	Alanine, serine, and glycine	Glycine and Serine Utilization	Aminomethyltransferase (glycine cleavage system T protein) (EC 2.1.2.10)
fig|6666666.293769.peg.985	157.284	1.14589	0.37479	3.05743	0.00223247	0.00688056	Amino Acids and Derivatives	Arginine; urea cycle, polyamines	Arginine Biosynthesis -- gjo	Acetylglutamate kinase (EC 2.7.2.8)
fig|6666666.293769.peg.1086	836.446	-0.555736	0.185977	-2.98819	0.00280631	0.00841402	Amino Acids and Derivatives	Lysine, threonine, methionine, and cysteine	Lysine Biosynthesis DAP Pathway	4-hydroxy-tetrahydrodipicolinate synthase (EC 4.3.3.7)
fig|6666666.293769.peg.661	422.215	-0.523532	0.175213	-2.98797	0.00280841	0.00841402	Amino Acids and Derivatives	Aromatic amino acids and derivatives	Chorismate: Intermediate for synthesis of Tryptophan, PAPA antibiotics, PABA, 3-hydroxyanthranilate and more.	Phosphoribosylformimino-5-aminoimidazole carboxamide ribotide isomerase (EC 5.3.1.16)
fig|6666666.293769.peg.403	235.262	1.24616	0.418601	2.97697	0.00291117	0.00870109	Amino Acids and Derivatives	Alanine, serine, and glycine	Glycine and Serine Utilization	Phosphoserine aminotransferase (EC 2.6.1.52)
fig|6666666.293769.peg.3208	373.185	0.609914	0.212138	2.87508	0.00403924	0.0114273	Amino Acids and Derivatives	- none -	- none -	S-adenosylmethionine synthetase (EC 2.5.1.6)
fig|6666666.293769.peg.449	202.453	1.20275	0.424057	2.83629	0.00456412	0.0127395	Amino Acids and Derivatives	Aromatic amino acids and derivatives	Common Pathway For Synthesis of Aromatic Compounds (DAHP synthase to chorismate)	3-dehydroquinate dehydratase II (EC 4.2.1.10)
fig|6666666.293769.peg.1118	227.816	0.558085	0.19756	2.82489	0.00472966	0.0130753	Amino Acids and Derivatives	Alanine, serine, and glycine	Glycine and Serine Utilization	Seryl-tRNA synthetase (EC 6.1.1.11)
fig|6666666.293769.peg.2543	568.377	0.593702	0.211091	2.81254	0.00491513	0.0135382	Amino Acids and Derivatives	Lysine, threonine, methionine, and cysteine	Cysteine Biosynthesis	Sulfate permease
fig|6666666.293769.peg.56	107.513	1.29545	0.496835	2.60741	0.00912313	0.0226242	Amino Acids and Derivatives	Lysine, threonine, methionine, and cysteine	Lysine Biosynthesis DAP Pathway	2,3,4,5-tetrahydropyridine-2,6-dicarboxylate N-succinyltransferase (EC 2.3.1.117)
fig|6666666.293769.peg.2229	85.3917	-0.620522	0.244719	-2.53565	0.0112239	0.0270534	Amino Acids and Derivatives	Branched-chain amino acids	Leucine Biosynthesis	2-isopropylmalate synthase (EC 2.3.3.13)
fig|6666666.293769.peg.2244	94.0885	0.813054	0.322675	2.51973	0.0117445	0.0281403	Amino Acids and Derivatives	Alanine, serine, and glycine	Glycine and Serine Utilization	Glycine cleavage system H protein
fig|6666666.293769.peg.662	505.169	-0.351678	0.140868	-2.4965	0.0125424	0.0297674	Amino Acids and Derivatives	- none -	- none -	Imidazole glycerol phosphate synthase cyclase subunit HisF
fig|6666666.293769.peg.2579	894.397	-0.569747	0.230212	-2.47487	0.0133283	0.0312965	Amino Acids and Derivatives	- none -	- none -	Adenosylhomocysteinase (EC 3.3.1.1)
fig|6666666.293769.peg.1232	65.055	0.84073	0.346851	2.42389	0.0153552	0.0351795	Amino Acids and Derivatives	- none -	- none -	5&#39;-methylthioadenosine phosphorylase (EC 2.4.2.28)
fig|6666666.293769.peg.309	184.944	0.898853	0.372611	2.41231	0.0158519	0.0360505	Amino Acids and Derivatives	Aromatic amino acids and derivatives	Tryptophan synthesis	Tryptophan synthase alpha chain (EC 4.2.1.20)
fig|6666666.293769.peg.1088	45.1719	0.946175	0.398883	2.37206	0.0176893	0.0394182	Amino Acids and Derivatives	Alanine, serine, and glycine	Glycine cleavage system	Glycine cleavage system transcriptional antiactivator GcvR
fig|6666666.293769.peg.311	279.472	0.479754	0.20468	2.34392	0.0190824	0.0418764	Amino Acids and Derivatives	Aromatic amino acids and derivatives	Tryptophan synthesis	Phosphoribosylanthranilate isomerase (EC 5.3.1.24)
fig|6666666.293769.peg.581	783.411	-0.718436	0.313633	-2.29069	0.0219815	0.04703	Amino Acids and Derivatives	Alanine, serine, and glycine	Alanine biosynthesis	Iron-sulfur cluster assembly scaffold protein IscU
fig|6666666.293769.peg.1601	421.051	0.521927	0.22933	2.27588	0.0228534	0.0486185	Amino Acids and Derivatives	Aromatic amino acids and derivatives	Tryptophan synthesis	Anthranilate synthase, aminase component (EC 4.1.3.27)
fig|6666666.293769.peg.2232	23.6166	0.732266	0.32932	2.22357	0.0261776	0.0542766	Amino Acids and Derivatives	Alanine, serine, and glycine	Glycine and Serine Utilization	Phosphoserine phosphatase (EC 3.1.3.3)
fig|6666666.293769.peg.1344	55.1893	0.841018	0.381938	2.20197	0.0276671	0.0568007	Amino Acids and Derivatives	- none -	- none -	pyridoxal phosphate-dependent deaminase, putative
fig|6666666.293769.peg.2416	9.42223	1.49376	0.678929	2.20017	0.0277945	0.057	Amino Acids and Derivatives	Alanine, serine, and glycine	Alanine biosynthesis	Cysteine desulfurase (EC 2.8.1.7)
fig|6666666.293769.peg.401	277.807	0.618121	0.28189	2.19278	0.0283234	0.0579581	Amino Acids and Derivatives	Aromatic amino acids and derivatives	Phenylalanine and Tyrosine Branches from Chorismate	Prephenate dehydratase (EC 4.2.1.51)
fig|6666666.293769.peg.2978	324.904	-0.355631	0.164353	-2.16382	0.0304781	0.061662	Amino Acids and Derivatives	- none -	- none -	O-acetylhomoserine sulfhydrylase (EC 2.5.1.49) / O-succinylhomoserine sulfhydrylase (EC 2.5.1.48)
fig|6666666.293769.peg.400	172.906	1.09166	0.505211	2.1608	0.0307111	0.0620665	Amino Acids and Derivatives	Aromatic amino acids and derivatives	Phenylalanine and Tyrosine Branches from Chorismate	Biosynthetic Aromatic amino acid aminotransferase beta (EC 2.6.1.57)
fig|6666666.293769.peg.1970	355.224	0.686896	0.319138	2.15235	0.03137	0.063059	Amino Acids and Derivatives	Histidine Metabolism	Histidine Biosynthesis	Histidinol dehydrogenase (EC 1.1.1.23)
fig|6666666.293769.peg.2985	85.471	0.468025	0.218743	2.13961	0.0323863	0.064859	Amino Acids and Derivatives	Aromatic amino acids and derivatives	Common Pathway For Synthesis of Aromatic Compounds (DAHP synthase to chorismate)	Shikimate kinase I (EC 2.7.1.71)
fig|6666666.293769.peg.2616	72.2996	0.961242	0.477524	2.01297	0.0441177	0.0835434	Amino Acids and Derivatives	Lysine, threonine, methionine, and cysteine	Lysine Biosynthesis DAP Pathway	Diaminopimelate decarboxylase (EC 4.1.1.20)
fig|6666666.293769.peg.1757	148.985	-0.735928	0.368765	-1.99566	0.0459715	0.0864349	Amino Acids and Derivatives	Lysine, threonine, methionine, and cysteine	Cysteine Biosynthesis	Cys regulon transcriptional activator CysB
fig|6666666.293769.peg.171	524.033	0.435894	0.21933	1.98739	0.0468789	0.0874933	Amino Acids and Derivatives	Lysine, threonine, methionine, and cysteine	Threonine and Homoserine Biosynthesis	Homoserine dehydrogenase (EC 1.1.1.3)
fig|6666666.293769.peg.2107	49.026	1.03395	0.520611	1.98602	0.0470307	0.0876896	Amino Acids and Derivatives	Lysine, threonine, methionine, and cysteine	Threonine and Homoserine Biosynthesis	Homoserine kinase (EC 2.7.1.39)
fig|6666666.293769.peg.1614	170.947	0.414436	0.209123	1.98178	0.0475039	0.0883963	Amino Acids and Derivatives	Arginine; urea cycle, polyamines	Arginine Biosynthesis -- gjo	N-acetylglutamate synthase (EC 2.3.1.1)
fig|6666666.293769.peg.2099	326.343	-0.295963	0.149418	-1.98077	0.0476166	0.0885621	Amino Acids and Derivatives	Amino Acids and Derivatives - no subcategory	Creatine and Creatinine Degradation	N-methylhydantoinase B (EC 3.5.2.14)
fig|6666666.293769.peg.769	186.185	0.473791	0.243702	1.94415	0.0518778	0.0948904	Amino Acids and Derivatives	Lysine, threonine, methionine, and cysteine	Lysine Biosynthesis DAP Pathway	4-hydroxy-tetrahydrodipicolinate reductase (EC 1.17.1.8)
fig|6666666.293769.peg.1195	590.278	-0.272986	0.142176	-1.92006	0.0548502	0.0992637	Amino Acids and Derivatives	Proline and 4-hydroxyproline	Proline Synthesis	Gamma-glutamyl phosphate reductase (EC 1.2.1.41)
fig|6666666.293769.peg.1280	4.95138	1.8211	0.962119	1.8928	0.0583846	0.104503	Amino Acids and Derivatives	Lysine, threonine, methionine, and cysteine	Cysteine Biosynthesis	Sulfate permease, Trk-type
fig|6666666.293769.peg.2937	217.257	0.404354	0.213713	1.89204	0.0584851	0.104633	Amino Acids and Derivatives	Aromatic amino acids and derivatives	Common Pathway For Synthesis of Aromatic Compounds (DAHP synthase to chorismate)	2-keto-3-deoxy-D-arabino-heptulosonate-7-phosphate synthase I alpha (EC 2.5.1.54)
fig|6666666.293769.peg.1375	93.0848	0.726149	0.417477	1.73937	0.0819691	0.138861	Amino Acids and Derivatives	- none -	- none -	3-phosphoshikimate 1-carboxyvinyltransferase (EC 2.5.1.19)
fig|6666666.293769.peg.2243	175.516	0.451982	0.270904	1.66842	0.0952327	0.157132	Amino Acids and Derivatives	Alanine, serine, and glycine	Glycine and Serine Utilization	Glycine dehydrogenase [decarboxylating] (glycine cleavage system P1 protein) (EC 1.4.4.2)
fig|6666666.293769.peg.585	53.6806	-0.689672	0.413476	-1.66799	0.095318	0.157139	Amino Acids and Derivatives	Alanine, serine, and glycine	Alanine biosynthesis	Ferredoxin, 2Fe-2S
fig|6666666.293769.peg.2986	255.761	0.308515	0.185945	1.65917	0.0970818	0.159413	Amino Acids and Derivatives	Aromatic amino acids and derivatives	Common Pathway For Synthesis of Aromatic Compounds (DAHP synthase to chorismate)	3-dehydroquinate synthase (EC 4.2.3.4)
fig|6666666.293769.peg.1760	937.269	-0.565545	0.350832	-1.61201	0.106959	0.171656	Amino Acids and Derivatives	Branched-chain amino acids	Leucine Biosynthesis	3-isopropylmalate dehydrogenase (EC 1.1.1.85)
fig|6666666.293769.peg.1599	450.445	-0.28073	0.175231	-1.60206	0.109143	0.174415	Amino Acids and Derivatives	Aromatic amino acids and derivatives	Tryptophan synthesis	Anthranilate phosphoribosyltransferase (EC 2.4.2.18)
fig|6666666.293769.peg.170	157.167	0.433776	0.271074	1.60021	0.109552	0.174772	Amino Acids and Derivatives	- none -	- none -	Glutamate-pyruvate aminotransferase AlaC (EC 2.6.1.2)
fig|6666666.293769.peg.2346	342.107	-0.324458	0.205448	-1.57927	0.114275	0.181094	Amino Acids and Derivatives	Proline and 4-hydroxyproline	Proline Synthesis	NADP-specific glutamate dehydrogenase (EC 1.4.1.4)
fig|6666666.293769.peg.1308	1680.01	0.360318	0.232875	1.54726	0.1218	0.189883	Amino Acids and Derivatives	Glutamine, glutamate, aspartate, asparagine; ammonia assimilation	Glutamine, Glutamate, Aspartate and Asparagine Biosynthesis	Glutamate synthase [NADPH] large chain (EC 1.4.1.13)
fig|6666666.293769.peg.405	94.1988	0.753005	0.487231	1.54548	0.12223	0.190074	Amino Acids and Derivatives	- none -	- none -	Methylthioribose-1-phosphate isomerase (EC 5.3.1.23)
fig|6666666.293769.peg.331	322.958	0.333278	0.217354	1.53334	0.125191	0.194196	Amino Acids and Derivatives	Branched-chain amino acids	Leucine Biosynthesis	2-isopropylmalate synthase (EC 2.3.3.13)
fig|6666666.293769.peg.1471	88.2959	0.480773	0.315409	1.52429	0.127437	0.196625	Amino Acids and Derivatives	Lysine, threonine, methionine, and cysteine	Cysteine Biosynthesis	Adenylylsulfate kinase (EC 2.7.1.25)
fig|6666666.293769.peg.752	179.444	-0.446424	0.298733	-1.49439	0.135074	0.206205	Amino Acids and Derivatives	Aromatic amino acids and derivatives	Tryptophan synthesis	Aminodeoxychorismate lyase (EC 4.1.3.38)
fig|6666666.293769.peg.886	6.84621	1.43503	0.962882	1.49035	0.136132	0.207316	Amino Acids and Derivatives	- none -	- none -	Catalase KatE (EC 1.11.1.6)
fig|6666666.293769.peg.260	111.796	0.484083	0.331053	1.46225	0.143672	0.216228	Amino Acids and Derivatives	Glutamine, glutamate, aspartate, asparagine; ammonia assimilation	Glutamine, Glutamate, Aspartate and Asparagine Biosynthesis	Glutamate racemase (EC 5.1.1.3)
fig|6666666.293769.peg.2770	221.943	-0.304691	0.212299	-1.4352	0.15123	0.225353	Amino Acids and Derivatives	Glutamine, glutamate, aspartate, asparagine; ammonia assimilation	Glutamine, Glutamate, Aspartate and Asparagine Biosynthesis	Asparagine synthetase [glutamine-hydrolyzing] (EC 6.3.5.4)
fig|6666666.293769.peg.2842	5.47942	1.73783	1.21916	1.42544	0.154031	0.228915	Amino Acids and Derivatives	Alanine, serine, and glycine	Alanine biosynthesis	Cysteine desulfurase (EC 2.8.1.7), SufS subfamily
fig|6666666.293769.peg.1612	659.63	-0.210804	0.150749	-1.39837	0.162001	0.237988	Amino Acids and Derivatives	Branched-chain amino acids	Branched-Chain Amino Acid Biosynthesis	Dihydroxy-acid dehydratase (EC 4.2.1.9)
fig|6666666.293769.peg.601	496.719	-0.225812	0.163196	-1.38369	0.166455	0.243809	Amino Acids and Derivatives	Lysine, threonine, methionine, and cysteine	Lysine Biosynthesis DAP Pathway	Diaminopimelate epimerase (EC 5.1.1.7)
fig|6666666.293769.peg.1598	240.342	0.318558	0.238042	1.33824	0.180817	0.26118	Amino Acids and Derivatives	Aromatic amino acids and derivatives	Tryptophan synthesis	Indole-3-glycerol phosphate synthase (EC 4.1.1.48)
fig|6666666.293769.peg.241	289.338	-0.154709	0.136245	-1.13552	0.256156	0.349211	Amino Acids and Derivatives	Aromatic amino acids and derivatives	Common Pathway For Synthesis of Aromatic Compounds (DAHP synthase to chorismate)	Shikimate 5-dehydrogenase I alpha (EC 1.1.1.25)
fig|6666666.293769.peg.326	1513.23	-0.224345	0.202887	-1.10576	0.26883	0.361876	Amino Acids and Derivatives	Lysine, threonine, methionine, and cysteine	Cysteine Biosynthesis	Sulfate permease
fig|6666666.293769.peg.663	248.938	0.196528	0.18172	1.08148	0.279482	0.373537	Amino Acids and Derivatives	Histidine Metabolism	Histidine Biosynthesis	Phosphoribosyl-AMP cyclohydrolase (EC 3.5.4.19)
fig|6666666.293769.peg.660	170.612	0.205451	0.191299	1.07398	0.282832	0.376675	Amino Acids and Derivatives	Histidine Metabolism	Histidine Biosynthesis	Imidazole glycerol phosphate synthase amidotransferase subunit (EC 2.4.2.-)
fig|6666666.293769.peg.3664	7.33821	0.562103	0.573657	0.979859	0.327156	0.423982	Amino Acids and Derivatives	Lysine, threonine, methionine, and cysteine	Cysteine Biosynthesis	Sulfate permease, Trk-type
fig|6666666.293769.peg.2242	177.651	0.255718	0.266212	0.960582	0.336762	0.433293	Amino Acids and Derivatives	Alanine, serine, and glycine	Glycine and Serine Utilization	Glycine dehydrogenase [decarboxylating] (glycine cleavage system P2 protein) (EC 1.4.4.2)
fig|6666666.293769.peg.885	9.85299	0.69193	0.786001	0.880316	0.378688	0.477747	Amino Acids and Derivatives	- none -	- none -	Catalase KatE (EC 1.11.1.6)
fig|6666666.293769.peg.315	338.325	0.165818	0.188806	0.878245	0.379811	0.478682	Amino Acids and Derivatives	Aromatic amino acids and derivatives	Common Pathway For Synthesis of Aromatic Compounds (DAHP synthase to chorismate)	Chorismate synthase (EC 4.2.3.5)
fig|6666666.293769.peg.2261	285.129	0.139765	0.162266	0.861336	0.389053	0.488506	Amino Acids and Derivatives	Arginine; urea cycle, polyamines	Arginine Biosynthesis -- gjo	Argininosuccinate lyase (EC 4.3.2.1)
fig|6666666.293769.peg.2275	792.663	-0.564202	0.670594	-0.841346	0.400154	0.499793	Amino Acids and Derivatives	- none -	- none -	5-methyltetrahydropteroyltriglutamate--homocysteine methyltransferase (EC 2.1.1.14)
fig|6666666.293769.peg.1758	406.535	0.407192	0.499569	0.815086	0.415023	0.515281	Amino Acids and Derivatives	Branched-chain amino acids	Leucine Biosynthesis	3-isopropylmalate dehydratase large subunit (EC 4.2.1.33)
fig|6666666.293769.peg.2390	164.051	-0.165597	0.205568	-0.805555	0.420499	0.52019	Amino Acids and Derivatives	Amino Acids and Derivatives - no subcategory	Creatine and Creatinine Degradation	N-methylhydantoinase A (EC 3.5.2.14)
fig|6666666.293769.peg.659	142.282	-0.191103	0.244657	-0.781105	0.434741	0.535103	Amino Acids and Derivatives	Histidine Metabolism	Histidine Biosynthesis	Imidazoleglycerol-phosphate dehydratase (EC 4.2.1.19)
fig|6666666.293769.peg.1559	375.552	-0.356883	0.457671	-0.77978	0.43552	0.53548	Amino Acids and Derivatives	Proline and 4-hydroxyproline	Proline Synthesis	Pyrroline-5-carboxylate reductase (EC 1.5.1.2)
fig|6666666.293769.peg.3062	42.8656	0.360704	0.465898	0.774212	0.438805	0.538755	Amino Acids and Derivatives	Aromatic amino acids and derivatives	Tryptophan synthesis	Tryptophan synthase beta chain (EC 4.2.1.20)
fig|6666666.293769.peg.176	149.836	0.188589	0.267058	0.70617	0.480082	0.578656	Amino Acids and Derivatives	Lysine, threonine, methionine, and cysteine	Threonine and Homoserine Biosynthesis	Threonine synthase (EC 4.2.3.1)
fig|6666666.293769.peg.1600	333.622	0.217887	0.316998	0.687343	0.491867	0.589268	Amino Acids and Derivatives	Aromatic amino acids and derivatives	Tryptophan synthesis	Para-aminobenzoate synthase, amidotransferase component (EC 2.6.1.85)
fig|6666666.293769.peg.402	314.943	0.230341	0.344426	0.668769	0.503643	0.600503	Amino Acids and Derivatives	Alanine, serine, and glycine	Glycine and Serine Utilization	D-3-phosphoglycerate dehydrogenase (EC 1.1.1.95)
fig|6666666.293769.peg.1723	158.251	0.122743	0.194478	0.631139	0.527949	0.623744	Amino Acids and Derivatives	Proline and 4-hydroxyproline	Proline Synthesis	Glutamate 5-kinase (EC 2.7.2.11)
fig|6666666.293769.peg.839	754.025	0.225785	0.363978	0.620325	0.535044	0.629355	Amino Acids and Derivatives	Lysine, threonine, methionine, and cysteine	Cysteine Biosynthesis	Sulfate transporter, CysZ-type
fig|6666666.293769.peg.55	89.2595	0.207732	0.352509	0.589297	0.555662	0.648733	Amino Acids and Derivatives	- none -	A Glutathione-dependent Thiol Reductase Associated with a Step in Lysine Biosynthesis	FIG138056: a glutathione-dependent thiol reductase
fig|6666666.293769.peg.1402	37.3761	-0.289835	0.495816	-0.584562	0.558842	0.651434	Amino Acids and Derivatives	Lysine, threonine, methionine, and cysteine	Cysteine Biosynthesis	Adenylylsulfate kinase (EC 2.7.1.25)
fig|6666666.293769.peg.1294	200.838	0.160906	0.295627	0.544287	0.586244	0.677489	Amino Acids and Derivatives	Alanine, serine, and glycine	Glycine cleavage system	Glycine cleavage system transcriptional antiactivator GcvR
fig|6666666.293769.peg.310	614.207	-0.0699225	0.133386	-0.52421	0.600132	0.688969	Amino Acids and Derivatives	Aromatic amino acids and derivatives	Tryptophan synthesis	Tryptophan synthase beta chain (EC 4.2.1.20)
fig|6666666.293769.peg.1311	253.454	0.0818674	0.16247	0.503892	0.614337	0.700475	Amino Acids and Derivatives	Branched-chain amino acids	Branched-Chain Amino Acid Biosynthesis	Threonine dehydratase biosynthetic (EC 4.3.1.19)
fig|6666666.293769.peg.1567	285.195	0.11099	0.222131	0.49966	0.617314	0.702612	Amino Acids and Derivatives	- none -	- none -	Glutamine--fructose-6-phosphate aminotransferase [isomerizing] (EC 2.6.1.16)
fig|6666666.293769.peg.578	250.887	-0.113905	0.249074	-0.457316	0.647444	0.728496	Amino Acids and Derivatives	Lysine, threonine, methionine, and cysteine	Cysteine Biosynthesis	Serine acetyltransferase (EC 2.3.1.30)
fig|6666666.293769.peg.248	1611.79	0.0975232	0.239843	0.406613	0.684292	0.759609	Amino Acids and Derivatives	Glutamine, glutamate, aspartate, asparagine; ammonia assimilation	Glutamine synthetases	Glutamine synthetase type I (EC 6.3.1.2)
fig|6666666.293769.peg.3063	16.3436	-0.242461	0.66145	-0.366559	0.713948	0.784069	Amino Acids and Derivatives	Aromatic amino acids and derivatives	Tryptophan synthesis	Tryptophan synthase beta chain (EC 4.2.1.20)
fig|6666666.293769.peg.1759	164.69	0.131875	0.450294	0.292863	0.769627	0.830172	Amino Acids and Derivatives	Branched-chain amino acids	Leucine Biosynthesis	3-isopropylmalate dehydratase small subunit (EC 4.2.1.33)
fig|6666666.293769.peg.3232	83.3471	-0.0679817	0.23905	-0.284383	0.776117	0.835015	Amino Acids and Derivatives	Lysine, threonine, methionine, and cysteine	Threonine and Homoserine Biosynthesis	Aspartate aminotransferase (EC 2.6.1.1)
fig|6666666.293769.peg.3026	261.79	-0.0477875	0.245677	-0.194513	0.845774	0.889827	Amino Acids and Derivatives	- none -	- none -	N(6)-L-threonylcarbamoyladenine synthase (EC 2.3.1.234)
fig|6666666.293769.peg.1761	325.318	-0.0599581	0.421797	-0.142149	0.886962	0.92308	Amino Acids and Derivatives	Lysine, threonine, methionine, and cysteine	Lysine Biosynthesis DAP Pathway	Aspartate-semialdehyde dehydrogenase (EC 1.2.1.11)
fig|6666666.293769.peg.1309	593.143	-0.0299537	0.220551	-0.135813	0.891969	0.92675	Amino Acids and Derivatives	Glutamine, glutamate, aspartate, asparagine; ammonia assimilation	Glutamine, Glutamate, Aspartate and Asparagine Biosynthesis	Glutamate synthase [NADPH] small chain (EC 1.4.1.13)
fig|6666666.293769.peg.1788	45.7383	-0.0382995	0.287468	-0.13323	0.894011	0.928358	Amino Acids and Derivatives	Glutamine, glutamate, aspartate, asparagine; ammonia assimilation	Glutamine, Glutamate, Aspartate and Asparagine Biosynthesis	Glutamate synthase [NADPH] large chain (EC 1.4.1.13)
fig|6666666.293769.peg.3645	14.9397	-0.0548085	0.526598	-0.10408	0.917106	0.945321	Amino Acids and Derivatives	Branched-chain amino acids	Leucine Biosynthesis	2-isopropylmalate synthase (EC 2.3.3.13)
fig|6666666.293769.peg.3644	62.1739	-0.0269011	0.358825	-0.0749701	0.940239	0.959532	Amino Acids and Derivatives	Branched-chain amino acids	Leucine Biosynthesis	2-isopropylmalate synthase (EC 2.3.3.13)
fig|6666666.293769.peg.420	545.759	1.20361	0.18568	6.48214	9.04332e-11	1.61789e-08	Carbon Metabolism	Central carbohydrate metabolism	Pentose phosphate pathway	Ribose-phosphate pyrophosphokinase (EC 2.7.6.1)
fig|6666666.293769.peg.1170	362.488	-1.27224	0.199338	-6.38233	1.74418e-10	2.25962e-08	Carbon Metabolism	Monosaccharides	Deoxyribose and Deoxynucleoside Catabolism	Putative deoxyribonuclease YjjV
fig|6666666.293769.peg.3040	1769.43	-1.05397	0.212557	-4.9585	7.10394e-07	8.65574e-06	Carbon Metabolism	Central carbohydrate metabolism	Glycolate, glyoxylate interconversions	Phosphoglycolate phosphatase (EC 3.1.3.18)
fig|6666666.293769.peg.2176	1400.6	-0.87905	0.184052	-4.7761	1.78725e-06	1.83964e-05	Carbon Metabolism	- none -	- none -	Phosphoribulokinase (EC 2.7.1.19)
fig|6666666.293769.peg.915	169.597	1.44851	0.305816	4.73655	2.17383e-06	2.1549e-05	Carbon Metabolism	- none -	- none -	Glycosyltransferase
fig|6666666.293769.peg.920	557.254	0.941614	0.200918	4.68657	2.77826e-06	2.6292e-05	Carbon Metabolism	- none -	- none -	GDP-mannose 4,6-dehydratase (EC 4.2.1.47)
fig|6666666.293769.peg.903	247.5	1.29322	0.284125	4.55159	5.32408e-06	4.45491e-05	Carbon Metabolism	Central carbohydrate metabolism	Pyruvate Alanine Serine Interconversions	Branched-chain amino acid aminotransferase (EC 2.6.1.42)
fig|6666666.293769.peg.2467	967.328	-1.4389	0.320716	-4.48652	7.23955e-06	5.78702e-05	Carbon Metabolism	Monosaccharides	Deoxyribose and Deoxynucleoside Catabolism	Purine nucleoside phosphorylase (EC 2.4.2.1)
fig|6666666.293769.peg.1683	604.917	-0.75247	0.181706	-4.14115	3.45569e-05	0.000213888	Carbon Metabolism	- none -	- none -	Cryptic sugar kinase Mak
fig|6666666.293769.peg.1943	55.299	1.87747	0.454757	4.12852	3.65113e-05	0.000223409	Carbon Metabolism	- none -	- none -	Phosphoglucomutase (EC 5.4.2.2)
fig|6666666.293769.peg.2220	137.341	1.25855	0.323346	3.89227	9.9309e-05	0.000511803	Carbon Metabolism	Central carbohydrate metabolism	Pyruvate metabolism I: anaplerotic reactions, PEP	Phosphoenolpyruvate carboxylase (EC 4.1.1.31)
fig|6666666.293769.peg.137	431.821	1.32405	0.347163	3.81392	0.000136778	0.000669108	Carbon Metabolism	Central carbohydrate metabolism	Glycolysis and Gluconeogenesis	Triosephosphate isomerase (EC 5.3.1.1)
fig|6666666.293769.peg.524	291.765	0.712524	0.190896	3.73252	0.000189573	0.00088917	Carbon Metabolism	- none -	- none -	UDP-N-acetylglucosamine 4,6-dehydratase (EC 4.2.1.135)
fig|6666666.293769.peg.377	762.528	0.558084	0.15264	3.6562	0.000255978	0.00112877	Carbon Metabolism	Central carbohydrate metabolism	Glycolysis and Gluconeogenesis	Phosphoglycerate kinase (EC 2.7.2.3)
fig|6666666.293769.peg.787	34.7333	2.16312	0.606711	3.56533	0.000363404	0.00148403	Carbon Metabolism	CO2 fixation	CO2 uptake, carboxysome	Rubisco activation protein CbbQ
fig|6666666.293769.peg.1968	1455.06	-0.745368	0.210617	-3.53898	0.000401683	0.00160887	Carbon Metabolism	Organic acids	Glycerate metabolism	Pyruvate kinase (EC 2.7.1.40)
fig|6666666.293769.peg.851	1303.23	-0.734302	0.20865	-3.51929	0.000432696	0.00171435	Carbon Metabolism	Polysaccharides	Glycogen metabolism	1,4-alpha-glucan (glycogen) branching enzyme, GH-13-type (EC 2.4.1.18)
fig|6666666.293769.peg.1593	132.248	1.21329	0.347229	3.49419	0.000475501	0.00185125	Carbon Metabolism	- none -	- none -	Glycosyltransferase
fig|6666666.293769.peg.842	94.2557	1.1379	0.348084	3.26904	0.00107914	0.00377497	Carbon Metabolism	- none -	- none -	Carbohydrate kinase, FGGY family
fig|6666666.293769.peg.426	118.552	1.23071	0.377033	3.2642	0.00109775	0.00382584	Carbon Metabolism	Central carbohydrate metabolism	Glycolate, glyoxylate interconversions	Glycolate dehydrogenase (EC 1.1.99.14), iron-sulfur subunit GlcF
fig|6666666.293769.peg.855	91.4648	1.07388	0.32959	3.25822	0.00112115	0.00389293	Carbon Metabolism	Central carbohydrate metabolism	Glycolysis and Gluconeogenesis	Pyruvate,phosphate dikinase (EC 2.7.9.1)
fig|6666666.293769.peg.519	339.144	0.813693	0.250648	3.24636	0.00116891	0.00402159	Carbon Metabolism	- none -	- none -	GDP-mannose 4,6-dehydratase (EC 4.2.1.47)
fig|6666666.293769.peg.2996	368.956	0.612	0.201425	3.03836	0.00237873	0.00726577	Carbon Metabolism	Central carbohydrate metabolism	Glycolysis and Gluconeogenesis	Glucose-6-phosphate isomerase (EC 5.3.1.9)
fig|6666666.293769.peg.3376	297.034	-0.859821	0.283778	-3.02991	0.00244627	0.00745389	Carbon Metabolism	- none -	- none -	Aconitate hydratase 2 (EC 4.2.1.3)
fig|6666666.293769.peg.1358	742.257	-0.734291	0.252444	-2.90873	0.00362901	0.0104959	Carbon Metabolism	Central carbohydrate metabolism	Pyruvate metabolism II: acetyl-CoA, acetogenesis from pyruvate	Dihydrolipoamide acetyltransferase component of pyruvate dehydrogenase complex (EC 2.3.1.12)
fig|6666666.293769.peg.1300	60.9415	0.852632	0.294709	2.89314	0.00381417	0.0109472	Carbon Metabolism	- none -	- none -	Sugar fermentation stimulation protein SfsA
fig|6666666.293769.peg.1103	684.811	0.98757	0.353946	2.79017	0.00526799	0.0143178	Carbon Metabolism	Central carbohydrate metabolism	Glycolysis and Gluconeogenesis	Pyrophosphate-dependent fructose 6-phosphate-1-kinase (EC 2.7.1.90)
fig|6666666.293769.peg.707	544.321	-0.551142	0.200071	-2.75474	0.00587396	0.0156403	Carbon Metabolism	Organic acids	Glycerate metabolism	Pyruvate kinase (EC 2.7.1.40)
fig|6666666.293769.peg.2245	105.732	0.889383	0.32311	2.75258	0.00591286	0.0157216	Carbon Metabolism	- none -	- none -	Aconitate hydratase 2 (EC 4.2.1.3)
fig|6666666.293769.peg.269	622.075	0.41208	0.15007	2.74592	0.00603408	0.0159986	Carbon Metabolism	- none -	- none -	2,3-bisphosphoglycerate-independent phosphoglycerate mutase (EC 5.4.2.12)
fig|6666666.293769.peg.856	122.517	0.850536	0.311718	2.72855	0.0063614	0.0166805	Carbon Metabolism	Central carbohydrate metabolism	Glycolysis and Gluconeogenesis	Pyruvate,phosphate dikinase (EC 2.7.9.1)
fig|6666666.293769.peg.1357	1109.43	-0.772921	0.288266	-2.68128	0.00733418	0.0187701	Carbon Metabolism	Central carbohydrate metabolism	Pyruvate metabolism II: acetyl-CoA, acetogenesis from pyruvate	Dihydrolipoamide dehydrogenase of pyruvate dehydrogenase complex (EC 1.8.1.4)
fig|6666666.293769.peg.1613	60.995	0.641431	0.239599	2.6771	0.00742614	0.0189538	Carbon Metabolism	Central carbohydrate metabolism	Pyruvate metabolism II: acetyl-CoA, acetogenesis from pyruvate	Acetate permease ActP (cation/acetate symporter)
fig|6666666.293769.peg.2020	17.6645	1.72173	0.65052	2.64669	0.00812833	0.0204954	Carbon Metabolism	- none -	- none -	Phosphotransferase system, phosphocarrier protein HPr
fig|6666666.293769.peg.2122	227.279	0.936144	0.374675	2.49855	0.0124704	0.0296152	Carbon Metabolism	Polysaccharides	Glycogen metabolism	Glycogen phosphorylase (EC 2.4.1.1)
fig|6666666.293769.peg.509	212.89	0.614842	0.250907	2.45048	0.0142665	0.0331679	Carbon Metabolism	- none -	- none -	Fe-S protein, homolog of lactate dehydrogenase SO1521
fig|6666666.293769.peg.1115	329.083	0.711114	0.291258	2.44152	0.0146254	0.0338557	Carbon Metabolism	Organic acids	Glycerate metabolism	Glycerate kinase (EC 2.7.1.31)
fig|6666666.293769.peg.854	446.365	0.549506	0.228459	2.40527	0.0161607	0.0365978	Carbon Metabolism	Polysaccharides	Glycogen metabolism	4-alpha-glucanotransferase (amylomaltase) (EC 2.4.1.25)
fig|6666666.293769.peg.823	376.917	-0.325674	0.137648	-2.36599	0.0179821	0.0399047	Carbon Metabolism	- none -	- none -	ADP-heptose synthase (EC 2.7.-.-) / D-glycero-beta-D-manno-heptose 7-phosphate kinase
fig|6666666.293769.peg.786	150.541	0.771197	0.329258	2.34222	0.0191692	0.0420179	Carbon Metabolism	CO2 fixation	CO2 uptake, carboxysome	Rubisco activation protein CbbO
fig|6666666.293769.peg.2143	402.062	-0.561404	0.243566	-2.30494	0.02117	0.0455792	Carbon Metabolism	- none -	- none -	Fumarate hydratase class I, aerobic (EC 4.2.1.2)
fig|6666666.293769.peg.3944	34.2894	1.24237	0.544663	2.28099	0.0225491	0.0480255	Carbon Metabolism	Central carbohydrate metabolism	Pentose phosphate pathway	6-phosphogluconate dehydrogenase, decarboxylating (EC 1.1.1.44)
fig|6666666.293769.peg.3457	226.213	0.523064	0.232745	2.24738	0.024616	0.0514363	Carbon Metabolism	Monosaccharides	D-ribose utilization	Ribose 5-phosphate isomerase A (EC 5.3.1.6)
fig|6666666.293769.peg.1359	1294.25	-0.541849	0.257922	-2.10083	0.0356562	0.0704496	Carbon Metabolism	Central carbohydrate metabolism	Pyruvate metabolism II: acetyl-CoA, acetogenesis from pyruvate	Pyruvate dehydrogenase E1 component (EC 1.2.4.1)
fig|6666666.293769.peg.2135	164.989	-0.437436	0.210916	-2.07398	0.0380812	0.0746657	Carbon Metabolism	One-carbon Metabolism	One-carbon metabolism by tetrahydropterines	Methenyltetrahydrofolate cyclohydrolase (EC 3.5.4.9)
fig|6666666.293769.peg.2468	276.392	0.544748	0.269555	2.02092	0.0432883	0.0824299	Carbon Metabolism	Monosaccharides	Deoxyribose and Deoxynucleoside Catabolism	Purine nucleoside phosphorylase (EC 2.4.2.1)
fig|6666666.293769.peg.895	277.674	0.542282	0.272477	1.99019	0.0465696	0.0870458	Carbon Metabolism	- none -	- none -	Glycosyl transferase in large core OS assembly cluster
fig|6666666.293769.peg.3039	916.306	-0.423047	0.215016	-1.96752	0.0491235	0.0908319	Carbon Metabolism	Central carbohydrate metabolism	Pentose phosphate pathway	Ribulose-phosphate 3-epimerase (EC 5.1.3.1)
fig|6666666.293769.peg.378	1234.99	0.512259	0.260479	1.96661	0.0492287	0.090975	Carbon Metabolism	Central carbohydrate metabolism	Glycolysis and Gluconeogenesis	NAD-dependent glyceraldehyde-3-phosphate dehydrogenase (EC 1.2.1.12)
fig|6666666.293769.peg.850	760.537	-0.429439	0.220803	-1.9449	0.0517876	0.094864	Carbon Metabolism	Polysaccharides	Glycogen metabolism	Glycogen synthase, ADP-glucose transglucosylase (EC 2.4.1.21)
fig|6666666.293769.peg.1729	260.447	0.311603	0.161008	1.93532	0.0529509	0.096394	Carbon Metabolism	Fermentation	Acetolactate synthase subunits	Acetolactate synthase small subunit (EC 2.2.1.6)
fig|6666666.293769.peg.3231	92.0497	0.366443	0.197385	1.85649	0.0633843	0.111838	Carbon Metabolism	- none -	- none -	Xylulose-1,5-bisphosphate phosphatase CbbY, converts this Rubisco inhibiting byproduct to xylulose-5P
fig|6666666.293769.peg.2463	349.522	0.561683	0.32386	1.73434	0.0828583	0.140035	Carbon Metabolism	Monosaccharides	Deoxyribose and Deoxynucleoside Catabolism	Na+ dependent nucleoside transporter NupC
fig|6666666.293769.peg.1878	115.449	0.495957	0.297724	1.66583	0.0957474	0.157566	Carbon Metabolism	Central carbohydrate metabolism	Methylglyoxal Metabolism	Hydroxyacylglutathione hydrolase (EC 3.1.2.6)
fig|6666666.293769.peg.554	193.984	0.541907	0.32743	1.65503	0.097918	0.160419	Carbon Metabolism	- none -	- none -	Inositol-1-monophosphatase (EC 3.1.3.25)
fig|6666666.293769.peg.883	158.816	-0.563389	0.343442	-1.64042	0.100918	0.163585	Carbon Metabolism	Central carbohydrate metabolism	Pyruvate Alanine Serine Interconversions	L-alanine:glyoxylate aminotransferase (EC 2.6.1.44)
fig|6666666.293769.peg.437	74.1152	-0.437543	0.269264	-1.62496	0.104171	0.16761	Carbon Metabolism	- none -	- none -	UTP--glucose-1-phosphate uridylyltransferase (EC 2.7.7.9)
fig|6666666.293769.peg.375	1176.32	0.230818	0.14629	1.57781	0.11461	0.181148	Carbon Metabolism	Organic acids	Glycerate metabolism	Pyruvate kinase (EC 2.7.1.40)
fig|6666666.293769.peg.921	445.652	0.456943	0.291671	1.56664	0.1172	0.18408	Carbon Metabolism	- none -	- none -	glycosyl transferase, group 1 family protein
fig|6666666.293769.peg.257	66.7111	0.455229	0.299527	1.51983	0.128554	0.198105	Carbon Metabolism	Central carbohydrate metabolism	Glycolate, glyoxylate interconversions	Glycolate dehydrogenase (EC 1.1.99.14), iron-sulfur subunit GlcF
fig|6666666.293769.peg.397	9.7172	1.14212	0.781141	1.46211	0.14371	0.216228	Carbon Metabolism	- none -	- none -	Inositol-1-monophosphatase (EC 3.1.3.25)
fig|6666666.293769.peg.984	455.924	-0.645708	0.442475	-1.45931	0.14448	0.217211	Carbon Metabolism	Monosaccharides	Mannose Metabolism	Phosphomannomutase (EC 5.4.2.8)
fig|6666666.293769.peg.788	789.805	0.599007	0.417414	1.43504	0.151275	0.225353	Carbon Metabolism	CO2 fixation	CO2 uptake, carboxysome	Ribulose bisphosphate carboxylase (EC 4.1.1.39)
fig|6666666.293769.peg.1890	41.6236	0.446439	0.314469	1.41966	0.155707	0.230857	Carbon Metabolism	Central carbohydrate metabolism	Pyruvate Alanine Serine Interconversions	Alanine dehydrogenase (EC 1.4.1.1)
fig|6666666.293769.peg.374	1273.79	0.29622	0.215255	1.37614	0.16878	0.246446	Carbon Metabolism	Central carbohydrate metabolism	Glycolysis and Gluconeogenesis	Fructose-bisphosphate aldolase class II (EC 4.1.2.13)
fig|6666666.293769.peg.791	205.404	0.31018	0.225603	1.37489	0.169164	0.246801	Carbon Metabolism	Monosaccharides	Mannose Metabolism	Phosphomannomutase (EC 5.4.2.8)
fig|6666666.293769.peg.2881	59.6604	0.396362	0.296345	1.3375	0.181059	0.261429	Carbon Metabolism	- none -	- none -	Sugar kinase
fig|6666666.293769.peg.1684	156.02	-0.329309	0.261096	-1.26126	0.207215	0.293666	Carbon Metabolism	- none -	- none -	Cryptic sugar kinase Mak
fig|6666666.293769.peg.2886	117.785	-0.350049	0.278463	-1.25707	0.208727	0.295251	Carbon Metabolism	Central carbohydrate metabolism	Glycolysis and Gluconeogenesis	Pyruvate,phosphate dikinase (EC 2.7.9.1)
fig|6666666.293769.peg.1730	621.794	0.256452	0.206555	1.24157	0.214396	0.302246	Carbon Metabolism	Fermentation	Acetolactate synthase subunits	Acetolactate synthase large subunit (EC 2.2.1.6)
fig|6666666.293769.peg.852	622.881	-0.237622	0.201742	-1.17785	0.238855	0.329919	Carbon Metabolism	Polysaccharides	Glycogen metabolism	Glucose-1-phosphate adenylyltransferase (EC 2.7.7.27)
fig|6666666.293769.peg.2595	104.402	0.265074	0.2355	1.12558	0.260344	0.353109	Carbon Metabolism	- none -	- none -	Aldose 1-epimerase family protein YeaD
fig|6666666.293769.peg.3437	76.8176	0.43868	0.3928	1.1168	0.264079	0.357024	Carbon Metabolism	- none -	- none -	Glycosyltransferase (EC 2.4.1.-) in large core OS assembly cluster
fig|6666666.293769.peg.853	688.754	-0.212131	0.190359	-1.11438	0.265117	0.358161	Carbon Metabolism	- none -	- none -	Amylopullulanase
fig|6666666.293769.peg.1594	551.84	0.329084	0.307639	1.06971	0.284751	0.378693	Carbon Metabolism	- none -	- none -	Glycosyltransferase
fig|6666666.293769.peg.2962	183.831	0.27525	0.264596	1.04026	0.298218	0.393125	Carbon Metabolism	- none -	- none -	Acetyl-CoA synthetase (EC 6.2.1.1)
fig|6666666.293769.peg.1299	75.0634	-0.246825	0.240267	-1.02729	0.304283	0.399486	Carbon Metabolism	Central carbohydrate metabolism	Pyruvate Alanine Serine Interconversions	Valine--pyruvate aminotransferase (EC 2.6.1.66)
fig|6666666.293769.peg.83	301.771	0.331574	0.32279	1.02721	0.30432	0.399486	Carbon Metabolism	Central carbohydrate metabolism	Glycolysis and Gluconeogenesis	Enolase (EC 4.2.1.11)
fig|6666666.293769.peg.2883	4.8292	0.838289	0.87092	0.962533	0.335782	0.432749	Carbon Metabolism	Central carbohydrate metabolism	Glycolysis and Gluconeogenesis	Pyruvate,phosphate dikinase (EC 2.7.9.1)
fig|6666666.293769.peg.1802	52.4289	0.265629	0.276049	0.962255	0.335922	0.432749	Carbon Metabolism	Central carbohydrate metabolism	Pyruvate Alanine Serine Interconversions	D-alanine aminotransferase (EC 2.6.1.21)
fig|6666666.293769.peg.143	173.626	0.182874	0.201166	0.909072	0.363312	0.461136	Carbon Metabolism	- none -	- none -	Methionyl-tRNA formyltransferase (EC 2.1.2.9)
fig|6666666.293769.peg.1983	186.614	0.236828	0.283328	0.835879	0.403223	0.503124	Carbon Metabolism	Central carbohydrate metabolism	Pyruvate metabolism I: anaplerotic reactions, PEP	NADP-dependent malic enzyme (EC 1.1.1.40)
fig|6666666.293769.peg.943	248.793	0.164866	0.221831	0.743206	0.457357	0.555901	Carbon Metabolism	Central carbohydrate metabolism	Glycolysis and Gluconeogenesis	Glucokinase (EC 2.7.1.2)
fig|6666666.293769.peg.3223	10.1313	-0.344547	0.510441	-0.674999	0.499677	0.596532	Carbon Metabolism	Polysaccharides	Glycogen metabolism	Glycogen phosphorylase (EC 2.4.1.1)
fig|6666666.293769.peg.2885	10.1214	-0.523422	0.802688	-0.652087	0.514345	0.610551	Carbon Metabolism	Central carbohydrate metabolism	Glycolysis and Gluconeogenesis	Pyruvate,phosphate dikinase (EC 2.7.9.1)
fig|6666666.293769.peg.1018	204.007	-0.175535	0.284626	-0.616721	0.537419	0.631358	Carbon Metabolism	Carbohydrates - no subcategory	Carbon storage regulator	Carbon storage regulator
fig|6666666.293769.peg.3357	14.1807	-0.313519	0.570476	-0.549574	0.582611	0.673706	Carbon Metabolism	Central carbohydrate metabolism	Glycolysis and Gluconeogenesis	Glucose-6-phosphate isomerase (EC 5.3.1.9)
fig|6666666.293769.peg.1313	174.124	0.124994	0.24306	0.514249	0.607078	0.693984	Carbon Metabolism	One-carbon Metabolism	One-carbon metabolism by tetrahydropterines	5-formyltetrahydrofolate cyclo-ligase (EC 6.3.3.2)
fig|6666666.293769.peg.1889	23.2541	-0.321253	0.654332	-0.490964	0.623452	0.708288	Carbon Metabolism	Central carbohydrate metabolism	Pyruvate Alanine Serine Interconversions	Alanine dehydrogenase (EC 1.4.1.1)
fig|6666666.293769.peg.3078	22.5779	-0.268493	0.561264	-0.478373	0.632385	0.715193	Carbon Metabolism	Polysaccharides	Glycogen metabolism	Glycogen phosphorylase (EC 2.4.1.1)
fig|6666666.293769.peg.2466	1281.04	-0.0643925	0.135102	-0.47662	0.633632	0.715957	Carbon Metabolism	Monosaccharides	Deoxyribose and Deoxynucleoside Catabolism	Phosphopentomutase (EC 5.4.2.7)
fig|6666666.293769.peg.2234	484.836	0.0950803	0.225524	0.421597	0.673319	0.751258	Carbon Metabolism	- none -	- none -	Phosphoenolpyruvate-protein phosphotransferase of PTS system (EC 2.7.3.9)
fig|6666666.293769.peg.255	267.962	-0.0908191	0.222783	-0.407657	0.683526	0.759316	Carbon Metabolism	Central carbohydrate metabolism	Glycolate, glyoxylate interconversions	Glycolate dehydrogenase (EC 1.1.99.14), subunit GlcD
fig|6666666.293769.peg.379	3087.28	-0.0645832	0.159827	-0.404083	0.686152	0.76081	Carbon Metabolism	Central carbohydrate metabolism	Pentose phosphate pathway	Transketolase (EC 2.2.1.1)
fig|6666666.293769.peg.256	70.6837	0.126003	0.317881	0.396384	0.691822	0.765318	Carbon Metabolism	Central carbohydrate metabolism	Glycolate, glyoxylate interconversions	Glycolate dehydrogenase (EC 1.1.99.14), FAD-binding subunit GlcE
fig|6666666.293769.peg.789	50.4623	-0.123947	0.316054	-0.392171	0.694932	0.767674	Carbon Metabolism	CO2 fixation	CO2 uptake, carboxysome	RuBisCO operon transcriptional regulator CbbR
fig|6666666.293769.peg.3358	11.4557	0.273479	0.799561	0.342037	0.732323	0.798878	Carbon Metabolism	Central carbohydrate metabolism	Glycolysis and Gluconeogenesis	Glucose-6-phosphate isomerase (EC 5.3.1.9)
fig|6666666.293769.peg.1833	322.471	-0.0643601	0.198907	-0.323569	0.746265	0.810089	Carbon Metabolism	Central carbohydrate metabolism	Pyruvate Alanine Serine Interconversions	Alanine racemase (EC 5.1.1.1)
fig|6666666.293769.peg.2464	461.383	0.0902321	0.279508	0.322825	0.746828	0.810466	Carbon Metabolism	Monosaccharides	Deoxyribose and Deoxynucleoside Catabolism	Deoxyribose-phosphate aldolase (EC 4.1.2.4)
fig|6666666.293769.peg.525	172.845	-0.0844587	0.264479	-0.31934	0.749469	0.811925	Carbon Metabolism	- none -	- none -	GDP-L-fucose synthetase (EC 1.1.1.271)
fig|6666666.293769.peg.1630	817.958	-0.0705914	0.232635	-0.303443	0.761552	0.822872	Carbon Metabolism	- none -	- none -	Glyceraldehyde-3-phosphate: ferredoxin oxidoreductase (EC 1.2.7.6)
fig|6666666.293769.peg.2517	24.9465	0.234011	0.819789	0.285453	0.775297	0.834372	Carbon Metabolism	Central carbohydrate metabolism	Glycolysis and Gluconeogenesis	Glucose-6-phosphate isomerase (EC 5.3.1.9)
fig|6666666.293769.peg.1137	151.342	-0.0566498	0.208456	-0.271759	0.785807	0.843244	Carbon Metabolism	- none -	- none -	Glycosyl transferase, family 2
fig|6666666.293769.peg.2884	19.63	0.104725	0.426894	0.245319	0.80621	0.858306	Carbon Metabolism	Central carbohydrate metabolism	Glycolysis and Gluconeogenesis	Pyruvate,phosphate dikinase (EC 2.7.9.1)
fig|6666666.293769.peg.790	308.013	0.0418042	0.194586	0.214837	0.829894	0.879276	Carbon Metabolism	Monosaccharides	Mannose Metabolism	Mannose-6-phosphate isomerase (EC 5.3.1.8)
fig|6666666.293769.peg.215	27.884	0.0704786	0.347622	0.202745	0.839334	0.885532	Carbon Metabolism	- none -	- none -	Ketohexokinase (EC 2.7.1.3)
fig|6666666.293769.peg.2860	31.0887	-0.119019	0.729099	-0.163242	0.870328	0.91056	Carbon Metabolism	Central carbohydrate metabolism	Pyruvate metabolism II: acetyl-CoA, acetogenesis from pyruvate	Acetate kinase (EC 2.7.2.1)
fig|6666666.293769.peg.2580	279.665	-0.04097	0.252078	-0.162529	0.870889	0.910792	Carbon Metabolism	One-carbon Metabolism	One-carbon metabolism by tetrahydropterines	5,10-methylenetetrahydrofolate reductase (EC 1.5.1.20)
fig|6666666.293769.peg.1753	71.6643	-0.0556782	0.458	-0.121568	0.903241	0.936132	Carbon Metabolism	Central carbohydrate metabolism	Glycolysis and Gluconeogenesis	NAD-dependent glyceraldehyde-3-phosphate dehydrogenase (EC 1.2.1.12)
fig|6666666.293769.peg.280	92.4467	1.63104	0.274527	5.94126	2.82837e-09	1.56267e-07	Cell cycle	- none -	CBSS-176299.4.peg.1292; <br>Glycyl-tRNA synthetase containing cluster	GTP-binding protein Era
fig|6666666.293769.peg.422	82.1529	1.56286	0.384951	4.05989	4.9096e-05	0.000281096	Cell cycle	Dormancy and Sporulation - no subcategory	Sporulation-associated proteins with broader functions	Peptidyl-tRNA hydrolase (EC 3.1.1.29)
fig|6666666.293769.peg.161	276.359	-1.02287	0.289662	-3.53127	0.000413575	0.00164947	Cell cycle	- none -	- none -	GTP-binding protein EngB
fig|6666666.293769.peg.1181	167.082	1.22637	0.350135	3.50258	0.00046078	0.0018014	Cell cycle	- none -	- none -	Cell division protein FtsQ
fig|6666666.293769.peg.1215	420.797	0.932519	0.283201	3.29278	0.000992026	0.00350286	Cell cycle	- none -	Septum site-determining cluster Min	Septum site-determining protein MinC
fig|6666666.293769.peg.1217	87.9885	1.59107	0.546989	2.90878	0.00362841	0.0104959	Cell cycle	- none -	Septum site-determining cluster Min	Cell division topological specificity factor MinE
fig|6666666.293769.peg.1092	155.264	1.10882	0.403232	2.74984	0.00596248	0.0158423	Cell cycle	- none -	CBSS-211586.9.peg.2729	Intracellular septation protein IspA
fig|6666666.293769.peg.2136	441.888	1.04975	0.435944	2.40799	0.0160404	0.0364132	Cell cycle	- none -	- none -	Cell division trigger factor (EC 5.2.1.8)
fig|6666666.293769.peg.1581	158.127	0.496109	0.231782	2.14041	0.0323217	0.0647985	Cell cycle	- none -	- none -	Segregation and condensation protein B
fig|6666666.293769.peg.3685	56.1718	0.63115	0.298174	2.11672	0.0342837	0.0681501	Cell cycle	- none -	- none -	Septum-associated rare lipoprotein A
fig|6666666.293769.peg.1315	155.939	0.500019	0.238023	2.10072	0.0356655	0.0704496	Cell cycle	- none -	- none -	Z-ring-associated protein ZapA
fig|6666666.293769.peg.552	805.545	0.568703	0.275259	2.06607	0.038822	0.0758868	Cell cycle	- none -	- none -	Cell division protein MraZ
fig|6666666.293769.peg.2280	354.199	0.57666	0.281979	2.04505	0.0408501	0.0789763	Cell cycle	- none -	- none -	Cell division protein ZapD
fig|6666666.293769.peg.550	366.362	0.735244	0.380419	1.93272	0.0532704	0.0968717	Cell cycle	- none -	Stationary phase repair cluster	Cell division protein FtsL
fig|6666666.293769.peg.835	56.1384	0.723348	0.377986	1.91369	0.0556599	0.100247	Cell cycle	- none -	Stationary phase repair cluster	FIG139438: lipoprotein B
fig|6666666.293769.peg.1530	165.132	0.318039	0.17863	1.78043	0.075005	0.128556	Cell cycle	- none -	- none -	Cell-division-associated, ABC-transporter-like signaling protein FtsX
fig|6666666.293769.peg.1183	462.061	-0.328306	0.216845	-1.51401	0.130024	0.199795	Cell cycle	- none -	- none -	Cell division protein FtsZ
fig|6666666.293769.peg.2272	4261.77	-0.424236	0.296616	-1.43025	0.152644	0.227032	Cell cycle	- none -	- none -	Cell division protein FtsH
fig|6666666.293769.peg.1531	63.8173	0.592279	0.428492	1.38224	0.166898	0.244268	Cell cycle	- none -	- none -	Cell-division-associated, ABC-transporter-like signaling protein FtsE
fig|6666666.293769.peg.1216	438.852	0.387282	0.285904	1.35459	0.175548	0.254058	Cell cycle	- none -	Septum site-determining cluster Min	Septum site-determining protein MinD
fig|6666666.293769.peg.1560	84.1447	0.661928	0.57789	1.14542	0.252034	0.344826	Cell cycle	- none -	- none -	Cell division integral membrane protein, YggT and half-length relatives
fig|6666666.293769.peg.1182	410.875	0.298313	0.276697	1.07812	0.28098	0.375139	Cell cycle	- none -	- none -	Cell division protein FtsA
fig|6666666.293769.peg.3902	263.721	-0.231812	0.231793	-1.00008	0.31727	0.413596	Cell cycle	- none -	- none -	Septum formation protein Maf
fig|6666666.293769.peg.1854	195.22	0.322794	0.338464	0.953702	0.340235	0.43725	Cell cycle	- none -	- none -	Cell division protein BolA
fig|6666666.293769.peg.1097	501.153	-0.178676	0.19528	-0.914973	0.360206	0.457967	Cell cycle	- none -	- none -	Segregation and condensation protein A
fig|6666666.293769.peg.2508	71.9133	0.386482	0.500529	0.772148	0.440027	0.539699	Cell cycle	- none -	- none -	Cell division protein FtsK
fig|6666666.293769.peg.549	1559.82	0.13787	0.192416	0.716522	0.473669	0.572027	Cell cycle	- none -	CBSS-83331.1.peg.3039	Cell division protein FtsI [Peptidoglycan synthetase] (EC 2.4.1.129)
fig|6666666.293769.peg.544	529.693	0.00435182	0.162532	0.0267752	0.978639	0.985723	Cell cycle	- none -	- none -	Cell division protein FtsW
fig|6666666.293769.peg.514	232.107	1.93051	0.322468	5.98668	2.14167e-09	1.29778e-07	Cell Wall and Capsule	- none -	- none -	LppC putative lipoprotein
fig|6666666.293769.peg.2674	104.412	2.79279	0.476342	5.86299	4.54616e-09	2.16202e-07	Cell Wall and Capsule	- none -	- none -	Rod shape-determining protein MreC
fig|6666666.293769.peg.522	152.705	1.19181	0.205308	5.80497	6.43762e-09	2.71754e-07	Cell Wall and Capsule	Capsular and extracellular polysacchrides	Rhamnose containing glycans	UDP-glucose 4-epimerase (EC 5.1.3.2)
fig|6666666.293769.peg.2193	279.478	2.00279	0.354422	5.65086	1.59643e-08	5.08286e-07	Cell Wall and Capsule	- none -	- none -	Peptidoglycan D,D-transpeptidase MrdA (EC 3.4.16.4)
fig|6666666.293769.peg.566	148.778	1.18163	0.21061	5.61052	2.01724e-08	5.95259e-07	Cell Wall and Capsule	- none -	- none -	Anhydro-N-acetylmuramic acid kinase (EC 2.7.1.170)
fig|6666666.293769.peg.1257	115.708	1.27246	0.236119	5.38905	7.08309e-08	1.49501e-06	Cell Wall and Capsule	- none -	- none -	Lipid A export permease/ATP-binding protein MsbA
fig|6666666.293769.peg.3469	7727.22	-1.82444	0.344519	-5.29561	1.18622e-07	2.18555e-06	Cell Wall and Capsule	- none -	- none -	UDP-3-O-[3-hydroxymyristoyl] N-acetylglucosamine deacetylase (EC 3.5.1.108)
fig|6666666.293769.peg.1291	165.42	1.41528	0.274272	5.16015	2.46754e-07	3.6355e-06	Cell Wall and Capsule	- none -	- none -	Outer membrane beta-barrel assembly protein BamD
fig|6666666.293769.peg.1912	124.569	1.55084	0.318592	4.8678	1.12845e-06	1.23964e-05	Cell Wall and Capsule	- none -	- none -	Transglycosylase, Slt family
fig|6666666.293769.peg.1306	91.2396	1.71081	0.357804	4.78142	1.74057e-06	1.80644e-05	Cell Wall and Capsule	- none -	- none -	Uncharacterized membrane protein, YraQ family
fig|6666666.293769.peg.1691	234.045	1.50214	0.318159	4.72133	2.34302e-06	2.2746e-05	Cell Wall and Capsule	- none -	- none -	Membrane protein insertion efficiency factor YidD
fig|6666666.293769.peg.523	167.196	0.999254	0.219191	4.55882	5.14409e-06	4.37248e-05	Cell Wall and Capsule	- none -	- none -	Undecaprenyl-phosphate alpha-N-acetylglucosaminyl 1-phosphate transferase (EC 2.7.8.33)
fig|6666666.293769.peg.72	253.777	0.886081	0.202335	4.37929	1.19067e-05	8.66928e-05	Cell Wall and Capsule	- none -	- none -	UDP-3-O-[3-hydroxymyristoyl] glucosamine N-acyltransferase (EC 2.3.1.191)
fig|6666666.293769.peg.1286	29.4092	2.79307	0.674537	4.14072	3.4621e-05	0.000213933	Cell Wall and Capsule	- none -	- none -	Undecaprenyl-diphosphatase (EC 3.6.1.27)
fig|6666666.293769.peg.899	171.355	1.42815	0.348785	4.09464	4.22826e-05	0.000252553	Cell Wall and Capsule	- none -	- none -	UDP-glucose:(heptosyl) LPS alpha1,3-glucosyltransferase WaaG
fig|6666666.293769.peg.75	175.395	1.23344	0.303729	4.06097	4.8869e-05	0.000280601	Cell Wall and Capsule	- none -	- none -	Lipid-A-disaccharide synthase (EC 2.4.1.182)
fig|6666666.293769.peg.1370	248.252	0.969151	0.240103	4.0364	5.4277e-05	0.000304811	Cell Wall and Capsule	- none -	- none -	Lipopolysaccharide assembly protein LapB
fig|6666666.293769.peg.1675	125.925	1.71933	0.429491	4.00319	6.24939e-05	0.000345279	Cell Wall and Capsule	- none -	- none -	2-polyprenylphenol hydroxylase and related flavodoxin oxidoreductases / CDP-6-deoxy-delta-3,4-glucoseen reductase-like
fig|6666666.293769.peg.305	211.601	1.21535	0.305495	3.97831	6.9407e-05	0.000375197	Cell Wall and Capsule	- none -	- none -	Colicin V production protein
fig|6666666.293769.peg.270	161.612	1.16958	0.294428	3.97238	7.11593e-05	0.000383016	Cell Wall and Capsule	- none -	- none -	Murein hydrolase activator EnvC
fig|6666666.293769.peg.70	325.86	0.817362	0.206478	3.95858	7.5396e-05	0.000402934	Cell Wall and Capsule	- none -	- none -	Outer membrane protein assembly factor YaeT
fig|6666666.293769.peg.1123	60.7778	1.92918	0.493853	3.9064	9.36827e-05	0.000487488	Cell Wall and Capsule	- none -	- none -	Outer-membrane-phospholipid-binding lipoprotein MlaA
fig|6666666.293769.peg.2890	46.063	2.09014	0.535919	3.90011	9.61487e-05	0.000497563	Cell Wall and Capsule	- none -	- none -	UDP-2,3-diacylglucosamine diphosphatase (EC 3.6.1.54)
fig|6666666.293769.peg.900	89.7639	1.4751	0.390456	3.7779	0.000158159	0.000758882	Cell Wall and Capsule	- none -	- none -	Lipopolysaccharide core heptosyltransferase I
fig|6666666.293769.peg.1690	664.326	1.23753	0.329655	3.75401	0.000174025	0.000827608	Cell Wall and Capsule	- none -	- none -	Inner membrane protein translocase and chaperone YidC, long form
fig|6666666.293769.peg.546	1362.05	-0.590237	0.157502	-3.7475	0.000178606	0.000845659	Cell Wall and Capsule	- none -	- none -	Phospho-N-acetylmuramoyl-pentapeptide-transferase (EC 2.7.8.13)
fig|6666666.293769.peg.1618	53.5768	1.0244	0.277292	3.6943	0.000220494	0.00100048	Cell Wall and Capsule	Capsular and extracellular polysacchrides	Rhamnose containing glycans	dTDP-glucose 4,6-dehydratase (EC 4.2.1.46)
fig|6666666.293769.peg.1972	390.417	0.710135	0.192427	3.6904	0.000223898	0.00100861	Cell Wall and Capsule	Cell Wall and Capsule - no subcategory	UDP-N-acetylmuramate from Fructose-6-phosphate Biosynthesis	UDP-N-acetylglucosamine 1-carboxyvinyltransferase (EC 2.5.1.7)
fig|6666666.293769.peg.3129	91.0975	1.29837	0.357765	3.62912	0.000284393	0.00123237	Cell Wall and Capsule	Capsular and extracellular polysacchrides	Rhamnose containing glycans	Teichoic acid export ATP-binding protein TagH (EC 3.6.3.40)
fig|6666666.293769.peg.327	316.401	1.38783	0.382772	3.62574	0.000288137	0.00124716	Cell Wall and Capsule	- none -	- none -	Phosphoethanolamine transferase EptC
fig|6666666.293769.peg.901	140.797	1.26613	0.351605	3.601	0.000316992	0.00133364	Cell Wall and Capsule	- none -	- none -	ADP-heptose--lipooligosaccharide heptosyltransferase II
fig|6666666.293769.peg.545	459.432	0.801974	0.224804	3.56743	0.000360499	0.00147538	Cell Wall and Capsule	- none -	- none -	UDP-N-acetylmuramoylalanine--D-glutamate ligase (EC 6.3.2.9)
fig|6666666.293769.peg.1721	119.98	0.73617	0.21451	3.43187	0.000599438	0.00225209	Cell Wall and Capsule	Gram-Negative cell wall components	Peptidoglycan lipid II flippase	Proposed peptidoglycan lipid II flippase MurJ
fig|6666666.293769.peg.2676	978.412	0.449996	0.131606	3.41927	0.000627898	0.00234029	Cell Wall and Capsule	- none -	- none -	Rod shape-determining protein MreB
fig|6666666.293769.peg.1121	72.6954	1.09741	0.325542	3.37102	0.000748894	0.00274497	Cell Wall and Capsule	- none -	- none -	3-deoxy-D-manno-octulosonate 8-phosphate phosphatase (EC 3.1.3.45)
fig|6666666.293769.peg.692	358.774	1.01178	0.30304	3.33877	0.000841502	0.00304872	Cell Wall and Capsule	- none -	- none -	Putative membrane protein YfjD
fig|6666666.293769.peg.1750	46.5864	1.38738	0.418119	3.31815	0.000906158	0.00325161	Cell Wall and Capsule	- none -	- none -	Uncharacterized membrane protein, YraQ family
fig|6666666.293769.peg.2167	104.806	0.87889	0.265235	3.31363	0.000920936	0.00329383	Cell Wall and Capsule	Cell Wall and Capsule - no subcategory	Recycling of Peptidoglycan Amino Acids	AmpG permease
fig|6666666.293769.peg.1879	141.141	0.804277	0.243983	3.29644	0.000979188	0.0034673	Cell Wall and Capsule	- none -	- none -	Membrane-bound lytic murein transglycosylase D
fig|6666666.293769.peg.1205	30.7884	1.75883	0.533814	3.29484	0.000984764	0.00348377	Cell Wall and Capsule	- none -	- none -	Uncharacterized UPF0721 integral membrane protein
fig|6666666.293769.peg.1660	296.157	0.669601	0.207417	3.22828	0.00124537	0.00421137	Cell Wall and Capsule	Cell Wall and Capsule - no subcategory	Recycling of Peptidoglycan Amino Acids	UDP-N-acetylmuramate:L-alanyl-gamma-D-glutamyl-meso-diaminopimelate ligase (EC 6.3.2.-)
fig|6666666.293769.peg.45	268.088	-2.25096	0.703871	-3.19798	0.00138396	0.00460135	Cell Wall and Capsule	- none -	- none -	membrane-bound metal-dependent hydrolase
fig|6666666.293769.peg.1780	247.262	-0.670774	0.230629	-2.90846	0.00363217	0.010497	Cell Wall and Capsule	- none -	- none -	Prolipoprotein diacylglyceryl transferase
fig|6666666.293769.peg.1278	181.2	0.66453	0.23024	2.88625	0.00389863	0.0111216	Cell Wall and Capsule	- none -	- none -	Periplasmic chaperone and peptidyl-prolyl cis-trans isomerase of outer membrane proteins SurA (EC 5.2.1.8)
fig|6666666.293769.peg.3368	48.4978	1.1118	0.386173	2.87901	0.00398919	0.0113249	Cell Wall and Capsule	- none -	- none -	Lipopolysaccharide ABC transporter, ATP-binding protein LptB
fig|6666666.293769.peg.634	76.2599	1.42976	0.501322	2.85197	0.00434492	0.0122093	Cell Wall and Capsule	Miscellaneous - no subcategory	Broadly distributed proteins not in subsystems	FIG002473: Protein YcaR in KDO2-Lipid A biosynthesis cluster
fig|6666666.293769.peg.820	48.0381	1.25608	0.458916	2.73706	0.0061991	0.0163668	Cell Wall and Capsule	- none -	- none -	3-deoxy-D-manno-octulosonic acid transferase (EC 2.4.99.12)(EC 2.4.99.13)
fig|6666666.293769.peg.744	40.3295	1.67315	0.613205	2.72853	0.00636164	0.0166805	Cell Wall and Capsule	- none -	- none -	YihE protein, required for LPS synthesis
fig|6666666.293769.peg.1177	227.427	0.626535	0.232237	2.69783	0.00697929	0.0180587	Cell Wall and Capsule	- none -	- none -	UDP-N-acetylglucosamine--N-acetylmuramyl-(pentapeptide) pyrophosphoryl-undecaprenol N-acetylglucosamine transferase (EC 2.4.1.227)
fig|6666666.293769.peg.1926	132.06	0.919713	0.34146	2.69347	0.00707119	0.0182087	Cell Wall and Capsule	- none -	- none -	3-deoxy-manno-octulosonate cytidylyltransferase (EC 2.7.7.38)
fig|6666666.293769.peg.3284	24.7043	1.38375	0.514972	2.68705	0.00720871	0.0184868	Cell Wall and Capsule	- none -	- none -	Protein QmcA (possibly involved in integral membrane quality control)
fig|6666666.293769.peg.1212	503.871	0.553501	0.206787	2.67668	0.00743565	0.0189652	Cell Wall and Capsule	- none -	- none -	Phosphatidylglycerol--membrane-oligosaccharide glycerophosphotransferase (EC 2.7.8.20)
fig|6666666.293769.peg.2194	253.117	0.892592	0.334502	2.66842	0.00762092	0.019372	Cell Wall and Capsule	- none -	- none -	Rod shape-determining protein RodA
fig|6666666.293769.peg.51	296.289	0.529354	0.204085	2.59379	0.00949235	0.0234161	Cell Wall and Capsule	Capsular and extracellular polysacchrides	Rhamnose containing glycans	UDP-glucose 4-epimerase (EC 5.1.3.2)
fig|6666666.293769.peg.1022	79.6235	0.741838	0.286557	2.5888	0.00963112	0.0237429	Cell Wall and Capsule	- none -	- none -	Membrane protein
fig|6666666.293769.peg.1925	366.105	-0.487029	0.195176	-2.49534	0.0125837	0.0298465	Cell Wall and Capsule	- none -	- none -	D-arabinose 5-phosphate isomerase (EC 5.3.1.13)
fig|6666666.293769.peg.633	188.194	0.54065	0.219758	2.4602	0.0138858	0.0323429	Cell Wall and Capsule	- none -	- none -	Tetraacyldisaccharide 4&#39;-kinase (EC 2.7.1.130)
fig|6666666.293769.peg.1179	411.041	-0.570579	0.236276	-2.41488	0.0157404	0.0358734	Cell Wall and Capsule	- none -	- none -	UDP-N-acetylenolpyruvoylglucosamine reductase (EC 1.3.1.98)
fig|6666666.293769.peg.1354	215.631	0.431808	0.179895	2.40034	0.0163798	0.0369668	Cell Wall and Capsule	- none -	- none -	putative membrane protein
fig|6666666.293769.peg.518	299.876	0.680505	0.287576	2.36635	0.0179647	0.0399047	Cell Wall and Capsule	- none -	- none -	Colanic acid biosynthesis glycosyl transferase WcaE
fig|6666666.293769.peg.74	273.929	0.39954	0.181402	2.20251	0.0276291	0.0567538	Cell Wall and Capsule	- none -	- none -	Acyl-[acyl-carrier-protein]--UDP-N-acetylglucosamine O-acyltransferase (EC 2.3.1.129)
fig|6666666.293769.peg.1407	194.859	0.570548	0.262895	2.17025	0.0299879	0.0608998	Cell Wall and Capsule	- none -	- none -	Multimodular transpeptidase-transglycosylase (EC 2.4.1.129) (EC 3.4.-.-)
fig|6666666.293769.peg.2195	186.259	0.812202	0.392317	2.07027	0.0384273	0.0752326	Cell Wall and Capsule	- none -	- none -	Membrane-bound lytic murein transglycosylase B
fig|6666666.293769.peg.1126	109.748	0.564028	0.274105	2.0577	0.0396186	0.0771035	Cell Wall and Capsule	Capsular and extracellular polysacchrides	Rhamnose containing glycans	dTDP-4-dehydrorhamnose reductase (EC 1.1.1.133)
fig|6666666.293769.peg.1493	20.1561	1.20688	0.587302	2.05496	0.0398825	0.0775161	Cell Wall and Capsule	- none -	- none -	1,6-anhydro-N-acetylmuramyl-L-alanine amidase
fig|6666666.293769.peg.2205	502.246	-0.412139	0.200832	-2.05216	0.0401545	0.0778435	Cell Wall and Capsule	Cell Wall and Capsule - no subcategory	Murein Hydrolases	Soluble lytic murein transglycosylase precursor (EC 3.2.1.-)
fig|6666666.293769.peg.896	190.07	0.659981	0.322595	2.04585	0.0407713	0.0788763	Cell Wall and Capsule	- none -	- none -	Heptose kinase WapQ, eukaryotic type
fig|6666666.293769.peg.212	726.068	-0.647436	0.324775	-1.99349	0.0462079	0.0865851	Cell Wall and Capsule	Cell Wall and Capsule - no subcategory	Recycling of Peptidoglycan Amino Acids	N-acetylmuramoyl-L-alanine amidase (EC 3.5.1.28)
fig|6666666.293769.peg.817	505.396	1.22576	0.630748	1.94335	0.0519739	0.09502	Cell Wall and Capsule	- none -	- none -	Putative transmembrane protein
fig|6666666.293769.peg.1236	20.8799	0.727872	0.392897	1.85258	0.0639427	0.112376	Cell Wall and Capsule	- none -	- none -	Murein-DD-endopeptidase (EC 3.4.99.-)
fig|6666666.293769.peg.261	1427.86	-0.336157	0.186322	-1.80417	0.0712051	0.122854	Cell Wall and Capsule	- none -	- none -	Glycerol-3-phosphate dehydrogenase [NAD(P)+] (EC 1.1.1.94)
fig|6666666.293769.peg.1646	23.9376	-0.598935	0.359683	-1.66517	0.0958781	0.157712	Cell Wall and Capsule	- none -	- none -	Cardiolipin synthase (EC 2.7.8.-), ClsA
fig|6666666.293769.peg.2922	354.444	-0.35016	0.214128	-1.63529	0.101989	0.164805	Cell Wall and Capsule	- none -	- none -	Membrane-bound lytic murein transglycosylase F (EC 4.2.2.n1)
fig|6666666.293769.peg.2553	7.3037	-1.053	0.646362	-1.62911	0.10329	0.166477	Cell Wall and Capsule	- none -	- none -	Uncharacterized membrane protein YCR061W
fig|6666666.293769.peg.2813	229.526	0.746127	0.459021	1.62547	0.104062	0.167506	Cell Wall and Capsule	- none -	- none -	Putative transmembrane protein
fig|6666666.293769.peg.2956	155.276	0.619484	0.391295	1.58316	0.113385	0.179969	Cell Wall and Capsule	- none -	- none -	putative lipoprotein
fig|6666666.293769.peg.548	501.671	0.364086	0.23089	1.57688	0.114824	0.18141	Cell Wall and Capsule	- none -	- none -	UDP-N-acetylmuramoylalanyl-D-glutamate--2,6-diaminopimelate ligase (EC 6.3.2.13)
fig|6666666.293769.peg.1623	25.5743	0.7168	0.457661	1.56622	0.117296	0.184154	Cell Wall and Capsule	- none -	- none -	Monofunctional biosynthetic peptidoglycan transglycosylase
fig|6666666.293769.peg.1985	671.653	0.287416	0.191665	1.49957	0.133725	0.204396	Cell Wall and Capsule	- none -	- none -	Multimodular transpeptidase-transglycosylase (EC 2.4.1.129) (EC 3.4.-.-)
fig|6666666.293769.peg.338	5.06394	-1.48416	0.990266	-1.49874	0.13394	0.204641	Cell Wall and Capsule	- none -	- none -	Rod shape determination protein
fig|6666666.293769.peg.1682	334.034	-0.234259	0.165929	-1.4118	0.158009	0.233716	Cell Wall and Capsule	- none -	- none -	CBS-domain-containing membrane protein
fig|6666666.293769.peg.897	323.986	0.499893	0.362833	1.37775	0.168281	0.245908	Cell Wall and Capsule	- none -	- none -	Lipopolysaccharide core heptose(I) kinase RfaP
fig|6666666.293769.peg.2256	311.92	0.404962	0.30155	1.34293	0.179293	0.259178	Cell Wall and Capsule	- none -	- none -	Outer membrane beta-barrel assembly protein BamB
fig|6666666.293769.peg.535	115.882	0.374803	0.286298	1.30914	0.190489	0.273363	Cell Wall and Capsule	Capsular and extracellular polysacchrides	Rhamnose containing glycans	dTDP-4-dehydrorhamnose 3,5-epimerase (EC 5.1.3.13)
fig|6666666.293769.peg.1492	34.2314	0.501062	0.387049	1.29457	0.195468	0.27923	Cell Wall and Capsule	- none -	- none -	1,6-anhydro-N-acetylmuramyl-L-alanine amidase
fig|6666666.293769.peg.1727	96.8801	-0.349573	0.283099	-1.23481	0.216903	0.305322	Cell Wall and Capsule	- none -	- none -	CDP-diacylglycerol--serine O-phosphatidyltransferase (EC 2.7.8.8)
fig|6666666.293769.peg.2409	178.662	-0.281627	0.230637	-1.22108	0.222055	0.311201	Cell Wall and Capsule	- none -	- none -	CDP-diacylglycerol--glycerol-3-phosphate 3-phosphatidyltransferase (EC 2.7.8.5)
fig|6666666.293769.peg.2578	277.228	-0.364848	0.306086	-1.19198	0.233269	0.323869	Cell Wall and Capsule	- none -	- none -	putative membrane protein
fig|6666666.293769.peg.1892	76.4226	0.49503	0.425373	1.16375	0.244524	0.336388	Cell Wall and Capsule	- none -	- none -	Phospholipid-binding protein
fig|6666666.293769.peg.1256	346.611	-0.506053	0.435589	-1.16177	0.245331	0.337128	Cell Wall and Capsule	- none -	- none -	Lipid A biosynthesis lauroyl acyltransferase (EC 2.3.1.241)
fig|6666666.293769.peg.479	203.48	-0.370831	0.329077	-1.12688	0.259792	0.352871	Cell Wall and Capsule	- none -	- none -	Phosphatidylserine decarboxylase (EC 4.1.1.65)
fig|6666666.293769.peg.547	786.452	-0.204795	0.182844	-1.12005	0.26269	0.35565	Cell Wall and Capsule	- none -	- none -	UDP-N-acetylmuramoyl-tripeptide--D-alanyl-D-alanine ligase (EC 6.3.2.10)
fig|6666666.293769.peg.2781	294.904	-0.21357	0.206023	-1.03663	0.299906	0.394934	Cell Wall and Capsule	- none -	- none -	Protein QmcA (possibly involved in integral membrane quality control)
fig|6666666.293769.peg.82	243.466	0.180203	0.190179	0.947545	0.343361	0.440426	Cell Wall and Capsule	- none -	- none -	2-Keto-3-deoxy-D-manno-octulosonate-8-phosphate synthase (EC 2.5.1.55)
fig|6666666.293769.peg.1568	228.578	0.221607	0.233978	0.947131	0.343572	0.440546	Cell Wall and Capsule	Cell Wall and Capsule - no subcategory	UDP-N-acetylmuramate from Fructose-6-phosphate Biosynthesis	N-acetylglucosamine-1-phosphate uridyltransferase (EC 2.7.7.23)
fig|6666666.293769.peg.1254	286.31	-0.210945	0.224779	-0.938452	0.348012	0.445631	Cell Wall and Capsule	- none -	- none -	Lipid A biosynthesis lauroyl acyltransferase (EC 2.3.1.241)
fig|6666666.293769.peg.1132	50.385	0.288919	0.339035	0.85218	0.394114	0.493398	Cell Wall and Capsule	- none -	- none -	2-polyprenylphenol hydroxylase and related flavodoxin oxidoreductases / CDP-6-deoxy-delta-3,4-glucoseen reductase-like
fig|6666666.293769.peg.834	1993.72	-0.307851	0.421447	-0.730462	0.465108	0.563681	Cell Wall and Capsule	- none -	- none -	Murein hydrolase activator NlpD
fig|6666666.293769.peg.759	462.998	-0.133509	0.183442	-0.7278	0.466736	0.565471	Cell Wall and Capsule	- none -	- none -	Outer membrane beta-barrel assembly protein BamE
fig|6666666.293769.peg.2169	2673.42	-0.191875	0.268442	-0.714773	0.474749	0.572963	Cell Wall and Capsule	- none -	- none -	putative lipoprotein
fig|6666666.293769.peg.1400	69.5287	0.227402	0.387323	0.587112	0.557128	0.650041	Cell Wall and Capsule	- none -	- none -	Inner membrane protein YedI
fig|6666666.293769.peg.1127	354.593	0.0843317	0.14965	0.563527	0.573076	0.664411	Cell Wall and Capsule	- none -	- none -	Carbamoyltransferase in large core OS assembly cluster
fig|6666666.293769.peg.4208	21.6796	0.360195	0.748948	0.480935	0.630563	0.713561	Cell Wall and Capsule	- none -	- none -	Putative inner membrane protein, DUF1819 superfamily
fig|6666666.293769.peg.1228	99.2662	0.0971459	0.25158	0.386143	0.699391	0.771466	Cell Wall and Capsule	- none -	- none -	beta-N-acetylglucosaminidase (EC 3.2.1.52)
fig|6666666.293769.peg.3025	101.884	0.0889913	0.246971	0.360332	0.718599	0.787796	Cell Wall and Capsule	- none -	- none -	Acyl-phosphate:glycerol-3-phosphate O-acyltransferase PlsY (EC 2.3.1.n3)
fig|6666666.293769.peg.1927	144.032	0.0918906	0.266167	0.345236	0.729917	0.796485	Cell Wall and Capsule	- none -	- none -	3-deoxy-D-manno-octulosonate 8-phosphate phosphatase (EC 3.1.3.45)
fig|6666666.293769.peg.4184	158.523	-0.0718066	0.215551	-0.33313	0.739036	0.803837	Cell Wall and Capsule	- none -	- none -	Murein-DD-endopeptidase (EC 3.4.99.-)
fig|6666666.293769.peg.3422	4.65781	-0.19193	0.801021	-0.239607	0.810635	0.862519	Cell Wall and Capsule	- none -	- none -	FIG016425: Soluble lytic murein transglycosylase and related regulatory proteins (some contain LysM/invasin domains)
fig|6666666.293769.peg.3057	199.994	-0.0481848	0.219693	-0.219327	0.826395	0.876557	Cell Wall and Capsule	- none -	- none -	Uncharacterized lipoprotein Bmul_4930
fig|6666666.293769.peg.138	863.579	0.0793321	0.375764	0.211122	0.832792	0.881352	Cell Wall and Capsule	Cell Wall and Capsule - no subcategory	UDP-N-acetylmuramate from Fructose-6-phosphate Biosynthesis	Phosphoglucosamine mutase (EC 5.4.2.10)
fig|6666666.293769.peg.2581	10.5277	-0.0881644	0.768281	-0.114755	0.908639	0.939494	Cell Wall and Capsule	- none -	- none -	putative membrane protein
fig|6666666.293769.peg.1617	88.4506	-0.0240171	0.246723	-0.0973446	0.922453	0.947936	Cell Wall and Capsule	Capsular and extracellular polysacchrides	Rhamnose containing glycans	Glucose-1-phosphate thymidylyltransferase (EC 2.7.7.24)
fig|6666666.293769.peg.2549	319.956	0.00824873	0.193238	0.0426868	0.965951	0.977661	Cell Wall and Capsule	- none -	- none -	CDP-diacylglycerol--glycerol-3-phosphate 3-phosphatidyltransferase (EC 2.7.8.5)
fig|6666666.293769.peg.1591	476.392	0.00507783	0.160424	0.0316525	0.974749	0.984305	Cell Wall and Capsule	- none -	- none -	UDP-galactose-lipid carrier transferase (EC 2.-.-.-)
fig|6666666.293769.peg.3047	64.6761	-0.0084125	0.290338	-0.0289748	0.976885	0.984632	Cell Wall and Capsule	Capsular and extracellular polysacchrides	Rhamnose containing glycans	Glucose-1-phosphate thymidylyltransferase (EC 2.7.7.24)
fig|6666666.293769.peg.1178	472.068	0.00335997	0.185177	0.0181447	0.985523	0.990003	Cell Wall and Capsule	- none -	- none -	UDP-N-acetylmuramate--L-alanine ligase (EC 6.3.2.8)
fig|6666666.293769.peg.3137	173.804	0.85398	0.146	5.84917	4.9402e-09	2.2914e-07	Cofactors, Vitamins, Prosthetic Groups, Pigments	Tetrapyrroles	Heme and Siroheme Biosynthesis	Coproporphyrinogen III oxidase, oxygen-independent (EC 1.3.99.22)
fig|6666666.293769.peg.2013	93.1091	1.4781	0.269912	5.47624	4.34453e-08	1.05306e-06	Cofactors, Vitamins, Prosthetic Groups, Pigments	- none -	- none -	Malonyl-[acyl-carrier protein] O-methyltransferase (EC 2.1.1.197)
fig|6666666.293769.peg.165	26.5123	2.87649	0.538005	5.34659	8.96288e-08	1.80072e-06	Cofactors, Vitamins, Prosthetic Groups, Pigments	Tetrapyrroles	Coenzyme B12 biosynthesis	Vitamin B12 ABC transporter, B12-binding component BtuF
fig|6666666.293769.peg.407	696.191	-1.28399	0.240353	-5.34211	9.18688e-08	1.81658e-06	Cofactors, Vitamins, Prosthetic Groups, Pigments	- none -	- none -	3-demethylubiquinol 3-O-methyltransferase (EC 2.1.1.64) @ 2-polyprenyl-6-hydroxyphenyl methylase (EC 2.1.1.222)
fig|6666666.293769.peg.1883	60.3321	1.02146	0.197982	5.15937	2.47784e-07	3.63642e-06	Cofactors, Vitamins, Prosthetic Groups, Pigments	- none -	- none -	Thiazole synthase (EC 2.8.1.10)
fig|6666666.293769.peg.776	33.8306	2.57426	0.505955	5.08793	3.62e-07	4.90281e-06	Cofactors, Vitamins, Prosthetic Groups, Pigments	- none -	- none -	1,4-dihydroxy-2-naphthoate polyprenyltransferase (EC 2.5.1.74)
fig|6666666.293769.peg.2271	433.586	1.42475	0.306157	4.65366	3.26087e-06	3.0101e-05	Cofactors, Vitamins, Prosthetic Groups, Pigments	Folate and pterines	Folate Biosynthesis	Dihydropteroate synthase (EC 2.5.1.15)
fig|6666666.293769.peg.2627	87.3108	3.06712	0.673684	4.55275	5.29491e-06	4.4404e-05	Cofactors, Vitamins, Prosthetic Groups, Pigments	- none -	- none -	Siroheme decarboxylase AhbA, alternate heme biosynthesis pathway / Siroheme decarboxylase AhbB, alternate heme biosynthesis pathway
fig|6666666.293769.peg.416	334.399	1.25724	0.284834	4.41393	1.0151e-05	7.61224e-05	Cofactors, Vitamins, Prosthetic Groups, Pigments	Tetrapyrroles	Heme and Siroheme Biosynthesis	Glutamyl-tRNA reductase (EC 1.2.1.70)
fig|6666666.293769.peg.2566	158.93	1.36645	0.30994	4.40875	1.03967e-05	7.76546e-05	Cofactors, Vitamins, Prosthetic Groups, Pigments	Coenzyme A	Coenzyme A Biosynthesis	Pantothenate kinase type III, CoaX-like (EC 2.7.1.33)
fig|6666666.293769.peg.816	433.202	1.07283	0.270205	3.97043	7.17428e-05	0.000385605	Cofactors, Vitamins, Prosthetic Groups, Pigments	- none -	- none -	Phosphomethylpyrimidine synthase ThiC (EC 4.1.99.17)
fig|6666666.293769.peg.307	245.235	1.02099	0.257659	3.96258	7.41449e-05	0.000396812	Cofactors, Vitamins, Prosthetic Groups, Pigments	Folate and pterines	Folate Biosynthesis	Dihydrofolate synthase (EC 6.3.2.12)
fig|6666666.293769.peg.2350	129.936	1.36851	0.352479	3.88252	0.000103381	0.000527007	Cofactors, Vitamins, Prosthetic Groups, Pigments	Folate and pterines	5-FCL-like protein	Isocitrate dehydrogenase [NADP] (EC 1.1.1.42)
fig|6666666.293769.peg.2960	20.4573	1.49039	0.387343	3.84773	0.000119218	0.000597202	Cofactors, Vitamins, Prosthetic Groups, Pigments	Tetrapyrroles	Coenzyme B12 biosynthesis	Cob(I)alamin adenosyltransferase (EC 2.5.1.17)
fig|6666666.293769.peg.80	337.006	0.77894	0.204377	3.8113	0.00013824	0.000674503	Cofactors, Vitamins, Prosthetic Groups, Pigments	Folate and pterines	Folate biosynthesis cluster	tRNA(Ile)-lysidine synthetase (EC 6.3.4.19)
fig|6666666.293769.peg.1885	307.16	-0.653569	0.171637	-3.80785	0.000140183	0.000683095	Cofactors, Vitamins, Prosthetic Groups, Pigments	Biotin	Biotin biosynthesis	Long-chain-fatty-acid--CoA ligase (EC 6.2.1.3)
fig|6666666.293769.peg.1603	140.202	1.29904	0.350913	3.70189	0.000214	0.000980485	Cofactors, Vitamins, Prosthetic Groups, Pigments	- none -	- none -	2-methoxy-6-polyprenyl-1,4-benzoquinol methylase (EC 2.1.1.201)
fig|6666666.293769.peg.1604	103.885	0.961739	0.262436	3.66465	0.000247673	0.00110119	Cofactors, Vitamins, Prosthetic Groups, Pigments	- none -	- none -	O-succinylbenzoic acid--CoA ligase (EC 6.2.1.26)
fig|6666666.293769.peg.1521	249.065	0.916868	0.253055	3.62319	0.00029099	0.00125661	Cofactors, Vitamins, Prosthetic Groups, Pigments	Coenzyme A	Coenzyme A Biosynthesis	Pantoate--beta-alanine ligase (EC 6.3.2.1)
fig|6666666.293769.peg.1825	156.127	0.907439	0.251566	3.60716	0.000309569	0.00131567	Cofactors, Vitamins, Prosthetic Groups, Pigments	Riboflavin, FMN, FAD	Riboflavin, FMN and FAD metabolism	Riboflavin kinase (EC 2.7.1.26)
fig|6666666.293769.peg.1621	200.601	0.538213	0.149265	3.60574	0.00031126	0.00131838	Cofactors, Vitamins, Prosthetic Groups, Pigments	- none -	- none -	Chorismate--pyruvate lyase (EC 4.1.3.40)
fig|6666666.293769.peg.1659	107.588	1.02581	0.285182	3.59704	0.000321861	0.00134658	Cofactors, Vitamins, Prosthetic Groups, Pigments	- none -	- none -	Flavin prenyltransferase UbiX
fig|6666666.293769.peg.575	49.0843	1.56557	0.456985	3.42588	0.000612816	0.00229318	Cofactors, Vitamins, Prosthetic Groups, Pigments	Folate and pterines	5-FCL-like protein	Thiamin-phosphate pyrophosphorylase (EC 2.5.1.3)
fig|6666666.293769.peg.1902	399.472	-0.815504	0.239663	-3.40271	0.000667213	0.00247211	Cofactors, Vitamins, Prosthetic Groups, Pigments	Tetrapyrroles	Coenzyme B12 biosynthesis	Cobalamin synthase (EC 2.7.8.26)
fig|6666666.293769.peg.574	144.983	0.937148	0.276954	3.38377	0.000714989	0.00263096	Cofactors, Vitamins, Prosthetic Groups, Pigments	- none -	- none -	Hydroxymethylpyrimidine phosphate kinase ThiD (EC 2.7.4.7)
fig|6666666.293769.peg.411	383.745	-0.609005	0.183372	-3.32114	0.000896519	0.00322318	Cofactors, Vitamins, Prosthetic Groups, Pigments	- none -	- none -	Cyclic pyranopterin monophosphate synthase accessory protein
fig|6666666.293769.peg.1514	334.219	0.827984	0.249884	3.31348	0.000921431	0.00329383	Cofactors, Vitamins, Prosthetic Groups, Pigments	Coenzyme A	Coenzyme A Biosynthesis	Aspartate 1-decarboxylase (EC 4.1.1.11)
fig|6666666.293769.peg.474	250.082	1.37512	0.424089	3.24254	0.00118471	0.00405371	Cofactors, Vitamins, Prosthetic Groups, Pigments	Riboflavin, FMN, FAD	Riboflavin, FMN and FAD metabolism	3,4-dihydroxy-2-butanone 4-phosphate synthase (EC 4.1.99.12)
fig|6666666.293769.peg.492	540.616	-0.467055	0.144565	-3.23076	0.00123463	0.00418639	Cofactors, Vitamins, Prosthetic Groups, Pigments	- none -	- none -	2-methoxy-6-polyprenyl-1,4-benzoquinol methylase (EC 2.1.1.201)
fig|6666666.293769.peg.475	219.321	0.861713	0.271591	3.17284	0.00150956	0.00494025	Cofactors, Vitamins, Prosthetic Groups, Pigments	Riboflavin, FMN, FAD	Riboflavin, FMN and FAD metabolism	Riboflavin synthase eubacterial/eukaryotic (EC 2.5.1.9)
fig|6666666.293769.peg.1369	189.387	0.784295	0.254892	3.07697	0.00209119	0.00649844	Cofactors, Vitamins, Prosthetic Groups, Pigments	- none -	Riboflavin synthesis cluster	Orotidine 5&#39;-phosphate decarboxylase (EC 4.1.1.23)
fig|6666666.293769.peg.1852	2971.01	-0.996982	0.33081	-3.01376	0.0025803	0.00783685	Cofactors, Vitamins, Prosthetic Groups, Pigments	Tetrapyrroles	Heme and Siroheme Biosynthesis	Ferrochelatase, protoheme ferro-lyase (EC 4.99.1.1)
fig|6666666.293769.peg.1850	10.5536	1.74588	0.586196	2.97831	0.00289839	0.0086698	Cofactors, Vitamins, Prosthetic Groups, Pigments	- none -	ar-431-EC Molybdopterin-guanine dinucleotide biosynthesis	Molybdopterin-guanine dinucleotide biosynthesis protein MobB
fig|6666666.293769.peg.164	126.006	0.615327	0.210848	2.91835	0.00351891	0.0102382	Cofactors, Vitamins, Prosthetic Groups, Pigments	Tetrapyrroles	Heme and Siroheme Biosynthesis	Porphobilinogen deaminase (EC 2.5.1.61)
fig|6666666.293769.peg.473	70.0248	1.17364	0.405894	2.8915	0.00383412	0.0109808	Cofactors, Vitamins, Prosthetic Groups, Pigments	Riboflavin, FMN, FAD	Riboflavin, FMN and FAD metabolism	6,7-dimethyl-8-ribityllumazine synthase (EC 2.5.1.78)
fig|6666666.293769.peg.1740	127.212	1.10053	0.388175	2.83513	0.00458065	0.0127762	Cofactors, Vitamins, Prosthetic Groups, Pigments	- none -	- none -	Protein similar to cobyrinic acid a,c-diamide synthetase clustered with dissimilatory sulfite reductase
fig|6666666.293769.peg.2961	165.551	0.574705	0.205324	2.79902	0.00512584	0.0140261	Cofactors, Vitamins, Prosthetic Groups, Pigments	- none -	- none -	7-cyano-7-deazaguanine synthase (EC 6.3.4.20)
fig|6666666.293769.peg.1942	52.3731	0.951385	0.341869	2.78289	0.00538772	0.0145938	Cofactors, Vitamins, Prosthetic Groups, Pigments	Riboflavin, FMN, FAD	Riboflavin, FMN and FAD metabolism	Riboflavin synthase eubacterial/eukaryotic (EC 2.5.1.9)
fig|6666666.293769.peg.2241	36.4446	1.04997	0.393753	2.66657	0.00766307	0.019466	Cofactors, Vitamins, Prosthetic Groups, Pigments	- none -	Riboflavin synthesis cluster	Diacylglycerol kinase (EC 2.7.1.107)
fig|6666666.293769.peg.1508	825.262	-0.640321	0.243592	-2.62866	0.00857208	0.0214989	Cofactors, Vitamins, Prosthetic Groups, Pigments	Tetrapyrroles	Coenzyme B12 biosynthesis	Uroporphyrinogen-III methyltransferase (EC 2.1.1.107)
fig|6666666.293769.peg.576	131.304	0.97235	0.385777	2.5205	0.0117189	0.0281103	Cofactors, Vitamins, Prosthetic Groups, Pigments	- none -	- none -	Glutamate-1-semialdehyde 2,1-aminomutase (EC 5.4.3.8)
fig|6666666.293769.peg.573	47.663	1.35323	0.540971	2.50149	0.0123672	0.0294447	Cofactors, Vitamins, Prosthetic Groups, Pigments	Tetrapyrroles	Heme and Siroheme Biosynthesis	Protoporphyrinogen IX oxidase, novel form, HemJ (EC 1.3.-.-)
fig|6666666.293769.peg.1909	32.4451	1.08615	0.446339	2.43345	0.0149555	0.0344499	Cofactors, Vitamins, Prosthetic Groups, Pigments	- none -	- none -	Molybdopterin-synthase adenylyltransferase (EC 2.7.7.80)
fig|6666666.293769.peg.1279	82.4343	0.770781	0.318572	2.41949	0.0155424	0.0355403	Cofactors, Vitamins, Prosthetic Groups, Pigments	Pyridoxine	Pyridoxin (Vitamin B6) Biosynthesis	4-hydroxythreonine-4-phosphate dehydrogenase (EC 1.1.1.262)
fig|6666666.293769.peg.620	1008.18	-0.804863	0.34484	-2.33402	0.0195947	0.0428008	Cofactors, Vitamins, Prosthetic Groups, Pigments	NAD and NADP	NAD and NADP cofactor biosynthesis global	NAD synthetase (EC 6.3.1.5)
fig|6666666.293769.peg.476	355.184	0.541514	0.232357	2.33053	0.0197781	0.0431012	Cofactors, Vitamins, Prosthetic Groups, Pigments	Riboflavin, FMN, FAD	Riboflavin, FMN and FAD metabolism	5-amino-6-(5-phosphoribosylamino)uracil reductase (EC 1.1.1.193)
fig|6666666.293769.peg.1284	543.294	-0.466292	0.200785	-2.32234	0.0202144	0.0439755	Cofactors, Vitamins, Prosthetic Groups, Pigments	Folate and pterines	Folate Biosynthesis	FolM Alternative dihydrofolate reductase 1
fig|6666666.293769.peg.2010	932.429	-0.444945	0.196677	-2.26231	0.0236784	0.0500617	Cofactors, Vitamins, Prosthetic Groups, Pigments	Biotin	Biotin biosynthesis Experimental	Biotin synthase (EC 2.8.1.6)
fig|6666666.293769.peg.3150	205.931	0.466551	0.206634	2.25786	0.0239545	0.0505318	Cofactors, Vitamins, Prosthetic Groups, Pigments	- none -	- none -	2-polyprenylphenol hydroxylase
fig|6666666.293769.peg.2419	105.078	0.59385	0.263692	2.25206	0.0243184	0.0509561	Cofactors, Vitamins, Prosthetic Groups, Pigments	Riboflavin, FMN, FAD	Riboflavin, FMN and FAD metabolism	GTP cyclohydrolase II (EC 3.5.4.25)
fig|6666666.293769.peg.470	119.659	0.53194	0.237926	2.23574	0.025369	0.052892	Cofactors, Vitamins, Prosthetic Groups, Pigments	- none -	Riboflavin synthesis cluster	Phosphatidylglycerophosphatase A (EC 3.1.3.27)
fig|6666666.293769.peg.2067	348.968	-0.34281	0.153722	-2.23006	0.0257432	0.0535236	Cofactors, Vitamins, Prosthetic Groups, Pigments	Tetrapyrroles	Heme and Siroheme Biosynthesis	Uroporphyrinogen-III synthase (EC 4.2.1.75)
fig|6666666.293769.peg.2428	84.0039	0.734585	0.329824	2.2272	0.0259339	0.0538605	Cofactors, Vitamins, Prosthetic Groups, Pigments	Cofactors, Vitamins, Prosthetic Groups, Pigments - no subcategory	Thiamin biosynthesis	Glycine oxidase ThiO (EC 1.4.3.19)
fig|6666666.293769.peg.1899	150.878	0.544248	0.261166	2.08392	0.0371676	0.0731092	Cofactors, Vitamins, Prosthetic Groups, Pigments	Tetrapyrroles	Coenzyme B12 biosynthesis	Adenosylcobinamide-phosphate guanylyltransferase (EC 2.7.7.62)
fig|6666666.293769.peg.491	215.857	0.438295	0.211528	2.07205	0.0382611	0.0749462	Cofactors, Vitamins, Prosthetic Groups, Pigments	- none -	- none -	Ubiquinone biosynthesis protein UbiJ
fig|6666666.293769.peg.278	198.412	0.490346	0.239964	2.04342	0.041011	0.0791393	Cofactors, Vitamins, Prosthetic Groups, Pigments	Pyridoxine	Pyridoxin (Vitamin B6) Biosynthesis	Pyridoxine 5'-phosphate synthase (EC 2.6.99.2)
fig|6666666.293769.peg.1620	149.743	0.515738	0.253507	2.03441	0.0419098	0.0805221	Cofactors, Vitamins, Prosthetic Groups, Pigments	- none -	- none -	4-hydroxybenzoate polyprenyltransferase (EC 2.5.1.39)
fig|6666666.293769.peg.168	403.416	0.708343	0.349623	2.02602	0.0427624	0.0816353	Cofactors, Vitamins, Prosthetic Groups, Pigments	Tetrapyrroles	Coenzyme B12 biosynthesis	Outer membrane vitamin B12 receptor BtuB
fig|6666666.293769.peg.777	145.476	0.563254	0.279716	2.01366	0.0440448	0.0834895	Cofactors, Vitamins, Prosthetic Groups, Pigments	- none -	- none -	Naphthoate synthase (EC 4.1.3.36)
fig|6666666.293769.peg.2968	65.433	0.711722	0.353655	2.01248	0.0441697	0.0835732	Cofactors, Vitamins, Prosthetic Groups, Pigments	- none -	- none -	Molybdopterin adenylyltransferase (EC 2.7.7.75)
fig|6666666.293769.peg.2585	280.931	-0.558476	0.28714	-1.94496	0.0517799	0.094864	Cofactors, Vitamins, Prosthetic Groups, Pigments	Coenzyme A	Coenzyme A Biosynthesis	Phosphopantetheine adenylyltransferase (EC 2.7.7.3)
fig|6666666.293769.peg.1803	11.0907	1.76744	0.911002	1.9401	0.0523671	0.0956457	Cofactors, Vitamins, Prosthetic Groups, Pigments	Lipoic acid	Lipoic acid metabolism	Proposed lipoate regulatory protein YbeD
fig|6666666.293769.peg.1339	112.802	0.503256	0.260891	1.92899	0.053732	0.0976167	Cofactors, Vitamins, Prosthetic Groups, Pigments	- none -	LMPTP YfkJ cluster; <br>Riboflavin synthesis cluster	Inner membrane protein YihY, formerly thought to be RNase BN
fig|6666666.293769.peg.503	112.265	0.475702	0.252245	1.88587	0.059312	0.105636	Cofactors, Vitamins, Prosthetic Groups, Pigments	- none -	- none -	GTP cyclohydrolase 1 type 2 homolog YbgI
fig|6666666.293769.peg.2800	363.72	0.712783	0.381549	1.86813	0.0617439	0.109317	Cofactors, Vitamins, Prosthetic Groups, Pigments	Tetrapyrroles	Heme and Siroheme Biosynthesis	Coproporphyrinogen III oxidase, aerobic (EC 1.3.3.3)
fig|6666666.293769.peg.2012	202.969	0.376725	0.205601	1.83231	0.0669055	0.116751	Cofactors, Vitamins, Prosthetic Groups, Pigments	- none -	- none -	Pimeloyl-[acyl-carrier protein] methyl ester esterase BioH (EC 3.1.1.85)
fig|6666666.293769.peg.1519	171.73	-0.437865	0.245383	-1.78442	0.0743561	0.127618	Cofactors, Vitamins, Prosthetic Groups, Pigments	Folate and pterines	Folate Biosynthesis	2-amino-4-hydroxy-6-hydroxymethyldihydropteridine pyrophosphokinase (EC 2.7.6.3)
fig|6666666.293769.peg.1851	27.635	0.658765	0.384349	1.71398	0.086533	0.145485	Cofactors, Vitamins, Prosthetic Groups, Pigments	- none -	- none -	Molybdopterin molybdenumtransferase (EC 2.10.1.1)
fig|6666666.293769.peg.1644	238.802	0.285644	0.182799	1.56261	0.118143	0.185252	Cofactors, Vitamins, Prosthetic Groups, Pigments	- none -	- none -	Molybdenum cofactor guanylyltransferase (EC 2.7.7.77)
fig|6666666.293769.peg.1993	490.948	0.484832	0.320977	1.51049	0.130919	0.200842	Cofactors, Vitamins, Prosthetic Groups, Pigments	- none -	- none -	Cytochrome b561
fig|6666666.293769.peg.1175	84.4043	0.511851	0.345961	1.47951	0.139005	0.211093	Cofactors, Vitamins, Prosthetic Groups, Pigments	- none -	- none -	Nicotinamide-nucleotide amidase (EC 3.5.1.42)
fig|6666666.293769.peg.3350	110.728	-0.361538	0.246024	-1.46952	0.141691	0.213961	Cofactors, Vitamins, Prosthetic Groups, Pigments	Biotin	Biotin biosynthesis Experimental	Dethiobiotin synthetase (EC 6.3.3.3)
fig|6666666.293769.peg.1990	379.27	-0.313935	0.214295	-1.46496	0.142931	0.215313	Cofactors, Vitamins, Prosthetic Groups, Pigments	- none -	- none -	Cyclic pyranopterin phosphate synthase (MoaA) (EC 4.1.99.18)
fig|6666666.293769.peg.596	218.611	-0.404955	0.278947	-1.45173	0.146577	0.219573	Cofactors, Vitamins, Prosthetic Groups, Pigments	- none -	- none -	3-polyprenyl-4-hydroxybenzoate carboxy-lyase (EC 4.1.1.98)
fig|6666666.293769.peg.13	2.88572	-2.09189	1.52751	-1.36948	0.17085	0.2486	Cofactors, Vitamins, Prosthetic Groups, Pigments	Tetrapyrroles	Coenzyme B12 biosynthesis	Aerobic cobaltochelatase CobS subunit (EC 6.6.1.2)
fig|6666666.293769.peg.2267	128.638	0.351811	0.287027	1.2257	0.22031	0.309422	Cofactors, Vitamins, Prosthetic Groups, Pigments	- none -	- none -	Molybdopterin molybdenumtransferase (EC 2.10.1.1)
fig|6666666.293769.peg.981	675.906	-0.187663	0.153901	-1.21937	0.222702	0.31162	Cofactors, Vitamins, Prosthetic Groups, Pigments	Coenzyme A	Coenzyme A Biosynthesis	Phosphopantothenoylcysteine synthetase (EC 6.3.2.5)
fig|6666666.293769.peg.600	132.112	-0.315829	0.262234	-1.20438	0.228443	0.318615	Cofactors, Vitamins, Prosthetic Groups, Pigments	Tetrapyrroles	Heme and Siroheme Biosynthesis	Radical SAM family enzyme, similar to coproporphyrinogen III oxidase, oxygen-independent, clustered with nucleoside-triphosphatase RdgB
fig|6666666.293769.peg.599	232.882	-0.256368	0.213809	-1.19906	0.230506	0.320745	Cofactors, Vitamins, Prosthetic Groups, Pigments	- none -	- none -	NAD(P)H-hydrate epimerase (EC 5.1.99.6) / ADP-dependent (S)-NAD(P)H-hydrate dehydratase (EC 4.2.1.136)
fig|6666666.293769.peg.2825	54.5419	0.357072	0.303837	1.17521	0.23991	0.331254	Cofactors, Vitamins, Prosthetic Groups, Pigments	- none -	- none -	D-erythro-7,8-dihydroneopterin triphosphate epimerase
fig|6666666.293769.peg.2171	44.2219	-0.399361	0.351707	-1.13549	0.256168	0.349211	Cofactors, Vitamins, Prosthetic Groups, Pigments	Tetrapyrroles	Coenzyme B12 biosynthesis	Cobyric acid synthase (EC 6.3.5.10)
fig|6666666.293769.peg.598	138.963	-0.262761	0.233233	-1.12661	0.259909	0.352901	Cofactors, Vitamins, Prosthetic Groups, Pigments	- none -	- none -	NAD(P)H-hydrate epimerase (EC 5.1.99.6) / ADP-dependent (S)-NAD(P)H-hydrate dehydratase (EC 4.2.1.136)
fig|6666666.293769.peg.2766	145.011	-0.23799	0.221793	-1.07303	0.283259	0.37711	Cofactors, Vitamins, Prosthetic Groups, Pigments	Folate and pterines	Folate Biosynthesis	2-amino-4-hydroxy-6-hydroxymethyldihydropteridine pyrophosphokinase (EC 2.7.6.3)
fig|6666666.293769.peg.3095	60.3592	0.320639	0.305262	1.05037	0.293546	0.388055	Cofactors, Vitamins, Prosthetic Groups, Pigments	- none -	- none -	7-carboxy-7-deazaguanine synthase (EC 4.3.99.3)
fig|6666666.293769.peg.425	152.787	-0.29624	0.29018	-1.02088	0.307311	0.402528	Cofactors, Vitamins, Prosthetic Groups, Pigments	- none -	- none -	2-polyprenyl-3-methyl-6-methoxy-1,4-benzoquinol hydroxylase, coq7 type
fig|6666666.293769.peg.243	296.038	0.198797	0.225928	0.879913	0.378906	0.477862	Cofactors, Vitamins, Prosthetic Groups, Pigments	Tetrapyrroles	Heme and Siroheme Biosynthesis	Porphobilinogen synthase (EC 4.2.1.24)
fig|6666666.293769.peg.1047	22.5426	0.320535	0.369845	0.866673	0.386121	0.485494	Cofactors, Vitamins, Prosthetic Groups, Pigments	- none -	- none -	Thiamin biosynthesis lipoprotein ApbE
fig|6666666.293769.peg.3094	212.368	0.187027	0.218531	0.855838	0.392087	0.49168	Cofactors, Vitamins, Prosthetic Groups, Pigments	- none -	- none -	6-carboxy-5,6,7,8-tetrahydropterin synthase (EC 4.1.2.50)
fig|6666666.293769.peg.1900	166.052	0.159381	0.189862	0.839461	0.401211	0.500947	Cofactors, Vitamins, Prosthetic Groups, Pigments	Tetrapyrroles	Coenzyme B12 biosynthesis	Nicotinate-nucleotide--dimethylbenzimidazole phosphoribosyltransferase (EC 2.4.2.21)
fig|6666666.293769.peg.2997	89.738	-0.197093	0.23487	-0.839159	0.40138	0.500991	Cofactors, Vitamins, Prosthetic Groups, Pigments	Folate and pterines	5-FCL-like protein	Dihydrofolate reductase (EC 1.5.1.3)
fig|6666666.293769.peg.471	254.206	0.146528	0.191202	0.766351	0.443467	0.543237	Cofactors, Vitamins, Prosthetic Groups, Pigments	Folate and pterines	5-FCL-like protein	Thiamine-monophosphate kinase (EC 2.7.4.16)
fig|6666666.293769.peg.778	77.0474	0.146826	0.192599	0.762337	0.445859	0.545277	Cofactors, Vitamins, Prosthetic Groups, Pigments	- none -	- none -	2-succinyl-5-enolpyruvyl-6-hydroxy-3-cyclohexene-1-carboxylic-acid synthase (EC 2.2.1.9)
fig|6666666.293769.peg.2826	121.341	0.199727	0.268044	0.745129	0.456194	0.554666	Cofactors, Vitamins, Prosthetic Groups, Pigments	Folate and pterines	Folate Biosynthesis	GTP cyclohydrolase I (EC 3.5.4.16) type 1
fig|6666666.293769.peg.2172	328.973	0.233829	0.324313	0.721	0.47091	0.569243	Cofactors, Vitamins, Prosthetic Groups, Pigments	Tetrapyrroles	Coenzyme B12 biosynthesis	Adenosylcobinamide-phosphate synthase (EC 6.3.1.10)
fig|6666666.293769.peg.795	5874.41	-0.31495	0.456289	-0.690243	0.490041	0.587643	Cofactors, Vitamins, Prosthetic Groups, Pigments	Biotin	Biotin biosynthesis	Long-chain-fatty-acid--CoA ligase (EC 6.2.1.3)
fig|6666666.293769.peg.1194	203.199	-0.223039	0.33134	-0.673141	0.500857	0.597561	Cofactors, Vitamins, Prosthetic Groups, Pigments	NAD and NADP	NAD and NADP cofactor biosynthesis global	Nicotinate-nucleotide adenylyltransferase (EC 2.7.7.18)
fig|6666666.293769.peg.1310	393.601	0.158445	0.247841	0.639303	0.522626	0.619207	Cofactors, Vitamins, Prosthetic Groups, Pigments	Tetrapyrroles	Heme and Siroheme Biosynthesis	Uroporphyrinogen III decarboxylase (EC 4.1.1.37)
fig|6666666.293769.peg.1319	497.244	0.152419	0.24314	0.626875	0.530741	0.626254	Cofactors, Vitamins, Prosthetic Groups, Pigments	- none -	- none -	2-polyprenyl-6-methoxyphenol hydroxylase
fig|6666666.293769.peg.762	166.884	0.135248	0.217539	0.62172	0.534126	0.628669	Cofactors, Vitamins, Prosthetic Groups, Pigments	NAD and NADP	NAD and NADP cofactor biosynthesis global	NAD kinase (EC 2.7.1.23)
fig|6666666.293769.peg.1884	14.1394	0.306291	0.519636	0.589435	0.55557	0.648733	Cofactors, Vitamins, Prosthetic Groups, Pigments	Cofactors, Vitamins, Prosthetic Groups, Pigments - no subcategory	Thiamin biosynthesis	Sulfur carrier protein ThiS
fig|6666666.293769.peg.2767	67.5332	-0.158263	0.281558	-0.562098	0.57405	0.665034	Cofactors, Vitamins, Prosthetic Groups, Pigments	Folate and pterines	Folate Biosynthesis	Dihydroneopterin aldolase (EC 4.1.2.25)
fig|6666666.293769.peg.2270	132.758	-0.0941059	0.193526	-0.486271	0.626775	0.710902	Cofactors, Vitamins, Prosthetic Groups, Pigments	- none -	- none -	Molybdopterin-synthase adenylyltransferase (EC 2.7.7.80)
fig|6666666.293769.peg.2065	192.434	-0.0942836	0.195075	-0.483321	0.628868	0.71292	Cofactors, Vitamins, Prosthetic Groups, Pigments	- none -	- none -	Uncharacterized protein EC-HemY, likely associated with heme metabolism based on gene clustering with hemC, hemD in Proteobacteria (unrelated to HemY-type PPO in GramPositives)
fig|6666666.293769.peg.1520	1052.8	0.0935089	0.236422	0.395517	0.692461	0.76562	Cofactors, Vitamins, Prosthetic Groups, Pigments	Coenzyme A	Coenzyme A Biosynthesis	3-methyl-2-oxobutanoate hydroxymethyltransferase (EC 2.1.2.11)
fig|6666666.293769.peg.2011	216.992	0.101911	0.273248	0.372961	0.709178	0.779971	Cofactors, Vitamins, Prosthetic Groups, Pigments	Biotin	Biotin biosynthesis Experimental	8-amino-7-oxononanoate synthase (EC 2.3.1.47)
fig|6666666.293769.peg.2959	45.78	-0.0943265	0.271162	-0.34786	0.727945	0.795026	Cofactors, Vitamins, Prosthetic Groups, Pigments	Tetrapyrroles	Coenzyme B12 biosynthesis	5,6-dimethylbenzimidazole synthase, flavin destructase family
fig|6666666.293769.peg.412	240.893	0.107696	0.322985	0.333441	0.738801	0.803837	Cofactors, Vitamins, Prosthetic Groups, Pigments	- none -	- none -	Molybdopterin synthase sulfur carrier subunit
fig|6666666.293769.peg.413	102.104	0.0886484	0.332558	0.266565	0.789804	0.845865	Cofactors, Vitamins, Prosthetic Groups, Pigments	- none -	- none -	Molybdopterin synthase catalytic subunit MoaE (EC 2.8.1.12)
fig|6666666.293769.peg.490	466.189	0.0342523	0.236993	0.144528	0.885083	0.921846	Cofactors, Vitamins, Prosthetic Groups, Pigments	- none -	- none -	Ubiquinone biosynthesis regulatory protein kinase UbiB
fig|6666666.293769.peg.1597	459.044	-0.0273435	0.256335	-0.106671	0.91505	0.944203	Cofactors, Vitamins, Prosthetic Groups, Pigments	Biotin	Biotin biosynthesis Experimental	Adenosylmethionine-8-amino-7-oxononanoate aminotransferase (EC 2.6.1.62)
fig|6666666.293769.peg.1901	191.392	-0.0202851	0.222363	-0.0912251	0.927314	0.951111	Cofactors, Vitamins, Prosthetic Groups, Pigments	Miscellaneous - no subcategory	Phosphoglycerate mutase protein family	Alpha-ribazole-5'-phosphate phosphatase (EC 3.1.3.73)
fig|6666666.293769.peg.775	362.027	0.0172713	0.239346	0.0721604	0.942474	0.961135	Cofactors, Vitamins, Prosthetic Groups, Pigments	Miscellaneous - no subcategory	Muconate lactonizing enzyme family	O-succinylbenzoate synthase (EC 4.2.1.113)
fig|6666666.293769.peg.2279	168.716	-0.0154709	0.255018	-0.0606657	0.951625	0.968117	Cofactors, Vitamins, Prosthetic Groups, Pigments	Coenzyme A	Coenzyme A Biosynthesis	Dephospho-CoA kinase (EC 2.7.1.24)
fig|6666666.293769.peg.11	2.97904	-0.035694	1.44609	-0.0246831	0.980308	0.98666	Cofactors, Vitamins, Prosthetic Groups, Pigments	- none -	- none -	Cobalamine biosynthesis protein
fig|6666666.293769.peg.1891	212.703	1.7023	0.313412	5.4315	5.58827e-08	1.26077e-06	DNA Metabolism	- none -	- none -	DNA translocase FtsK
fig|6666666.293769.peg.2753	124.872	1.36585	0.290114	4.70797	2.50194e-06	2.3918e-05	DNA Metabolism	DNA repair	DNA repair, bacterial DinG and relatives	ATP-dependent helicase DinG/Rad3
fig|6666666.293769.peg.4213	65.1194	-1.71903	0.373072	-4.60778	4.07e-06	3.57266e-05	DNA Metabolism	- none -	- none -	DNA helicase, phage associated; Type III restriction enzme
fig|6666666.293769.peg.1585	180.736	0.859361	0.190994	4.49942	6.81383e-06	5.48171e-05	DNA Metabolism	DNA repair	DNA repair, bacterial	DNA recombination protein RmuC
fig|6666666.293769.peg.359	195.315	1.12523	0.258896	4.34627	1.38469e-05	9.6877e-05	DNA Metabolism	- none -	- none -	Holliday junction ATP-dependent DNA helicase RuvB (EC 3.6.4.12)
fig|6666666.293769.peg.3090	636.482	-0.651466	0.154315	-4.22167	2.42495e-05	0.000155769	DNA Metabolism	DNA uptake, competence	DNA processing cluster	Recombination protein RecR
fig|6666666.293769.peg.879	202.018	2.07887	0.507544	4.09594	4.20467e-05	0.000251945	DNA Metabolism	DNA Metabolism - no subcategory	Restriction-Modification System	Type I restriction-modification system, restriction subunit R (EC 3.1.21.3)
fig|6666666.293769.peg.3093	283.929	0.66901	0.164082	4.0773	4.55615e-05	0.00026746	DNA Metabolism	DNA uptake, competence	DNA processing cluster	DNA polymerase III subunits gamma and tau (EC 2.7.7.7)
fig|6666666.293769.peg.3905	26.6421	1.60543	0.397342	4.04043	5.33539e-05	0.000300525	DNA Metabolism	DNA Metabolism - no subcategory	Restriction-Modification System	Type I restriction-modification system, restriction subunit R (EC 3.1.21.3)
fig|6666666.293769.peg.358	129.444	1.31202	0.329888	3.97716	6.97431e-05	0.000376472	DNA Metabolism	- none -	- none -	Holliday junction ATP-dependent DNA helicase RuvA (EC 3.6.4.12)
fig|6666666.293769.peg.691	111.501	-0.752075	0.197952	-3.79929	0.000145113	0.000702564	DNA Metabolism	DNA repair	DNA repair, bacterial	DNA repair protein RadA
fig|6666666.293769.peg.3789	19.8395	-3.25891	0.891414	-3.65589	0.000256295	0.00112884	DNA Metabolism	DNA repair	DNA repair, bacterial RecFOR pathway	Single-stranded DNA-binding protein
fig|6666666.293769.peg.699	88.0941	2.03407	0.562611	3.61542	0.00029986	0.00128751	DNA Metabolism	DNA repair	DNA repair, bacterial	Methylated-DNA--protein-cysteine methyltransferase (EC 2.1.1.63)
fig|6666666.293769.peg.1003	97.2971	1.19591	0.331666	3.60575	0.000311254	0.00131838	DNA Metabolism	- none -	- none -	DNA recombination-dependent growth factor RdgC
fig|6666666.293769.peg.1202	99.4359	1.44821	0.402254	3.60024	0.000317918	0.00133604	DNA Metabolism	- none -	- none -	Helicase PriA essential for oriC/DnaA-independent DNA replication
fig|6666666.293769.peg.3441	54.4982	1.19575	0.338993	3.52737	0.000419709	0.00167039	DNA Metabolism	- none -	- none -	Type I restriction-modification system, specificity subunit S
fig|6666666.293769.peg.295	366.111	0.739027	0.214877	3.43931	0.000583204	0.00219769	DNA Metabolism	DNA repair	DNA repair, bacterial RecBCD pathway	Exodeoxyribonuclease V alpha chain (EC 3.1.11.5)
fig|6666666.293769.peg.2779	43.4728	1.65845	0.492027	3.37065	0.000749918	0.00274605	DNA Metabolism	DNA repair	DNA repair, bacterial	A/G-specific adenine glycosylase (EC 3.2.2.-)
fig|6666666.293769.peg.3219	100.044	1.35762	0.405671	3.34661	0.000818073	0.00296956	DNA Metabolism	- none -	- none -	Thermonuclease family protein
fig|6666666.293769.peg.740	54.9319	0.990682	0.297143	3.33402	0.000855995	0.00309526	DNA Metabolism	DNA repair	DNA repair, bacterial	Exodeoxyribonuclease III (EC 3.1.11.2)
fig|6666666.293769.peg.279	81.6012	1.33456	0.403753	3.30538	0.000948477	0.00338086	DNA Metabolism	DNA repair	DNA repair, bacterial RecFOR pathway	DNA recombination and repair protein RecO
fig|6666666.293769.peg.2082	842.62	0.934229	0.282742	3.30418	0.000952559	0.00338898	DNA Metabolism	DNA Metabolism - no subcategory	DNA structural proteins, bacterial	DNA-binding protein HU-beta
fig|6666666.293769.peg.1552	19.6529	1.81385	0.549523	3.30076	0.000964224	0.003424	DNA Metabolism	DNA Metabolism - no subcategory	Restriction-Modification System	Putative predicted metal-dependent hydrolase
fig|6666666.293769.peg.3058	48.2935	1.19092	0.366639	3.24821	0.00116132	0.00400649	DNA Metabolism	- none -	- none -	DNA polymerase, beta-like region
fig|6666666.293769.peg.297	284.957	0.577473	0.182209	3.16929	0.00152814	0.0049967	DNA Metabolism	DNA repair	DNA repair, bacterial RecBCD pathway	Exodeoxyribonuclease V gamma chain (EC 3.1.11.5)
fig|6666666.293769.peg.357	91.1498	1.11246	0.351382	3.16596	0.00154571	0.00504606	DNA Metabolism	- none -	- none -	Crossover junction endodeoxyribonuclease RuvC (EC 3.1.22.4)
fig|6666666.293769.peg.3871	4.61598	2.55181	0.814499	3.13298	0.00173042	0.00556133	DNA Metabolism	- none -	- none -	Type I restriction-modification system, specificity subunit S
fig|6666666.293769.peg.1244	66.1562	1.07948	0.344581	3.13272	0.00173195	0.0055615	DNA Metabolism	- none -	- none -	Type I restriction-modification system, specificity subunit S
fig|6666666.293769.peg.2696	65.6886	1.12218	0.358366	3.13139	0.00173981	0.00557718	DNA Metabolism	DNA repair	DNA repair, bacterial UvrD and related helicases	ATP-dependent DNA helicase Rep
fig|6666666.293769.peg.488	95.887	1.00776	0.323575	3.11447	0.00184276	0.00585809	DNA Metabolism	- none -	- none -	Uracil-DNA glycosylase, family 1 (EC 3.2.2.27)
fig|6666666.293769.peg.1615	64.9098	1.49628	0.484933	3.08554	0.00203185	0.00634553	DNA Metabolism	DNA repair	DNA repair, bacterial	Methyl-directed repair DNA adenine methylase (EC 2.1.1.72)
fig|6666666.293769.peg.3810	765.664	-0.592032	0.192065	-3.08245	0.00205303	0.00640104	DNA Metabolism	DNA Metabolism - no subcategory	Restriction-Modification System	Putative predicted metal-dependent hydrolase
fig|6666666.293769.peg.443	67.9138	1.36525	0.44344	3.07876	0.00207864	0.00646477	DNA Metabolism	DNA Metabolism - no subcategory	DNA structural proteins, bacterial	DNA-binding protein Fis
fig|6666666.293769.peg.700	75.4634	0.919438	0.305697	3.00768	0.00263254	0.00794414	DNA Metabolism	- none -	- none -	Site-specific tyrosine recombinase XerD
fig|6666666.293769.peg.3906	14.1437	1.75255	0.594339	2.94874	0.00319073	0.00945393	DNA Metabolism	DNA Metabolism - no subcategory	Restriction-Modification System	Type I restriction-modification system, restriction subunit R (EC 3.1.21.3)
fig|6666666.293769.peg.404	690.791	0.655173	0.224311	2.92083	0.00349102	0.0101672	DNA Metabolism	DNA replication	DNA topoisomerases, Type II, ATP-dependent	DNA gyrase subunit A (EC 5.99.1.3)
fig|6666666.293769.peg.513	80.8011	1.72408	0.615805	2.79972	0.00511473	0.0140161	DNA Metabolism	- none -	- none -	Predicted endonuclease distantly related to archaeal Holliday junction resolvase
fig|6666666.293769.peg.2664	173.519	0.885924	0.31734	2.79172	0.00524285	0.0142701	DNA Metabolism	- none -	- none -	Endonuclease/exonuclease/phosphatase family protein
fig|6666666.293769.peg.511	115.001	0.709904	0.254749	2.78668	0.0053251	0.014445	DNA Metabolism	- none -	- none -	DnaA initiator-associating protein DiaA
fig|6666666.293769.peg.844	338.848	0.52148	0.189184	2.75648	0.00584279	0.0155794	DNA Metabolism	DNA Metabolism - no subcategory	DNA structural proteins, bacterial	Chromosome partition protein smc
fig|6666666.293769.peg.1499	271.337	0.729408	0.272081	2.68085	0.00734346	0.0187811	DNA Metabolism	DNA repair	2-phosphoglycolate salvage	Similar to phosphoglycolate phosphatase, clustered with ribosomal large subunit pseudouridine synthase C
fig|6666666.293769.peg.1119	201.889	0.842286	0.315126	2.67285	0.0075209	0.0191566	DNA Metabolism	- none -	- none -	Single-stranded-DNA-specific exonuclease RecJ
fig|6666666.293769.peg.90	294.201	0.839011	0.321055	2.61329	0.00896744	0.0223265	DNA Metabolism	DNA repair	DNA repair, bacterial RecFOR pathway	Single-stranded DNA-binding protein
fig|6666666.293769.peg.1412	120.126	0.825094	0.325093	2.53802	0.011148	0.0269172	DNA Metabolism	DNA repair	DNA repair, bacterial RecFOR pathway	DNA recombination and repair protein RecF
fig|6666666.293769.peg.2752	29.9788	1.05792	0.418665	2.52689	0.0115076	0.0276964	DNA Metabolism	- none -	- none -	DNA internalization-related competence protein ComEC/Rec2
fig|6666666.293769.peg.1867	167.009	-1.352	0.548766	-2.46372	0.0137505	0.0320874	DNA Metabolism	- none -	- none -	ATPase involved in DNA repair
fig|6666666.293769.peg.1176	1410.81	-0.328475	0.134633	-2.43977	0.0146966	0.0339785	DNA Metabolism	DNA repair	DNA repair, bacterial RecFOR pathway	RecA protein
fig|6666666.293769.peg.1707	1499.45	-0.551745	0.228563	-2.41398	0.0157794	0.0359074	DNA Metabolism	- none -	- none -	Replicative DNA helicase (DnaB) (EC 3.6.4.12)
fig|6666666.293769.peg.761	218.742	0.588441	0.244906	2.40273	0.0162734	0.0367864	DNA Metabolism	DNA repair	DNA repair, bacterial	DNA repair protein RecN
fig|6666666.293769.peg.1580	480.962	0.471697	0.19765	2.38652	0.0170085	0.0381271	DNA Metabolism	- none -	- none -	DNA polymerase I (EC 2.7.7.7)
fig|6666666.293769.peg.2408	108.395	0.632896	0.266448	2.37531	0.0175344	0.0391891	DNA Metabolism	DNA repair	DNA repair, UvrABC system	Excinuclease ABC subunit C
fig|6666666.293769.peg.1652	451.083	0.406556	0.172151	2.36163	0.0181948	0.0402579	DNA Metabolism	DNA repair	DNA repair, bacterial RecFOR pathway	ATP-dependent DNA helicase RecQ
fig|6666666.293769.peg.3314	75.6243	0.601601	0.255063	2.35864	0.018342	0.0404882	DNA Metabolism	DNA Metabolism - no subcategory	Restriction-Modification System	Type I restriction-modification system, DNA-methyltransferase subunit M (EC 2.1.1.72)
fig|6666666.293769.peg.1052	68.9685	0.620955	0.263491	2.35664	0.018441	0.0406589	DNA Metabolism	- none -	- none -	Putative Holliday junction resolvase YqgF
fig|6666666.293769.peg.749	82.792	0.622657	0.271513	2.29328	0.0218317	0.0467893	DNA Metabolism	- none -	- none -	DNA polymerase III delta prime subunit (EC 2.7.7.7)
fig|6666666.293769.peg.976	8.71274	2.02607	0.893769	2.26689	0.0233972	0.0495789	DNA Metabolism	DNA Metabolism - no subcategory	Restriction-Modification System	Type I restriction-modification system, specificity subunit S (EC 3.1.21.3)
fig|6666666.293769.peg.2486	54.8266	2.07868	0.918404	2.26336	0.0236136	0.0499564	DNA Metabolism	- none -	- none -	Helicase, SNF2/RAD54 family
fig|6666666.293769.peg.1372	225.579	0.774951	0.343861	2.25368	0.0242165	0.0508561	DNA Metabolism	DNA Metabolism - no subcategory	DNA structural proteins, bacterial	Integration host factor beta subunit
fig|6666666.293769.peg.802	43.318	1.59023	0.713556	2.2286	0.0258407	0.0536966	DNA Metabolism	DNA repair	DNA repair, bacterial UmuCD system	Error-prone repair protein UmuD
fig|6666666.293769.peg.1967	165.888	-0.598622	0.269485	-2.22135	0.026327	0.0544809	DNA Metabolism	DNA uptake, competence	DNA processing cluster	DNA topoisomerase III (EC 5.99.1.2)
fig|6666666.293769.peg.345	460.781	-0.783109	0.358073	-2.18701	0.0287419	0.0586547	DNA Metabolism	- none -	- none -	DNA polymerase III, epsilon subunit-like protein
fig|6666666.293769.peg.2348	80.3416	0.885968	0.405946	2.18248	0.0290741	0.0592362	DNA Metabolism	DNA Metabolism - no subcategory	Restriction-Modification System	Type I restriction-modification system, DNA-methyltransferase subunit M (EC 2.1.1.72)
fig|6666666.293769.peg.2497	170.469	-0.498016	0.228908	-2.17562	0.0295839	0.0601769	DNA Metabolism	DNA repair	DNA repair, bacterial	Very-short-patch mismatch repair endonuclease (G-T specific)
fig|6666666.293769.peg.1846	52.1803	1.03068	0.478274	2.15499	0.0311626	0.0627764	DNA Metabolism	- none -	- none -	DNA-binding protein, CopG family
fig|6666666.293769.peg.4123	8.08538	2.23383	1.04173	2.14435	0.0320049	0.0641979	DNA Metabolism	- none -	- none -	Type I restriction-modification system, specificity subunit S
fig|6666666.293769.peg.152	306.536	0.556411	0.263476	2.11181	0.0347025	0.0688006	DNA Metabolism	- none -	- none -	ParA-like protein
fig|6666666.293769.peg.86	35.0248	0.827893	0.392878	2.10725	0.0350956	0.0694701	DNA Metabolism	DNA repair	DNA repair, bacterial	DNA mismatch repair endonuclease MutH
fig|6666666.293769.peg.1343	46.0463	1.06151	0.514286	2.06404	0.0390142	0.0761832	DNA Metabolism	- none -	- none -	DnaA inactivator Hda (shorter homolog of DnaA)
fig|6666666.293769.peg.1842	4.89903	2.20453	1.07368	2.05325	0.0400479	0.077717	DNA Metabolism	- none -	- none -	DEAD/DEAH box helicase-like protein
fig|6666666.293769.peg.797	211.033	0.644337	0.314557	2.04839	0.0405216	0.0784337	DNA Metabolism	DNA replication	DNA topoisomerases, Type II, ATP-dependent	Topoisomerase IV subunit B (EC 5.99.1.-)
fig|6666666.293769.peg.2808	41.2797	1.04819	0.515372	2.03385	0.0419668	0.0805668	DNA Metabolism	- none -	- none -	Type III restriction-modification system restriction subunit (EC 3.1.21.5)
fig|6666666.293769.peg.408	147.238	0.499394	0.251487	1.98577	0.0470591	0.0876989	DNA Metabolism	DNA repair	2-phosphoglycolate salvage	Similar to phosphoglycolate phosphatase, clustered with ubiquinone biosynthesis SAM-dependent O-methyltransferase
fig|6666666.293769.peg.1004	105.28	0.477597	0.244564	1.95285	0.0508377	0.0934885	DNA Metabolism	DNA repair	DNA repair, bacterial UmuCD system	Error-prone repair protein UmuD
fig|6666666.293769.peg.2692	22.276	0.91893	0.473321	1.94145	0.0522033	0.0953929	DNA Metabolism	DNA Metabolism - no subcategory	Restriction-Modification System	Type I restriction-modification system, DNA-methyltransferase subunit M (EC 2.1.1.72)
fig|6666666.293769.peg.2299	164.333	0.371108	0.193005	1.92279	0.0545063	0.0987845	DNA Metabolism	DNA repair	DNA repair system including RecA, MutS and a hypothetical protein	DNA mismatch repair protein MutS
fig|6666666.293769.peg.2847	14.1512	2.59469	1.3515	1.91985	0.0548764	0.0992637	DNA Metabolism	DNA Metabolism - no subcategory	Restriction-Modification System	Type III restriction-modification system methylation subunit (EC 2.1.1.72)
fig|6666666.293769.peg.1550	46.2	0.881361	0.464754	1.8964	0.0579067	0.103746	DNA Metabolism	DNA Metabolism - no subcategory	Restriction-Modification System	Type I restriction-modification system, restriction subunit R (EC 3.1.21.3)
fig|6666666.293769.peg.1243	94.906	0.836021	0.441319	1.89437	0.0581758	0.104178	DNA Metabolism	DNA Metabolism - no subcategory	Restriction-Modification System	Putative DNA-binding protein in cluster with Type I restriction-modification system
fig|6666666.293769.peg.2904	142.827	0.56557	0.304818	1.85543	0.0635344	0.112013	DNA Metabolism	- none -	- none -	Chromosome (plasmid) partitioning protein ParA
fig|6666666.293769.peg.2318	9.28933	2.67338	1.44492	1.8502	0.064285	0.112912	DNA Metabolism	- none -	- none -	Type I restriction-modification system, specificity subunit S
fig|6666666.293769.peg.4024	9.19856	1.06186	0.575696	1.84449	0.065112	0.114182	DNA Metabolism	DNA Metabolism - no subcategory	Restriction-Modification System	Type I restriction-modification system, DNA-methyltransferase subunit M (EC 2.1.1.72)
fig|6666666.293769.peg.1704	951.788	0.494889	0.273402	1.81012	0.0702776	0.121674	DNA Metabolism	- none -	CBSS-349161.4.peg.2417	DNA primase (EC 2.7.7.-)
fig|6666666.293769.peg.1525	415.094	-0.237152	0.132513	-1.78966	0.0735093	0.126338	DNA Metabolism	- none -	- none -	ATP-dependent helicase HrpA
fig|6666666.293769.peg.1013	527.006	0.495273	0.276824	1.78912	0.073595	0.126427	DNA Metabolism	CRISPs	CRISPRs	CRISPR-associated protein, Csy1 family
fig|6666666.293769.peg.2905	934.28	0.870282	0.490513	1.77423	0.0760256	0.130008	DNA Metabolism	- none -	- none -	Chromosome (plasmid) partitioning protein ParB
fig|6666666.293769.peg.1160	92.9446	-0.574912	0.326625	-1.76016	0.0783805	0.133695	DNA Metabolism	- none -	- none -	ParA-like protein
fig|6666666.293769.peg.1386	104.619	-0.440124	0.250544	-1.75667	0.0789738	0.134499	DNA Metabolism	- none -	- none -	Endonuclease III (EC 4.2.99.18)
fig|6666666.293769.peg.16	6.10009	-1.57387	0.901834	-1.74518	0.0809531	0.137372	DNA Metabolism	DNA repair	DNA repair, bacterial RecFOR pathway	Single-stranded DNA-binding protein
fig|6666666.293769.peg.3502	11.9782	-1.40308	0.80724	-1.73812	0.0821905	0.139095	DNA Metabolism	- none -	- none -	Adenine-specific DNA methylase
fig|6666666.293769.peg.3857	31.5435	0.773609	0.452999	1.70775	0.087683	0.146934	DNA Metabolism	DNA Metabolism - no subcategory	Restriction-Modification System	Type I restriction-modification system, restriction subunit R (EC 3.1.21.3)
fig|6666666.293769.peg.2496	142.809	0.351884	0.208035	1.69146	0.0907488	0.15106	DNA Metabolism	- none -	- none -	Type II restriction endonuclease
fig|6666666.293769.peg.2659	72.3134	0.573679	0.340097	1.68681	0.0916399	0.152476	DNA Metabolism	DNA Metabolism - no subcategory	Restriction-Modification System	Putative predicted metal-dependent hydrolase
fig|6666666.293769.peg.1516	111.166	0.49574	0.29622	1.67355	0.0942187	0.155801	DNA Metabolism	DNA repair	DNA repair, bacterial	Exodeoxyribonuclease VII small subunit (EC 3.1.11.6)
fig|6666666.293769.peg.1245	68.8963	0.867645	0.523038	1.65886	0.0971448	0.159447	DNA Metabolism	DNA Metabolism - no subcategory	Restriction-Modification System	Type I restriction-modification system, DNA-methyltransferase subunit M (EC 2.1.1.72)
fig|6666666.293769.peg.2281	108.915	0.476847	0.288679	1.65182	0.0985706	0.161083	DNA Metabolism	- none -	- none -	DNA gyrase inhibitor YacG
fig|6666666.293769.peg.2038	23.1921	1.70173	1.03356	1.64647	0.0996661	0.162168	DNA Metabolism	- none -	- none -	Mrr restriction system protein
fig|6666666.293769.peg.2498	177.578	0.322854	0.19635	1.64427	0.10012	0.162567	DNA Metabolism	DNA repair	DNA repair, bacterial	DNA-cytosine methyltransferase (EC 2.1.1.37)
fig|6666666.293769.peg.603	179.72	0.338707	0.207866	1.62945	0.103217	0.166432	DNA Metabolism	- none -	- none -	Site-specific tyrosine recombinase XerC
fig|6666666.293769.peg.3815	6.07064	2.89442	1.80407	1.60438	0.10863	0.173747	DNA Metabolism	- none -	- none -	Anticodon nuclease
fig|6666666.293769.peg.946	371.743	-0.422598	0.265675	-1.59066	0.111687	0.177649	DNA Metabolism	- none -	- none -	ATP-dependent DNA helicase UvrD/PcrA (EC 3.6.4.12)
fig|6666666.293769.peg.846	173.848	0.299864	0.19391	1.54641	0.122005	0.189883	DNA Metabolism	- none -	- none -	DNA ligase (NAD(+)) (EC 6.5.1.2)
fig|6666666.293769.peg.1633	142.652	0.533692	0.348157	1.53291	0.125299	0.194283	DNA Metabolism	DNA replication	DNA topoisomerases, Type I, ATP-independent	DNA topoisomerase I (EC 5.99.1.2)
fig|6666666.293769.peg.1551	3.97007	1.54817	1.01081	1.53161	0.125618	0.194537	DNA Metabolism	DNA Metabolism - no subcategory	Restriction-Modification System	Type I restriction-modification system, restriction subunit R (EC 3.1.21.3)
fig|6666666.293769.peg.1875	70.6963	0.508863	0.332979	1.52821	0.126459	0.195679	DNA Metabolism	- none -	CBSS-228410.1.peg.134; <br>CBSS-342610.3.peg.1536	DNA polymerase III epsilon subunit (EC 2.7.7.7)
fig|6666666.293769.peg.340	651.3	1.03836	0.679739	1.52758	0.126616	0.195821	DNA Metabolism	DNA repair	DNA repair, bacterial UmuCD system	Error-prone, lesion bypass DNA polymerase V (UmuC)
fig|6666666.293769.peg.2663	332.444	0.460844	0.316966	1.45392	0.145967	0.218834	DNA Metabolism	DNA repair	DNA repair, bacterial UmuCD system	SOS-response repressor and protease LexA (EC 3.4.21.88)
fig|6666666.293769.peg.3207	35.2974	0.752508	0.520975	1.44442	0.14862	0.22219	DNA Metabolism	DNA Metabolism - no subcategory	Restriction-Modification System	Type I restriction-modification system, restriction subunit R (EC 3.1.21.3)
fig|6666666.293769.peg.3677	31.8794	0.717726	0.501118	1.43225	0.152072	0.226361	DNA Metabolism	DNA Metabolism - no subcategory	Restriction-Modification System	Type I restriction-modification system, restriction subunit R (EC 3.1.21.3)
fig|6666666.293769.peg.2658	112.089	0.322904	0.229477	1.40713	0.159389	0.235387	DNA Metabolism	DNA Metabolism - no subcategory	Restriction-Modification System	Type I restriction-modification system, restriction subunit R (EC 3.1.21.3)
fig|6666666.293769.peg.1011	373.716	0.443098	0.321189	1.37955	0.167724	0.24519	DNA Metabolism	CRISPs	CRISPRs	CRISPR-associated protein, Csy3 family
fig|6666666.293769.peg.1321	36.9814	0.507401	0.36901	1.37503	0.169122	0.246801	DNA Metabolism	- none -	- none -	Exodeoxyribonuclease I (EC 3.1.11.1)
fig|6666666.293769.peg.2132	4.38741	1.19904	0.872213	1.37471	0.16922	0.246801	DNA Metabolism	- none -	CBSS-272943.3.peg.1367	Rossmann fold nucleotide-binding protein Smf possibly involved in DNA uptake
fig|6666666.293769.peg.2399	140.484	-1.00955	0.735675	-1.37228	0.169976	0.24745	DNA Metabolism	DNA Metabolism - no subcategory	DNA phosphorothioation	DNA sulfur modification protein DndD
fig|6666666.293769.peg.2289	60.7677	0.514274	0.399905	1.28599	0.198446	0.282946	DNA Metabolism	- none -	- none -	DNA polymerase, beta-like region
fig|6666666.293769.peg.1465	36.5547	0.407085	0.320836	1.26883	0.204503	0.290808	DNA Metabolism	- none -	- none -	Formamidopyrimidine-DNA glycosylase (EC 3.2.2.23)
fig|6666666.293769.peg.3834	15.4963	1.13998	0.901272	1.26486	0.205923	0.292275	DNA Metabolism	DNA Metabolism - no subcategory	Restriction-Modification System	Type I restriction-modification system, restriction subunit R (EC 3.1.21.3)
fig|6666666.293769.peg.1445	31.6385	1.47329	1.17584	1.25297	0.210216	0.297134	DNA Metabolism	- none -	- none -	Superfamily II DNA and RNA helicase
fig|6666666.293769.peg.4065	34.5267	0.681211	0.558658	1.21937	0.222704	0.31162	DNA Metabolism	DNA Metabolism - no subcategory	Restriction-Modification System	Type I restriction-modification system, restriction subunit R (EC 3.1.21.3)
fig|6666666.293769.peg.718	340.368	-0.363245	0.304022	-1.1948	0.232166	0.322576	DNA Metabolism	DNA repair	DNA repair, bacterial	Exonuclease SbcC
fig|6666666.293769.peg.2693	22.5606	0.546719	0.4623	1.18261	0.236966	0.328032	DNA Metabolism	DNA Metabolism - no subcategory	Restriction-Modification System	Type I restriction-modification system, DNA-methyltransferase subunit M (EC 2.1.1.72)
fig|6666666.293769.peg.1246	113.119	0.655826	0.558377	1.17452	0.240186	0.331513	DNA Metabolism	DNA Metabolism - no subcategory	Restriction-Modification System	Type I restriction-modification system, DNA-methyltransferase subunit M (EC 2.1.1.72)
fig|6666666.293769.peg.1841	5.9062	0.848489	0.730836	1.16098	0.245649	0.337318	DNA Metabolism	- none -	- none -	DEAD/DEAH box helicase-like protein
fig|6666666.293769.peg.2801	66.5028	-0.961472	0.831344	-1.15653	0.247465	0.339511	DNA Metabolism	DNA Metabolism - no subcategory	DNA phosphorothioation	3'-phosphoadenosine 5'-phosphosulfate sulfurtransferase DndC
fig|6666666.293769.peg.1062	287.877	0.254132	0.22241	1.14263	0.253193	0.345908	DNA Metabolism	DNA Metabolism - no subcategory	DNA structural proteins, bacterial	Integration host factor alpha subunit
fig|6666666.293769.peg.211	449.332	0.195052	0.171155	1.13962	0.254443	0.347362	DNA Metabolism	DNA repair	DNA repair, bacterial MutL-MutS system	DNA mismatch repair protein MutL
fig|6666666.293769.peg.296	183.916	0.24829	0.221629	1.1203	0.262587	0.355638	DNA Metabolism	DNA repair	DNA repair, bacterial RecBCD pathway	Exodeoxyribonuclease V beta chain (EC 3.1.11.5)
fig|6666666.293769.peg.1869	124.498	-0.870115	0.795126	-1.09431	0.273819	0.366882	DNA Metabolism	- none -	- none -	DNA repair helicase
fig|6666666.293769.peg.6	8.42545	-0.719602	0.70208	-1.02496	0.305383	0.400602	DNA Metabolism	- none -	- none -	putative primase
fig|6666666.293769.peg.1084	585.741	0.186869	0.186816	1.00028	0.317173	0.413596	DNA Metabolism	DNA repair	DNA repair, bacterial RecFOR pathway	ATP-dependent DNA helicase RecQ
fig|6666666.293769.peg.92	220.604	0.224807	0.233596	0.962377	0.33586	0.432749	DNA Metabolism	DNA repair	DNA repair, UvrABC system	Excinuclease ABC subunit A
fig|6666666.293769.peg.1981	131.609	0.611754	0.635997	0.961882	0.336109	0.432749	DNA Metabolism	- none -	- none -	Type II R/M system (EC 2.1.1.72)
fig|6666666.293769.peg.2648	57.1284	-0.469854	0.493915	-0.951284	0.34146	0.438287	DNA Metabolism	DNA repair	DNA repair, bacterial	Exonuclease SbcC
fig|6666666.293769.peg.1196	272.186	0.143436	0.153301	0.93565	0.349454	0.446868	DNA Metabolism	- none -	- none -	DNA polymerase III delta subunit (EC 2.7.7.7)
fig|6666666.293769.peg.3577	25.7507	0.804241	0.933426	0.861602	0.388907	0.488506	DNA Metabolism	DNA Metabolism - no subcategory	Restriction-Modification System	Type I restriction-modification system, restriction subunit R (EC 3.1.21.3)
fig|6666666.293769.peg.3391	12.7043	0.924953	1.09214	0.846915	0.397042	0.496733	DNA Metabolism	DNA Metabolism - no subcategory	Restriction-Modification System	Type III restriction-modification system methylation subunit (EC 2.1.1.72)
fig|6666666.293769.peg.2848	19.0788	1.14083	1.34773	0.846483	0.397283	0.496868	DNA Metabolism	- none -	- none -	Type III restriction-modification enzyme helicase subunit
fig|6666666.293769.peg.914	87.1587	0.236073	0.284051	0.831092	0.405922	0.50582	DNA Metabolism	DNA repair	DNA repair, bacterial	Exodeoxyribonuclease VII large subunit (EC 3.1.11.6)
fig|6666666.293769.peg.1562	84.7747	0.197066	0.24032	0.820012	0.412209	0.512296	DNA Metabolism	- none -	- none -	D-aminoacyl-tRNA deacylase (EC 3.1.1.96)
fig|6666666.293769.peg.1414	290.321	-0.188682	0.232627	-0.811091	0.417313	0.517441	DNA Metabolism	- none -	DNA replication cluster 1	Chromosomal replication initiator protein DnaA
fig|6666666.293769.peg.4183	5.7831	0.790314	0.980552	0.805989	0.420249	0.52019	DNA Metabolism	- none -	- none -	Type I restriction-modification system, specificity subunit S
fig|6666666.293769.peg.630	77.3549	-0.575177	0.722901	-0.795651	0.426235	0.525554	DNA Metabolism	- none -	- none -	DNA internalization-related competence protein ComEC/Rec2
fig|6666666.293769.peg.1673	15.6178	0.358463	0.464511	0.7717	0.440292	0.539699	DNA Metabolism	- none -	- none -	Site specific recombinase, phage integrase
fig|6666666.293769.peg.2209	364.376	0.146471	0.194273	0.753946	0.450882	0.549453	DNA Metabolism	DNA replication	DNA topoisomerases, Type II, ATP-dependent	Topoisomerase IV subunit A (EC 5.99.1.-)
fig|6666666.293769.peg.2802	58.9709	-0.561498	0.747067	-0.751604	0.452289	0.550989	DNA Metabolism	DNA Metabolism - no subcategory	DNA phosphorothioation	DNA sulfur modification protein DndB
fig|6666666.293769.peg.3673	171.639	0.230144	0.306747	0.750272	0.453091	0.551545	DNA Metabolism	DNA Metabolism - no subcategory	Restriction-Modification System	Putative predicted metal-dependent hydrolase
fig|6666666.293769.peg.2624	278.265	0.209059	0.284378	0.735143	0.462252	0.560901	DNA Metabolism	DNA repair	DNA repair, bacterial	A/G-specific adenine glycosylase (EC 3.2.2.-)
fig|6666666.293769.peg.3380	47.2006	0.408955	0.559113	0.731435	0.464514	0.563142	DNA Metabolism	DNA Metabolism - no subcategory	Restriction-Modification System	Type I restriction-modification system, restriction subunit R (EC 3.1.21.3)
fig|6666666.293769.peg.542	18.787	-0.46001	0.64864	-0.709191	0.478206	0.576618	DNA Metabolism	DNA Metabolism - no subcategory	Restriction-Modification System	Type I restriction-modification system, restriction subunit R (EC 3.1.21.3)
fig|6666666.293769.peg.49	39.9826	0.353608	0.529325	0.668035	0.504111	0.600871	DNA Metabolism	DNA Metabolism - no subcategory	Restriction-Modification System	Type I restriction-modification system, restriction subunit R (EC 3.1.21.3)
fig|6666666.293769.peg.1014	983.937	0.177617	0.270492	0.656644	0.51141	0.608006	DNA Metabolism	CRISPs	CRISPRs	CRISPR-associated helicase Cas3
fig|6666666.293769.peg.3847	4.01843	-0.492925	0.75115	-0.656227	0.511678	0.608006	DNA Metabolism	- none -	CBSS-349161.4.peg.2417	DNA primase (EC 2.7.7.-)
fig|6666666.293769.peg.89	674.794	-0.458109	0.722644	-0.633935	0.526123	0.622369	DNA Metabolism	- none -	- none -	putative site specific recombinase
fig|6666666.293769.peg.1840	2.66035	0.67334	1.18678	0.567366	0.570466	0.661706	DNA Metabolism	- none -	- none -	DEAD/DEAH box helicase-like protein
fig|6666666.293769.peg.3091	207.262	0.106904	0.19701	0.542632	0.587383	0.67818	DNA Metabolism	- none -	- none -	Nucleoid-associated protein YaaK
fig|6666666.293769.peg.341	725.43	0.361337	0.66851	0.540511	0.588845	0.679033	DNA Metabolism	DNA repair	DNA repair, bacterial UmuCD system	Error-prone repair protein UmuD
fig|6666666.293769.peg.1112	270.386	-0.122738	0.233007	-0.526756	0.598363	0.687534	DNA Metabolism	- none -	- none -	Replication-associated recombination protein RarA
fig|6666666.293769.peg.1843	11.6046	-0.272738	0.525312	-0.519193	0.603626	0.691757	DNA Metabolism	- none -	- none -	DEAD/DEAH box helicase-like protein
fig|6666666.293769.peg.541	341.414	-0.12749	0.246739	-0.5167	0.605366	0.692844	DNA Metabolism	- none -	- none -	Superfamily I DNA and RNA helicases
fig|6666666.293769.peg.2015	73.039	-0.199513	0.425264	-0.469152	0.638961	0.720894	DNA Metabolism	- none -	- none -	Mrr restriction system protein
fig|6666666.293769.peg.2607	24.8661	-0.172519	0.370724	-0.465358	0.641675	0.723304	DNA Metabolism	- none -	DNA replication cluster 1	Ribosome-associated heat shock protein implicated in the recycling of the 50S subunit (S4 paralog)
fig|6666666.293769.peg.3178	37.9587	0.77322	1.68973	0.4576	0.64724	0.728496	DNA Metabolism	- none -	- none -	Type III restriction enzyme, res subunit:DEAD/DEAH box helicase, N-terminal
fig|6666666.293769.peg.3344	12.0634	0.31036	0.683378	0.454155	0.649717	0.730834	DNA Metabolism	- none -	- none -	Type I restriction-modification system, specificity subunit S
fig|6666666.293769.peg.3868	33.9433	0.134453	0.319073	0.421387	0.673473	0.751258	DNA Metabolism	- none -	- none -	Type I restriction-modification system, specificity subunit S
fig|6666666.293769.peg.1010	189.58	-0.120154	0.286882	-0.418828	0.675342	0.752673	DNA Metabolism	CRISPs	CRISPRs	CRISPR-associated protein, Csy4 family
fig|6666666.293769.peg.2714	27.0013	-0.708298	1.71646	-0.412649	0.679864	0.757038	DNA Metabolism	- none -	- none -	Type III restriction enzyme, res subunit:DEAD/DEAH box helicase, N-terminal
fig|6666666.293769.peg.1439	223.89	-0.0935307	0.229435	-0.407657	0.683526	0.759316	DNA Metabolism	- none -	- none -	Adenine-specific DNA methylase containing a Zn-ribbon
fig|6666666.293769.peg.2817	28.2844	0.197416	0.512605	0.385122	0.700147	0.772073	DNA Metabolism	DNA repair	DNA repair, bacterial	Exonuclease SbcC
fig|6666666.293769.peg.3744	1.84118	0.917753	2.49361	0.368043	0.712841	0.783312	DNA Metabolism	- none -	- none -	Anticodon nuclease
fig|6666666.293769.peg.1413	243.609	-0.0623846	0.17118	-0.364438	0.715531	0.785349	DNA Metabolism	- none -	DNA replication cluster 1	DNA polymerase III beta subunit (EC 2.7.7.7)
fig|6666666.293769.peg.636	154.239	-0.0913826	0.263053	-0.347392	0.728297	0.795179	DNA Metabolism	DNA Metabolism - no subcategory	Restriction-Modification System	Type I restriction-modification system, restriction subunit R (EC 3.1.21.3)
fig|6666666.293769.peg.2736	179.867	0.083354	0.250135	0.333236	0.738956	0.803837	DNA Metabolism	- none -	- none -	Histone-like bacterial DNA-binding protein
fig|6666666.293769.peg.3339	20.0213	0.317967	1.04982	0.302878	0.761983	0.822872	DNA Metabolism	DNA Metabolism - no subcategory	Restriction-Modification System	Type I restriction-modification system, restriction subunit R (EC 3.1.21.3)
fig|6666666.293769.peg.1940	402.06	-0.0461801	0.156002	-0.296023	0.767213	0.828043	DNA Metabolism	- none -	- none -	DNA/RNA helicases, SNF2 family
fig|6666666.293769.peg.1148	468.504	0.0633903	0.221555	0.286115	0.77479	0.834304	DNA Metabolism	- none -	- none -	DNA polymerase II (EC 2.7.7.7)
fig|6666666.293769.peg.958	251.929	-0.0593335	0.207652	-0.285735	0.775081	0.834372	DNA Metabolism	- none -	- none -	ATP-dependent DNA helicase RecG (EC 3.6.4.12)
fig|6666666.293769.peg.974	41.908	-0.159247	0.566536	-0.281089	0.778642	0.836534	DNA Metabolism	- none -	- none -	RlgA
fig|6666666.293769.peg.2297	63.5084	0.0789865	0.291359	0.271097	0.786316	0.843332	DNA Metabolism	DNA repair	DNA repair, UvrABC system	Excinuclease ABC subunit B
fig|6666666.293769.peg.913	51.571	0.06633	0.251507	0.26373	0.791988	0.846996	DNA Metabolism	- none -	- none -	DNA-3-methyladenine glycosylase II (EC 3.2.2.21)
fig|6666666.293769.peg.639	59.4473	0.0686449	0.326447	0.210279	0.83345	0.8818	DNA Metabolism	DNA Metabolism - no subcategory	Restriction-Modification System	Type I restriction-modification system, DNA-methyltransferase subunit M (EC 2.1.1.72)
fig|6666666.293769.peg.445	389.958	0.0531823	0.259601	0.204862	0.83768	0.88478	DNA Metabolism	DNA replication	DNA topoisomerases, Type II, ATP-dependent	DNA gyrase subunit A (EC 5.99.1.3)
fig|6666666.293769.peg.2818	40.1805	-0.136777	0.673394	-0.203116	0.839045	0.885532	DNA Metabolism	- none -	- none -	modification methylase
fig|6666666.293769.peg.2254	14.8394	0.116615	0.585058	0.199322	0.842011	0.887523	DNA Metabolism	DNA Metabolism - no subcategory	Restriction-Modification System	Type I restriction-modification system, DNA-methyltransferase subunit M (EC 2.1.1.72)
fig|6666666.293769.peg.4003	4.8937	-0.275845	1.47544	-0.186958	0.851694	0.894457	DNA Metabolism	- none -	- none -	putative site specific recombinase
fig|6666666.293769.peg.973	101.722	-0.0472997	0.313641	-0.150809	0.880127	0.91851	DNA Metabolism	DNA repair	DNA repair, bacterial RecBCD pathway	RecD-like DNA helicase YrrC
fig|6666666.293769.peg.637	78.8983	-0.0668151	0.452358	-0.147704	0.882576	0.9203	DNA Metabolism	- none -	- none -	Type I restriction-modification system, specificity subunit S
fig|6666666.293769.peg.3041	22.0015	-0.127764	0.872752	-0.146392	0.883612	0.920868	DNA Metabolism	DNA Metabolism - no subcategory	Restriction-Modification System	Type I restriction-modification system, restriction subunit R (EC 3.1.21.3)
fig|6666666.293769.peg.1411	802.596	-0.0287386	0.207069	-0.138788	0.889618	0.925075	DNA Metabolism	DNA replication	DNA topoisomerases, Type II, ATP-dependent	DNA gyrase subunit B (EC 5.99.1.3)
fig|6666666.293769.peg.975	74.6652	-0.0717574	0.567335	-0.126481	0.899351	0.932846	DNA Metabolism	DNA Metabolism - no subcategory	Restriction-Modification System	Type I restriction-modification system, DNA-methyltransferase subunit M (EC 2.1.1.72)
fig|6666666.293769.peg.3618	47.5084	0.414949	4.08089	0.101681	0.91901	0.945604	DNA Metabolism	- none -	- none -	Type III restriction enzyme, res subunit:DEAD/DEAH box helicase, N-terminal
fig|6666666.293769.peg.1549	54.2767	0.0452161	0.445606	0.101471	0.919177	0.945604	DNA Metabolism	DNA Metabolism - no subcategory	Restriction-Modification System	Type I restriction-modification system, restriction subunit R (EC 3.1.21.3)
fig|6666666.293769.peg.2253	35.8077	0.0529899	0.531274	0.099741	0.92055	0.946758	DNA Metabolism	- none -	- none -	Type I restriction-modification system, specificity subunit S
fig|6666666.293769.peg.2709	212.807	-0.401656	4.07093	-0.0986646	0.921405	0.947118	DNA Metabolism	DNA Metabolism - no subcategory	Restriction-Modification System	Type III restriction-modification system methylation subunit (EC 2.1.1.72)
fig|6666666.293769.peg.1015	466.099	-0.028769	0.30628	-0.0939303	0.925165	0.949684	DNA Metabolism	CRISPs	CRISPRs	CRISPR-associated protein Cas1
fig|6666666.293769.peg.4126	76.921	-0.0472482	0.509929	-0.0926563	0.926177	0.950463	DNA Metabolism	DNA Metabolism - no subcategory	Restriction-Modification System	Type I restriction-modification system, restriction subunit R (EC 3.1.21.3)
fig|6666666.293769.peg.719	76.3623	0.0290296	0.320372	0.0906122	0.927801	0.95135	DNA Metabolism	DNA repair	DNA repair, bacterial	Exonuclease SbcD
fig|6666666.293769.peg.2398	34.7871	-0.0688264	0.958849	-0.0717802	0.942777	0.961135	DNA Metabolism	DNA Metabolism - no subcategory	DNA phosphorothioation	3'-phosphoadenosine 5'-phosphosulfate sulfurtransferase DndC
fig|6666666.293769.peg.1012	244.739	-0.0142854	0.307958	-0.0463876	0.963001	0.976381	DNA Metabolism	CRISPs	CRISPRs	CRISPR-associated protein, Csy2 family
fig|6666666.293769.peg.3842	41.2222	-0.0200226	0.541651	-0.0369659	0.970512	0.980956	DNA Metabolism	DNA Metabolism - no subcategory	Restriction-Modification System	Type I restriction-modification system, restriction subunit R (EC 3.1.21.3)
fig|6666666.293769.peg.3663	29.88	-0.0213054	0.683571	-0.0311678	0.975136	0.984305	DNA Metabolism	- none -	- none -	Type I restriction-modification system, specificity subunit S
fig|6666666.293769.peg.755	422.119	1.86273	0.321506	5.79378	6.88208e-09	2.84132e-07	Fatty Acids, Lipids, and Isoprenoids	Fatty acids	Fatty Acid Biosynthesis FASII	Acyl carrier protein
fig|6666666.293769.peg.2824	171.022	2.47346	0.42806	5.77829	7.54614e-09	3.05763e-07	Fatty Acids, Lipids, and Isoprenoids	Isoprenoids	Polyprenyl Diphosphate Biosynthesis	Octaprenyl diphosphate synthase (EC 2.5.1.90)
fig|6666666.293769.peg.2621	277.509	0.95153	0.180687	5.26616	1.39304e-07	2.43425e-06	Fatty Acids, Lipids, and Isoprenoids	- none -	- none -	Lipoyl synthase (EC 2.8.1.8)
fig|6666666.293769.peg.754	472.277	1.43683	0.289795	4.95809	7.11904e-07	8.65574e-06	Fatty Acids, Lipids, and Isoprenoids	- none -	- none -	3-oxoacyl-[acyl-carrier-protein] synthase, KASII (EC 2.3.1.179)
fig|6666666.293769.peg.274	275.502	1.90321	0.389253	4.88939	1.0115e-06	1.14181e-05	Fatty Acids, Lipids, and Isoprenoids	- none -	- none -	Phosphate:acyl-ACP acyltransferase PlsX (EC 2.3.1.n2)
fig|6666666.293769.peg.1364	306.085	1.41523	0.32928	4.29797	1.72373e-05	0.000116686	Fatty Acids, Lipids, and Isoprenoids	Fatty acids	Fatty Acid Biosynthesis FASII	Enoyl-[acyl-carrier-protein] reductase [NADH] (EC 1.3.1.9)
fig|6666666.293769.peg.66	92.6384	2.08593	0.486404	4.28847	1.79909e-05	0.0001207	Fatty Acids, Lipids, and Isoprenoids	Isoprenoids	Polyprenyl Diphosphate Biosynthesis	Undecaprenyl diphosphate synthase (EC 2.5.1.31)
fig|6666666.293769.peg.419	115.801	1.44875	0.343531	4.21723	2.4732e-05	0.000158293	Fatty Acids, Lipids, and Isoprenoids	Isoprenoids	Nonmevalonate Branch of Isoprenoid Biosynthesis	4-diphosphocytidyl-2-C-methyl-D-erythritol kinase (EC 2.7.1.148)
fig|6666666.293769.peg.1173	171.9	-0.984066	0.256601	-3.83501	0.000125559	0.000623721	Fatty Acids, Lipids, and Isoprenoids	- none -	CBSS-176299.4.peg.1996A	Glycerophosphoryl diester phosphodiesterase (EC 3.1.4.46)
fig|6666666.293769.peg.1049	15.8813	2.17911	0.587247	3.71072	0.000206667	0.000953181	Fatty Acids, Lipids, and Isoprenoids	Isoprenoids	Polyprenyl Diphosphate Biosynthesis	Heptaprenyl diphosphate synthase component I (EC 2.5.1.30)
fig|6666666.293769.peg.3430	50.6373	1.17468	0.401997	2.92211	0.00347669	0.0101334	Fatty Acids, Lipids, and Isoprenoids	- none -	- none -	Squalene synthase (EC 2.5.1.21)
fig|6666666.293769.peg.2438	26.3281	0.936133	0.321992	2.90732	0.00364544	0.0105191	Fatty Acids, Lipids, and Isoprenoids	- none -	- none -	Squalene/phytoene desaturase HopC
fig|6666666.293769.peg.67	128.772	0.987492	0.345324	2.85961	0.00424168	0.0119371	Fatty Acids, Lipids, and Isoprenoids	- none -	- none -	Phosphatidate cytidylyltransferase (EC 2.7.7.41)
fig|6666666.293769.peg.1811	25.0012	1.12008	0.408315	2.74318	0.00608474	0.0161102	Fatty Acids, Lipids, and Isoprenoids	- none -	- none -	Acyl-CoA:1-acyl-sn-glycerol-3-phosphate acyltransferase (EC 2.3.1.51)
fig|6666666.293769.peg.1829	716.954	-0.383317	0.154426	-2.48221	0.0130569	0.0307553	Fatty Acids, Lipids, and Isoprenoids	Fatty acids	Fatty Acid Biosynthesis FASII	3-oxoacyl-[acyl-carrier-protein] synthase, KASI (EC 2.3.1.41)
fig|6666666.293769.peg.1233	102.291	-0.634381	0.265881	-2.38596	0.0170348	0.0381632	Fatty Acids, Lipids, and Isoprenoids	Isoprenoids	Nonmevalonate Branch of Isoprenoid Biosynthesis	2-C-methyl-D-erythritol 4-phosphate cytidylyltransferase (EC 2.7.7.60)
fig|6666666.293769.peg.1495	829.207	0.553414	0.243401	2.27367	0.0229858	0.0488724	Fatty Acids, Lipids, and Isoprenoids	Isoprenoids	Nonmevalonate Branch of Isoprenoid Biosynthesis	1-deoxy-D-xylulose 5-phosphate synthase (EC 2.2.1.7)
fig|6666666.293769.peg.3157	792.428	-0.530114	0.235829	-2.24788	0.0245841	0.0514258	Fatty Acids, Lipids, and Isoprenoids	Fatty acids	Fatty Acid Biosynthesis FASII	3-hydroxyacyl-[acyl-carrier-protein] dehydratase, FabA form (EC 4.2.1.59)
fig|6666666.293769.peg.2039	15.2876	2.42132	1.10682	2.18764	0.0286956	0.0585921	Fatty Acids, Lipids, and Isoprenoids	- none -	- none -	Patatin
fig|6666666.293769.peg.756	319.547	0.690057	0.320316	2.1543	0.0312166	0.0628514	Fatty Acids, Lipids, and Isoprenoids	Fatty acids	Fatty Acid Biosynthesis FASII	3-oxoacyl-[acyl-carrier protein] reductase (EC 1.1.1.100)
fig|6666666.293769.peg.68	156.143	0.569583	0.285926	1.99207	0.0463638	0.086828	Fatty Acids, Lipids, and Isoprenoids	Isoprenoids	Nonmevalonate Branch of Isoprenoid Biosynthesis	1-deoxy-D-xylulose 5-phosphate reductoisomerase (EC 1.1.1.267)
fig|6666666.293769.peg.757	451.752	0.425525	0.222712	1.91065	0.0560492	0.100832	Fatty Acids, Lipids, and Isoprenoids	Fatty acids	Fatty Acid Biosynthesis FASII	Malonyl CoA-acyl carrier protein transacylase (EC 2.3.1.39)
fig|6666666.293769.peg.308	535.219	-0.308594	0.169942	-1.81587	0.0693897	0.120414	Fatty Acids, Lipids, and Isoprenoids	Fatty acids	Fatty Acid Biosynthesis FASII	Acetyl-coenzyme A carboxyl transferase beta chain (EC 6.4.1.2)
fig|6666666.293769.peg.2227	142.36	0.401629	0.259752	1.5462	0.122057	0.189883	Fatty Acids, Lipids, and Isoprenoids	- none -	- none -	Short-chain dehydrogenase
fig|6666666.293769.peg.79	706.453	-0.323676	0.230737	-1.40279	0.160678	0.23664	Fatty Acids, Lipids, and Isoprenoids	Fatty acids	Fatty Acid Biosynthesis FASII	Acetyl-coenzyme A carboxyl transferase alpha chain (EC 6.4.1.2)
fig|6666666.293769.peg.792	170.639	0.443267	0.325036	1.36375	0.172647	0.250923	Fatty Acids, Lipids, and Isoprenoids	- none -	- none -	Oxidoreductase, short-chain dehydrogenase/reductase family
fig|6666666.293769.peg.1234	27.2564	0.79654	0.590647	1.34859	0.177469	0.25664	Fatty Acids, Lipids, and Isoprenoids	Isoprenoids	Nonmevalonate Branch of Isoprenoid Biosynthesis	2-C-methyl-D-erythritol 2,4-cyclodiphosphate synthase (EC 4.6.1.12)
fig|6666666.293769.peg.3747	149.491	-0.256673	0.199954	-1.28366	0.19926	0.28389	Fatty Acids, Lipids, and Isoprenoids	- none -	- none -	Acyl-CoA:1-acyl-sn-glycerol-3-phosphate acyltransferase (EC 2.3.1.51)
fig|6666666.293769.peg.794	726.811	0.482738	0.432342	1.11656	0.264181	0.357024	Fatty Acids, Lipids, and Isoprenoids	- none -	- none -	long-chain acyl-CoA synthetase
fig|6666666.293769.peg.2786	79.0827	0.3321	0.335639	0.989457	0.32244	0.418882	Fatty Acids, Lipids, and Isoprenoids	- none -	- none -	(E)-4-hydroxy-3-methylbut-2-enyl-diphosphate synthase (flavodoxin) (EC 1.17.7.3)
fig|6666666.293769.peg.758	920.859	0.182527	0.188427	0.968688	0.332701	0.429982	Fatty Acids, Lipids, and Isoprenoids	- none -	- none -	3-oxoacyl-[acyl-carrier-protein] synthase, KASIII (EC 2.3.1.180)
fig|6666666.293769.peg.1515	132.892	0.1701	0.190552	0.892672	0.372033	0.470457	Fatty Acids, Lipids, and Isoprenoids	Isoprenoids	Isoprenoid Biosynthesis: Interconversions	(2E,6E)-farnesyl diphosphate synthase (EC 2.5.1.10)
fig|6666666.293769.peg.2277	107.322	0.214566	0.249236	0.860894	0.389297	0.488506	Fatty Acids, Lipids, and Isoprenoids	- none -	- none -	4-hydroxy-3-methylbut-2-enyl diphosphate reductase (EC 1.17.7.4)
fig|6666666.293769.peg.447	465.251	-0.166582	0.276179	-0.603165	0.546399	0.639907	Fatty Acids, Lipids, and Isoprenoids	Fatty acids	Fatty Acid Biosynthesis FASII	Biotin carboxylase of acetyl-CoA carboxylase (EC 6.3.4.14)
fig|6666666.293769.peg.1804	36.797	-0.183639	0.367484	-0.49972	0.617272	0.702612	Fatty Acids, Lipids, and Isoprenoids	- none -	- none -	Octanoate-[acyl-carrier-protein]-protein-N-octanoyltransferase (EC 2.3.1.181)
fig|6666666.293769.peg.2856	1229.72	0.145618	0.312377	0.46616	0.641101	0.722874	Fatty Acids, Lipids, and Isoprenoids	- none -	- none -	Long-chain fatty acid transport protein
fig|6666666.293769.peg.448	134.609	0.122228	0.34692	0.352325	0.724595	0.792057	Fatty Acids, Lipids, and Isoprenoids	Fatty acids	Fatty Acid Biosynthesis FASII	Biotin carboxyl carrier protein of acetyl-CoA carboxylase
fig|6666666.293769.peg.73	381.974	0.0365902	0.178503	0.204984	0.837585	0.88478	Fatty Acids, Lipids, and Isoprenoids	Fatty acids	Fatty Acid Biosynthesis FASII	3-hydroxyacyl-[acyl-carrier-protein] dehydratase, FabZ form (EC 4.2.1.59)
fig|6666666.293769.peg.1915	197.683	-0.468076	0.18572	-2.52033	0.0117245	0.0281103	Hydrogen Metabolism	- none -	- none -	Quad-[4Fe-4S] ferredoxin, HycB/HydN/HyfA family
fig|6666666.293769.peg.191	30.1397	1.31558	0.583331	2.25529	0.0241152	0.0507283	Hydrogen Metabolism	- none -	- none -	Uptake [NiFe] hydrogenase maturation maturation factor HyaF
fig|6666666.293769.peg.183	217.781	-0.983213	0.453237	-2.16931	0.030059	0.0610112	Hydrogen Metabolism	Electron donating reactions	NiFe hydrogenase maturation	[NiFe] hydrogenase metallocenter assembly protein HypE
fig|6666666.293769.peg.186	81.014	0.754228	0.473612	1.5925	0.111272	0.17729	Hydrogen Metabolism	Electron donating reactions	NiFe hydrogenase maturation	[NiFe] hydrogenase nickel incorporation-associated protein HypB
fig|6666666.293769.peg.187	37.2821	1.15121	0.723194	1.59184	0.11142	0.17745	Hydrogen Metabolism	Electron donating reactions	NiFe hydrogenase maturation	[NiFe] hydrogenase nickel incorporation protein HypA
fig|6666666.293769.peg.194	25.9294	0.917355	0.600616	1.52736	0.126672	0.195821	Hydrogen Metabolism	- none -	- none -	Uptake [NiFe] hydrogenase maturation protease HyaD
fig|6666666.293769.peg.196	40.684	0.641961	0.516666	1.24251	0.21405	0.301871	Hydrogen Metabolism	- none -	- none -	Uptake [NiFe] hydrogenase, small subunit HyaA (EC 1.12.99.6)
fig|6666666.293769.peg.188	170.442	-0.616566	0.496845	-1.24096	0.214619	0.302447	Hydrogen Metabolism	Electron donating reactions	Hydrogen-sensing regulatory system	Hydrogenase maturation factor HoxV/HupK
fig|6666666.293769.peg.181	44.5187	0.609076	0.555899	1.09566	0.273227	0.366351	Hydrogen Metabolism	Electron donating reactions	Hydrogen-sensing regulatory system	Hydrogenase assembly protein HoxX
fig|6666666.293769.peg.1870	256.328	-0.252842	0.238137	-1.06175	0.288348	0.38199	Hydrogen Metabolism	Electron donating reactions	Hydrogen-sensing regulatory system	Hydrogen-sensing hydrogenase small subunit (HoxB/HupU)
fig|6666666.293769.peg.179	171.121	0.282124	0.413275	0.682656	0.494824	0.592244	Hydrogen Metabolism	Electron donating reactions	Hydrogen-sensing regulatory system	Signal transduction histidine kinase HoxJ (hydrogenase regulation)
fig|6666666.293769.peg.184	83.9947	0.200175	0.41451	0.48292	0.629152	0.71292	Hydrogen Metabolism	Electron donating reactions	NiFe hydrogenase maturation	[NiFe] hydrogenase metallocenter assembly protein HypD
fig|6666666.293769.peg.182	126.375	0.175712	0.423362	0.415041	0.678112	0.755312	Hydrogen Metabolism	Electron donating reactions	Hydrogen-sensing regulatory system	Hydrogenase assembly protein HoxX
fig|6666666.293769.peg.180	175.553	0.168448	0.434256	0.3879	0.69809	0.770483	Hydrogen Metabolism	Electron donating reactions	Hydrogen-sensing regulatory system	Hydrogenase transcriptional regulatory protein HoxA
fig|6666666.293769.peg.197	41.242	-0.167723	0.596038	-0.281397	0.778406	0.836534	Hydrogen Metabolism	- none -	- none -	Uptake [NiFe] hydrogenase, large subunit HyaB (EC 1.12.99.6)
fig|6666666.293769.peg.1872	162.335	0.0370502	0.265536	0.13953	0.889031	0.92472	Hydrogen Metabolism	Electron donating reactions	NiFe hydrogenase maturation	[NiFe] hydrogenase metallocenter assembly protein HypF
fig|6666666.293769.peg.199	20.647	0.0556092	0.53766	0.103428	0.917623	0.945321	Hydrogen Metabolism	- none -	- none -	Uptake [NiFe] hydrogenase, cytochrome b subunit HyaC
fig|6666666.293769.peg.185	40.5514	0.0404018	0.541168	0.0746566	0.940488	0.959532	Hydrogen Metabolism	Electron donating reactions	NiFe hydrogenase maturation	[NiFe] hydrogenase metallocenter assembly protein HypC
fig|6666666.293769.peg.1871	108.549	0.0130108	0.289914	0.0448781	0.964204	0.976419	Hydrogen Metabolism	Electron donating reactions	Hydrogen-sensing regulatory system	Hydrogen-sensing hydrogenase large subunit (HoxC/HupV)
fig|6666666.293769.peg.2307	113.25	-2.78962	0.330483	-8.44105	3.14491e-17	1.18154e-13	Hypothetical proteins	- none -	- none -	hypothetical protein
fig|6666666.293769.peg.2476	28.3247	3.01708	0.384654	7.84363	4.37714e-15	8.22246e-12	Hypothetical proteins	- none -	- none -	hypothetical protein
fig|6666666.293769.peg.2306	272.784	-3.17487	0.430105	-7.38162	1.56378e-13	1.95837e-10	Hypothetical proteins	- none -	- none -	hypothetical protein
fig|6666666.293769.peg.2396	151.384	-3.11994	0.444474	-7.01941	2.22812e-12	9.50077e-10	Hypothetical proteins	- none -	- none -	hypothetical protein
fig|6666666.293769.peg.4193	62.9668	-2.50388	0.356774	-7.0181	2.24901e-12	9.50077e-10	Hypothetical proteins	- none -	- none -	hypothetical protein
fig|6666666.293769.peg.1773	332.151	-2.29518	0.327115	-7.01644	2.27594e-12	9.50077e-10	Hypothetical proteins	- none -	- none -	hypothetical protein
fig|6666666.293769.peg.2994	206.624	-2.59604	0.376285	-6.89912	5.23249e-12	1.96585e-09	Hypothetical proteins	- none -	- none -	hypothetical protein
fig|6666666.293769.peg.3955	281.929	-2.32658	0.339163	-6.85978	6.89688e-12	2.3556e-09	Hypothetical proteins	- none -	- none -	hypothetical protein
fig|6666666.293769.peg.172	87.9997	1.88107	0.277563	6.7771	1.22616e-11	3.8389e-09	Hypothetical proteins	- none -	- none -	hypothetical protein
fig|6666666.293769.peg.2940	28.8499	-3.59198	0.531728	-6.75529	1.42546e-11	4.11959e-09	Hypothetical proteins	- none -	- none -	hypothetical protein
fig|6666666.293769.peg.3533	281.172	-2.71011	0.404186	-6.7051	2.01265e-11	5.4011e-09	Hypothetical proteins	- none -	- none -	hypothetical protein
fig|6666666.293769.peg.3839	55.601	-2.2171	0.332947	-6.659	2.7569e-11	6.90512e-09	Hypothetical proteins	- none -	- none -	hypothetical protein
fig|6666666.293769.peg.3554	276.346	-2.75494	0.416048	-6.6217	3.55089e-11	8.02562e-09	Hypothetical proteins	- none -	- none -	hypothetical protein
fig|6666666.293769.peg.4212	499.518	-2.18403	0.329995	-6.61838	3.6315e-11	8.02562e-09	Hypothetical proteins	- none -	- none -	hypothetical protein
fig|6666666.293769.peg.2294	1216.29	-2.94088	0.448973	-6.55025	5.7441e-11	1.13582e-08	Hypothetical proteins	- none -	- none -	hypothetical protein
fig|6666666.293769.peg.3755	802.551	-2.00659	0.310389	-6.46475	1.01465e-10	1.68823e-08	Hypothetical proteins	- none -	- none -	hypothetical protein
fig|6666666.293769.peg.2237	240.055	-2.5527	0.396633	-6.43593	1.22719e-10	1.92106e-08	Hypothetical proteins	- none -	- none -	hypothetical protein
fig|6666666.293769.peg.3821	586.816	-2.09799	0.326326	-6.42914	1.28328e-10	1.92851e-08	Hypothetical proteins	- none -	- none -	hypothetical protein
fig|6666666.293769.peg.3369	110.867	-2.40534	0.375417	-6.40712	1.48291e-10	2.12161e-08	Hypothetical proteins	- none -	- none -	hypothetical protein
fig|6666666.293769.peg.3250	55.3059	-3.04307	0.475266	-6.40288	1.52471e-10	2.12161e-08	Hypothetical proteins	- none -	- none -	hypothetical protein
fig|6666666.293769.peg.1910	1384.43	-1.70381	0.266517	-6.39287	1.62799e-10	2.18442e-08	Hypothetical proteins	- none -	- none -	hypothetical protein
fig|6666666.293769.peg.3443	203.199	-2.4379	0.383852	-6.35114	2.13722e-10	2.60848e-08	Hypothetical proteins	- none -	- none -	hypothetical protein
fig|6666666.293769.peg.3997	241.837	-2.15821	0.339872	-6.35006	2.15233e-10	2.60848e-08	Hypothetical proteins	- none -	- none -	hypothetical protein
fig|6666666.293769.peg.3356	3296.67	-2.25881	0.35615	-6.34231	2.26348e-10	2.65747e-08	Hypothetical proteins	- none -	- none -	hypothetical protein
fig|6666666.293769.peg.2479	38.5818	2.35242	0.371797	6.32716	2.49718e-10	2.84301e-08	Hypothetical proteins	- none -	- none -	hypothetical protein
fig|6666666.293769.peg.3224	391.911	-2.49624	0.395874	-6.30564	2.87003e-10	3.17139e-08	Hypothetical proteins	- none -	- none -	hypothetical protein
fig|6666666.293769.peg.3846	3834.6	-1.51478	0.242086	-6.25718	3.92009e-10	4.09105e-08	Hypothetical proteins	- none -	- none -	hypothetical protein
fig|6666666.293769.peg.2295	1204.25	-2.79979	0.452192	-6.1916	5.95559e-10	5.74497e-08	Hypothetical proteins	- none -	- none -	hypothetical protein
fig|6666666.293769.peg.2656	43.0371	-2.08223	0.336376	-6.19017	6.01008e-10	5.74497e-08	Hypothetical proteins	- none -	- none -	hypothetical protein
fig|6666666.293769.peg.3601	626.364	-2.22562	0.359702	-6.1874	6.11655e-10	5.74497e-08	Hypothetical proteins	- none -	- none -	hypothetical protein
fig|6666666.293769.peg.927	720.4	-2.04608	0.33119	-6.17796	6.49352e-10	5.80861e-08	Hypothetical proteins	- none -	- none -	hypothetical protein
fig|6666666.293769.peg.3510	688.114	-2.42859	0.394523	-6.15576	7.47188e-10	6.37997e-08	Hypothetical proteins	- none -	- none -	hypothetical protein
fig|6666666.293769.peg.4200	102.894	-2.48485	0.40448	-6.14333	8.08096e-10	6.74671e-08	Hypothetical proteins	- none -	- none -	hypothetical protein
fig|6666666.293769.peg.3960	79.8647	-2.71028	0.442517	-6.1247	9.08554e-10	7.28395e-08	Hypothetical proteins	- none -	- none -	hypothetical protein
fig|6666666.293769.peg.1512	1452.23	-3.05906	0.500652	-6.11015	9.95388e-10	7.79098e-08	Hypothetical proteins	- none -	- none -	hypothetical protein
fig|6666666.293769.peg.3924	75.2781	-2.92459	0.479131	-6.10395	1.03479e-09	7.9341e-08	Hypothetical proteins	- none -	- none -	hypothetical protein
fig|6666666.293769.peg.3069	79.9501	-2.16918	0.356075	-6.09191	1.1157e-09	8.38338e-08	Hypothetical proteins	- none -	- none -	hypothetical protein
fig|6666666.293769.peg.3343	495.206	-2.02409	0.332494	-6.08759	1.14622e-09	8.44381e-08	Hypothetical proteins	- none -	- none -	hypothetical protein
fig|6666666.293769.peg.3717	70.2484	-2.25126	0.370653	-6.07378	1.24934e-09	9.02648e-08	Hypothetical proteins	- none -	- none -	hypothetical protein
fig|6666666.293769.peg.3508	578.023	-4.02202	0.665149	-6.04679	1.47764e-09	1.04745e-07	Hypothetical proteins	- none -	- none -	hypothetical protein
fig|6666666.293769.peg.4138	283.133	-2.12865	0.352396	-6.04049	1.53644e-09	1.06896e-07	Hypothetical proteins	- none -	- none -	hypothetical protein
fig|6666666.293769.peg.3626	333.09	-2.71228	0.450194	-6.0247	1.69426e-09	1.13667e-07	Hypothetical proteins	- none -	- none -	hypothetical protein
fig|6666666.293769.peg.2836	328.837	-2.15296	0.357908	-6.01539	1.79458e-09	1.18285e-07	Hypothetical proteins	- none -	- none -	hypothetical protein
fig|6666666.293769.peg.2310	169.575	-2.09074	0.348392	-6.00113	1.95944e-09	1.22222e-07	Hypothetical proteins	- none -	- none -	hypothetical protein
fig|6666666.293769.peg.3300	380.541	-2.05373	0.342314	-5.99955	1.9786e-09	1.22222e-07	Hypothetical proteins	- none -	- none -	hypothetical protein
fig|6666666.293769.peg.2657	706.428	-2.15903	0.361633	-5.97022	2.36938e-09	1.3933e-07	Hypothetical proteins	- none -	- none -	hypothetical protein
fig|6666666.293769.peg.4171	143.078	-2.25303	0.377396	-5.96994	2.37347e-09	1.3933e-07	Hypothetical proteins	- none -	- none -	hypothetical protein
fig|6666666.293769.peg.3952	1449.13	-2.10214	0.352325	-5.9665	2.424e-09	1.40107e-07	Hypothetical proteins	- none -	- none -	hypothetical protein
fig|6666666.293769.peg.3230	2294.43	-2.76944	0.464625	-5.96059	2.51327e-09	1.43066e-07	Hypothetical proteins	- none -	- none -	hypothetical protein
fig|6666666.293769.peg.3238	440.911	-2.35027	0.395134	-5.94803	2.71395e-09	1.52184e-07	Hypothetical proteins	- none -	- none -	hypothetical protein
fig|6666666.293769.peg.4042	1741.32	-2.13362	0.359906	-5.92827	3.06139e-09	1.6669e-07	Hypothetical proteins	- none -	- none -	hypothetical protein
fig|6666666.293769.peg.2952	885.994	-2.27717	0.384405	-5.92388	3.1444e-09	1.68764e-07	Hypothetical proteins	- none -	- none -	hypothetical protein
fig|6666666.293769.peg.2910	145.463	-2.60826	0.440712	-5.91829	3.25311e-09	1.68838e-07	Hypothetical proteins	- none -	- none -	hypothetical protein
fig|6666666.293769.peg.4170	214.455	-2.04681	0.345893	-5.91746	3.26948e-09	1.68838e-07	Hypothetical proteins	- none -	- none -	hypothetical protein
fig|6666666.293769.peg.3817	125.309	-2.15237	0.363804	-5.9163	3.29269e-09	1.68838e-07	Hypothetical proteins	- none -	- none -	hypothetical protein
fig|6666666.293769.peg.3345	901.668	-2.44218	0.412902	-5.91466	3.32552e-09	1.68838e-07	Hypothetical proteins	- none -	- none -	hypothetical protein
fig|6666666.293769.peg.1071	314.452	1.59177	0.269597	5.90426	3.54244e-09	1.77452e-07	Hypothetical proteins	- none -	- none -	hypothetical protein
fig|6666666.293769.peg.3555	379.347	-2.37381	0.403521	-5.88275	4.0351e-09	1.97511e-07	Hypothetical proteins	- none -	- none -	hypothetical protein
fig|6666666.293769.peg.3113	818.854	-2.23406	0.379799	-5.88222	4.04801e-09	1.97511e-07	Hypothetical proteins	- none -	- none -	hypothetical protein
fig|6666666.293769.peg.2685	2398.21	-2.0838	0.354493	-5.87826	4.14607e-09	1.99702e-07	Hypothetical proteins	- none -	- none -	hypothetical protein
fig|6666666.293769.peg.4106	838.478	-2.03658	0.348054	-5.85134	4.87616e-09	2.28997e-07	Hypothetical proteins	- none -	- none -	hypothetical protein
fig|6666666.293769.peg.3919	908.934	-2.24961	0.385113	-5.84142	5.17567e-09	2.37134e-07	Hypothetical proteins	- none -	- none -	hypothetical protein
fig|6666666.293769.peg.3950	317.779	-2.13627	0.366679	-5.82598	5.67788e-09	2.55099e-07	Hypothetical proteins	- none -	- none -	hypothetical protein
fig|6666666.293769.peg.1237	42.7422	-2.4115	0.413975	-5.82523	5.70356e-09	2.55099e-07	Hypothetical proteins	- none -	- none -	hypothetical protein
fig|6666666.293769.peg.864	76.0079	2.14365	0.368336	5.81981	5.89159e-09	2.5738e-07	Hypothetical proteins	- none -	- none -	hypothetical protein
fig|6666666.293769.peg.3851	366.335	-2.49871	0.429763	-5.81415	6.09421e-09	2.63172e-07	Hypothetical proteins	- none -	- none -	hypothetical protein
fig|6666666.293769.peg.4139	187.48	-2.10069	0.36165	-5.80862	6.29908e-09	2.68928e-07	Hypothetical proteins	- none -	- none -	hypothetical protein
fig|6666666.293769.peg.3850	3332.49	-1.99795	0.344467	-5.8001	6.62734e-09	2.76655e-07	Hypothetical proteins	- none -	- none -	hypothetical protein
fig|6666666.293769.peg.3588	26.9513	-2.91109	0.503841	-5.77779	7.56879e-09	3.05763e-07	Hypothetical proteins	- none -	- none -	hypothetical protein
fig|6666666.293769.peg.2780	232.127	-2.37716	0.411898	-5.77123	7.86949e-09	3.13022e-07	Hypothetical proteins	- none -	- none -	hypothetical protein
fig|6666666.293769.peg.4133	236.912	-1.9881	0.344603	-5.76926	7.96208e-09	3.13022e-07	Hypothetical proteins	- none -	- none -	hypothetical protein
fig|6666666.293769.peg.2545	320.781	-2.98351	0.517208	-5.76849	7.99844e-09	3.13022e-07	Hypothetical proteins	- none -	- none -	hypothetical protein
fig|6666666.293769.peg.2159	324.37	-2.53599	0.439762	-5.76672	8.0828e-09	3.13063e-07	Hypothetical proteins	- none -	- none -	hypothetical protein
fig|6666666.293769.peg.3739	202.783	-2.62533	0.455929	-5.75819	8.50223e-09	3.23518e-07	Hypothetical proteins	- none -	- none -	hypothetical protein
fig|6666666.293769.peg.3773	299.352	-2.32785	0.404299	-5.75774	8.52495e-09	3.23518e-07	Hypothetical proteins	- none -	- none -	hypothetical protein
fig|6666666.293769.peg.930	181.761	-2.28636	0.39722	-5.7559	8.61831e-09	3.2379e-07	Hypothetical proteins	- none -	- none -	hypothetical protein
fig|6666666.293769.peg.4020	915.705	-2.12237	0.369165	-5.74911	8.97135e-09	3.30445e-07	Hypothetical proteins	- none -	- none -	hypothetical protein
fig|6666666.293769.peg.2680	139.228	-2.17964	0.380315	-5.73114	9.97594e-09	3.6388e-07	Hypothetical proteins	- none -	- none -	hypothetical protein
fig|6666666.293769.peg.4069	572.686	-2.16695	0.378696	-5.72213	1.05195e-08	3.76396e-07	Hypothetical proteins	- none -	- none -	hypothetical protein
fig|6666666.293769.peg.3006	461.769	-1.93167	0.337637	-5.72115	1.05804e-08	3.76396e-07	Hypothetical proteins	- none -	- none -	hypothetical protein
fig|6666666.293769.peg.1904	3095.77	-2.28843	0.400039	-5.72052	1.06196e-08	3.76396e-07	Hypothetical proteins	- none -	- none -	hypothetical protein
fig|6666666.293769.peg.2240	69.1376	-2.91039	0.509524	-5.71197	1.11673e-08	3.92107e-07	Hypothetical proteins	- none -	- none -	hypothetical protein
fig|6666666.293769.peg.3181	914.087	-2.05725	0.360957	-5.69941	1.20221e-08	4.18212e-07	Hypothetical proteins	- none -	- none -	hypothetical protein
fig|6666666.293769.peg.3318	165.182	-2.46059	0.432595	-5.68799	1.28546e-08	4.4307e-07	Hypothetical proteins	- none -	- none -	hypothetical protein
fig|6666666.293769.peg.1242	614.353	-1.81498	0.319374	-5.68293	1.32406e-08	4.52227e-07	Hypothetical proteins	- none -	- none -	hypothetical protein
fig|6666666.293769.peg.353	141.867	-2.20168	0.387716	-5.67859	1.35809e-08	4.53333e-07	Hypothetical proteins	- none -	- none -	hypothetical protein
fig|6666666.293769.peg.4151	140.715	-2.11893	0.373181	-5.67803	1.36255e-08	4.53333e-07	Hypothetical proteins	- none -	- none -	hypothetical protein
fig|6666666.293769.peg.3687	525.246	-2.09305	0.36863	-5.67791	1.3635e-08	4.53333e-07	Hypothetical proteins	- none -	- none -	hypothetical protein
fig|6666666.293769.peg.3582	543.745	-1.79215	0.316033	-5.67077	1.4216e-08	4.64431e-07	Hypothetical proteins	- none -	- none -	hypothetical protein
fig|6666666.293769.peg.3679	46.9551	-2.14115	0.378054	-5.66361	1.48217e-08	4.80044e-07	Hypothetical proteins	- none -	- none -	hypothetical protein
fig|6666666.293769.peg.3623	94.0079	-2.33976	0.414019	-5.65134	1.59198e-08	5.08286e-07	Hypothetical proteins	- none -	- none -	hypothetical protein
fig|6666666.293769.peg.2308	140.094	-2.64884	0.469343	-5.64372	1.66417e-08	5.22744e-07	Hypothetical proteins	- none -	- none -	hypothetical protein
fig|6666666.293769.peg.3393	820.33	-2.00345	0.355129	-5.64148	1.68593e-08	5.22744e-07	Hypothetical proteins	- none -	- none -	hypothetical protein
fig|6666666.293769.peg.2314	95.2878	-2.04375	0.362348	-5.6403	1.69749e-08	5.22744e-07	Hypothetical proteins	- none -	- none -	hypothetical protein
fig|6666666.293769.peg.3972	103.609	-2.48561	0.440925	-5.63727	1.72768e-08	5.27715e-07	Hypothetical proteins	- none -	- none -	hypothetical protein
fig|6666666.293769.peg.3982	74.0778	-2.21128	0.39242	-5.63499	1.75072e-08	5.30441e-07	Hypothetical proteins	- none -	- none -	hypothetical protein
fig|6666666.293769.peg.2775	135.397	-1.90729	0.338898	-5.62792	1.82395e-08	5.48208e-07	Hypothetical proteins	- none -	- none -	hypothetical protein
fig|6666666.293769.peg.3835	900.24	-2.04932	0.365323	-5.60959	2.02803e-08	5.95259e-07	Hypothetical proteins	- none -	- none -	hypothetical protein
fig|6666666.293769.peg.3468	183.879	-2.19005	0.391403	-5.59539	2.20125e-08	6.41094e-07	Hypothetical proteins	- none -	- none -	hypothetical protein
fig|6666666.293769.peg.3124	451.561	-2.06667	0.369888	-5.58729	2.30643e-08	6.61688e-07	Hypothetical proteins	- none -	- none -	hypothetical protein
fig|6666666.293769.peg.3375	43.0694	-1.95885	0.350594	-5.58723	2.30719e-08	6.61688e-07	Hypothetical proteins	- none -	- none -	hypothetical protein
fig|6666666.293769.peg.2322	187.001	-2.22043	0.397701	-5.58315	2.36195e-08	6.72261e-07	Hypothetical proteins	- none -	- none -	hypothetical protein
fig|6666666.293769.peg.3820	247.43	-1.73492	0.311034	-5.57789	2.43451e-08	6.79852e-07	Hypothetical proteins	- none -	- none -	hypothetical protein
fig|6666666.293769.peg.4068	63.1252	-2.28894	0.410456	-5.57658	2.45292e-08	6.79852e-07	Hypothetical proteins	- none -	- none -	hypothetical protein
fig|6666666.293769.peg.933	901.132	-2.1727	0.389637	-5.5762	2.45827e-08	6.79852e-07	Hypothetical proteins	- none -	- none -	hypothetical protein
fig|6666666.293769.peg.3897	37.0643	-2.50065	0.448466	-5.57601	2.461e-08	6.79852e-07	Hypothetical proteins	- none -	- none -	hypothetical protein
fig|6666666.293769.peg.3073	85.7992	-2.14901	0.38615	-5.56523	2.61812e-08	7.07646e-07	Hypothetical proteins	- none -	- none -	hypothetical protein
fig|6666666.293769.peg.2776	2720.17	-2.10094	0.378383	-5.55241	2.8175e-08	7.52905e-07	Hypothetical proteins	- none -	- none -	hypothetical protein
fig|6666666.293769.peg.2382	735.676	-1.95376	0.351907	-5.55191	2.82565e-08	7.52905e-07	Hypothetical proteins	- none -	- none -	hypothetical protein
fig|6666666.293769.peg.3959	59.5842	-2.21513	0.400178	-5.53535	3.106e-08	8.14657e-07	Hypothetical proteins	- none -	- none -	hypothetical protein
fig|6666666.293769.peg.4022	219.698	-1.969	0.355773	-5.53443	3.12246e-08	8.14657e-07	Hypothetical proteins	- none -	- none -	hypothetical protein
fig|6666666.293769.peg.3589	31.4581	-2.18598	0.395879	-5.52185	3.35449e-08	8.69161e-07	Hypothetical proteins	- none -	- none -	hypothetical protein
fig|6666666.293769.peg.3325	465.65	-2.01121	0.364598	-5.51623	3.46343e-08	8.89289e-07	Hypothetical proteins	- none -	- none -	hypothetical protein
fig|6666666.293769.peg.3301	403.321	-2.60214	0.472377	-5.50861	3.6168e-08	9.1813e-07	Hypothetical proteins	- none -	- none -	hypothetical protein
fig|6666666.293769.peg.3299	280.984	-1.98774	0.361519	-5.49831	3.83448e-08	9.61036e-07	Hypothetical proteins	- none -	- none -	hypothetical protein
fig|6666666.293769.peg.1185	17313.3	-1.48161	0.269472	-5.4982	3.83698e-08	9.61036e-07	Hypothetical proteins	- none -	- none -	hypothetical protein
fig|6666666.293769.peg.3657	658.509	-2.1753	0.395788	-5.49612	3.8823e-08	9.65946e-07	Hypothetical proteins	- none -	- none -	hypothetical protein
fig|6666666.293769.peg.2912	732.382	-2.04534	0.372379	-5.49264	3.95961e-08	9.78702e-07	Hypothetical proteins	- none -	- none -	hypothetical protein
fig|6666666.293769.peg.3524	1105.08	-2.0567	0.374733	-5.48844	4.05505e-08	9.90955e-07	Hypothetical proteins	- none -	- none -	hypothetical protein
fig|6666666.293769.peg.1881	20.2981	2.37321	0.434978	5.45592	4.87193e-08	1.15847e-06	Hypothetical proteins	- none -	- none -	hypothetical protein
fig|6666666.293769.peg.2755	1580.98	-2.02181	0.370839	-5.45199	4.98099e-08	1.17695e-06	Hypothetical proteins	- none -	- none -	hypothetical protein
fig|6666666.293769.peg.2832	338.762	-2.20788	0.405597	-5.44351	5.22399e-08	1.22666e-06	Hypothetical proteins	- none -	- none -	hypothetical protein
fig|6666666.293769.peg.3147	98.2747	-2.11727	0.3892	-5.44005	5.32666e-08	1.23581e-06	Hypothetical proteins	- none -	- none -	hypothetical protein
fig|6666666.293769.peg.1960	251.243	-2.09601	0.385297	-5.43998	5.32874e-08	1.23581e-06	Hypothetical proteins	- none -	- none -	hypothetical protein
fig|6666666.293769.peg.3539	110.109	-2.07809	0.382386	-5.43455	5.49364e-08	1.25851e-06	Hypothetical proteins	- none -	- none -	hypothetical protein
fig|6666666.293769.peg.3005	82.1662	-2.31587	0.426388	-5.43138	5.59214e-08	1.26077e-06	Hypothetical proteins	- none -	- none -	hypothetical protein
fig|6666666.293769.peg.4188	17.1052	-2.65958	0.48971	-5.43092	5.60648e-08	1.26077e-06	Hypothetical proteins	- none -	- none -	hypothetical protein
fig|6666666.293769.peg.2158	138.975	-2.54032	0.467836	-5.42993	5.63773e-08	1.26077e-06	Hypothetical proteins	- none -	- none -	hypothetical protein
fig|6666666.293769.peg.3967	77.7642	-2.6271	0.484539	-5.42186	5.89806e-08	1.31118e-06	Hypothetical proteins	- none -	- none -	hypothetical protein
fig|6666666.293769.peg.4000	362.668	-2.03097	0.374697	-5.42031	5.9496e-08	1.31486e-06	Hypothetical proteins	- none -	- none -	hypothetical protein
fig|6666666.293769.peg.2536	118.571	-2.34338	0.432865	-5.41364	6.17558e-08	1.35682e-06	Hypothetical proteins	- none -	- none -	hypothetical protein
fig|6666666.293769.peg.2485	1840.39	-2.67158	0.494097	-5.407	6.40887e-08	1.39989e-06	Hypothetical proteins	- none -	- none -	hypothetical protein
fig|6666666.293769.peg.3499	435.889	-1.87472	0.346984	-5.40289	6.55755e-08	1.42036e-06	Hypothetical proteins	- none -	- none -	hypothetical protein
fig|6666666.293769.peg.3700	1861.47	-1.96132	0.36305	-5.40233	6.5782e-08	1.42036e-06	Hypothetical proteins	- none -	- none -	hypothetical protein
fig|6666666.293769.peg.2309	475.714	-2.0997	0.388769	-5.4009	6.63061e-08	1.42174e-06	Hypothetical proteins	- none -	- none -	hypothetical protein
fig|6666666.293769.peg.4168	95.7043	-1.72522	0.319534	-5.39917	6.6951e-08	1.42174e-06	Hypothetical proteins	- none -	- none -	hypothetical protein
fig|6666666.293769.peg.3254	1478.17	-1.73191	0.320778	-5.39909	6.6981e-08	1.42174e-06	Hypothetical proteins	- none -	- none -	hypothetical protein
fig|6666666.293769.peg.2771	1428.63	-2.10588	0.391197	-5.38317	7.31867e-08	1.5361e-06	Hypothetical proteins	- none -	- none -	hypothetical protein
fig|6666666.293769.peg.3198	65.0554	1.3775	0.255988	5.3811	7.40302e-08	1.54518e-06	Hypothetical proteins	- none -	- none -	hypothetical protein
fig|6666666.293769.peg.3364	1581.43	-2.0283	0.377063	-5.37921	7.48154e-08	1.55175e-06	Hypothetical proteins	- none -	- none -	hypothetical protein
fig|6666666.293769.peg.4158	2714.43	-1.90823	0.354799	-5.37835	7.51714e-08	1.55175e-06	Hypothetical proteins	- none -	- none -	hypothetical protein
fig|6666666.293769.peg.3706	406.585	-2.12166	0.394663	-5.37589	7.62067e-08	1.56176e-06	Hypothetical proteins	- none -	- none -	hypothetical protein
fig|6666666.293769.peg.3768	1492.45	-2.13526	0.39724	-5.37522	7.64875e-08	1.56176e-06	Hypothetical proteins	- none -	- none -	hypothetical protein
fig|6666666.293769.peg.1450	31.2099	2.20902	0.411476	5.36851	7.93881e-08	1.61222e-06	Hypothetical proteins	- none -	- none -	hypothetical protein
fig|6666666.293769.peg.2963	691.105	-2.62494	0.489748	-5.35978	8.33242e-08	1.68306e-06	Hypothetical proteins	- none -	- none -	hypothetical protein
fig|6666666.293769.peg.3693	435.818	-1.85862	0.347715	-5.34524	9.02954e-08	1.80447e-06	Hypothetical proteins	- none -	- none -	hypothetical protein
fig|6666666.293769.peg.2823	168.406	-2.54595	0.476423	-5.34389	9.09712e-08	1.80835e-06	Hypothetical proteins	- none -	- none -	hypothetical protein
fig|6666666.293769.peg.3080	397.673	-2.13285	0.399677	-5.33645	9.47845e-08	1.8555e-06	Hypothetical proteins	- none -	- none -	hypothetical protein
fig|6666666.293769.peg.3142	169.135	-2.40885	0.451656	-5.33337	9.64075e-08	1.8767e-06	Hypothetical proteins	- none -	- none -	hypothetical protein
fig|6666666.293769.peg.2384	243.452	-2.14076	0.401996	-5.32531	1.00779e-07	1.95168e-06	Hypothetical proteins	- none -	- none -	hypothetical protein
fig|6666666.293769.peg.3431	105.572	3.67923	0.691103	5.32371	1.01672e-07	1.95888e-06	Hypothetical proteins	- none -	- none -	hypothetical protein
fig|6666666.293769.peg.3365	159.818	-1.86662	0.351375	-5.31232	1.08237e-07	2.07418e-06	Hypothetical proteins	- none -	- none -	hypothetical protein
fig|6666666.293769.peg.3807	242.488	-2.07449	0.3906	-5.31103	1.09008e-07	2.07418e-06	Hypothetical proteins	- none -	- none -	hypothetical protein
fig|6666666.293769.peg.3884	220.862	-2.36132	0.444649	-5.31052	1.09313e-07	2.07418e-06	Hypothetical proteins	- none -	- none -	hypothetical protein
fig|6666666.293769.peg.3910	123.311	-3.85517	0.726395	-5.30726	1.11286e-07	2.10101e-06	Hypothetical proteins	- none -	- none -	hypothetical protein
fig|6666666.293769.peg.3305	87.9718	-2.61596	0.493098	-5.30515	1.12577e-07	2.11477e-06	Hypothetical proteins	- none -	- none -	hypothetical protein
fig|6666666.293769.peg.3523	3256.79	-2.01239	0.379607	-5.30124	1.15017e-07	2.14775e-06	Hypothetical proteins	- none -	- none -	hypothetical protein
fig|6666666.293769.peg.1837	2197.1	-1.25493	0.236756	-5.30051	1.15477e-07	2.14775e-06	Hypothetical proteins	- none -	- none -	hypothetical protein
fig|6666666.293769.peg.2954	807.269	-3.15187	0.595668	-5.29131	1.21442e-07	2.22565e-06	Hypothetical proteins	- none -	- none -	hypothetical protein
fig|6666666.293769.peg.3684	793.098	-2.16493	0.409222	-5.29035	1.22085e-07	2.22658e-06	Hypothetical proteins	- none -	- none -	hypothetical protein
fig|6666666.293769.peg.2524	44.0029	-2.61948	0.495378	-5.28783	1.23775e-07	2.24648e-06	Hypothetical proteins	- none -	- none -	hypothetical protein
fig|6666666.293769.peg.3466	47.3368	-1.97424	0.373692	-5.28305	1.2705e-07	2.28386e-06	Hypothetical proteins	- none -	- none -	hypothetical protein
fig|6666666.293769.peg.3774	213.527	-2.07697	0.393489	-5.27835	1.30354e-07	2.32104e-06	Hypothetical proteins	- none -	- none -	hypothetical protein
fig|6666666.293769.peg.3923	34.3334	-2.93858	0.556818	-5.27744	1.31e-07	2.32154e-06	Hypothetical proteins	- none -	- none -	hypothetical protein
fig|6666666.293769.peg.3751	233.905	-2.12948	0.404147	-5.26907	1.37115e-07	2.4185e-06	Hypothetical proteins	- none -	- none -	hypothetical protein
fig|6666666.293769.peg.2535	271.486	-1.57779	0.299543	-5.26734	1.38415e-07	2.43003e-06	Hypothetical proteins	- none -	- none -	hypothetical protein
fig|6666666.293769.peg.3752	48.1306	-2.43326	0.462785	-5.25786	1.45739e-07	2.52323e-06	Hypothetical proteins	- none -	- none -	hypothetical protein
fig|6666666.293769.peg.3655	1547.22	-1.95427	0.372601	-5.24492	1.56346e-07	2.68417e-06	Hypothetical proteins	- none -	- none -	hypothetical protein
fig|6666666.293769.peg.4105	15.9531	-2.91022	0.554878	-5.24479	1.56463e-07	2.68417e-06	Hypothetical proteins	- none -	- none -	hypothetical protein
fig|6666666.293769.peg.1316	116.898	1.29427	0.246885	5.24242	1.5848e-07	2.7064e-06	Hypothetical proteins	- none -	- none -	hypothetical protein
fig|6666666.293769.peg.3293	24.7787	-3.63925	0.695438	-5.23303	1.66752e-07	2.8334e-06	Hypothetical proteins	- none -	- none -	hypothetical protein
fig|6666666.293769.peg.3808	251.229	-2.14911	0.41074	-5.23229	1.67425e-07	2.8334e-06	Hypothetical proteins	- none -	- none -	hypothetical protein
fig|6666666.293769.peg.1982	172.176	0.895931	0.171485	5.22454	1.74591e-07	2.9283e-06	Hypothetical proteins	- none -	- none -	hypothetical protein
fig|6666666.293769.peg.3896	177.711	-2.2361	0.428221	-5.22185	1.77148e-07	2.95347e-06	Hypothetical proteins	- none -	- none -	hypothetical protein
fig|6666666.293769.peg.3962	35.5905	-2.44137	0.467578	-5.22131	1.77664e-07	2.95347e-06	Hypothetical proteins	- none -	- none -	hypothetical protein
fig|6666666.293769.peg.3986	130.202	-2.00198	0.38417	-5.2112	1.87626e-07	3.09172e-06	Hypothetical proteins	- none -	- none -	hypothetical protein
fig|6666666.293769.peg.3079	2353.98	-2.22475	0.427315	-5.20636	1.92578e-07	3.15945e-06	Hypothetical proteins	- none -	- none -	hypothetical protein
fig|6666666.293769.peg.3753	1252.62	-2.13791	0.410753	-5.20486	1.94146e-07	3.17133e-06	Hypothetical proteins	- none -	- none -	hypothetical protein
fig|6666666.293769.peg.1907	6890.3	-3.61809	0.69608	-5.1978	2.0166e-07	3.25177e-06	Hypothetical proteins	- none -	- none -	hypothetical protein
fig|6666666.293769.peg.2495	613.737	-2.23733	0.430479	-5.1973	2.02201e-07	3.25177e-06	Hypothetical proteins	- none -	- none -	hypothetical protein
fig|6666666.293769.peg.3211	49.8344	-1.97433	0.379898	-5.197	2.02532e-07	3.25177e-06	Hypothetical proteins	- none -	- none -	hypothetical protein
fig|6666666.293769.peg.1238	112.849	-2.14937	0.414018	-5.1915	2.08602e-07	3.3306e-06	Hypothetical proteins	- none -	- none -	hypothetical protein
fig|6666666.293769.peg.47	1208.91	-1.80274	0.347324	-5.19035	2.09897e-07	3.3306e-06	Hypothetical proteins	- none -	- none -	hypothetical protein
fig|6666666.293769.peg.813	33.8432	2.56871	0.494918	5.19017	2.10102e-07	3.3306e-06	Hypothetical proteins	- none -	- none -	hypothetical protein
fig|6666666.293769.peg.2655	46.675	-2.29445	0.442248	-5.18814	2.124e-07	3.33298e-06	Hypothetical proteins	- none -	- none -	hypothetical protein
fig|6666666.293769.peg.2230	1194.77	-2.81021	0.541728	-5.1875	2.13134e-07	3.33298e-06	Hypothetical proteins	- none -	- none -	hypothetical protein
fig|6666666.293769.peg.3342	95.0345	-1.9815	0.382002	-5.18714	2.13545e-07	3.33298e-06	Hypothetical proteins	- none -	- none -	hypothetical protein
fig|6666666.293769.peg.2379	183.895	-2.08013	0.401202	-5.18474	2.16319e-07	3.3583e-06	Hypothetical proteins	- none -	- none -	hypothetical protein
fig|6666666.293769.peg.3683	523.088	-2.16963	0.418535	-5.18386	2.17337e-07	3.36022e-06	Hypothetical proteins	- none -	- none -	hypothetical protein
fig|6666666.293769.peg.3322	437.281	-2.70358	0.522003	-5.17924	2.22789e-07	3.4304e-06	Hypothetical proteins	- none -	- none -	hypothetical protein
fig|6666666.293769.peg.3642	107.028	-2.16274	0.418032	-5.17362	2.29605e-07	3.50661e-06	Hypothetical proteins	- none -	- none -	hypothetical protein
fig|6666666.293769.peg.3341	207.412	-2.26378	0.438091	-5.16738	2.37405e-07	3.59665e-06	Hypothetical proteins	- none -	- none -	hypothetical protein
fig|6666666.293769.peg.3446	278.898	-2.06124	0.398942	-5.16677	2.3818e-07	3.59665e-06	Hypothetical proteins	- none -	- none -	hypothetical protein
fig|6666666.293769.peg.3703	110.693	-1.77267	0.343102	-5.16661	2.38373e-07	3.59665e-06	Hypothetical proteins	- none -	- none -	hypothetical protein
fig|6666666.293769.peg.1511	1787.64	-2.85136	0.552155	-5.16405	2.41667e-07	3.63095e-06	Hypothetical proteins	- none -	- none -	conserved hypothetical protein
fig|6666666.293769.peg.3184	131.341	-2.10081	0.406974	-5.16203	2.44286e-07	3.63095e-06	Hypothetical proteins	- none -	- none -	hypothetical protein
fig|6666666.293769.peg.3643	59.1362	-2.36148	0.457476	-5.16198	2.44347e-07	3.63095e-06	Hypothetical proteins	- none -	- none -	hypothetical protein
fig|6666666.293769.peg.4206	35.0907	-2.21638	0.429428	-5.16123	2.45338e-07	3.63095e-06	Hypothetical proteins	- none -	- none -	hypothetical protein
fig|6666666.293769.peg.827	225.762	1.1789	0.228419	5.16112	2.45478e-07	3.63095e-06	Hypothetical proteins	- none -	- none -	hypothetical protein
fig|6666666.293769.peg.3183	567.625	-2.34938	0.455953	-5.15268	2.56785e-07	3.75386e-06	Hypothetical proteins	- none -	- none -	hypothetical protein
fig|6666666.293769.peg.3409	262.053	-1.8729	0.363762	-5.14871	2.62291e-07	3.79959e-06	Hypothetical proteins	- none -	- none -	hypothetical protein
fig|6666666.293769.peg.2915	8.77982	-5.39911	1.04873	-5.14824	2.62947e-07	3.79959e-06	Hypothetical proteins	- none -	- none -	hypothetical protein
fig|6666666.293769.peg.2446	13.0105	-3.62532	0.704478	-5.14611	2.65945e-07	3.81357e-06	Hypothetical proteins	- none -	- none -	hypothetical protein
fig|6666666.293769.peg.3932	192.468	-2.13718	0.415775	-5.14024	2.74395e-07	3.91978e-06	Hypothetical proteins	- none -	- none -	hypothetical protein
fig|6666666.293769.peg.3800	390.177	-2.34024	0.455464	-5.13815	2.77464e-07	3.9337e-06	Hypothetical proteins	- none -	- none -	hypothetical protein
fig|6666666.293769.peg.3440	115.162	1.2047	0.234617	5.13475	2.82517e-07	3.99029e-06	Hypothetical proteins	- none -	- none -	hypothetical protein
fig|6666666.293769.peg.1687	116.199	1.12673	0.219487	5.13347	2.84446e-07	4.00249e-06	Hypothetical proteins	- none -	- none -	hypothetical protein
fig|6666666.293769.peg.3461	33.4669	-2.82315	0.550055	-5.13249	2.85931e-07	4.00837e-06	Hypothetical proteins	- none -	- none -	hypothetical protein
fig|6666666.293769.peg.3844	102.906	-2.38759	0.466102	-5.12246	3.01573e-07	4.21193e-06	Hypothetical proteins	- none -	- none -	hypothetical protein
fig|6666666.293769.peg.2430	534.033	-1.98994	0.388771	-5.11853	3.0793e-07	4.28479e-06	Hypothetical proteins	- none -	- none -	hypothetical protein
fig|6666666.293769.peg.2519	281.347	-1.34526	0.263059	-5.11388	3.15605e-07	4.37538e-06	Hypothetical proteins	- none -	- none -	hypothetical protein
fig|6666666.293769.peg.3302	427.011	-2.35038	0.459768	-5.11211	3.18579e-07	4.40037e-06	Hypothetical proteins	- none -	- none -	hypothetical protein
fig|6666666.293769.peg.3512	114.239	-1.86916	0.366395	-5.10149	3.36997e-07	4.63772e-06	Hypothetical proteins	- none -	- none -	hypothetical protein
fig|6666666.293769.peg.3615	506.936	-2.0524	0.402507	-5.09903	3.41397e-07	4.68113e-06	Hypothetical proteins	- none -	- none -	hypothetical protein
fig|6666666.293769.peg.3836	62.9093	-2.12825	0.417668	-5.09555	3.47725e-07	4.75056e-06	Hypothetical proteins	- none -	- none -	hypothetical protein
fig|6666666.293769.peg.4203	166.488	-2.15677	0.423771	-5.08948	3.59045e-07	4.88744e-06	Hypothetical proteins	- none -	- none -	hypothetical protein
fig|6666666.293769.peg.3072	236.768	-2.85432	0.561045	-5.08752	3.62785e-07	4.90281e-06	Hypothetical proteins	- none -	- none -	hypothetical protein
fig|6666666.293769.peg.3118	72.8207	-2.85088	0.561083	-5.08103	3.75389e-07	5.04651e-06	Hypothetical proteins	- none -	- none -	hypothetical protein
fig|6666666.293769.peg.3602	2355.58	-1.87216	0.368493	-5.08058	3.76278e-07	5.04651e-06	Hypothetical proteins	- none -	- none -	hypothetical protein
fig|6666666.293769.peg.2061	232.232	-1.36881	0.269451	-5.07999	3.77447e-07	5.04651e-06	Hypothetical proteins	- none -	- none -	hypothetical protein
fig|6666666.293769.peg.3720	982.637	-1.81362	0.357421	-5.07418	3.89178e-07	5.15384e-06	Hypothetical proteins	- none -	- none -	hypothetical protein
fig|6666666.293769.peg.3786	1174.8	-1.97875	0.389981	-5.07397	3.8959e-07	5.15384e-06	Hypothetical proteins	- none -	- none -	hypothetical protein
fig|6666666.293769.peg.3161	358.386	-2.03655	0.401753	-5.06915	3.99603e-07	5.26775e-06	Hypothetical proteins	- none -	- none -	hypothetical protein
fig|6666666.293769.peg.2156	1521.36	-2.18921	0.43241	-5.06281	4.13114e-07	5.42682e-06	Hypothetical proteins	- none -	- none -	hypothetical protein
fig|6666666.293769.peg.3646	191.045	-2.27703	0.449872	-5.0615	4.15961e-07	5.44517e-06	Hypothetical proteins	- none -	- none -	hypothetical protein
fig|6666666.293769.peg.2901	169.672	-2.63777	0.521904	-5.05412	4.32382e-07	5.64048e-06	Hypothetical proteins	- none -	- none -	hypothetical protein
fig|6666666.293769.peg.2943	1601.25	-2.26062	0.449339	-5.031	4.87932e-07	6.32124e-06	Hypothetical proteins	- none -	- none -	hypothetical protein
fig|6666666.293769.peg.3652	205.498	-1.93926	0.385818	-5.02635	4.99913e-07	6.45421e-06	Hypothetical proteins	- none -	- none -	hypothetical protein
fig|6666666.293769.peg.3370	165.584	-2.20361	0.439056	-5.01897	5.19481e-07	6.67295e-06	Hypothetical proteins	- none -	- none -	hypothetical protein
fig|6666666.293769.peg.2650	47.8752	3.32677	0.662884	5.01863	5.20408e-07	6.67295e-06	Hypothetical proteins	- none -	- none -	hypothetical protein
fig|6666666.293769.peg.1209	35.4273	2.29688	0.457793	5.01728	5.24083e-07	6.6972e-06	Hypothetical proteins	- none -	- none -	hypothetical protein
fig|6666666.293769.peg.2686	161.452	-3.20526	0.639403	-5.0129	5.36168e-07	6.82842e-06	Hypothetical proteins	- none -	- none -	hypothetical protein
fig|6666666.293769.peg.3315	648.484	-1.95074	0.389347	-5.01027	5.43524e-07	6.88561e-06	Hypothetical proteins	- none -	- none -	hypothetical protein
fig|6666666.293769.peg.3138	645.152	-1.94104	0.387435	-5.00999	5.44325e-07	6.88561e-06	Hypothetical proteins	- none -	- none -	hypothetical protein
fig|6666666.293769.peg.3520	71.6498	-1.98876	0.397524	-5.00286	5.64846e-07	7.12123e-06	Hypothetical proteins	- none -	- none -	hypothetical protein
fig|6666666.293769.peg.2706	122.114	-2.07336	0.415355	-4.99178	5.98256e-07	7.49216e-06	Hypothetical proteins	- none -	- none -	hypothetical protein
fig|6666666.293769.peg.4190	381.546	-2.07109	0.41513	-4.989	6.06912e-07	7.57531e-06	Hypothetical proteins	- none -	- none -	hypothetical protein
fig|6666666.293769.peg.2023	25.0143	1.76498	0.35405	4.98511	6.19266e-07	7.70392e-06	Hypothetical proteins	- none -	- none -	hypothetical protein
fig|6666666.293769.peg.1482	731.904	0.698369	0.140111	4.9844	6.21541e-07	7.7067e-06	Hypothetical proteins	- none -	- none -	hypothetical protein
fig|6666666.293769.peg.3704	45.2896	-2.33855	0.470117	-4.9744	6.54492e-07	8.08858e-06	Hypothetical proteins	- none -	- none -	hypothetical protein
fig|6666666.293769.peg.2927	276.834	-2.0846	0.419385	-4.97063	6.6737e-07	8.16713e-06	Hypothetical proteins	- none -	- none -	hypothetical protein
fig|6666666.293769.peg.4179	88.4712	-2.15754	0.435924	-4.94934	7.44646e-07	9.02463e-06	Hypothetical proteins	- none -	- none -	hypothetical protein
fig|6666666.293769.peg.3816	18.3198	-2.27501	0.459942	-4.94629	7.56403e-07	9.10835e-06	Hypothetical proteins	- none -	- none -	hypothetical protein
fig|6666666.293769.peg.3654	61.0989	-2.2169	0.449099	-4.93632	7.96093e-07	9.55566e-06	Hypothetical proteins	- none -	- none -	hypothetical protein
fig|6666666.293769.peg.3945	41.2727	-2.54122	0.515234	-4.93217	8.13195e-07	9.72985e-06	Hypothetical proteins	- none -	- none -	hypothetical protein
fig|6666666.293769.peg.2945	356.452	-2.22832	0.451983	-4.93009	8.21923e-07	9.80306e-06	Hypothetical proteins	- none -	- none -	hypothetical protein
fig|6666666.293769.peg.3363	68.7213	-2.36919	0.480859	-4.92699	8.35078e-07	9.89795e-06	Hypothetical proteins	- none -	- none -	hypothetical protein
fig|6666666.293769.peg.3852	1002.75	-1.94676	0.395134	-4.92683	8.35725e-07	9.89795e-06	Hypothetical proteins	- none -	- none -	hypothetical protein
fig|6666666.293769.peg.3581	141.766	-2.0645	0.419073	-4.92635	8.37782e-07	9.89795e-06	Hypothetical proteins	- none -	- none -	hypothetical protein
fig|6666666.293769.peg.609	75.9522	3.37205	0.685767	4.91719	8.77947e-07	1.034e-05	Hypothetical proteins	- none -	- none -	hypothetical protein
fig|6666666.293769.peg.3163	99.6345	-2.11484	0.430274	-4.9151	8.87389e-07	1.0386e-05	Hypothetical proteins	- none -	- none -	hypothetical protein
fig|6666666.293769.peg.2417	1956.85	-1.94941	0.396959	-4.91086	9.06776e-07	1.058e-05	Hypothetical proteins	- none -	- none -	hypothetical protein
fig|6666666.293769.peg.3226	430.842	-2.53901	0.518511	-4.89673	9.74429e-07	1.12298e-05	Hypothetical proteins	- none -	- none -	hypothetical protein
fig|6666666.293769.peg.2671	55.4866	-1.90867	0.389998	-4.89404	9.87847e-07	1.13497e-05	Hypothetical proteins	- none -	- none -	hypothetical protein
fig|6666666.293769.peg.706	317.951	2.04782	0.418492	4.89334	9.91381e-07	1.13555e-05	Hypothetical proteins	- none -	- none -	FIG00945414: hypothetical protein
fig|6666666.293769.peg.3131	444.906	-2.02218	0.413385	-4.89176	9.99371e-07	1.14123e-05	Hypothetical proteins	- none -	- none -	hypothetical protein
fig|6666666.293769.peg.3822	221.454	-2.65794	0.543432	-4.89101	1.00318e-06	1.14181e-05	Hypothetical proteins	- none -	- none -	hypothetical protein
fig|6666666.293769.peg.644	6309.29	-1.37391	0.280955	-4.89012	1.00772e-06	1.14181e-05	Hypothetical proteins	- none -	- none -	hypothetical protein
fig|6666666.293769.peg.3513	182.669	-1.88463	0.3864	-4.87739	1.07497e-06	1.20051e-05	Hypothetical proteins	- none -	- none -	hypothetical protein
fig|6666666.293769.peg.2944	537.409	-1.99938	0.409943	-4.87722	1.0759e-06	1.20051e-05	Hypothetical proteins	- none -	- none -	hypothetical protein
fig|6666666.293769.peg.2085	651.632	0.836459	0.171557	4.8757	1.08422e-06	1.20515e-05	Hypothetical proteins	- none -	- none -	hypothetical protein
fig|6666666.293769.peg.3552	283.397	-2.33053	0.478428	-4.87123	1.10905e-06	1.2255e-05	Hypothetical proteins	- none -	- none -	hypothetical protein
fig|6666666.293769.peg.3564	303.992	-2.23904	0.45978	-4.86981	1.11706e-06	1.23074e-05	Hypothetical proteins	- none -	- none -	hypothetical protein
fig|6666666.293769.peg.3797	106.429	-2.07764	0.427219	-4.86317	1.15523e-06	1.26536e-05	Hypothetical proteins	- none -	- none -	hypothetical protein
fig|6666666.293769.peg.205	23.1415	2.84995	0.586616	4.85828	1.18407e-06	1.28944e-05	Hypothetical proteins	- none -	- none -	hypothetical protein
fig|6666666.293769.peg.3827	61.8431	-2.08034	0.428897	-4.85045	1.23185e-06	1.32671e-05	Hypothetical proteins	- none -	- none -	hypothetical protein
fig|6666666.293769.peg.2492	438.622	-1.83657	0.378665	-4.85013	1.23383e-06	1.32671e-05	Hypothetical proteins	- none -	- none -	hypothetical protein
fig|6666666.293769.peg.3532	69.489	-2.19231	0.452043	-4.84979	1.23595e-06	1.32671e-05	Hypothetical proteins	- none -	- none -	hypothetical protein
fig|6666666.293769.peg.3930	240.057	-1.75181	0.361905	-4.84052	1.29499e-06	1.38282e-05	Hypothetical proteins	- none -	- none -	hypothetical protein
fig|6666666.293769.peg.2305	28.0483	-2.98321	0.616312	-4.84043	1.29559e-06	1.38282e-05	Hypothetical proteins	- none -	- none -	hypothetical protein
fig|6666666.293769.peg.4057	569.705	-3.39869	0.705341	-4.81851	1.44632e-06	1.53498e-05	Hypothetical proteins	- none -	- none -	hypothetical protein
fig|6666666.293769.peg.916	158.723	0.829207	0.172226	4.81464	1.47462e-06	1.5606e-05	Hypothetical proteins	- none -	- none -	hypothetical protein
fig|6666666.293769.peg.3903	163.246	-2.34792	0.487938	-4.81192	1.49491e-06	1.57763e-05	Hypothetical proteins	- none -	- none -	hypothetical protein
fig|6666666.293769.peg.2182	34.8814	-1.43019	0.297392	-4.80911	1.51604e-06	1.59545e-05	Hypothetical proteins	- none -	- none -	hypothetical protein
fig|6666666.293769.peg.3598	91.624	-1.91956	0.399362	-4.80656	1.53546e-06	1.61074e-05	Hypothetical proteins	- none -	- none -	hypothetical protein
fig|6666666.293769.peg.1204	81.0096	1.92496	0.401207	4.79792	1.60324e-06	1.67316e-05	Hypothetical proteins	- none -	- none -	hypothetical protein
fig|6666666.293769.peg.4137	488.218	-1.92335	0.402058	-4.78377	1.7204e-06	1.79046e-05	Hypothetical proteins	- none -	- none -	hypothetical protein
fig|6666666.293769.peg.3186	933.912	-2.12935	0.445607	-4.77854	1.76574e-06	1.8225e-05	Hypothetical proteins	- none -	- none -	hypothetical protein
fig|6666666.293769.peg.3799	58.841	-2.01787	0.422621	-4.77465	1.8002e-06	1.84232e-05	Hypothetical proteins	- none -	- none -	hypothetical protein
fig|6666666.293769.peg.1503	21.098	-2.26285	0.473979	-4.77416	1.80456e-06	1.84232e-05	Hypothetical proteins	- none -	- none -	hypothetical protein
fig|6666666.293769.peg.3121	807.28	-2.00285	0.419581	-4.77345	1.81097e-06	1.84385e-05	Hypothetical proteins	- none -	- none -	hypothetical protein
fig|6666666.293769.peg.2144	334.754	1.86334	0.391067	4.76476	1.89081e-06	1.91476e-05	Hypothetical proteins	- none -	- none -	hypothetical protein
fig|6666666.293769.peg.3110	248.679	-1.95832	0.41213	-4.75172	2.01694e-06	2.03154e-05	Hypothetical proteins	- none -	- none -	hypothetical protein
fig|6666666.293769.peg.2721	264.515	-2.20212	0.464331	-4.74256	2.11031e-06	2.11425e-05	Hypothetical proteins	- none -	- none -	hypothetical protein
fig|6666666.293769.peg.3656	582.784	-1.94941	0.411519	-4.7371	2.16793e-06	2.15474e-05	Hypothetical proteins	- none -	- none -	hypothetical protein
fig|6666666.293769.peg.809	1550.71	1.43347	0.302716	4.73534	2.18683e-06	2.16209e-05	Hypothetical proteins	- none -	- none -	hypothetical protein
fig|6666666.293769.peg.3227	103753	-1.82554	0.385607	-4.73421	2.19912e-06	2.16853e-05	Hypothetical proteins	- none -	- none -	hypothetical protein
fig|6666666.293769.peg.3414	112.598	-2.4903	0.526417	-4.73066	2.2379e-06	2.20099e-05	Hypothetical proteins	- none -	- none -	hypothetical protein
fig|6666666.293769.peg.2157	104.332	-1.93109	0.408278	-4.72984	2.24701e-06	2.20418e-05	Hypothetical proteins	- none -	- none -	hypothetical protein
fig|6666666.293769.peg.3578	61.5446	-1.97392	0.417429	-4.72876	2.25895e-06	2.20899e-05	Hypothetical proteins	- none -	- none -	hypothetical protein
fig|6666666.293769.peg.3904	13.8004	-2.47074	0.523087	-4.72337	2.31965e-06	2.25775e-05	Hypothetical proteins	- none -	- none -	hypothetical protein
fig|6666666.293769.peg.3949	87.8152	-2.01884	0.42793	-4.71769	2.38541e-06	2.30979e-05	Hypothetical proteins	- none -	- none -	hypothetical protein
fig|6666666.293769.peg.2640	73.7028	-2.22739	0.473238	-4.70671	2.51745e-06	2.40053e-05	Hypothetical proteins	- none -	- none -	hypothetical protein
fig|6666666.293769.peg.3225	117.889	-2.1213	0.452044	-4.69269	2.69642e-06	2.5582e-05	Hypothetical proteins	- none -	- none -	hypothetical protein
fig|6666666.293769.peg.1774	203.077	-2.2944	0.490044	-4.68203	2.84047e-06	2.66791e-05	Hypothetical proteins	- none -	- none -	hypothetical protein
fig|6666666.293769.peg.3592	488.866	-1.96522	0.420262	-4.67617	2.92281e-06	2.73159e-05	Hypothetical proteins	- none -	- none -	hypothetical protein
fig|6666666.293769.peg.2850	743.354	-1.79098	0.38338	-4.67154	2.98947e-06	2.78696e-05	Hypothetical proteins	- none -	- none -	hypothetical protein
fig|6666666.293769.peg.2162	46.7928	-2.73224	0.585413	-4.6672	3.05332e-06	2.83944e-05	Hypothetical proteins	- none -	- none -	hypothetical protein
fig|6666666.293769.peg.2154	191.231	1.01706	0.217968	4.66609	3.06979e-06	2.84771e-05	Hypothetical proteins	- none -	- none -	hypothetical protein
fig|6666666.293769.peg.4099	159.309	-2.07446	0.444944	-4.6623	3.12688e-06	2.89352e-05	Hypothetical proteins	- none -	- none -	hypothetical protein
fig|6666666.293769.peg.4008	12.1005	-3.26048	0.700818	-4.6524	3.28097e-06	3.02122e-05	Hypothetical proteins	- none -	- none -	hypothetical protein
fig|6666666.293769.peg.2001	62.2928	1.18998	0.255831	4.65143	3.29637e-06	3.02799e-05	Hypothetical proteins	- none -	- none -	hypothetical protein
fig|6666666.293769.peg.3591	274.976	-2.15964	0.464463	-4.64977	3.32307e-06	3.04506e-05	Hypothetical proteins	- none -	- none -	hypothetical protein
fig|6666666.293769.peg.656	166.846	1.43241	0.308264	4.64669	3.37307e-06	3.08337e-05	Hypothetical proteins	- none -	- none -	hypothetical protein
fig|6666666.293769.peg.2643	121.939	-1.58529	0.341253	-4.64548	3.39283e-06	3.09389e-05	Hypothetical proteins	- none -	- none -	hypothetical protein
fig|6666666.293769.peg.2914	86.2533	-2.22586	0.479355	-4.64345	3.42639e-06	3.11693e-05	Hypothetical proteins	- none -	- none -	hypothetical protein
fig|6666666.293769.peg.3983	314.693	-1.92192	0.414029	-4.64199	3.45063e-06	3.1314e-05	Hypothetical proteins	- none -	- none -	hypothetical protein
fig|6666666.293769.peg.3384	2662.19	4.13478	0.892156	4.63459	3.57639e-06	3.23771e-05	Hypothetical proteins	- none -	- none -	hypothetical protein
fig|6666666.293769.peg.3909	44.7969	-4.19215	0.904648	-4.63401	3.58652e-06	3.23908e-05	Hypothetical proteins	- none -	- none -	hypothetical protein
fig|6666666.293769.peg.3120	71.0034	-1.75164	0.378116	-4.63253	3.61224e-06	3.24855e-05	Hypothetical proteins	- none -	- none -	hypothetical protein
fig|6666666.293769.peg.2966	18.767	2.1184	0.457301	4.63241	3.61431e-06	3.24855e-05	Hypothetical proteins	- none -	- none -	hypothetical protein
fig|6666666.293769.peg.2155	143.738	1.7274	0.373244	4.62808	3.69077e-06	3.30936e-05	Hypothetical proteins	- none -	- none -	hypothetical protein
fig|6666666.293769.peg.3130	153.589	0.957326	0.206968	4.62547	3.73755e-06	3.34333e-05	Hypothetical proteins	- none -	- none -	hypothetical protein
fig|6666666.293769.peg.3984	1159.75	-2.17537	0.470488	-4.62365	3.77048e-06	3.35415e-05	Hypothetical proteins	- none -	- none -	hypothetical protein
fig|6666666.293769.peg.902	74.3922	2.3205	0.501912	4.62332	3.77643e-06	3.35415e-05	Hypothetical proteins	- none -	- none -	hypothetical protein
fig|6666666.293769.peg.3764	48.1714	-2.08994	0.452737	-4.61624	3.90754e-06	3.46241e-05	Hypothetical proteins	- none -	- none -	hypothetical protein
fig|6666666.293769.peg.3640	10.2058	-2.39715	0.520079	-4.6092	4.04229e-06	3.56006e-05	Hypothetical proteins	- none -	- none -	hypothetical protein
fig|6666666.293769.peg.2894	54.7422	-2.58773	0.561731	-4.60671	4.09097e-06	3.5827e-05	Hypothetical proteins	- none -	- none -	hypothetical protein
fig|6666666.293769.peg.2804	50.1183	-2.35432	0.511776	-4.60029	4.21911e-06	3.68633e-05	Hypothetical proteins	- none -	- none -	hypothetical protein
fig|6666666.293769.peg.3316	28.8881	-2.02791	0.440874	-4.59974	4.23016e-06	3.6874e-05	Hypothetical proteins	- none -	- none -	hypothetical protein
fig|6666666.293769.peg.3425	579.127	-1.83088	0.398226	-4.59759	4.274e-06	3.717e-05	Hypothetical proteins	- none -	- none -	hypothetical protein
fig|6666666.293769.peg.3782	127.397	-2.3366	0.508448	-4.59555	4.31601e-06	3.74487e-05	Hypothetical proteins	- none -	- none -	hypothetical protein
fig|6666666.293769.peg.2833	473.621	-1.9636	0.427337	-4.59496	4.32838e-06	3.74694e-05	Hypothetical proteins	- none -	- none -	hypothetical protein
fig|6666666.293769.peg.3576	66.5084	-1.58259	0.345425	-4.58159	4.6146e-06	3.97638e-05	Hypothetical proteins	- none -	- none -	hypothetical protein
fig|6666666.293769.peg.2645	25.0695	-1.99745	0.437608	-4.56448	5.00733e-06	4.30493e-05	Hypothetical proteins	- none -	- none -	hypothetical protein
fig|6666666.293769.peg.2331	375.581	1.11602	0.244619	4.56226	5.06051e-06	4.3245e-05	Hypothetical proteins	- none -	- none -	hypothetical protein
fig|6666666.293769.peg.2939	131.746	-2.19381	0.480968	-4.56124	5.0852e-06	4.33222e-05	Hypothetical proteins	- none -	- none -	hypothetical protein
fig|6666666.293769.peg.1958	40.6674	-2.23485	0.490608	-4.55527	5.23178e-06	4.42095e-05	Hypothetical proteins	- none -	- none -	hypothetical protein
fig|6666666.293769.peg.3985	598.626	-2.33147	0.511828	-4.55517	5.23423e-06	4.42095e-05	Hypothetical proteins	- none -	- none -	hypothetical protein
fig|6666666.293769.peg.1199	463.79	-0.984176	0.216061	-4.55509	5.23642e-06	4.42095e-05	Hypothetical proteins	- none -	- none -	hypothetical protein
fig|6666666.293769.peg.2315	47.8516	-1.95323	0.428876	-4.55429	5.25626e-06	4.42138e-05	Hypothetical proteins	- none -	- none -	hypothetical protein
fig|6666666.293769.peg.2445	37.1424	-2.85535	0.626982	-4.55412	5.26046e-06	4.42138e-05	Hypothetical proteins	- none -	- none -	hypothetical protein
fig|6666666.293769.peg.3541	53.9393	-2.27865	0.501975	-4.53937	5.64233e-06	4.69813e-05	Hypothetical proteins	- none -	- none -	hypothetical protein
fig|6666666.293769.peg.2311	52.1294	-2.18804	0.482022	-4.5393	5.64404e-06	4.69813e-05	Hypothetical proteins	- none -	- none -	hypothetical protein
fig|6666666.293769.peg.2352	581.385	-2.92399	0.644193	-4.539	5.65226e-06	4.69813e-05	Hypothetical proteins	- none -	- none -	hypothetical protein
fig|6666666.293769.peg.3432	29.5197	-2.4203	0.534004	-4.53236	5.83278e-06	4.81621e-05	Hypothetical proteins	- none -	- none -	hypothetical protein
fig|6666666.293769.peg.2851	687.535	-1.7037	0.376316	-4.52731	5.97392e-06	4.92193e-05	Hypothetical proteins	- none -	- none -	hypothetical protein
fig|6666666.293769.peg.3544	7391.79	-1.94161	0.429859	-4.51685	6.27676e-06	5.13765e-05	Hypothetical proteins	- none -	- none -	hypothetical protein
fig|6666666.293769.peg.1128	1731.52	-1.76338	0.390516	-4.51552	6.31617e-06	5.15866e-05	Hypothetical proteins	- none -	- none -	hypothetical protein
fig|6666666.293769.peg.3634	71.3705	-1.90005	0.421008	-4.5131	6.38859e-06	5.20649e-05	Hypothetical proteins	- none -	- none -	hypothetical protein
fig|6666666.293769.peg.352	118.85	-2.22584	0.493783	-4.50774	6.55221e-06	5.32828e-05	Hypothetical proteins	- none -	- none -	hypothetical protein
fig|6666666.293769.peg.3389	193.938	-1.76053	0.390742	-4.5056	6.61862e-06	5.37066e-05	Hypothetical proteins	- none -	- none -	hypothetical protein
fig|6666666.293769.peg.3511	30.2176	-3.18594	0.707665	-4.50204	6.73049e-06	5.44966e-05	Hypothetical proteins	- none -	- none -	hypothetical protein
fig|6666666.293769.peg.4140	157.386	-2.21471	0.492031	-4.50116	6.75836e-06	5.46046e-05	Hypothetical proteins	- none -	- none -	hypothetical protein
fig|6666666.293769.peg.3616	100.881	-1.67127	0.371352	-4.50049	6.77959e-06	5.46587e-05	Hypothetical proteins	- none -	- none -	hypothetical protein
fig|6666666.293769.peg.3631	54.046	-4.39086	0.977359	-4.49258	7.0365e-06	5.64874e-05	Hypothetical proteins	- none -	- none -	hypothetical protein
fig|6666666.293769.peg.3599	16.365	-2.33544	0.52035	-4.4882	7.18269e-06	5.75381e-05	Hypothetical proteins	- none -	- none -	hypothetical protein
fig|6666666.293769.peg.4124	141.745	-2.75281	0.613705	-4.48555	7.27262e-06	5.80111e-05	Hypothetical proteins	- none -	- none -	hypothetical protein
fig|6666666.293769.peg.3946	50.5823	-2.21915	0.4949	-4.48403	7.32457e-06	5.83018e-05	Hypothetical proteins	- none -	- none -	hypothetical protein
fig|6666666.293769.peg.2283	71.0004	1.69298	0.377789	4.48128	7.41975e-06	5.88902e-05	Hypothetical proteins	- none -	- none -	hypothetical protein
fig|6666666.293769.peg.3191	259.101	-1.72492	0.384942	-4.48099	7.42985e-06	5.88902e-05	Hypothetical proteins	- none -	- none -	hypothetical protein
fig|6666666.293769.peg.4192	62.4244	-1.81229	0.406214	-4.46141	8.14206e-06	6.38617e-05	Hypothetical proteins	- none -	- none -	hypothetical protein
fig|6666666.293769.peg.3713	88.4756	-1.91545	0.429454	-4.46019	8.18859e-06	6.40928e-05	Hypothetical proteins	- none -	- none -	hypothetical protein
fig|6666666.293769.peg.2918	284.438	-1.86149	0.417674	-4.45681	8.31891e-06	6.49774e-05	Hypothetical proteins	- none -	- none -	hypothetical protein
fig|6666666.293769.peg.1138	21.3473	1.86277	0.418253	4.45369	8.44086e-06	6.57932e-05	Hypothetical proteins	- none -	- none -	hypothetical protein
fig|6666666.293769.peg.3151	47.6029	-1.94717	0.437263	-4.45308	8.46474e-06	6.58427e-05	Hypothetical proteins	- none -	- none -	hypothetical protein
fig|6666666.293769.peg.3237	69.7782	-2.55121	0.572969	-4.45261	8.48328e-06	6.58506e-05	Hypothetical proteins	- none -	- none -	hypothetical protein
fig|6666666.293769.peg.3841	96.0543	-1.7722	0.39848	-4.44739	8.69214e-06	6.73327e-05	Hypothetical proteins	- none -	- none -	hypothetical protein
fig|6666666.293769.peg.3100	6.8516	3.16891	0.71274	4.44609	8.74464e-06	6.76e-05	Hypothetical proteins	- none -	- none -	hypothetical protein
fig|6666666.293769.peg.2448	11.0325	-2.74923	0.619131	-4.44047	8.97641e-06	6.91074e-05	Hypothetical proteins	- none -	- none -	hypothetical protein
fig|6666666.293769.peg.1163	11.7091	3.45046	0.777775	4.43632	9.15103e-06	7.01641e-05	Hypothetical proteins	- none -	- none -	hypothetical protein
fig|6666666.293769.peg.3987	26.5766	-2.50425	0.56475	-4.43425	9.23913e-06	7.06954e-05	Hypothetical proteins	- none -	- none -	hypothetical protein
fig|6666666.293769.peg.2843	369.537	-2.01461	0.454594	-4.43166	9.35084e-06	7.14047e-05	Hypothetical proteins	- none -	- none -	hypothetical protein
fig|6666666.293769.peg.4079	54.3172	-2.25747	0.509767	-4.42843	9.49216e-06	7.22025e-05	Hypothetical proteins	- none -	- none -	hypothetical protein
fig|6666666.293769.peg.2444	155.925	-3.46288	0.781971	-4.42839	9.49375e-06	7.22025e-05	Hypothetical proteins	- none -	- none -	hypothetical protein
fig|6666666.293769.peg.3374	50.7117	-1.93984	0.438301	-4.42582	9.60763e-06	7.27739e-05	Hypothetical proteins	- none -	- none -	hypothetical protein
fig|6666666.293769.peg.3123	32.3282	-2.00268	0.452667	-4.42418	9.68084e-06	7.31809e-05	Hypothetical proteins	- none -	- none -	hypothetical protein
fig|6666666.293769.peg.3160	27.3785	-2.12875	0.481541	-4.42071	9.83791e-06	7.40702e-05	Hypothetical proteins	- none -	- none -	hypothetical protein
fig|6666666.293769.peg.1312	252.607	1.68725	0.381758	4.41969	9.88415e-06	7.42695e-05	Hypothetical proteins	- none -	- none -	hypothetical protein
fig|6666666.293769.peg.3360	24.7374	1.29833	0.29463	4.40666	1.04977e-05	7.82538e-05	Hypothetical proteins	- none -	- none -	hypothetical protein
fig|6666666.293769.peg.3722	614.14	-2.20586	0.500652	-4.40598	1.05304e-05	7.83424e-05	Hypothetical proteins	- none -	- none -	hypothetical protein
fig|6666666.293769.peg.2646	202.911	-1.97532	0.448814	-4.4012	1.07656e-05	7.97755e-05	Hypothetical proteins	- none -	- none -	hypothetical protein
fig|6666666.293769.peg.3249	43.874	-2.04358	0.464398	-4.40048	1.0801e-05	7.98805e-05	Hypothetical proteins	- none -	- none -	hypothetical protein
fig|6666666.293769.peg.2717	70.9262	1.28744	0.292775	4.39738	1.09565e-05	8.08712e-05	Hypothetical proteins	- none -	- none -	hypothetical protein
fig|6666666.293769.peg.3912	980.503	-3.84245	0.874343	-4.39467	1.10941e-05	8.17265e-05	Hypothetical proteins	- none -	- none -	hypothetical protein
fig|6666666.293769.peg.3966	8.33944	-2.67583	0.609155	-4.39269	1.11956e-05	8.23127e-05	Hypothetical proteins	- none -	- none -	hypothetical protein
fig|6666666.293769.peg.3001	143.479	-1.72636	0.393455	-4.38768	1.14564e-05	8.40657e-05	Hypothetical proteins	- none -	- none -	hypothetical protein
fig|6666666.293769.peg.3010	267.502	-1.63888	0.373754	-4.38492	1.16028e-05	8.46442e-05	Hypothetical proteins	- none -	- none -	hypothetical protein
fig|6666666.293769.peg.3071	154.021	-2.11933	0.484683	-4.37261	1.2277e-05	8.90439e-05	Hypothetical proteins	- none -	- none -	hypothetical protein
fig|6666666.293769.peg.3843	200.242	-1.99678	0.456992	-4.36939	1.24592e-05	9.01913e-05	Hypothetical proteins	- none -	- none -	hypothetical protein
fig|6666666.293769.peg.4169	77.7988	-2.06182	0.472117	-4.36718	1.25858e-05	9.08605e-05	Hypothetical proteins	- none -	- none -	hypothetical protein
fig|6666666.293769.peg.3781	128.301	-2.069	0.473788	-4.36694	1.26e-05	9.08605e-05	Hypothetical proteins	- none -	- none -	hypothetical protein
fig|6666666.293769.peg.1987	835.053	-2.01114	0.460852	-4.36397	1.27726e-05	9.19284e-05	Hypothetical proteins	- none -	- none -	hypothetical protein
fig|6666666.293769.peg.3486	14.7274	-2.60677	0.597495	-4.36283	1.28393e-05	9.22316e-05	Hypothetical proteins	- none -	- none -	hypothetical protein
fig|6666666.293769.peg.3134	93.622	-2.20962	0.506577	-4.36186	1.2896e-05	9.24625e-05	Hypothetical proteins	- none -	- none -	hypothetical protein
fig|6666666.293769.peg.925	91.0623	-1.94778	0.447314	-4.3544	1.33431e-05	9.53045e-05	Hypothetical proteins	- none -	- none -	hypothetical protein
fig|6666666.293769.peg.3192	36.748	-1.96338	0.451078	-4.35263	1.34514e-05	9.57139e-05	Hypothetical proteins	- none -	- none -	hypothetical protein
fig|6666666.293769.peg.4121	33.8714	-2.41981	0.556325	-4.34965	1.36358e-05	9.62965e-05	Hypothetical proteins	- none -	- none -	hypothetical protein
fig|6666666.293769.peg.2773	1097.52	-1.70892	0.392999	-4.34841	1.37131e-05	9.65208e-05	Hypothetical proteins	- none -	- none -	hypothetical protein
fig|6666666.293769.peg.2919	167.525	-1.98507	0.456536	-4.34812	1.37309e-05	9.65208e-05	Hypothetical proteins	- none -	- none -	hypothetical protein
fig|6666666.293769.peg.4055	57.1206	-1.95584	0.449836	-4.3479	1.37446e-05	9.65208e-05	Hypothetical proteins	- none -	- none -	hypothetical protein
fig|6666666.293769.peg.3500	14.5924	-5.42045	1.24706	-4.3466	1.38265e-05	9.6877e-05	Hypothetical proteins	- none -	- none -	hypothetical protein
fig|6666666.293769.peg.2987	280.968	-2.36167	0.543434	-4.34582	1.38758e-05	9.68983e-05	Hypothetical proteins	- none -	- none -	hypothetical protein
fig|6666666.293769.peg.2424	648.896	-2.32861	0.537653	-4.33106	1.48392e-05	0.000102862	Hypothetical proteins	- none -	- none -	hypothetical protein
fig|6666666.293769.peg.4130	23.7055	-2.32152	0.536545	-4.3268	1.5129e-05	0.000104485	Hypothetical proteins	- none -	- none -	hypothetical protein
fig|6666666.293769.peg.3494	96.1854	-2.15884	0.499212	-4.3245	1.52876e-05	0.000105386	Hypothetical proteins	- none -	- none -	hypothetical protein
fig|6666666.293769.peg.2504	25.5273	-2.70913	0.626793	-4.32222	1.54468e-05	0.000106289	Hypothetical proteins	- none -	- none -	hypothetical protein
fig|6666666.293769.peg.3236	38.4047	-1.96092	0.453815	-4.32096	1.55352e-05	0.000106701	Hypothetical proteins	- none -	- none -	hypothetical protein
fig|6666666.293769.peg.3698	71.9281	-2.09177	0.484395	-4.3183	1.57233e-05	0.0001076	Hypothetical proteins	- none -	- none -	hypothetical protein
fig|6666666.293769.peg.3911	29.7097	-2.00906	0.466426	-4.30734	1.65227e-05	0.000112865	Hypothetical proteins	- none -	- none -	hypothetical protein
fig|6666666.293769.peg.4088	19.2539	3.17436	0.737578	4.30376	1.67923e-05	0.000114499	Hypothetical proteins	- none -	- none -	hypothetical protein
fig|6666666.293769.peg.745	88.0583	1.83551	0.426565	4.303	1.68497e-05	0.000114682	Hypothetical proteins	- none -	- none -	hypothetical protein
fig|6666666.293769.peg.2642	808.63	-2.21165	0.514329	-4.30008	1.7074e-05	0.000115998	Hypothetical proteins	- none -	- none -	hypothetical protein
fig|6666666.293769.peg.3487	82.2683	-1.98224	0.461142	-4.29853	1.71931e-05	0.000116597	Hypothetical proteins	- none -	- none -	hypothetical protein
fig|6666666.293769.peg.3762	13.8847	-2.40911	0.561024	-4.29413	1.75377e-05	0.00011819	Hypothetical proteins	- none -	- none -	hypothetical protein
fig|6666666.293769.peg.2488	210.776	-1.75741	0.409278	-4.29393	1.75538e-05	0.00011819	Hypothetical proteins	- none -	- none -	hypothetical protein
fig|6666666.293769.peg.1506	149.978	-2.06782	0.482722	-4.28366	1.83846e-05	0.000122902	Hypothetical proteins	- none -	- none -	hypothetical protein
fig|6666666.293769.peg.1356	45.9035	1.12499	0.262651	4.28321	1.84214e-05	0.000122929	Hypothetical proteins	- none -	- none -	hypothetical protein
fig|6666666.293769.peg.3898	36.2439	-2.36134	0.551381	-4.2826	1.84721e-05	0.000123049	Hypothetical proteins	- none -	- none -	hypothetical protein
fig|6666666.293769.peg.3111	98.0083	1.74224	0.406941	4.28132	1.85787e-05	0.000123322	Hypothetical proteins	- none -	- none -	FIG01205615: hypothetical protein
fig|6666666.293769.peg.3883	36.7007	-3.1181	0.730741	-4.26704	1.98083e-05	0.000130791	Hypothetical proteins	- none -	- none -	hypothetical protein
fig|6666666.293769.peg.3462	37.9595	-3.06685	0.719096	-4.26487	2.00023e-05	0.00013184	Hypothetical proteins	- none -	- none -	hypothetical protein
fig|6666666.293769.peg.4150	90.7466	-1.60116	0.375652	-4.26235	2.02285e-05	0.000133097	Hypothetical proteins	- none -	- none -	hypothetical protein
fig|6666666.293769.peg.1609	116.868	1.50922	0.354159	4.26143	2.03124e-05	0.000133415	Hypothetical proteins	- none -	- none -	hypothetical protein
fig|6666666.293769.peg.922	59.7949	-2.09259	0.491623	-4.2565	2.07655e-05	0.000136153	Hypothetical proteins	- none -	- none -	hypothetical protein
fig|6666666.293769.peg.2238	146.988	-2.04969	0.481669	-4.25538	2.08692e-05	0.000136357	Hypothetical proteins	- none -	- none -	hypothetical protein
fig|6666666.293769.peg.2164	953.426	-1.69225	0.399527	-4.23562	2.27917e-05	0.000148146	Hypothetical proteins	- none -	- none -	hypothetical protein
fig|6666666.293769.peg.2225	303.804	-1.92714	0.455522	-4.23061	2.33058e-05	0.000150966	Hypothetical proteins	- none -	- none -	hypothetical protein
fig|6666666.293769.peg.3066	45.1408	-2.45133	0.579693	-4.22867	2.35075e-05	0.00015201	Hypothetical proteins	- none -	- none -	hypothetical protein
fig|6666666.293769.peg.3957	51.9578	-1.87216	0.442812	-4.22788	2.35903e-05	0.000152283	Hypothetical proteins	- none -	- none -	hypothetical protein
fig|6666666.293769.peg.1078	2096.4	-3.20063	0.757334	-4.22618	2.37696e-05	0.000153177	Hypothetical proteins	- none -	- none -	hypothetical protein
fig|6666666.293769.peg.2909	24.2216	-2.61538	0.619521	-4.22163	2.42546e-05	0.000155769	Hypothetical proteins	- none -	- none -	hypothetical protein
fig|6666666.293769.peg.3668	186.504	-1.72323	0.409108	-4.21216	2.52944e-05	0.000161618	Hypothetical proteins	- none -	- none -	hypothetical protein
fig|6666666.293769.peg.3951	33.9454	-2.08049	0.494748	-4.20514	2.60916e-05	0.000166146	Hypothetical proteins	- none -	- none -	hypothetical protein
fig|6666666.293769.peg.2916	21.2752	2.1989	0.525484	4.18453	2.85758e-05	0.000181044	Hypothetical proteins	- none -	- none -	hypothetical protein
fig|6666666.293769.peg.3185	289.064	-2.0195	0.482923	-4.18183	2.89167e-05	0.000182896	Hypothetical proteins	- none -	- none -	hypothetical protein
fig|6666666.293769.peg.898	152.178	1.29426	0.309618	4.18018	2.91284e-05	0.000183925	Hypothetical proteins	- none -	- none -	hypothetical protein
fig|6666666.293769.peg.3738	785.098	-1.76379	0.422271	-4.1769	2.95507e-05	0.000185967	Hypothetical proteins	- none -	- none -	hypothetical protein
fig|6666666.293769.peg.3901	39.9182	-1.96288	0.470854	-4.16876	3.06267e-05	0.000192415	Hypothetical proteins	- none -	- none -	hypothetical protein
fig|6666666.293769.peg.2316	84.7789	-2.06373	0.495384	-4.16592	3.10106e-05	0.000194502	Hypothetical proteins	- none -	- none -	hypothetical protein
fig|6666666.293769.peg.4157	43.2463	-2.17587	0.522445	-4.16478	3.11647e-05	0.000195143	Hypothetical proteins	- none -	- none -	hypothetical protein
fig|6666666.293769.peg.3935	27.4611	-1.91602	0.46013	-4.16409	3.12597e-05	0.000195412	Hypothetical proteins	- none -	- none -	hypothetical protein
fig|6666666.293769.peg.3635	27.0181	-2.5236	0.606846	-4.15855	3.20276e-05	0.00019988	Hypothetical proteins	- none -	- none -	hypothetical protein
fig|6666666.293769.peg.3319	261.622	-1.72676	0.416366	-4.14721	3.36547e-05	0.000209368	Hypothetical proteins	- none -	- none -	hypothetical protein
fig|6666666.293769.peg.2397	9.86352	-2.56098	0.617524	-4.14718	3.36593e-05	0.000209368	Hypothetical proteins	- none -	- none -	hypothetical protein
fig|6666666.293769.peg.3016	17.4087	-2.00122	0.482814	-4.14491	3.39949e-05	0.000211105	Hypothetical proteins	- none -	- none -	hypothetical protein
fig|6666666.293769.peg.2027	15.8242	2.26369	0.546981	4.13852	3.49555e-05	0.000215291	Hypothetical proteins	- none -	- none -	hypothetical protein
fig|6666666.293769.peg.2577	2098.85	-1.65798	0.400748	-4.13721	3.51555e-05	0.000216131	Hypothetical proteins	- none -	- none -	hypothetical protein
fig|6666666.293769.peg.1986	300.924	-2.10754	0.51004	-4.1321	3.59462e-05	0.000220309	Hypothetical proteins	- none -	- none -	hypothetical protein
fig|6666666.293769.peg.3359	461.923	-0.754052	0.182731	-4.12657	3.6821e-05	0.000224938	Hypothetical proteins	- none -	- none -	hypothetical protein
fig|6666666.293769.peg.2196	75.7599	-2.22156	0.538433	-4.12597	3.69176e-05	0.000225161	Hypothetical proteins	- none -	- none -	hypothetical protein
fig|6666666.293769.peg.2503	161.221	-2.17603	0.529452	-4.10996	3.9572e-05	0.000240181	Hypothetical proteins	- none -	- none -	hypothetical protein
fig|6666666.293769.peg.2163	13.2048	-4.2692	1.03898	-4.10904	3.97313e-05	0.000240759	Hypothetical proteins	- none -	- none -	hypothetical protein
fig|6666666.293769.peg.1513	237.268	1.59647	0.388614	4.10811	3.98907e-05	0.000241336	Hypothetical proteins	- none -	- none -	hypothetical protein
fig|6666666.293769.peg.3776	47.5772	-2.53621	0.617846	-4.10493	4.04436e-05	0.000244287	Hypothetical proteins	- none -	- none -	hypothetical protein
fig|6666666.293769.peg.2601	338.05	-1.78284	0.434439	-4.10377	4.06466e-05	0.000244726	Hypothetical proteins	- none -	- none -	hypothetical protein
fig|6666666.293769.peg.1287	12.858	2.00367	0.488746	4.09962	4.13835e-05	0.000248765	Hypothetical proteins	- none -	- none -	hypothetical protein
fig|6666666.293769.peg.3965	16.948	-3.13969	0.766613	-4.09554	4.21189e-05	0.000251976	Hypothetical proteins	- none -	- none -	hypothetical protein
fig|6666666.293769.peg.4013	473.354	-2.09736	0.512378	-4.09339	4.2511e-05	0.000253514	Hypothetical proteins	- none -	- none -	hypothetical protein
fig|6666666.293769.peg.3936	7.19932	-2.15263	0.525938	-4.09293	4.25963e-05	0.00025362	Hypothetical proteins	- none -	- none -	hypothetical protein
fig|6666666.293769.peg.4081	240.508	-1.76846	0.432635	-4.08765	4.35765e-05	0.000259046	Hypothetical proteins	- none -	- none -	hypothetical protein
fig|6666666.293769.peg.2429	2244.73	0.585916	0.143408	4.08565	4.39533e-05	0.000260873	Hypothetical proteins	- none -	- none -	hypothetical protein
fig|6666666.293769.peg.3503	314.423	-1.19645	0.292892	-4.08496	4.40849e-05	0.000261041	Hypothetical proteins	- none -	- none -	hypothetical protein
fig|6666666.293769.peg.1090	255.578	1.09068	0.267035	4.08442	4.41871e-05	0.000261041	Hypothetical proteins	- none -	- none -	hypothetical protein
fig|6666666.293769.peg.2231	113.406	-3.14958	0.772419	-4.07755	4.55129e-05	0.00026746	Hypothetical proteins	- none -	- none -	hypothetical protein
fig|6666666.293769.peg.3830	34.917	-2.39082	0.586702	-4.07501	4.60116e-05	0.000269681	Hypothetical proteins	- none -	- none -	hypothetical protein
fig|6666666.293769.peg.2547	181.97	-1.91761	0.47086	-4.07256	4.64983e-05	0.000272109	Hypothetical proteins	- none -	- none -	hypothetical protein
fig|6666666.293769.peg.3448	27.4946	-2.28946	0.562475	-4.07033	4.69474e-05	0.000273884	Hypothetical proteins	- none -	- none -	hypothetical protein
fig|6666666.293769.peg.3641	137.576	-1.73496	0.426432	-4.06856	4.73046e-05	0.00027554	Hypothetical proteins	- none -	- none -	hypothetical protein
fig|6666666.293769.peg.3218	146.878	-2.20876	0.543115	-4.06684	4.76554e-05	0.000277154	Hypothetical proteins	- none -	- none -	hypothetical protein
fig|6666666.293769.peg.4145	69.7929	-1.55339	0.382075	-4.06567	4.78939e-05	0.000277931	Hypothetical proteins	- none -	- none -	hypothetical protein
fig|6666666.293769.peg.3653	173.208	-1.58465	0.389782	-4.06546	4.79371e-05	0.000277931	Hypothetical proteins	- none -	- none -	hypothetical protein
fig|6666666.293769.peg.1080	219.939	-1.42977	0.351928	-4.06266	4.85167e-05	0.000279571	Hypothetical proteins	- none -	- none -	hypothetical protein
fig|6666666.293769.peg.4127	43.6086	-2.24949	0.553718	-4.06252	4.85449e-05	0.000279571	Hypothetical proteins	- none -	- none -	hypothetical protein
fig|6666666.293769.peg.949	482.484	-2.37913	0.585661	-4.0623	4.85919e-05	0.000279571	Hypothetical proteins	- none -	- none -	hypothetical protein
fig|6666666.293769.peg.3011	65.5471	-1.65113	0.40661	-4.06073	4.89203e-05	0.000280601	Hypothetical proteins	- none -	- none -	hypothetical protein
fig|6666666.293769.peg.3840	255.622	-1.85318	0.456943	-4.0556	5.00064e-05	0.000285523	Hypothetical proteins	- none -	- none -	hypothetical protein
fig|6666666.293769.peg.3758	8.31271	-3.82719	0.9448	-4.05079	5.10446e-05	0.000290128	Hypothetical proteins	- none -	- none -	hypothetical protein
fig|6666666.293769.peg.1037	27.0408	1.88471	0.465523	4.04859	5.15273e-05	0.000291255	Hypothetical proteins	- none -	- none -	hypothetical protein
fig|6666666.293769.peg.1956	46.7899	-2.00271	0.494683	-4.04847	5.15531e-05	0.000291255	Hypothetical proteins	- none -	- none -	hypothetical protein
fig|6666666.293769.peg.3182	134.246	-1.75489	0.433981	-4.04371	5.26119e-05	0.000296791	Hypothetical proteins	- none -	- none -	hypothetical protein
fig|6666666.293769.peg.1135	56.5055	1.66857	0.413285	4.03734	5.40613e-05	0.000304054	Hypothetical proteins	- none -	- none -	hypothetical protein
fig|6666666.293769.peg.4072	744.527	-3.79349	0.940105	-4.03518	5.45605e-05	0.000305946	Hypothetical proteins	- none -	- none -	hypothetical protein
fig|6666666.293769.peg.1240	7.6832	-2.53126	0.628273	-4.02892	5.60343e-05	0.000313742	Hypothetical proteins	- none -	- none -	hypothetical protein
fig|6666666.293769.peg.3217	45.5285	-2.36313	0.587409	-4.02297	5.74688e-05	0.000321295	Hypothetical proteins	- none -	- none -	hypothetical protein
fig|6666666.293769.peg.3583	10.7504	-2.12445	0.528297	-4.02132	5.78737e-05	0.000322599	Hypothetical proteins	- none -	- none -	hypothetical protein
fig|6666666.293769.peg.250	18113.7	-2.57185	0.639663	-4.02064	5.80403e-05	0.000323048	Hypothetical proteins	- none -	- none -	hypothetical protein
fig|6666666.293769.peg.4119	30.2613	-1.92446	0.478754	-4.01972	5.82677e-05	0.000323834	Hypothetical proteins	- none -	- none -	hypothetical protein
fig|6666666.293769.peg.4089	310.801	-1.76394	0.438923	-4.0188	5.84965e-05	0.000324625	Hypothetical proteins	- none -	- none -	hypothetical protein
fig|6666666.293769.peg.3775	13.7744	-2.36571	0.589505	-4.01304	5.99408e-05	0.000331724	Hypothetical proteins	- none -	- none -	hypothetical protein
fig|6666666.293769.peg.2028	22.0993	1.55386	0.388397	4.00069	6.31567e-05	0.000348429	Hypothetical proteins	- none -	- none -	hypothetical protein
fig|6666666.293769.peg.3492	117.642	-2.28328	0.570815	-4.00004	6.33322e-05	0.000348884	Hypothetical proteins	- none -	- none -	hypothetical protein
fig|6666666.293769.peg.3998	16.4535	-1.99964	0.500025	-3.99907	6.35905e-05	0.000349283	Hypothetical proteins	- none -	- none -	hypothetical protein
fig|6666666.293769.peg.3999	25.5967	-1.78506	0.446466	-3.99819	6.38287e-05	0.000350079	Hypothetical proteins	- none -	- none -	hypothetical protein
fig|6666666.293769.peg.3135	26.014	-2.0196	0.505334	-3.99656	6.42696e-05	0.000351984	Hypothetical proteins	- none -	- none -	hypothetical protein
fig|6666666.293769.peg.1021	89.1965	1.25989	0.315381	3.99482	6.47439e-05	0.000354065	Hypothetical proteins	- none -	- none -	hypothetical protein
fig|6666666.293769.peg.2250	117.48	-1.7797	0.44556	-3.9943	6.48847e-05	0.00035432	Hypothetical proteins	- none -	- none -	hypothetical protein
fig|6666666.293769.peg.2835	1823.77	-1.72173	0.431206	-3.99283	6.52889e-05	0.000356009	Hypothetical proteins	- none -	- none -	hypothetical protein
fig|6666666.293769.peg.3296	19.0345	-2.31819	0.581009	-3.98995	6.60885e-05	0.000359327	Hypothetical proteins	- none -	- none -	hypothetical protein
fig|6666666.293769.peg.3829	140.241	-1.86668	0.468625	-3.98332	6.79602e-05	0.000368969	Hypothetical proteins	- none -	- none -	hypothetical protein
fig|6666666.293769.peg.1222	21.6442	1.83022	0.459678	3.98153	6.84739e-05	0.000371221	Hypothetical proteins	- none -	- none -	hypothetical protein
fig|6666666.293769.peg.628	612.028	-1.07328	0.269605	-3.98092	6.86476e-05	0.000371627	Hypothetical proteins	- none -	- none -	hypothetical protein
fig|6666666.293769.peg.3275	22.3132	-3.25025	0.818113	-3.97286	7.10147e-05	0.000382787	Hypothetical proteins	- none -	- none -	hypothetical protein
fig|6666666.293769.peg.2349	1295.05	0.570834	0.14385	3.96825	7.24015e-05	0.000388589	Hypothetical proteins	- none -	- none -	hypothetical protein
fig|6666666.293769.peg.2995	18.1714	-2.80179	0.708969	-3.95191	7.75291e-05	0.000413159	Hypothetical proteins	- none -	- none -	hypothetical protein
fig|6666666.293769.peg.3726	33.9856	-1.92654	0.487988	-3.94793	7.88303e-05	0.000419498	Hypothetical proteins	- none -	- none -	hypothetical protein
fig|6666666.293769.peg.3881	42.2886	-4.18896	1.06132	-3.94693	7.91582e-05	0.000420647	Hypothetical proteins	- none -	- none -	hypothetical protein
fig|6666666.293769.peg.3097	98.1534	-2.27336	0.576619	-3.94256	8.06156e-05	0.000426581	Hypothetical proteins	- none -	- none -	hypothetical protein
fig|6666666.293769.peg.1988	361.788	-1.90956	0.48439	-3.94219	8.07394e-05	0.000426595	Hypothetical proteins	- none -	- none -	hypothetical protein
fig|6666666.293769.peg.1903	210.102	-2.02271	0.513304	-3.94058	8.12857e-05	0.000428318	Hypothetical proteins	- none -	- none -	hypothetical protein
fig|6666666.293769.peg.811	62.6309	1.064	0.27109	3.92489	8.67678e-05	0.000455925	Hypothetical proteins	- none -	- none -	hypothetical protein
fig|6666666.293769.peg.3285	39.4456	1.22925	0.314098	3.91358	9.09374e-05	0.000475838	Hypothetical proteins	- none -	- none -	hypothetical protein
fig|6666666.293769.peg.2124	820.408	-2.0054	0.512596	-3.91224	9.14433e-05	0.00047705	Hypothetical proteins	- none -	- none -	hypothetical protein
fig|6666666.293769.peg.2946	21.0355	-3.85027	0.984232	-3.91196	9.155e-05	0.00047705	Hypothetical proteins	- none -	- none -	hypothetical protein
fig|6666666.293769.peg.1628	36.8322	-1.60118	0.410296	-3.90249	9.5208e-05	0.000494056	Hypothetical proteins	- none -	- none -	hypothetical protein
fig|6666666.293769.peg.934	18.1652	2.36351	0.60624	3.89863	9.67366e-05	0.000499917	Hypothetical proteins	- none -	- none -	hypothetical protein
fig|6666666.293769.peg.2160	93.4385	-2.52239	0.647714	-3.89429	9.8487e-05	0.000508263	Hypothetical proteins	- none -	- none -	hypothetical protein
fig|6666666.293769.peg.857	755.148	-1.40482	0.361023	-3.89121	9.97469e-05	0.000513355	Hypothetical proteins	- none -	- none -	hypothetical protein
fig|6666666.293769.peg.999	68.4559	1.36495	0.350949	3.88932	0.000100527	0.00051666	Hypothetical proteins	- none -	- none -	hypothetical protein
fig|6666666.293769.peg.3382	4847.1	-1.79467	0.461545	-3.8884	0.000100909	0.000517915	Hypothetical proteins	- none -	- none -	hypothetical protein
fig|6666666.293769.peg.2541	25.1668	2.02344	0.520435	3.88798	0.000101081	0.000518091	Hypothetical proteins	- none -	- none -	hypothetical protein
fig|6666666.293769.peg.945	9.89267	2.95614	0.760462	3.8873	0.000101366	0.000518263	Hypothetical proteins	- none -	- none -	hypothetical protein
fig|6666666.293769.peg.2647	459.252	-1.87756	0.484438	-3.87576	0.000106294	0.000541119	Hypothetical proteins	- none -	- none -	hypothetical protein
fig|6666666.293769.peg.774	34.5209	2.38926	0.616665	3.87448	0.000106852	0.000542493	Hypothetical proteins	- none -	- none -	hypothetical protein
fig|6666666.293769.peg.1509	531.087	-1.61317	0.416579	-3.87243	0.000107757	0.000546345	Hypothetical proteins	- none -	- none -	hypothetical protein
fig|6666666.293769.peg.2019	62.9881	1.49475	0.38605	3.87192	0.000107983	0.000546755	Hypothetical proteins	- none -	- none -	hypothetical protein
fig|6666666.293769.peg.3880	50.1659	-2.55212	0.659308	-3.8709	0.000108433	0.000548293	Hypothetical proteins	- none -	- none -	hypothetical protein
fig|6666666.293769.peg.145	185.694	1.17855	0.305268	3.8607	0.000113064	0.00057094	Hypothetical proteins	- none -	- none -	hypothetical protein
fig|6666666.293769.peg.2327	153.169	-1.64307	0.425852	-3.85831	0.000114176	0.000575593	Hypothetical proteins	- none -	- none -	hypothetical protein
fig|6666666.293769.peg.3938	87.3039	-2.10268	0.54501	-3.85806	0.000114291	0.000575593	Hypothetical proteins	- none -	- none -	hypothetical protein
fig|6666666.293769.peg.3728	214.225	-1.78591	0.463397	-3.85396	0.000116222	0.000584534	Hypothetical proteins	- none -	- none -	hypothetical protein
fig|6666666.293769.peg.4032	458.395	-1.60996	0.417815	-3.85328	0.000116547	0.000585386	Hypothetical proteins	- none -	- none -	hypothetical protein
fig|6666666.293769.peg.3148	102.583	-2.02861	0.527201	-3.84789	0.000119138	0.000597202	Hypothetical proteins	- none -	- none -	hypothetical protein
fig|6666666.293769.peg.615	29.6442	1.83449	0.47731	3.84339	0.000121344	0.000606971	Hypothetical proteins	- none -	- none -	hypothetical protein
fig|6666666.293769.peg.3801	70.2337	-1.85708	0.483225	-3.8431	0.000121491	0.000606971	Hypothetical proteins	- none -	- none -	hypothetical protein
fig|6666666.293769.peg.1371	97.558	1.46754	0.382448	3.83724	0.000124426	0.000619514	Hypothetical proteins	- none -	- none -	hypothetical protein
fig|6666666.293769.peg.2219	30.0083	1.47448	0.38427	3.8371	0.000124496	0.000619514	Hypothetical proteins	- none -	- none -	hypothetical protein
fig|6666666.293769.peg.2632	5.33568	-3.61701	0.943211	-3.83479	0.000125674	0.000623721	Hypothetical proteins	- none -	- none -	hypothetical protein
fig|6666666.293769.peg.2593	241.171	0.970814	0.253513	3.82945	0.00012843	0.00063479	Hypothetical proteins	- none -	- none -	hypothetical protein
fig|6666666.293769.peg.4007	219.034	-2.34289	0.612601	-3.8245	0.000131036	0.000646064	Hypothetical proteins	- none -	- none -	hypothetical protein
fig|6666666.293769.peg.3730	30.4107	-2.19439	0.574426	-3.82014	0.000133375	0.000656736	Hypothetical proteins	- none -	- none -	hypothetical protein
fig|6666666.293769.peg.4096	48.954	-1.64538	0.431208	-3.81574	0.000135774	0.000666583	Hypothetical proteins	- none -	- none -	hypothetical protein
fig|6666666.293769.peg.4092	80.59	-1.69762	0.444928	-3.8155	0.000135907	0.000666583	Hypothetical proteins	- none -	- none -	hypothetical protein
fig|6666666.293769.peg.4207	16.6163	-2.59359	0.679864	-3.81486	0.000136258	0.000667433	Hypothetical proteins	- none -	- none -	hypothetical protein
fig|6666666.293769.peg.3586	36.0072	-1.89468	0.496836	-3.81349	0.000137016	0.0006694	Hypothetical proteins	- none -	- none -	hypothetical protein
fig|6666666.293769.peg.3164	70.8643	0.739615	0.194355	3.80548	0.000141531	0.000688772	Hypothetical proteins	- none -	- none -	hypothetical protein
fig|6666666.293769.peg.807	59.0619	1.94356	0.511329	3.80099	0.000144121	0.000699566	Hypothetical proteins	- none -	- none -	FIG00909789: hypothetical protein
fig|6666666.293769.peg.3942	340.308	-1.90202	0.500562	-3.79978	0.000144827	0.000702086	Hypothetical proteins	- none -	- none -	hypothetical protein
fig|6666666.293769.peg.1886	11.0136	2.15487	0.568371	3.79131	0.000149858	0.000724601	Hypothetical proteins	- none -	- none -	hypothetical protein
fig|6666666.293769.peg.2744	492.755	-2.10236	0.554647	-3.79045	0.000150373	0.000726159	Hypothetical proteins	- none -	- none -	hypothetical protein
fig|6666666.293769.peg.938	669.92	-0.903106	0.238642	-3.78435	0.000154108	0.000743241	Hypothetical proteins	- none -	- none -	hypothetical protein
fig|6666666.293769.peg.2681	29.2897	-2.2534	0.596304	-3.77894	0.000157497	0.000757228	Hypothetical proteins	- none -	- none -	hypothetical protein
fig|6666666.293769.peg.743	87.216	-0.835152	0.221012	-3.77876	0.000157613	0.000757228	Hypothetical proteins	- none -	- none -	hypothetical protein
fig|6666666.293769.peg.163	188.083	-0.919659	0.243679	-3.77406	0.000160611	0.000768684	Hypothetical proteins	- none -	- none -	hypothetical protein
fig|6666666.293769.peg.3862	17.6278	3.32953	0.882359	3.77344	0.000161014	0.000769629	Hypothetical proteins	- none -	- none -	hypothetical protein
fig|6666666.293769.peg.825	96.4624	1.43746	0.382248	3.76054	0.000169545	0.000808352	Hypothetical proteins	- none -	- none -	hypothetical protein
fig|6666666.293769.peg.4177	3.91536	-3.70381	0.985407	-3.75866	0.000170823	0.000813411	Hypothetical proteins	- none -	- none -	hypothetical protein
fig|6666666.293769.peg.878	379.439	1.34008	0.35726	3.75099	0.000176134	0.000836583	Hypothetical proteins	- none -	- none -	hypothetical protein
fig|6666666.293769.peg.1785	44.5575	-2.02201	0.539587	-3.74734	0.000178721	0.000845659	Hypothetical proteins	- none -	- none -	hypothetical protein
fig|6666666.293769.peg.1501	122.783	0.897812	0.23962	3.74682	0.000179089	0.000846337	Hypothetical proteins	- none -	- none -	hypothetical protein
fig|6666666.293769.peg.3900	247.601	-1.59663	0.426561	-3.74302	0.00018182	0.000858163	Hypothetical proteins	- none -	- none -	hypothetical protein
fig|6666666.293769.peg.2383	185.125	-1.56396	0.41825	-3.7393	0.000184531	0.000869864	Hypothetical proteins	- none -	- none -	hypothetical protein
fig|6666666.293769.peg.3580	35.6299	-2.07129	0.554045	-3.73848	0.000185135	0.000871617	Hypothetical proteins	- none -	- none -	hypothetical protein
fig|6666666.293769.peg.4049	18.4819	-2.93396	0.785879	-3.73335	0.000188946	0.000887339	Hypothetical proteins	- none -	- none -	hypothetical protein
fig|6666666.293769.peg.4141	566.224	-1.19473	0.320169	-3.73157	0.000190291	0.000890314	Hypothetical proteins	- none -	- none -	hypothetical protein
fig|6666666.293769.peg.2199	80.2804	1.56952	0.421018	3.72792	0.000193069	0.00090219	Hypothetical proteins	- none -	- none -	hypothetical protein
fig|6666666.293769.peg.1957	36.7654	-1.94608	0.522148	-3.72707	0.000193718	0.000904098	Hypothetical proteins	- none -	- none -	hypothetical protein
fig|6666666.293769.peg.464	242.372	1.05739	0.284084	3.72212	0.000197558	0.000919041	Hypothetical proteins	- none -	- none -	hypothetical protein
fig|6666666.293769.peg.2555	8.47532	-2.61798	0.703874	-3.71938	0.00019971	0.000927457	Hypothetical proteins	- none -	- none -	hypothetical protein
fig|6666666.293769.peg.1963	309.193	0.880783	0.236873	3.71837	0.000200514	0.000930037	Hypothetical proteins	- none -	- none -	hypothetical protein
fig|6666666.293769.peg.589	211.491	0.785439	0.211535	3.71305	0.000204773	0.000947456	Hypothetical proteins	- none -	- none -	hypothetical protein
fig|6666666.293769.peg.711	33.2215	2.65931	0.716267	3.71274	0.00020503	0.000947476	Hypothetical proteins	- none -	- none -	hypothetical protein
fig|6666666.293769.peg.2342	52.5929	-1.68318	0.453746	-3.70953	0.000207646	0.000956035	Hypothetical proteins	- none -	- none -	hypothetical protein
fig|6666666.293769.peg.2095	67.9937	-1.63155	0.439984	-3.70821	0.000208733	0.000959866	Hypothetical proteins	- none -	- none -	hypothetical protein
fig|6666666.293769.peg.1009	11.6743	2.18899	0.590564	3.70661	0.000210054	0.000964757	Hypothetical proteins	- none -	- none -	hypothetical protein
fig|6666666.293769.peg.469	27.733	1.7685	0.477593	3.70295	0.000213109	0.000977596	Hypothetical proteins	- none -	- none -	hypothetical protein
fig|6666666.293769.peg.4006	21.2219	-2.1923	0.592292	-3.70139	0.000214426	0.000981239	Hypothetical proteins	- none -	- none -	hypothetical protein
fig|6666666.293769.peg.3180	125.024	-2.18202	0.589703	-3.70019	0.000215434	0.000984656	Hypothetical proteins	- none -	- none -	hypothetical protein
fig|6666666.293769.peg.812	57.8939	1.62411	0.439126	3.69851	0.000216872	0.000988822	Hypothetical proteins	- none -	- none -	hypothetical protein
fig|6666666.293769.peg.527	51.8882	1.59913	0.432707	3.69563	0.000219341	0.000998213	Hypothetical proteins	- none -	- none -	hypothetical protein
fig|6666666.293769.peg.3603	6.44489	-3.38167	0.915471	-3.69391	0.000220832	0.0010008	Hypothetical proteins	- none -	- none -	hypothetical protein
fig|6666666.293769.peg.3306	436.01	-1.37326	0.371906	-3.69251	0.000222055	0.00100463	Hypothetical proteins	- none -	- none -	hypothetical protein
fig|6666666.293769.peg.3159	3.15621	-6.3457	1.71862	-3.69233	0.000222211	0.00100463	Hypothetical proteins	- none -	- none -	hypothetical protein
fig|6666666.293769.peg.3488	28.6266	-2.45086	0.663905	-3.69159	0.000222859	0.001006	Hypothetical proteins	- none -	- none -	hypothetical protein
fig|6666666.293769.peg.3787	78.487	-1.73776	0.470763	-3.69137	0.00022305	0.001006	Hypothetical proteins	- none -	- none -	hypothetical protein
fig|6666666.293769.peg.877	107.732	1.56493	0.425239	3.68012	0.000233128	0.00104643	Hypothetical proteins	- none -	- none -	hypothetical protein
fig|6666666.293769.peg.2911	117.039	-1.84524	0.501494	-3.67949	0.000233698	0.00104774	Hypothetical proteins	- none -	- none -	hypothetical protein
fig|6666666.293769.peg.2380	26.1577	-2.30446	0.626384	-3.679	0.000234153	0.00104853	Hypothetical proteins	- none -	- none -	hypothetical protein
fig|6666666.293769.peg.2989	233.153	1.08057	0.294486	3.66934	0.000243174	0.00108504	Hypothetical proteins	- none -	- none -	hypothetical protein
fig|6666666.293769.peg.1504	131.322	-1.74517	0.475848	-3.66749	0.000244942	0.00109164	Hypothetical proteins	- none -	- none -	hypothetical protein
fig|6666666.293769.peg.2670	51.1478	1.47545	0.402842	3.6626	0.000249669	0.00110744	Hypothetical proteins	- none -	- none -	hypothetical protein
fig|6666666.293769.peg.3954	23.6063	-2.03666	0.556308	-3.66103	0.000251199	0.00111161	Hypothetical proteins	- none -	- none -	hypothetical protein
fig|6666666.293769.peg.1149	86.2785	1.23855	0.338458	3.65938	0.000252822	0.00111747	Hypothetical proteins	- none -	- none -	hypothetical protein
fig|6666666.293769.peg.3590	50.5006	-1.82576	0.49924	-3.65707	0.000255111	0.00112627	Hypothetical proteins	- none -	- none -	hypothetical protein
fig|6666666.293769.peg.690	239.509	-1.31497	0.359987	-3.65282	0.000259374	0.00113973	Hypothetical proteins	- none -	- none -	hypothetical protein
fig|6666666.293769.peg.2556	11.3101	-2.65773	0.728731	-3.64706	0.000265257	0.00116286	Hypothetical proteins	- none -	- none -	hypothetical protein
fig|6666666.293769.peg.3007	10.8204	-2.05679	0.564448	-3.6439	0.000268539	0.00117451	Hypothetical proteins	- none -	- none -	hypothetical protein
fig|6666666.293769.peg.3790	101.92	-1.29309	0.355532	-3.63706	0.000275771	0.00120378	Hypothetical proteins	- none -	- none -	hypothetical protein
fig|6666666.293769.peg.148	2312.02	0.489363	0.134553	3.63696	0.000275872	0.00120378	Hypothetical proteins	- none -	- none -	hypothetical protein
fig|6666666.293769.peg.1272	80.3547	1.35214	0.373072	3.62435	0.000289694	0.00125245	Hypothetical proteins	- none -	- none -	hypothetical protein
fig|6666666.293769.peg.4161	102.793	-1.65286	0.456708	-3.61907	0.000295666	0.00127096	Hypothetical proteins	- none -	- none -	hypothetical protein
fig|6666666.293769.peg.3381	87.8997	-1.72223	0.47646	-3.61465	0.000300758	0.00128989	Hypothetical proteins	- none -	- none -	hypothetical protein
fig|6666666.293769.peg.4005	21.7867	-1.77526	0.491195	-3.61417	0.000301315	0.00129081	Hypothetical proteins	- none -	- none -	hypothetical protein
fig|6666666.293769.peg.1317	86.0756	1.30169	0.360424	3.61155	0.000304378	0.00129949	Hypothetical proteins	- none -	- none -	hypothetical protein
fig|6666666.293769.peg.3190	66.6256	-1.7238	0.477834	-3.60752	0.000309134	0.00131531	Hypothetical proteins	- none -	- none -	hypothetical protein
fig|6666666.293769.peg.1220	6.02662	3.74014	1.03721	3.60596	0.000311007	0.00131838	Hypothetical proteins	- none -	- none -	hypothetical protein
fig|6666666.293769.peg.1124	15.3851	2.04326	0.566874	3.60444	0.000312828	0.00132353	Hypothetical proteins	- none -	- none -	hypothetical protein
fig|6666666.293769.peg.3199	19.2979	3.22862	0.896061	3.60313	0.000314406	0.00132722	Hypothetical proteins	- none -	- none -	hypothetical protein
fig|6666666.293769.peg.3075	27.0703	-2.10281	0.58386	-3.60157	0.000316307	0.00133225	Hypothetical proteins	- none -	- none -	hypothetical protein
fig|6666666.293769.peg.2323	35.9255	-1.67572	0.465995	-3.59601	0.00032313	0.00135039	Hypothetical proteins	- none -	- none -	hypothetical protein
fig|6666666.293769.peg.3934	7.43351	-3.3737	0.938675	-3.59411	0.000325499	0.00135878	Hypothetical proteins	- none -	- none -	hypothetical protein
fig|6666666.293769.peg.2469	316.121	0.982224	0.273569	3.59041	0.000330162	0.00137639	Hypothetical proteins	- none -	- none -	hypothetical protein
fig|6666666.293769.peg.121	252.562	1.26902	0.353471	3.59018	0.000330451	0.00137639	Hypothetical proteins	- none -	- none -	hypothetical protein
fig|6666666.293769.peg.1887	932.047	0.552665	0.153965	3.58955	0.000331243	0.00137816	Hypothetical proteins	- none -	- none -	hypothetical protein
fig|6666666.293769.peg.4070	28.7166	-2.58626	0.720946	-3.58732	0.000334093	0.00138695	Hypothetical proteins	- none -	- none -	hypothetical protein
fig|6666666.293769.peg.3044	47.9564	1.11037	0.309641	3.58597	0.000335824	0.00139259	Hypothetical proteins	- none -	- none -	hypothetical protein
fig|6666666.293769.peg.3928	48.2298	-0.969978	0.270582	-3.58478	0.000337366	0.00139745	Hypothetical proteins	- none -	- none -	hypothetical protein
fig|6666666.293769.peg.3826	56.9409	-2.86503	0.799288	-3.58448	0.000337752	0.00139748	Hypothetical proteins	- none -	- none -	hypothetical protein
fig|6666666.293769.peg.3792	73.0958	1.5369	0.429812	3.57576	0.000349212	0.00143766	Hypothetical proteins	- none -	- none -	hypothetical protein
fig|6666666.293769.peg.174	53.3298	1.31375	0.367761	3.57229	0.000353877	0.00145461	Hypothetical proteins	- none -	- none -	hypothetical protein
fig|6666666.293769.peg.4148	43.552	-2.14001	0.599582	-3.56917	0.000358111	0.00147041	Hypothetical proteins	- none -	- none -	hypothetical protein
fig|6666666.293769.peg.3691	36.8377	-2.01924	0.565861	-3.56844	0.000359116	0.00147132	Hypothetical proteins	- none -	- none -	hypothetical protein
fig|6666666.293769.peg.1488	6382.45	-0.896485	0.251505	-3.56448	0.000364582	0.00148684	Hypothetical proteins	- none -	- none -	hypothetical protein
fig|6666666.293769.peg.1642	58.2463	1.54121	0.432406	3.56426	0.000364883	0.00148684	Hypothetical proteins	- none -	- none -	hypothetical protein
fig|6666666.293769.peg.3553	103.127	-1.82682	0.513012	-3.56097	0.000369492	0.00149992	Hypothetical proteins	- none -	- none -	hypothetical protein
fig|6666666.293769.peg.950	450.805	-2.07766	0.583475	-3.56083	0.000369685	0.00149992	Hypothetical proteins	- none -	- none -	hypothetical protein
fig|6666666.293769.peg.948	259.242	-2.43409	0.685541	-3.55062	0.000384328	0.00155261	Hypothetical proteins	- none -	- none -	hypothetical protein
fig|6666666.293769.peg.829	277.305	-1.36185	0.383554	-3.55062	0.000384329	0.00155261	Hypothetical proteins	- none -	- none -	hypothetical protein
fig|6666666.293769.peg.4204	42.0975	1.82383	0.513787	3.54978	0.000385546	0.00155585	Hypothetical proteins	- none -	- none -	hypothetical protein
fig|6666666.293769.peg.2913	32.66	-1.60167	0.451592	-3.54671	0.000390069	0.00157073	Hypothetical proteins	- none -	- none -	hypothetical protein
fig|6666666.293769.peg.3621	38.9874	-1.82723	0.515641	-3.54361	0.000394687	0.00158592	Hypothetical proteins	- none -	- none -	hypothetical protein
fig|6666666.293769.peg.2378	531.129	1.04706	0.295777	3.54003	0.000400076	0.00160586	Hypothetical proteins	- none -	- none -	hypothetical protein
fig|6666666.293769.peg.4085	16.8213	-2.56762	0.725387	-3.53965	0.000400662	0.0016065	Hypothetical proteins	- none -	- none -	hypothetical protein
fig|6666666.293769.peg.3439	126.579	1.61264	0.45599	3.53657	0.000405355	0.00162185	Hypothetical proteins	- none -	- none -	hypothetical protein
fig|6666666.293769.peg.3885	504.244	-1.95044	0.552008	-3.53335	0.000410333	0.00163828	Hypothetical proteins	- none -	- none -	hypothetical protein
fig|6666666.293769.peg.2981	16.6961	-1.84664	0.523236	-3.52926	0.000416724	0.00166027	Hypothetical proteins	- none -	- none -	hypothetical protein
fig|6666666.293769.peg.3435	42.5375	-2.14798	0.609805	-3.52241	0.000427636	0.00169834	Hypothetical proteins	- none -	- none -	hypothetical protein
fig|6666666.293769.peg.1641	66.2834	1.18843	0.337709	3.51909	0.000433036	0.00171435	Hypothetical proteins	- none -	- none -	hypothetical protein
fig|6666666.293769.peg.2902	134.835	-2.01562	0.573176	-3.51658	0.000437137	0.00172694	Hypothetical proteins	- none -	- none -	hypothetical protein
fig|6666666.293769.peg.2002	40.3969	1.41935	0.403845	3.51458	0.000440451	0.00173821	Hypothetical proteins	- none -	- none -	hypothetical protein
fig|6666666.293769.peg.3519	33.203	-1.85547	0.528025	-3.51398	0.000441454	0.00174034	Hypothetical proteins	- none -	- none -	hypothetical protein
fig|6666666.293769.peg.3675	454.677	-1.42044	0.404412	-3.51236	0.00044414	0.00174909	Hypothetical proteins	- none -	- none -	hypothetical protein
fig|6666666.293769.peg.2673	188.961	1.16728	0.332732	3.50817	0.000451196	0.00177502	Hypothetical proteins	- none -	- none -	hypothetical protein
fig|6666666.293769.peg.3447	6.21793	-3.31144	0.944336	-3.50663	0.000453817	0.00178346	Hypothetical proteins	- none -	- none -	hypothetical protein
fig|6666666.293769.peg.2740	51.4451	-1.91032	0.544959	-3.50544	0.00045586	0.00178775	Hypothetical proteins	- none -	- none -	hypothetical protein
fig|6666666.293769.peg.3546	110.225	-1.7966	0.512713	-3.50411	0.00045813	0.00179478	Hypothetical proteins	- none -	- none -	hypothetical protein
fig|6666666.293769.peg.3507	62.7614	-1.77773	0.507647	-3.5019	0.000461951	0.00180384	Hypothetical proteins	- none -	- none -	hypothetical protein
fig|6666666.293769.peg.1258	63.1573	1.59108	0.456591	3.48469	0.0004927	0.00191029	Hypothetical proteins	- none -	- none -	hypothetical protein
fig|6666666.293769.peg.3458	52.2071	-2.04393	0.586884	-3.48269	0.000496405	0.00192	Hypothetical proteins	- none -	- none -	hypothetical protein
fig|6666666.293769.peg.2920	353.328	-1.76031	0.505451	-3.48265	0.000496477	0.00192	Hypothetical proteins	- none -	- none -	hypothetical protein
fig|6666666.293769.peg.2340	208.101	-1.89814	0.54505	-3.48251	0.000496737	0.00192	Hypothetical proteins	- none -	- none -	hypothetical protein
fig|6666666.293769.peg.306	110.434	0.644509	0.185094	3.48207	0.000497554	0.00192118	Hypothetical proteins	- none -	- none -	hypothetical protein
fig|6666666.293769.peg.3754	111.31	-1.93562	0.556426	-3.47866	0.000503921	0.00194178	Hypothetical proteins	- none -	- none -	hypothetical protein
fig|6666666.293769.peg.2324	100.055	-1.42345	0.409485	-3.47619	0.000508599	0.00195579	Hypothetical proteins	- none -	- none -	hypothetical protein
fig|6666666.293769.peg.4155	46.7634	-3.53698	1.01812	-3.47402	0.000512727	0.00196965	Hypothetical proteins	- none -	- none -	hypothetical protein
fig|6666666.293769.peg.1669	21.0329	-1.61336	0.464475	-3.47351	0.000513698	0.00197136	Hypothetical proteins	- none -	- none -	hypothetical protein
fig|6666666.293769.peg.2565	216.862	1.39162	0.400718	3.47281	0.000515038	0.00197449	Hypothetical proteins	- none -	- none -	hypothetical protein
fig|6666666.293769.peg.529	134.649	1.45074	0.418308	3.46812	0.000524115	0.00200724	Hypothetical proteins	- none -	- none -	hypothetical protein
fig|6666666.293769.peg.4009	27.3081	-3.48343	1.00558	-3.46412	0.000531974	0.0020328	Hypothetical proteins	- none -	- none -	hypothetical protein
fig|6666666.293769.peg.1668	230.533	-1.74017	0.502373	-3.4639	0.000532414	0.0020328	Hypothetical proteins	- none -	- none -	hypothetical protein
fig|6666666.293769.peg.4023	2339.86	-1.84753	0.533836	-3.46085	0.000538471	0.00205384	Hypothetical proteins	- none -	- none -	hypothetical protein
fig|6666666.293769.peg.3152	59.9264	-1.63703	0.473514	-3.4572	0.000545814	0.00207974	Hypothetical proteins	- none -	- none -	hypothetical protein
fig|6666666.293769.peg.2672	174.602	-2.08587	0.604114	-3.45278	0.000554843	0.002112	Hypothetical proteins	- none -	- none -	hypothetical protein
fig|6666666.293769.peg.1241	22.9833	-2.64564	0.766407	-3.45201	0.000556436	0.00211592	Hypothetical proteins	- none -	- none -	hypothetical protein
fig|6666666.293769.peg.409	464.056	-0.620227	0.179782	-3.44989	0.000560819	0.00212828	Hypothetical proteins	- none -	- none -	hypothetical protein
fig|6666666.293769.peg.3304	49.7661	-1.49436	0.433224	-3.44939	0.000561855	0.00213006	Hypothetical proteins	- none -	- none -	hypothetical protein
fig|6666666.293769.peg.2332	71.2219	1.08733	0.315275	3.44884	0.00056299	0.00213221	Hypothetical proteins	- none -	- none -	hypothetical protein
fig|6666666.293769.peg.3803	41.3297	-1.49474	0.43345	-3.44848	0.000563749	0.00213294	Hypothetical proteins	- none -	- none -	hypothetical protein
fig|6666666.293769.peg.2239	90	-2.39366	0.694718	-3.44552	0.000569972	0.00215431	Hypothetical proteins	- none -	- none -	hypothetical protein
fig|6666666.293769.peg.2849	21.9169	-1.96433	0.570564	-3.44278	0.000575767	0.00217403	Hypothetical proteins	- none -	- none -	hypothetical protein
fig|6666666.293769.peg.2718	94.3038	0.74625	0.217201	3.43576	0.000590898	0.00222223	Hypothetical proteins	- none -	- none -	hypothetical protein
fig|6666666.293769.peg.3913	40.0053	-1.73315	0.505316	-3.42984	0.00060393	0.00226444	Hypothetical proteins	- none -	- none -	hypothetical protein
fig|6666666.293769.peg.3087	10.6616	2.25445	0.658333	3.42448	0.000615978	0.00230272	Hypothetical proteins	- none -	- none -	hypothetical protein
fig|6666666.293769.peg.3096	16.5832	-2.46296	0.719929	-3.42112	0.000623642	0.00232812	Hypothetical proteins	- none -	- none -	hypothetical protein
fig|6666666.293769.peg.2540	1540.77	0.737436	0.215733	3.41828	0.000630176	0.00234645	Hypothetical proteins	- none -	- none -	hypothetical protein
fig|6666666.293769.peg.3115	26.1063	-2.45262	0.718144	-3.41523	0.000637291	0.0023706	Hypothetical proteins	- none -	- none -	hypothetical protein
fig|6666666.293769.peg.4090	31.1144	-2.04566	0.599869	-3.41017	0.000649218	0.00241257	Hypothetical proteins	- none -	- none -	hypothetical protein
fig|6666666.293769.peg.2687	33.3543	-1.84072	0.540514	-3.40549	0.000660443	0.00244944	Hypothetical proteins	- none -	- none -	hypothetical protein
fig|6666666.293769.peg.1304	31.793	1.4093	0.414547	3.3996	0.000674834	0.00249543	Hypothetical proteins	- none -	- none -	hypothetical protein
fig|6666666.293769.peg.141	214.032	-1.16556	0.342999	-3.39815	0.000678437	0.00250382	Hypothetical proteins	- none -	- none -	hypothetical protein
fig|6666666.293769.peg.654	33.7958	1.80996	0.534003	3.38942	0.000700395	0.00257979	Hypothetical proteins	- none -	- none -	hypothetical protein
fig|6666666.293769.peg.815	63.3194	1.2743	0.377667	3.37414	0.000740473	0.00272207	Hypothetical proteins	- none -	- none -	hypothetical protein
fig|6666666.293769.peg.2934	193.174	-1.19157	0.353218	-3.37346	0.0007423	0.00272612	Hypothetical proteins	- none -	- none -	hypothetical protein
fig|6666666.293769.peg.3759	192.481	-1.61929	0.480675	-3.36879	0.000754981	0.00276189	Hypothetical proteins	- none -	- none -	hypothetical protein
fig|6666666.293769.peg.924	83.1742	-1.67087	0.496477	-3.36546	0.000764174	0.0027928	Hypothetical proteins	- none -	- none -	hypothetical protein
fig|6666666.293769.peg.3630	58.9462	-2.32825	0.692372	-3.36271	0.000771808	0.00281796	Hypothetical proteins	- none -	- none -	hypothetical protein
fig|6666666.293769.peg.3309	12.3587	-1.90115	0.565885	-3.3596	0.000780555	0.002844	Hypothetical proteins	- none -	- none -	hypothetical protein
fig|6666666.293769.peg.3303	22.6564	-1.7426	0.51873	-3.35937	0.000781211	0.002844	Hypothetical proteins	- none -	- none -	hypothetical protein
fig|6666666.293769.peg.3964	24.8415	-1.9038	0.567226	-3.35634	0.000789826	0.00287258	Hypothetical proteins	- none -	- none -	hypothetical protein
fig|6666666.293769.peg.1845	175.692	1.15427	0.344336	3.35215	0.000801854	0.00291351	Hypothetical proteins	- none -	- none -	FIG00635626: hypothetical protein
fig|6666666.293769.peg.3619	3377.39	-1.80462	0.539333	-3.34603	0.000819782	0.0029729	Hypothetical proteins	- none -	- none -	hypothetical protein
fig|6666666.293769.peg.951	482.532	-2.00078	0.600954	-3.32934	0.000870528	0.00314478	Hypothetical proteins	- none -	- none -	hypothetical protein
fig|6666666.293769.peg.882	170.559	1.59559	0.479545	3.3273	0.00087692	0.00316179	Hypothetical proteins	- none -	- none -	hypothetical protein
fig|6666666.293769.peg.2197	717.758	-2.19427	0.659873	-3.32529	0.000883268	0.00318163	Hypothetical proteins	- none -	- none -	hypothetical protein
fig|6666666.293769.peg.819	7.43422	3.2241	0.972006	3.31695	0.000910053	0.00326247	Hypothetical proteins	- none -	- none -	hypothetical protein
fig|6666666.293769.peg.3639	8.61628	-2.01043	0.606524	-3.31467	0.000917502	0.00328604	Hypothetical proteins	- none -	- none -	hypothetical protein
fig|6666666.293769.peg.290	4951.51	-1.75864	0.531399	-3.30945	0.0009348	0.00333844	Hypothetical proteins	- none -	- none -	hypothetical protein
fig|6666666.293769.peg.282	73.4533	0.969797	0.293489	3.30437	0.000951906	0.00338898	Hypothetical proteins	- none -	- none -	hypothetical protein
fig|6666666.293769.peg.960	104.353	1.18443	0.359288	3.29662	0.000978553	0.0034673	Hypothetical proteins	- none -	- none -	hypothetical protein
fig|6666666.293769.peg.3452	3.67747	-3.18719	0.967724	-3.29349	0.000989518	0.00349729	Hypothetical proteins	- none -	- none -	hypothetical protein
fig|6666666.293769.peg.1324	240.905	2.59904	0.789784	3.29082	0.000998965	0.00352074	Hypothetical proteins	- none -	- none -	hypothetical protein
fig|6666666.293769.peg.959	92.472	1.30089	0.395502	3.2892	0.00100472	0.0035344	Hypothetical proteins	- none -	- none -	hypothetical protein
fig|6666666.293769.peg.3329	20.1832	-1.89497	0.577466	-3.28153	0.00103245	0.00362514	Hypothetical proteins	- none -	- none -	hypothetical protein
fig|6666666.293769.peg.2844	32.6534	-1.75436	0.534936	-3.27957	0.00103965	0.00364701	Hypothetical proteins	- none -	- none -	hypothetical protein
fig|6666666.293769.peg.1077	141.07	-2.50676	0.766101	-3.2721	0.00106753	0.00374134	Hypothetical proteins	- none -	- none -	hypothetical protein
fig|6666666.293769.peg.686	450.121	-1.56068	0.477396	-3.26915	0.00107871	0.00377497	Hypothetical proteins	- none -	- none -	hypothetical protein
fig|6666666.293769.peg.46	174.68	-2.18	0.667666	-3.26511	0.00109421	0.00381705	Hypothetical proteins	- none -	- none -	hypothetical protein
fig|6666666.293769.peg.4097	18.9424	-2.4561	0.753416	-3.25995	0.00111432	0.00387638	Hypothetical proteins	- none -	- none -	hypothetical protein
fig|6666666.293769.peg.3476	5.74547	-2.15655	0.661634	-3.25943	0.00111638	0.00387996	Hypothetical proteins	- none -	- none -	hypothetical protein
fig|6666666.293769.peg.1685	63.5628	0.809748	0.248688	3.25609	0.0011296	0.00391865	Hypothetical proteins	- none -	- none -	hypothetical protein
fig|6666666.293769.peg.3352	66.1866	-1.59142	0.489217	-3.253	0.00114192	0.00395409	Hypothetical proteins	- none -	- none -	hypothetical protein
fig|6666666.293769.peg.3692	23.7395	-1.90759	0.586786	-3.25092	0.00115034	0.00397591	Hypothetical proteins	- none -	- none -	hypothetical protein
fig|6666666.293769.peg.2715	196.28	-0.499745	0.153833	-3.24863	0.00115962	0.00400433	Hypothetical proteins	- none -	- none -	hypothetical protein
fig|6666666.293769.peg.2677	3.1676	-4.35956	1.34236	-3.24769	0.00116346	0.00401022	Hypothetical proteins	- none -	- none -	hypothetical protein
fig|6666666.293769.peg.1382	8.82651	3.08462	0.950475	3.24535	0.00117307	0.00403224	Hypothetical proteins	- none -	- none -	hypothetical protein
fig|6666666.293769.peg.2546	98.5291	-1.38689	0.427487	-3.24429	0.00117746	0.00403991	Hypothetical proteins	- none -	- none -	hypothetical protein
fig|6666666.293769.peg.2097	441.312	-1.41764	0.437286	-3.24192	0.00118729	0.00405584	Hypothetical proteins	- none -	- none -	hypothetical protein
fig|6666666.293769.peg.3702	10.8054	-1.9081	0.589243	-3.23822	0.00120278	0.00410059	Hypothetical proteins	- none -	- none -	hypothetical protein
fig|6666666.293769.peg.2548	62.8205	-1.65083	0.509992	-3.23697	0.00120805	0.00411481	Hypothetical proteins	- none -	- none -	hypothetical protein
fig|6666666.293769.peg.4038	3.25431	-5.44219	1.68195	-3.23565	0.00121367	0.00412649	Hypothetical proteins	- none -	- none -	hypothetical protein
fig|6666666.293769.peg.1989	49.4666	-1.67474	0.518038	-3.23286	0.00122559	0.00416324	Hypothetical proteins	- none -	- none -	hypothetical protein
fig|6666666.293769.peg.1538	101.287	0.886414	0.275342	3.21933	0.00128493	0.00432957	Hypothetical proteins	- none -	- none -	hypothetical protein
fig|6666666.293769.peg.2688	20.5286	-3.34892	1.04328	-3.20998	0.00132744	0.00444626	Hypothetical proteins	- none -	- none -	hypothetical protein
fig|6666666.293769.peg.2531	14.3482	1.43772	0.448277	3.20722	0.00134026	0.00447986	Hypothetical proteins	- none -	- none -	hypothetical protein
fig|6666666.293769.peg.1771	1720.13	-1.1492	0.358359	-3.20684	0.00134199	0.00448166	Hypothetical proteins	- none -	- none -	hypothetical protein
fig|6666666.293769.peg.3760	255.097	-1.54862	0.483071	-3.20578	0.00134698	0.00449434	Hypothetical proteins	- none -	- none -	hypothetical protein
fig|6666666.293769.peg.939	196.81	0.733807	0.229071	3.2034	0.00135815	0.00452758	Hypothetical proteins	- none -	- none -	hypothetical protein
fig|6666666.293769.peg.2705	132.429	-1.48035	0.463223	-3.19575	0.00139466	0.00462466	Hypothetical proteins	- none -	- none -	hypothetical protein
fig|6666666.293769.peg.4054	114.932	-2.13968	0.669723	-3.19487	0.00139895	0.00463071	Hypothetical proteins	- none -	- none -	hypothetical protein
fig|6666666.293769.peg.2942	63.5223	-1.89287	0.593149	-3.19122	0.00141673	0.00468072	Hypothetical proteins	- none -	- none -	hypothetical protein
fig|6666666.293769.peg.2393	15415.3	-0.960768	0.301086	-3.191	0.0014178	0.00468072	Hypothetical proteins	- none -	- none -	hypothetical protein
fig|6666666.293769.peg.1805	116.887	-0.660057	0.207137	-3.18657	0.00143969	0.00473838	Hypothetical proteins	- none -	- none -	hypothetical protein
fig|6666666.293769.peg.3859	588.041	-1.54164	0.483813	-3.18645	0.00144031	0.00473838	Hypothetical proteins	- none -	- none -	hypothetical protein
fig|6666666.293769.peg.3806	95.652	-2.86802	0.901476	-3.18147	0.00146531	0.00481254	Hypothetical proteins	- none -	- none -	hypothetical protein
fig|6666666.293769.peg.641	39.131	1.28074	0.402566	3.18145	0.00146541	0.00481254	Hypothetical proteins	- none -	- none -	hypothetical protein
fig|6666666.293769.peg.1114	561.59	-1.12679	0.354462	-3.17888	0.00147844	0.0048511	Hypothetical proteins	- none -	- none -	hypothetical protein
fig|6666666.293769.peg.2075	67.6178	-1.09555	0.34527	-3.17303	0.00150859	0.00494025	Hypothetical proteins	- none -	- none -	hypothetical protein
fig|6666666.293769.peg.2793	6.60337	3.99753	1.26268	3.16592	0.00154592	0.00504606	Hypothetical proteins	- none -	- none -	hypothetical protein
fig|6666666.293769.peg.2683	6.40226	-2.90242	0.920552	-3.15291	0.00161651	0.00526732	Hypothetical proteins	- none -	- none -	hypothetical protein
fig|6666666.293769.peg.1712	32.4127	1.33113	0.422701	3.14911	0.0016377	0.00532782	Hypothetical proteins	- none -	- none -	hypothetical protein
fig|6666666.293769.peg.1461	30.7579	-2.40396	0.763633	-3.14806	0.00164357	0.00534159	Hypothetical proteins	- none -	- none -	hypothetical protein
fig|6666666.293769.peg.2560	5.65991	-2.77061	0.880258	-3.1475	0.00164672	0.00534258	Hypothetical proteins	- none -	- none -	hypothetical protein
fig|6666666.293769.peg.2391	10.2633	2.56037	0.813787	3.14625	0.00165379	0.00535739	Hypothetical proteins	- none -	- none -	hypothetical protein
fig|6666666.293769.peg.1795	19.8442	1.71722	0.545897	3.14569	0.00165694	0.00536187	Hypothetical proteins	- none -	- none -	hypothetical protein
fig|6666666.293769.peg.3043	47.356	1.2151	0.386504	3.14382	0.00166758	0.00539167	Hypothetical proteins	- none -	- none -	hypothetical protein
fig|6666666.293769.peg.2651	43.681	1.7795	0.567173	3.13749	0.00170399	0.00549046	Hypothetical proteins	- none -	- none -	hypothetical protein
fig|6666666.293769.peg.3474	7.07601	-2.21866	0.707233	-3.1371	0.0017063	0.00549322	Hypothetical proteins	- none -	- none -	hypothetical protein
fig|6666666.293769.peg.704	326.401	0.707847	0.225919	3.13319	0.00172918	0.00556133	Hypothetical proteins	- none -	- none -	hypothetical protein
fig|6666666.293769.peg.2395	151.226	0.848787	0.271616	3.12495	0.00177837	0.00569592	Hypothetical proteins	- none -	- none -	hypothetical protein
fig|6666666.293769.peg.1066	87.5462	0.906945	0.290403	3.12306	0.00178983	0.00572775	Hypothetical proteins	- none -	- none -	hypothetical protein
fig|6666666.293769.peg.3833	17.4487	-2.58316	0.82735	-3.12221	0.00179501	0.00573945	Hypothetical proteins	- none -	- none -	hypothetical protein
fig|6666666.293769.peg.2938	82.998	1.29985	0.416556	3.12048	0.00180558	0.00576834	Hypothetical proteins	- none -	- none -	hypothetical protein
fig|6666666.293769.peg.3418	10.8933	-1.89238	0.606928	-3.11796	0.00182109	0.00581294	Hypothetical proteins	- none -	- none -	hypothetical protein
fig|6666666.293769.peg.3783	184.583	-2.56456	0.822786	-3.11692	0.00182753	0.00582854	Hypothetical proteins	- none -	- none -	hypothetical protein
fig|6666666.293769.peg.3811	14.2132	1.81827	0.583524	3.11602	0.00183312	0.00584143	Hypothetical proteins	- none -	- none -	hypothetical protein
fig|6666666.293769.peg.2679	7.02202	-3.01892	0.970856	-3.10954	0.00187378	0.00594578	Hypothetical proteins	- none -	- none -	hypothetical protein
fig|6666666.293769.peg.570	528.196	-0.913824	0.294008	-3.10816	0.00188257	0.00596863	Hypothetical proteins	- none -	- none -	hypothetical protein
fig|6666666.293769.peg.298	47.9514	1.00771	0.32477	3.10283	0.00191679	0.00606686	Hypothetical proteins	- none -	- none -	COG1683: Uncharacterized conserved protein / FIG143828: Hypothetical protein YbgA
fig|6666666.293769.peg.672	11.3478	-1.97929	0.638409	-3.10034	0.00193298	0.00610268	Hypothetical proteins	- none -	- none -	hypothetical protein
fig|6666666.293769.peg.1980	13.6159	2.80128	0.904436	3.09726	0.00195317	0.00616127	Hypothetical proteins	- none -	- none -	hypothetical protein
fig|6666666.293769.peg.451	91.7282	0.955856	0.308789	3.0955	0.0019648	0.00618757	Hypothetical proteins	- none -	- none -	hypothetical protein
fig|6666666.293769.peg.935	19.4681	1.57242	0.508339	3.09326	0.00197971	0.00622407	Hypothetical proteins	- none -	- none -	hypothetical protein
fig|6666666.293769.peg.685	13.0479	-1.95212	0.631647	-3.09052	0.00199803	0.00626595	Hypothetical proteins	- none -	- none -	hypothetical protein
fig|6666666.293769.peg.1524	99.8489	1.44843	0.46874	3.09004	0.00200129	0.00627093	Hypothetical proteins	- none -	- none -	hypothetical protein
fig|6666666.293769.peg.240	34.0642	0.911444	0.295006	3.08958	0.00200442	0.00627549	Hypothetical proteins	- none -	- none -	hypothetical protein
fig|6666666.293769.peg.3119	19.9757	-2.02368	0.655685	-3.08636	0.00202624	0.0063357	Hypothetical proteins	- none -	- none -	hypothetical protein
fig|6666666.293769.peg.1073	257.305	1.30789	0.423779	3.08624	0.00202702	0.0063357	Hypothetical proteins	- none -	- none -	hypothetical protein
fig|6666666.293769.peg.3527	233.841	-1.76605	0.573285	-3.08058	0.002066	0.00643612	Hypothetical proteins	- none -	- none -	hypothetical protein
fig|6666666.293769.peg.463	201.651	0.683953	0.222149	3.07881	0.0020783	0.00646477	Hypothetical proteins	- none -	- none -	hypothetical protein
fig|6666666.293769.peg.410	151.086	-0.698675	0.227128	-3.07613	0.00209704	0.00651121	Hypothetical proteins	- none -	- none -	hypothetical protein
fig|6666666.293769.peg.1661	41.457	1.52169	0.496688	3.06366	0.00218644	0.00677104	Hypothetical proteins	- none -	- none -	hypothetical protein
fig|6666666.293769.peg.3484	13.2492	2.44569	0.798342	3.06346	0.00218793	0.00677104	Hypothetical proteins	- none -	- none -	hypothetical protein
fig|6666666.293769.peg.1335	26.5795	1.75844	0.574097	3.06296	0.00219161	0.00677128	Hypothetical proteins	- none -	- none -	hypothetical protein
fig|6666666.293769.peg.2103	79.2708	1.13872	0.372302	3.05858	0.00222389	0.00686536	Hypothetical proteins	- none -	- none -	hypothetical protein
fig|6666666.293769.peg.2728	492.881	-1.34349	0.439356	-3.05786	0.00222922	0.00687616	Hypothetical proteins	- none -	- none -	hypothetical protein
fig|6666666.293769.peg.3565	5.90983	-3.6476	1.1941	-3.05468	0.00225303	0.00693821	Hypothetical proteins	- none -	- none -	hypothetical protein
fig|6666666.293769.peg.2928	49.1592	-1.86208	0.60979	-3.05364	0.00226084	0.00695656	Hypothetical proteins	- none -	- none -	hypothetical protein
fig|6666666.293769.peg.3098	35.5013	1.13681	0.372444	3.0523	0.00227092	0.00698187	Hypothetical proteins	- none -	- none -	hypothetical protein
fig|6666666.293769.peg.2600	313.317	-0.713732	0.233908	-3.05133	0.00227829	0.00699879	Hypothetical proteins	- none -	- none -	hypothetical protein
fig|6666666.293769.peg.1739	600.076	1.12074	0.367516	3.0495	0.00229223	0.00703588	Hypothetical proteins	- none -	- none -	hypothetical protein
fig|6666666.293769.peg.4191	21.8882	-1.9786	0.649046	-3.04847	0.00230008	0.00705422	Hypothetical proteins	- none -	- none -	hypothetical protein
fig|6666666.293769.peg.3481	15.0604	1.73576	0.569913	3.04565	0.00232176	0.0071149	Hypothetical proteins	- none -	- none -	hypothetical protein
fig|6666666.293769.peg.2858	672.756	-1.07504	0.353311	-3.04276	0.00234416	0.00717767	Hypothetical proteins	- none -	- none -	hypothetical protein
fig|6666666.293769.peg.2662	338.39	0.917154	0.301762	3.03932	0.00237109	0.00724832	Hypothetical proteins	- none -	- none -	hypothetical protein
fig|6666666.293769.peg.3587	44.7574	-1.75273	0.5774	-3.03556	0.00240091	0.00732755	Hypothetical proteins	- none -	- none -	hypothetical protein
fig|6666666.293769.peg.4018	29.878	-1.71444	0.564856	-3.03518	0.00240394	0.00733084	Hypothetical proteins	- none -	- none -	hypothetical protein
fig|6666666.293769.peg.2745	57.1325	-2.04856	0.676947	-3.02617	0.00247673	0.00754058	Hypothetical proteins	- none -	- none -	hypothetical protein
fig|6666666.293769.peg.3408	16.5363	-1.74159	0.577595	-3.01523	0.00256781	0.00780522	Hypothetical proteins	- none -	- none -	hypothetical protein
fig|6666666.293769.peg.1218	433.798	0.73486	0.243904	3.0129	0.00258762	0.00785272	Hypothetical proteins	- none -	- none -	hypothetical protein
fig|6666666.293769.peg.1001	41.9356	1.34057	0.445125	3.01168	0.00259809	0.00787815	Hypothetical proteins	- none -	- none -	hypothetical protein
fig|6666666.293769.peg.1608	182.125	0.91518	0.303976	3.0107	0.00260647	0.00789719	Hypothetical proteins	- none -	- none -	hypothetical protein
fig|6666666.293769.peg.669	29.4563	1.10671	0.367705	3.00979	0.0026143	0.00791452	Hypothetical proteins	- none -	- none -	hypothetical protein
fig|6666666.293769.peg.216	4.24739	2.6214	0.871052	3.00947	0.00261704	0.00791645	Hypothetical proteins	- none -	- none -	hypothetical protein
fig|6666666.293769.peg.153	657.326	0.69135	0.229766	3.00894	0.00262164	0.00792398	Hypothetical proteins	- none -	- none -	hypothetical protein
fig|6666666.293769.peg.3547	370.284	-1.3859	0.460847	-3.00728	0.00263593	0.00794799	Hypothetical proteins	- none -	- none -	hypothetical protein
fig|6666666.293769.peg.1191	35.5078	1.00703	0.336156	2.99574	0.00273783	0.00822883	Hypothetical proteins	- none -	- none -	hypothetical protein
fig|6666666.293769.peg.4077	63.7797	-1.35642	0.455092	-2.98055	0.00287733	0.00861365	Hypothetical proteins	- none -	- none -	hypothetical protein
fig|6666666.293769.peg.1008	18.7239	1.36346	0.458846	2.9715	0.00296347	0.00885036	Hypothetical proteins	- none -	- none -	hypothetical protein
fig|6666666.293769.peg.4114	144.414	-1.79523	0.604517	-2.9697	0.00298093	0.00889543	Hypothetical proteins	- none -	- none -	hypothetical protein
fig|6666666.293769.peg.3493	25.593	-1.73857	0.586194	-2.96587	0.00301831	0.00899983	Hypothetical proteins	- none -	- none -	hypothetical protein
fig|6666666.293769.peg.965	14.8371	2.17704	0.735448	2.96015	0.0030749	0.00915405	Hypothetical proteins	- none -	- none -	hypothetical protein
fig|6666666.293769.peg.1223	209.886	1.29721	0.438499	2.95831	0.00309333	0.0092016	Hypothetical proteins	- none -	- none -	hypothetical protein
fig|6666666.293769.peg.3330	194.339	-1.56747	0.529907	-2.95802	0.00309623	0.00920294	Hypothetical proteins	- none -	- none -	hypothetical protein
fig|6666666.293769.peg.418	144.08	1.13833	0.384865	2.95775	0.00309898	0.00920386	Hypothetical proteins	- none -	- none -	hypothetical protein
fig|6666666.293769.peg.2743	29.6851	-2.18674	0.739409	-2.95741	0.00310235	0.00920659	Hypothetical proteins	- none -	- none -	hypothetical protein
fig|6666666.293769.peg.3825	38.1554	-2.30339	0.780688	-2.95046	0.00317301	0.00940885	Hypothetical proteins	- none -	- none -	hypothetical protein
fig|6666666.293769.peg.3030	29.3782	1.10646	0.375641	2.94552	0.00322415	0.00953728	Hypothetical proteins	- none -	- none -	hypothetical protein
fig|6666666.293769.peg.1303	1006.22	-1.13385	0.384969	-2.94529	0.00322648	0.00953728	Hypothetical proteins	- none -	- none -	hypothetical protein
fig|6666666.293769.peg.4019	23.383	-2.23573	0.759398	-2.94409	0.00323907	0.00955945	Hypothetical proteins	- none -	- none -	hypothetical protein
fig|6666666.293769.peg.678	4.45821	-2.5303	0.859527	-2.94382	0.00324186	0.00956019	Hypothetical proteins	- none -	- none -	hypothetical protein
fig|6666666.293769.peg.3442	74.4727	-2.20621	0.751062	-2.93745	0.00330927	0.00972842	Hypothetical proteins	- none -	- none -	hypothetical protein
fig|6666666.293769.peg.3622	63.485	-1.38645	0.472215	-2.93606	0.00332412	0.00976444	Hypothetical proteins	- none -	- none -	hypothetical protein
fig|6666666.293769.peg.2415	599.922	0.846306	0.288518	2.93329	0.00335394	0.00982899	Hypothetical proteins	- none -	- none -	hypothetical protein
fig|6666666.293769.peg.1025	116.895	0.723568	0.246854	2.93115	0.00337708	0.00988139	Hypothetical proteins	- none -	- none -	hypothetical protein
fig|6666666.293769.peg.2465	103.973	1.55354	0.530123	2.93054	0.00338378	0.00989327	Hypothetical proteins	- none -	- none -	hypothetical protein
fig|6666666.293769.peg.610	144.158	2.16325	0.739378	2.92577	0.00343609	0.0100228	Hypothetical proteins	- none -	- none -	hypothetical protein
fig|6666666.293769.peg.3794	34.3824	1.20181	0.411836	2.91818	0.00352084	0.0102382	Hypothetical proteins	- none -	- none -	hypothetical protein
fig|6666666.293769.peg.2478	78.8794	1.08286	0.371267	2.91665	0.00353817	0.0102748	Hypothetical proteins	- none -	- none -	hypothetical protein
fig|6666666.293769.peg.1861	71.7847	-0.871778	0.298904	-2.91658	0.00353888	0.0102748	Hypothetical proteins	- none -	- none -	hypothetical protein
fig|6666666.293769.peg.647	223.655	0.734574	0.252113	2.91367	0.00357211	0.0103633	Hypothetical proteins	- none -	- none -	hypothetical protein
fig|6666666.293769.peg.1480	132.7	0.799517	0.27447	2.91295	0.00358034	0.0103791	Hypothetical proteins	- none -	- none -	hypothetical protein
fig|6666666.293769.peg.332	145.957	0.763298	0.262138	2.91181	0.0035934	0.0104089	Hypothetical proteins	- none -	- none -	hypothetical protein
fig|6666666.293769.peg.3597	6.54739	-3.14834	1.08275	-2.90772	0.00364079	0.0105138	Hypothetical proteins	- none -	- none -	hypothetical protein
fig|6666666.293769.peg.3112	60.1947	1.83072	0.630736	2.90252	0.00370176	0.0106734	Hypothetical proteins	- none -	- none -	hypothetical protein
fig|6666666.293769.peg.919	732.176	0.567993	0.195964	2.89846	0.00375004	0.0108044	Hypothetical proteins	- none -	- none -	hypothetical protein
fig|6666666.293769.peg.2447	20.6422	-1.84975	0.639025	-2.89464	0.00379589	0.010919	Hypothetical proteins	- none -	- none -	hypothetical protein
fig|6666666.293769.peg.2612	319.459	-0.781341	0.269973	-2.89414	0.00380198	0.0109205	Hypothetical proteins	- none -	- none -	hypothetical protein
fig|6666666.293769.peg.1192	60.5318	0.755186	0.261052	2.89285	0.00381761	0.0109487	Hypothetical proteins	- none -	- none -	hypothetical protein
fig|6666666.293769.peg.730	53.7982	0.895763	0.309899	2.8905	0.00384632	0.0110058	Hypothetical proteins	- none -	- none -	hypothetical protein
fig|6666666.293769.peg.4128	57.3135	-1.44623	0.501147	-2.88585	0.00390362	0.0111274	Hypothetical proteins	- none -	- none -	hypothetical protein
fig|6666666.293769.peg.952	81.0409	-1.94557	0.674438	-2.88473	0.00391746	0.0111584	Hypothetical proteins	- none -	- none -	hypothetical protein
fig|6666666.293769.peg.4214	39.3641	-1.6944	0.58752	-2.88399	0.00392675	0.0111764	Hypothetical proteins	- none -	- none -	hypothetical protein
fig|6666666.293769.peg.3853	8.62348	-2.74044	0.951001	-2.88163	0.00395619	0.0112516	Hypothetical proteins	- none -	- none -	hypothetical protein
fig|6666666.293769.peg.3197	4.64639	4.08872	1.42025	2.87887	0.00399099	0.0113249	Hypothetical proteins	- none -	- none -	hypothetical protein
fig|6666666.293769.peg.861	141.948	0.98716	0.342973	2.87824	0.00399895	0.0113389	Hypothetical proteins	- none -	- none -	hypothetical protein
fig|6666666.293769.peg.1507	6.84498	-2.57329	0.894784	-2.87587	0.00402913	0.0114073	Hypothetical proteins	- none -	- none -	hypothetical protein
fig|6666666.293769.peg.3849	8.65456	-1.59272	0.554184	-2.874	0.00405314	0.011458	Hypothetical proteins	- none -	- none -	hypothetical protein
fig|6666666.293769.peg.3076	9.7981	-2.26925	0.790951	-2.86902	0.00411752	0.0116225	Hypothetical proteins	- none -	- none -	hypothetical protein
fig|6666666.293769.peg.1029	81.7615	-0.878304	0.307137	-2.85965	0.00424105	0.0119371	Hypothetical proteins	- none -	- none -	hypothetical protein
fig|6666666.293769.peg.78	83.896	0.885581	0.309945	2.85722	0.0042737	0.0120182	Hypothetical proteins	- none -	- none -	hypothetical protein
fig|6666666.293769.peg.2076	44.6586	1.178	0.413102	2.8516	0.00435005	0.0122146	Hypothetical proteins	- none -	- none -	hypothetical protein
fig|6666666.293769.peg.520	206.93	0.780644	0.273952	2.84956	0.00437796	0.0122838	Hypothetical proteins	- none -	- none -	hypothetical protein
fig|6666666.293769.peg.3067	10.5628	-1.30865	0.459795	-2.84616	0.00442502	0.0124066	Hypothetical proteins	- none -	- none -	hypothetical protein
fig|6666666.293769.peg.3658	97.1822	-2.18879	0.769864	-2.84308	0.00446792	0.0125001	Hypothetical proteins	- none -	- none -	hypothetical protein
fig|6666666.293769.peg.155	737.193	0.348244	0.12249	2.84305	0.00446837	0.0125001	Hypothetical proteins	- none -	- none -	FIG00807778: hypothetical protein
fig|6666666.293769.peg.3475	11.1306	-1.99261	0.701144	-2.84193	0.00448407	0.0125347	Hypothetical proteins	- none -	- none -	hypothetical protein
fig|6666666.293769.peg.44	271.545	-1.71549	0.605608	-2.83268	0.00461596	0.0128365	Hypothetical proteins	- none -	- none -	FIG01063741: hypothetical protein
fig|6666666.293769.peg.614	25390.8	-1.06529	0.376222	-2.83154	0.00463239	0.0128727	Hypothetical proteins	- none -	- none -	hypothetical protein
fig|6666666.293769.peg.2394	126.951	0.800741	0.282982	2.82965	0.00465983	0.0129338	Hypothetical proteins	- none -	- none -	hypothetical protein
fig|6666666.293769.peg.3103	42.2105	1.03899	0.367191	2.82956	0.00466125	0.0129338	Hypothetical proteins	- none -	- none -	hypothetical protein
fig|6666666.293769.peg.1130	216.938	0.612831	0.216756	2.82728	0.00469455	0.013007	Hypothetical proteins	- none -	- none -	hypothetical protein
fig|6666666.293769.peg.1333	98.7868	-0.64386	0.22779	-2.82656	0.00470517	0.0130268	Hypothetical proteins	- none -	- none -	hypothetical protein
fig|6666666.293769.peg.1472	61.6041	1.08727	0.385356	2.82146	0.00478056	0.0131966	Hypothetical proteins	- none -	- none -	hypothetical protein
fig|6666666.293769.peg.3144	142.547	1.23124	0.436556	2.82036	0.00479701	0.0132323	Hypothetical proteins	- none -	- none -	hypothetical protein
fig|6666666.293769.peg.3372	38.158	-1.95282	0.693559	-2.81565	0.00486783	0.0134178	Hypothetical proteins	- none -	- none -	hypothetical protein
fig|6666666.293769.peg.923	79.1059	-1.54713	0.551377	-2.80594	0.00501695	0.0138086	Hypothetical proteins	- none -	- none -	hypothetical protein
fig|6666666.293769.peg.1048	26.6664	1.2316	0.438984	2.80556	0.00502294	0.0138149	Hypothetical proteins	- none -	- none -	hypothetical protein
fig|6666666.293769.peg.2313	7.98843	-2.73869	0.977499	-2.80173	0.00508289	0.0139492	Hypothetical proteins	- none -	- none -	hypothetical protein
fig|6666666.293769.peg.2116	28.4156	2.68432	0.958604	2.80024	0.00510645	0.0140036	Hypothetical proteins	- none -	- none -	hypothetical protein
fig|6666666.293769.peg.2982	9.86222	-1.48818	0.531652	-2.79915	0.00512367	0.0140261	Hypothetical proteins	- none -	- none -	hypothetical protein
fig|6666666.293769.peg.3647	9.63184	-2.42787	0.867715	-2.798	0.00514195	0.0140599	Hypothetical proteins	- none -	- none -	hypothetical protein
fig|6666666.293769.peg.3939	38.4158	1.21574	0.434621	2.79725	0.00515401	0.0140724	Hypothetical proteins	- none -	- none -	hypothetical protein
fig|6666666.293769.peg.1966	303.93	-0.816218	0.291824	-2.79695	0.00515874	0.0140751	Hypothetical proteins	- none -	- none -	hypothetical protein
fig|6666666.293769.peg.1000	104.235	0.581627	0.208127	2.79458	0.0051967	0.0141684	Hypothetical proteins	- none -	- none -	hypothetical protein
fig|6666666.293769.peg.3604	11.2726	-1.54032	0.552117	-2.78985	0.00527326	0.0143178	Hypothetical proteins	- none -	- none -	hypothetical protein
fig|6666666.293769.peg.3426	375.125	0.925354	0.33222	2.78536	0.00534677	0.0144934	Hypothetical proteins	- none -	- none -	hypothetical protein
fig|6666666.293769.peg.2003	16.5632	1.36485	0.490687	2.78152	0.00541055	0.0146451	Hypothetical proteins	- none -	- none -	hypothetical protein
fig|6666666.293769.peg.3665	106.127	-1.36246	0.490078	-2.78009	0.00543441	0.0146885	Hypothetical proteins	- none -	- none -	hypothetical protein
fig|6666666.293769.peg.1709	19.4261	1.56378	0.56288	2.77817	0.00546655	0.0147542	Hypothetical proteins	- none -	- none -	hypothetical protein
fig|6666666.293769.peg.3823	69.6992	-1.60382	0.57746	-2.77737	0.00548008	0.0147801	Hypothetical proteins	- none -	- none -	hypothetical protein
fig|6666666.293769.peg.2361	3704.31	-1.19178	0.429388	-2.77553	0.00551125	0.0148535	Hypothetical proteins	- none -	- none -	hypothetical protein
fig|6666666.293769.peg.1880	9.88304	2.06814	0.745898	2.77268	0.00555967	0.0149732	Hypothetical proteins	- none -	- none -	hypothetical protein
fig|6666666.293769.peg.521	148.616	0.954153	0.344486	2.76979	0.00560923	0.0150851	Hypothetical proteins	- none -	- none -	hypothetical protein
fig|6666666.293769.peg.2481	21.2086	1.35709	0.49055	2.76647	0.00566667	0.0152178	Hypothetical proteins	- none -	- none -	hypothetical protein
fig|6666666.293769.peg.3994	17.8843	-2.02843	0.733404	-2.76577	0.00567881	0.0152395	Hypothetical proteins	- none -	- none -	hypothetical protein
fig|6666666.293769.peg.312	91.7478	-1.08712	0.393234	-2.76456	0.00569994	0.0152853	Hypothetical proteins	- none -	- none -	hypothetical protein
fig|6666666.293769.peg.1027	136.716	-0.802107	0.290291	-2.76311	0.00572537	0.0153207	Hypothetical proteins	- none -	- none -	hypothetical protein
fig|6666666.293769.peg.3496	6.85412	-1.88453	0.682328	-2.76191	0.00574641	0.0153551	Hypothetical proteins	- none -	- none -	hypothetical protein
fig|6666666.293769.peg.2288	247.21	-0.907771	0.328776	-2.76106	0.00576134	0.015384	Hypothetical proteins	- none -	- none -	hypothetical protein
fig|6666666.293769.peg.796	6032.64	-1.53901	0.557913	-2.75852	0.00580638	0.0154933	Hypothetical proteins	- none -	- none -	hypothetical protein
fig|6666666.293769.peg.2812	31.0222	1.16087	0.421405	2.75476	0.00587344	0.0156403	Hypothetical proteins	- none -	- none -	hypothetical protein
fig|6666666.293769.peg.2758	11.1497	-2.62701	0.953858	-2.75409	0.00588564	0.0156603	Hypothetical proteins	- none -	- none -	hypothetical protein
fig|6666666.293769.peg.681	9.76864	-2.11014	0.768344	-2.74634	0.00602641	0.0159896	Hypothetical proteins	- none -	- none -	hypothetical protein
fig|6666666.293769.peg.3480	16.4332	1.91807	0.699585	2.74173	0.00611171	0.0161702	Hypothetical proteins	- none -	- none -	hypothetical protein
fig|6666666.293769.peg.1094	43.8625	0.996699	0.364204	2.73665	0.00620684	0.0163695	Hypothetical proteins	- none -	- none -	Hypothetical YciO protein, TsaC/YrdC paralog
fig|6666666.293769.peg.3560	17.8106	-2.0765	0.758804	-2.73654	0.00620881	0.0163695	Hypothetical proteins	- none -	- none -	hypothetical protein
fig|6666666.293769.peg.4198	8.4943	-1.9572	0.715719	-2.7346	0.00624568	0.0164551	Hypothetical proteins	- none -	- none -	hypothetical protein
fig|6666666.293769.peg.3864	19.9684	-1.5098	0.552297	-2.73367	0.00626321	0.0164766	Hypothetical proteins	- none -	- none -	hypothetical protein
fig|6666666.293769.peg.166	35.231	1.06531	0.389727	2.73347	0.006267	0.0164766	Hypothetical proteins	- none -	- none -	hypothetical protein
fig|6666666.293769.peg.3733	7.67671	1.8059	0.662568	2.72561	0.00641834	0.016804	Hypothetical proteins	- none -	- none -	hypothetical protein
fig|6666666.293769.peg.1584	110.697	1.76829	0.649021	2.72456	0.00643881	0.0168458	Hypothetical proteins	- none -	- none -	hypothetical protein
fig|6666666.293769.peg.572	152.424	1.12678	0.414256	2.72	0.00652817	0.017044	Hypothetical proteins	- none -	- none -	hypothetical protein
fig|6666666.293769.peg.2605	31.5257	1.01666	0.373951	2.71869	0.00655402	0.0170996	Hypothetical proteins	- none -	- none -	hypothetical protein
fig|6666666.293769.peg.3495	115.723	-2.03613	0.749358	-2.71716	0.00658443	0.017167	Hypothetical proteins	- none -	- none -	hypothetical protein
fig|6666666.293769.peg.1486	1079.21	-0.386205	0.14215	-2.71688	0.00658998	0.0171696	Hypothetical proteins	- none -	- none -	hypothetical protein
fig|6666666.293769.peg.1800	223.693	-0.655513	0.241468	-2.71469	0.00663373	0.0172716	Hypothetical proteins	- none -	- none -	hypothetical protein
fig|6666666.293769.peg.1260	105.598	1.02242	0.37697	2.7122	0.00668392	0.0173902	Hypothetical proteins	- none -	- none -	hypothetical protein
fig|6666666.293769.peg.3292	24.534	-2.51691	0.928173	-2.71169	0.00669419	0.0174049	Hypothetical proteins	- none -	- none -	hypothetical protein
fig|6666666.293769.peg.3229	25.5098	-1.87871	0.692903	-2.71135	0.00670095	0.0174104	Hypothetical proteins	- none -	- none -	hypothetical protein
fig|6666666.293769.peg.2749	35.5516	1.62718	0.600245	2.71086	0.00671096	0.0174244	Hypothetical proteins	- none -	- none -	hypothetical protein
fig|6666666.293769.peg.734	58.9493	0.901403	0.332604	2.71014	0.00672557	0.0174502	Hypothetical proteins	- none -	- none -	hypothetical protein
fig|6666666.293769.peg.4026	17.9978	1.43079	0.528249	2.70856	0.00675768	0.0175215	Hypothetical proteins	- none -	- none -	hypothetical protein
fig|6666666.293769.peg.2386	7.55826	-1.56649	0.580905	-2.69663	0.00700441	0.0181112	Hypothetical proteins	- none -	- none -	hypothetical protein
fig|6666666.293769.peg.2977	115.315	-0.72887	0.270387	-2.69565	0.00702507	0.0181521	Hypothetical proteins	- none -	- none -	hypothetical protein
fig|6666666.293769.peg.1784	144.642	-1.80979	0.671529	-2.69503	0.00703815	0.0181555	Hypothetical proteins	- none -	- none -	hypothetical protein
fig|6666666.293769.peg.2443	41.3975	-1.60354	0.595332	-2.69352	0.00707014	0.0182087	Hypothetical proteins	- none -	- none -	hypothetical protein
fig|6666666.293769.peg.3179	85.1622	-1.36585	0.507269	-2.69255	0.00709072	0.0182465	Hypothetical proteins	- none -	- none -	hypothetical protein
fig|6666666.293769.peg.1189	21.0935	1.24115	0.4614	2.68997	0.00714594	0.018376	Hypothetical proteins	- none -	- none -	hypothetical protein
fig|6666666.293769.peg.2515	9.68844	2.18638	0.813439	2.68783	0.0071919	0.0184689	Hypothetical proteins	- none -	- none -	hypothetical protein
fig|6666666.293769.peg.2255	272.818	1.10033	0.409413	2.68757	0.00719737	0.0184703	Hypothetical proteins	- none -	- none -	FIG00449901: hypothetical protein
fig|6666666.293769.peg.2325	12.6172	-2.30065	0.856744	-2.68534	0.00724555	0.0185686	Hypothetical proteins	- none -	- none -	hypothetical protein
fig|6666666.293769.peg.3907	35.8995	-3.75595	1.40133	-2.68027	0.00735623	0.0188009	Hypothetical proteins	- none -	- none -	hypothetical protein
fig|6666666.293769.peg.222	95.4398	1.372	0.5122	2.67865	0.00739195	0.0188794	Hypothetical proteins	- none -	- none -	hypothetical protein
fig|6666666.293769.peg.3674	9.45329	-1.61737	0.605083	-2.67297	0.00751839	0.0191566	Hypothetical proteins	- none -	- none -	hypothetical protein
fig|6666666.293769.peg.253	10.3704	1.6234	0.608343	2.66856	0.00761775	0.019372	Hypothetical proteins	- none -	- none -	hypothetical protein
fig|6666666.293769.peg.3824	26.3077	-2.38081	0.895461	-2.65875	0.00784309	0.0198695	Hypothetical proteins	- none -	- none -	hypothetical protein
fig|6666666.293769.peg.1984	42.2971	1.29259	0.486838	2.65507	0.00792913	0.0200739	Hypothetical proteins	- none -	- none -	hypothetical protein
fig|6666666.293769.peg.3729	22.5253	-3.15197	1.18886	-2.65126	0.00801925	0.0202884	Hypothetical proteins	- none -	- none -	hypothetical protein
fig|6666666.293769.peg.2611	231.518	-0.539838	0.203679	-2.65044	0.00803871	0.020324	Hypothetical proteins	- none -	- none -	hypothetical protein
fig|6666666.293769.peg.227	347.309	0.591425	0.223233	2.64937	0.00806428	0.0203612	Hypothetical proteins	- none -	- none -	hypothetical protein
fig|6666666.293769.peg.1117	70.7964	0.748623	0.283138	2.64402	0.00819269	0.0206162	Hypothetical proteins	- none -	- none -	hypothetical protein
fig|6666666.293769.peg.4048	56.7576	-2.03437	0.770474	-2.64041	0.00828061	0.0208098	Hypothetical proteins	- none -	- none -	hypothetical protein
fig|6666666.293769.peg.1221	20.9339	1.93682	0.733531	2.6404	0.00828073	0.0208098	Hypothetical proteins	- none -	- none -	hypothetical protein
fig|6666666.293769.peg.3548	208.691	-1.49241	0.566368	-2.63506	0.00841228	0.0211263	Hypothetical proteins	- none -	- none -	hypothetical protein
fig|6666666.293769.peg.251	17.5436	2.10025	0.797438	2.63375	0.00844479	0.0211938	Hypothetical proteins	- none -	- none -	hypothetical protein
fig|6666666.293769.peg.3140	684.883	-0.567244	0.216244	-2.62316	0.00871174	0.0218346	Hypothetical proteins	- none -	- none -	hypothetical protein
fig|6666666.293769.peg.1667	154.631	-1.31235	0.500599	-2.62155	0.00875305	0.0219235	Hypothetical proteins	- none -	- none -	hypothetical protein
fig|6666666.293769.peg.940	54.6636	1.05396	0.402186	2.62058	0.00877815	0.0219571	Hypothetical proteins	- none -	- none -	hypothetical protein
fig|6666666.293769.peg.2567	333.725	-0.896993	0.342393	-2.61978	0.00879868	0.0219791	Hypothetical proteins	- none -	- none -	hypothetical protein
fig|6666666.293769.peg.1481	77.4947	0.923809	0.353877	2.61054	0.00904002	0.0224774	Hypothetical proteins	- none -	- none -	hypothetical protein
fig|6666666.293769.peg.3308	377.298	-1.51454	0.580268	-2.61007	0.00905226	0.0224789	Hypothetical proteins	- none -	- none -	hypothetical protein
fig|6666666.293769.peg.1261	191.797	0.750376	0.287494	2.61006	0.0090526	0.0224789	Hypothetical proteins	- none -	- none -	hypothetical protein
fig|6666666.293769.peg.2170	91.746	1.40648	0.539507	2.60698	0.00913448	0.0226374	Hypothetical proteins	- none -	- none -	hypothetical protein
fig|6666666.293769.peg.3992	13.4629	-2.78848	1.07104	-2.60352	0.00922717	0.0228369	Hypothetical proteins	- none -	- none -	hypothetical protein
fig|6666666.293769.peg.3723	16.6281	-1.62104	0.624616	-2.59526	0.00945201	0.0233319	Hypothetical proteins	- none -	- none -	hypothetical protein
fig|6666666.293769.peg.3074	44.4785	-1.42586	0.551411	-2.58584	0.00971431	0.0238867	Hypothetical proteins	- none -	- none -	hypothetical protein
fig|6666666.293769.peg.3574	3.6063	-2.60007	1.00551	-2.58581	0.00971491	0.0238867	Hypothetical proteins	- none -	- none -	hypothetical protein
fig|6666666.293769.peg.4185	6.93878	-1.68625	0.652579	-2.58398	0.00976676	0.0239672	Hypothetical proteins	- none -	- none -	hypothetical protein
fig|6666666.293769.peg.4156	44.5717	-1.81787	0.704052	-2.58202	0.00982243	0.0240723	Hypothetical proteins	- none -	- none -	hypothetical protein
fig|6666666.293769.peg.1654	73.7117	0.752822	0.291976	2.57837	0.00992665	0.0243119	Hypothetical proteins	- none -	- none -	hypothetical protein
fig|6666666.293769.peg.2759	11.1294	-2.25675	0.877339	-2.57227	0.0101034	0.0246804	Hypothetical proteins	- none -	- none -	hypothetical protein
fig|6666666.293769.peg.2992	105.477	1.6572	0.644406	2.57167	0.0101208	0.0247069	Hypothetical proteins	- none -	- none -	hypothetical protein
fig|6666666.293769.peg.2335	25.4556	1.28998	0.50271	2.56605	0.0102863	0.0250783	Hypothetical proteins	- none -	- none -	hypothetical protein
fig|6666666.293769.peg.3568	2468.95	-1.83703	0.716033	-2.56556	0.0103009	0.0250976	Hypothetical proteins	- none -	- none -	hypothetical protein
fig|6666666.293769.peg.3937	8.44317	-2.09291	0.81617	-2.5643	0.0103383	0.0251562	Hypothetical proteins	- none -	- none -	hypothetical protein
fig|6666666.293769.peg.3802	6.16555	-2.03171	0.792661	-2.56315	0.0103729	0.0252238	Hypothetical proteins	- none -	- none -	hypothetical protein
fig|6666666.293769.peg.3246	75.8364	-1.57552	0.616081	-2.55732	0.0105481	0.0256333	Hypothetical proteins	- none -	- none -	hypothetical protein
fig|6666666.293769.peg.3278	31.4958	-1.51585	0.593017	-2.55617	0.010583	0.0257017	Hypothetical proteins	- none -	- none -	hypothetical protein
fig|6666666.293769.peg.3291	4.0309	2.97759	1.16821	2.54885	0.010808	0.0261735	Hypothetical proteins	- none -	- none -	hypothetical protein
fig|6666666.293769.peg.3453	5.31378	-3.38441	1.32789	-2.54871	0.0108122	0.0261735	Hypothetical proteins	- none -	- none -	hypothetical protein
fig|6666666.293769.peg.1547	16.0944	1.99011	0.782242	2.54411	0.0109555	0.0264864	Hypothetical proteins	- none -	- none -	hypothetical protein
fig|6666666.293769.peg.3277	17.9552	-2.19672	0.865113	-2.53923	0.0111098	0.0268421	Hypothetical proteins	- none -	- none -	hypothetical protein
fig|6666666.293769.peg.1457	135.092	-0.659861	0.260682	-2.53129	0.0113645	0.0273695	Hypothetical proteins	- none -	- none -	hypothetical protein
fig|6666666.293769.peg.2866	19.8211	-1.65171	0.654367	-2.52413	0.0115986	0.0278975	Hypothetical proteins	- none -	- none -	hypothetical protein
fig|6666666.293769.peg.528	29.2062	1.14961	0.455647	2.52302	0.0116351	0.0279468	Hypothetical proteins	- none -	- none -	hypothetical protein
fig|6666666.293769.peg.1106	33.2628	0.870502	0.345049	2.52283	0.0116414	0.0279468	Hypothetical proteins	- none -	- none -	FIG01121356: hypothetical protein
fig|6666666.293769.peg.1537	579.414	-0.5614	0.222902	-2.5186	0.0117822	0.0281992	Hypothetical proteins	- none -	- none -	hypothetical protein
fig|6666666.293769.peg.1346	114.573	1.09808	0.436437	2.51602	0.011869	0.0283844	Hypothetical proteins	- none -	- none -	hypothetical protein
fig|6666666.293769.peg.2510	12.7369	1.45907	0.579988	2.51568	0.0118803	0.0283933	Hypothetical proteins	- none -	- none -	hypothetical protein
fig|6666666.293769.peg.937	12.513	-1.31467	0.522738	-2.51498	0.0119041	0.0284321	Hypothetical proteins	- none -	- none -	hypothetical protein
fig|6666666.293769.peg.4152	5.71907	-2.00859	0.798876	-2.51427	0.0119279	0.0284709	Hypothetical proteins	- none -	- none -	hypothetical protein
fig|6666666.293769.peg.2684	14.5505	-1.87285	0.745372	-2.51264	0.0119832	0.0285847	Hypothetical proteins	- none -	- none -	hypothetical protein
fig|6666666.293769.peg.3162	16.7871	-1.6232	0.648812	-2.5018	0.0123564	0.0294375	Hypothetical proteins	- none -	- none -	hypothetical protein
fig|6666666.293769.peg.3088	144.864	0.645559	0.258176	2.50046	0.0124032	0.0294929	Hypothetical proteins	- none -	- none -	hypothetical protein
fig|6666666.293769.peg.2678	3.28403	-3.55419	1.42221	-2.49906	0.0124523	0.0295909	Hypothetical proteins	- none -	- none -	hypothetical protein
fig|6666666.293769.peg.2734	99.6182	-0.583374	0.234573	-2.48696	0.0128838	0.0304431	Hypothetical proteins	- none -	- none -	hypothetical protein
fig|6666666.293769.peg.1139	59.9604	-0.819821	0.329761	-2.48611	0.0129149	0.0304812	Hypothetical proteins	- none -	- none -	hypothetical protein
fig|6666666.293769.peg.2406	14.1747	-1.98604	0.799522	-2.48403	0.0129903	0.030637	Hypothetical proteins	- none -	- none -	hypothetical protein
fig|6666666.293769.peg.2441	95.0399	-1.82853	0.736402	-2.48305	0.0130261	0.0307021	Hypothetical proteins	- none -	- none -	hypothetical protein
fig|6666666.293769.peg.810	44.5573	0.599946	0.241816	2.481	0.0131014	0.0308409	Hypothetical proteins	- none -	- none -	hypothetical protein
fig|6666666.293769.peg.3248	27.4513	-1.87334	0.755587	-2.47932	0.0131634	0.0309366	Hypothetical proteins	- none -	- none -	hypothetical protein
fig|6666666.293769.peg.953	183.552	-1.49314	0.602254	-2.47926	0.0131657	0.0309366	Hypothetical proteins	- none -	- none -	hypothetical protein
fig|6666666.293769.peg.2165	120.794	0.639892	0.258891	2.47167	0.0134485	0.0315197	Hypothetical proteins	- none -	- none -	hypothetical protein
fig|6666666.293769.peg.798	136.259	1.13428	0.459473	2.46866	0.0135619	0.0317557	Hypothetical proteins	- none -	- none -	hypothetical protein
fig|6666666.293769.peg.4172	76.0015	-0.8581	0.34767	-2.46815	0.0135814	0.0317718	Hypothetical proteins	- none -	- none -	hypothetical protein
fig|6666666.293769.peg.3614	2.757	-5.0591	2.05209	-2.46535	0.0136881	0.0319814	Hypothetical proteins	- none -	- none -	hypothetical protein
fig|6666666.293769.peg.2427	124.007	0.531752	0.215717	2.46505	0.0136995	0.0319882	Hypothetical proteins	- none -	- none -	hypothetical protein
fig|6666666.293769.peg.1848	7.56006	1.89849	0.771098	2.46205	0.0138144	0.0322163	Hypothetical proteins	- none -	- none -	hypothetical protein
fig|6666666.293769.peg.3326	5.76181	-2.78493	1.13315	-2.4577	0.0139831	0.0325494	Hypothetical proteins	- none -	- none -	hypothetical protein
fig|6666666.293769.peg.4001	48.3056	-1.85337	0.755389	-2.45354	0.0141459	0.0329078	Hypothetical proteins	- none -	- none -	hypothetical protein
fig|6666666.293769.peg.3406	37.262	1.06717	0.435918	2.4481	0.0143613	0.0333676	Hypothetical proteins	- none -	- none -	hypothetical protein
fig|6666666.293769.peg.1275	499.512	0.713537	0.291946	2.44407	0.0145225	0.0336797	Hypothetical proteins	- none -	- none -	hypothetical protein
fig|6666666.293769.peg.1573	3.44898	-2.18453	0.894124	-2.4432	0.0145576	0.0337402	Hypothetical proteins	- none -	- none -	FIG01201914: hypothetical protein
fig|6666666.293769.peg.2319	6.92817	3.02724	1.2395	2.4423	0.0145939	0.0338034	Hypothetical proteins	- none -	- none -	hypothetical protein
fig|6666666.293769.peg.302	6452.83	-0.938889	0.384633	-2.441	0.0146467	0.0338841	Hypothetical proteins	- none -	- none -	hypothetical protein
fig|6666666.293769.peg.4181	10.3452	-3.30532	1.35513	-2.43912	0.014723	0.0340187	Hypothetical proteins	- none -	- none -	hypothetical protein
fig|6666666.293769.peg.2613	20.914	1.27838	0.524264	2.43843	0.0147511	0.0340627	Hypothetical proteins	- none -	- none -	hypothetical protein
fig|6666666.293769.peg.3879	32.0694	-1.88474	0.774111	-2.43472	0.0149035	0.0343722	Hypothetical proteins	- none -	- none -	hypothetical protein
fig|6666666.293769.peg.884	6.2663	1.65074	0.678142	2.43421	0.0149242	0.0343988	Hypothetical proteins	- none -	- none -	hypothetical protein
fig|6666666.293769.peg.530	4.95355	3.0866	1.27028	2.42986	0.0151049	0.0347513	Hypothetical proteins	- none -	- none -	hypothetical protein
fig|6666666.293769.peg.4017	18.0124	-1.7999	0.740937	-2.42922	0.0151313	0.0347748	Hypothetical proteins	- none -	- none -	hypothetical protein
fig|6666666.293769.peg.1342	40.5594	0.83704	0.345331	2.42388	0.0153559	0.0351795	Hypothetical proteins	- none -	- none -	hypothetical protein
fig|6666666.293769.peg.727	139.83	0.523075	0.215802	2.42386	0.0153565	0.0351795	Hypothetical proteins	- none -	- none -	hypothetical protein
fig|6666666.293769.peg.954	67.249	-1.53294	0.633778	-2.41874	0.0155745	0.0355921	Hypothetical proteins	- none -	- none -	hypothetical protein
fig|6666666.293769.peg.1929	35.1	1.07846	0.445953	2.41833	0.0155917	0.0356098	Hypothetical proteins	- none -	- none -	hypothetical protein
fig|6666666.293769.peg.3504	222.212	-0.710198	0.294133	-2.41455	0.0157549	0.0358734	Hypothetical proteins	- none -	- none -	hypothetical protein
fig|6666666.293769.peg.3485	2.9881	2.90077	1.20389	2.4095	0.0159745	0.0362854	Hypothetical proteins	- none -	- none -	hypothetical protein
fig|6666666.293769.peg.2798	116.424	1.0962	0.455422	2.407	0.0160844	0.0364909	Hypothetical proteins	- none -	- none -	hypothetical protein
fig|6666666.293769.peg.2528	23.9186	-0.927789	0.3855	-2.40672	0.0160965	0.0364965	Hypothetical proteins	- none -	- none -	hypothetical protein
fig|6666666.293769.peg.2413	32.3003	1.03541	0.430523	2.405	0.0161725	0.0366025	Hypothetical proteins	- none -	- none -	hypothetical protein
fig|6666666.293769.peg.3763	79.7075	-2.2728	0.945468	-2.40389	0.0162218	0.036692	Hypothetical proteins	- none -	- none -	hypothetical protein
fig|6666666.293769.peg.1219	13.8331	1.13773	0.474196	2.39928	0.0164272	0.0370451	Hypothetical proteins	- none -	- none -	hypothetical protein
fig|6666666.293769.peg.3002	45.1697	1.76441	0.735863	2.39774	0.0164966	0.0371347	Hypothetical proteins	- none -	- none -	hypothetical protein
fig|6666666.293769.peg.2494	42.4146	-1.36363	0.569957	-2.39251	0.0167337	0.0376233	Hypothetical proteins	- none -	- none -	hypothetical protein
fig|6666666.293769.peg.4163	22.6757	-2.56499	1.07235	-2.39193	0.01676	0.0376598	Hypothetical proteins	- none -	- none -	hypothetical protein
fig|6666666.293769.peg.2660	71.1187	-0.882957	0.369431	-2.39005	0.0168463	0.0378312	Hypothetical proteins	- none -	- none -	hypothetical protein
fig|6666666.293769.peg.140	133.664	-0.885025	0.370577	-2.38823	0.0169295	0.0379861	Hypothetical proteins	- none -	- none -	hypothetical protein
fig|6666666.293769.peg.2754	12.8346	1.7865	0.748084	2.3881	0.0169355	0.0379861	Hypothetical proteins	- none -	- none -	hypothetical protein
fig|6666666.293769.peg.1955	34.0949	0.868805	0.36473	2.38205	0.0172164	0.0385471	Hypothetical proteins	- none -	- none -	hypothetical protein
fig|6666666.293769.peg.4143	64.7465	-1.22649	0.515217	-2.38054	0.0172874	0.0386831	Hypothetical proteins	- none -	- none -	hypothetical protein
fig|6666666.293769.peg.3538	2.41743	-2.50241	1.05217	-2.37834	0.0173907	0.038891	Hypothetical proteins	- none -	- none -	hypothetical protein
fig|6666666.293769.peg.3126	75.0181	-1.50751	0.635053	-2.37383	0.0176047	0.0393228	Hypothetical proteins	- none -	- none -	hypothetical protein
fig|6666666.293769.peg.2421	65.9047	1.00648	0.424266	2.37229	0.017678	0.0394182	Hypothetical proteins	- none -	- none -	hypothetical protein
fig|6666666.293769.peg.85	150.514	0.528822	0.222965	2.37178	0.0177028	0.0394182	Hypothetical proteins	- none -	- none -	hypothetical protein
fig|6666666.293769.peg.1711	266.102	-0.907313	0.382553	-2.37173	0.0177049	0.0394182	Hypothetical proteins	- none -	- none -	hypothetical protein
fig|6666666.293769.peg.2933	45.6393	-1.06183	0.447788	-2.37129	0.0177261	0.0394298	Hypothetical proteins	- none -	- none -	hypothetical protein
fig|6666666.293769.peg.1214	158.307	0.659912	0.278534	2.36923	0.0178252	0.0396267	Hypothetical proteins	- none -	- none -	hypothetical protein
fig|6666666.293769.peg.2125	10.5186	-2.03386	0.85996	-2.36506	0.0180271	0.0399809	Hypothetical proteins	- none -	- none -	hypothetical protein
fig|6666666.293769.peg.512	25.2795	1.20282	0.508779	2.36412	0.0180727	0.0400586	Hypothetical proteins	- none -	- none -	hypothetical protein
fig|6666666.293769.peg.2153	87.5438	1.00862	0.426889	2.36271	0.0181418	0.0401642	Hypothetical proteins	- none -	- none -	hypothetical protein
fig|6666666.293769.peg.1747	443.786	-1.0071	0.426676	-2.36034	0.0182584	0.0403749	Hypothetical proteins	- none -	- none -	hypothetical protein
fig|6666666.293769.peg.3280	251.003	-0.608066	0.257735	-2.35927	0.0183109	0.0404433	Hypothetical proteins	- none -	- none -	hypothetical protein
fig|6666666.293769.peg.1105	59.6224	-0.920661	0.390716	-2.35634	0.0184558	0.0406677	Hypothetical proteins	- none -	- none -	hypothetical protein
fig|6666666.293769.peg.494	250.708	0.703032	0.298454	2.35558	0.0184939	0.0407279	Hypothetical proteins	- none -	- none -	hypothetical protein
fig|6666666.293769.peg.2742	11.5462	-2.00756	0.853723	-2.35154	0.018696	0.0411005	Hypothetical proteins	- none -	- none -	hypothetical protein
fig|6666666.293769.peg.2047	60.0346	1.32156	0.562669	2.34873	0.0188375	0.0413632	Hypothetical proteins	- none -	- none -	hypothetical protein
fig|6666666.293769.peg.3765	12.6286	-1.3323	0.568637	-2.34297	0.0191308	0.0419582	Hypothetical proteins	- none -	- none -	hypothetical protein
fig|6666666.293769.peg.2252	7.33637	-1.10074	0.470629	-2.33888	0.0193418	0.0423716	Hypothetical proteins	- none -	- none -	hypothetical protein
fig|6666666.293769.peg.2431	3.79343	-2.15238	0.921079	-2.3368	0.0194496	0.0425749	Hypothetical proteins	- none -	- none -	hypothetical protein
fig|6666666.293769.peg.677	2.29669	-3.8356	1.64161	-2.33649	0.0194659	0.0425749	Hypothetical proteins	- none -	- none -	hypothetical protein
fig|6666666.293769.peg.3449	5.85579	2.04151	0.873772	2.33643	0.0194686	0.0425749	Hypothetical proteins	- none -	- none -	hypothetical protein
fig|6666666.293769.peg.3251	5.56839	-2.1556	0.923405	-2.33441	0.0195745	0.0427815	Hypothetical proteins	- none -	- none -	hypothetical protein
fig|6666666.293769.peg.2816	9.27404	2.5506	1.0929	2.33379	0.0196065	0.0428016	Hypothetical proteins	- none -	- none -	hypothetical protein
fig|6666666.293769.peg.2284	12.0785	1.11265	0.477175	2.33175	0.019714	0.0430113	Hypothetical proteins	- none -	- none -	hypothetical protein
fig|6666666.293769.peg.4037	7.145	-2.46481	1.06062	-2.32392	0.0201297	0.0438418	Hypothetical proteins	- none -	- none -	hypothetical protein
fig|6666666.293769.peg.167	193.64	0.603638	0.25984	2.32311	0.0201732	0.0439112	Hypothetical proteins	- none -	- none -	hypothetical protein
fig|6666666.293769.peg.324	30.596	0.986844	0.425	2.32199	0.0202337	0.0439919	Hypothetical proteins	- none -	- none -	hypothetical protein
fig|6666666.293769.peg.2374	65.1582	-0.850702	0.366482	-2.32126	0.0202727	0.0440512	Hypothetical proteins	- none -	- none -	hypothetical protein
fig|6666666.293769.peg.221	135.164	0.636344	0.274339	2.31956	0.0203649	0.044226	Hypothetical proteins	- none -	- none -	hypothetical protein
fig|6666666.293769.peg.2702	6.44269	1.5999	0.689826	2.31928	0.0203798	0.0442328	Hypothetical proteins	- none -	- none -	hypothetical protein
fig|6666666.293769.peg.4084	7.19813	-1.87367	0.808115	-2.31857	0.0204184	0.0442909	Hypothetical proteins	- none -	- none -	hypothetical protein
fig|6666666.293769.peg.1946	355.536	-0.546429	0.235763	-2.31771	0.0204652	0.0443488	Hypothetical proteins	- none -	- none -	hypothetical protein
fig|6666666.293769.peg.2955	238.212	-0.606197	0.261624	-2.31705	0.020501	0.0443932	Hypothetical proteins	- none -	- none -	hypothetical protein
fig|6666666.293769.peg.3332	40.7171	-0.921813	0.39866	-2.31228	0.0207624	0.0448817	Hypothetical proteins	- none -	- none -	hypothetical protein
fig|6666666.293769.peg.1789	11.1509	2.19178	0.948038	2.31192	0.0207822	0.0448986	Hypothetical proteins	- none -	- none -	hypothetical protein
fig|6666666.293769.peg.2772	5.99256	-2.24249	0.970547	-2.31054	0.0208583	0.0450372	Hypothetical proteins	- none -	- none -	hypothetical protein
fig|6666666.293769.peg.1039	4.0219	2.18599	0.946934	2.3085	0.0209716	0.0452523	Hypothetical proteins	- none -	- none -	hypothetical protein
fig|6666666.293769.peg.3336	9.06701	1.70655	0.739307	2.30831	0.0209821	0.0452523	Hypothetical proteins	- none -	- none -	hypothetical protein
fig|6666666.293769.peg.3878	7.12717	-2.23272	0.967431	-2.30788	0.0210057	0.0452628	Hypothetical proteins	- none -	- none -	hypothetical protein
fig|6666666.293769.peg.3525	12.0838	1.54863	0.671047	2.30779	0.021011	0.0452628	Hypothetical proteins	- none -	- none -	hypothetical protein
fig|6666666.293769.peg.3416	281.923	-0.848637	0.368494	-2.30299	0.0212796	0.0457889	Hypothetical proteins	- none -	- none -	hypothetical protein
fig|6666666.293769.peg.3253	11.9269	-2.51571	1.09269	-2.3023	0.021318	0.0458453	Hypothetical proteins	- none -	- none -	hypothetical protein
fig|6666666.293769.peg.3721	4.73229	-2.16582	0.943034	-2.29665	0.0216386	0.0464815	Hypothetical proteins	- none -	- none -	hypothetical protein
fig|6666666.293769.peg.2035	110.007	1.15219	0.502334	2.29368	0.0218089	0.0467874	Hypothetical proteins	- none -	- none -	hypothetical protein
fig|6666666.293769.peg.1150	33.9498	1.53069	0.66761	2.29279	0.0218602	0.0468237	Hypothetical proteins	- none -	- none -	hypothetical protein
fig|6666666.293769.peg.3566	7.56093	-2.17905	0.95052	-2.29249	0.0218776	0.0468344	Hypothetical proteins	- none -	- none -	hypothetical protein
fig|6666666.293769.peg.3715	5.38785	-2.50106	1.09526	-2.28353	0.0223995	0.047788	Hypothetical proteins	- none -	- none -	hypothetical protein
fig|6666666.293769.peg.1574	2.46654	-2.51964	1.1044	-2.28146	0.0225212	0.0479932	Hypothetical proteins	- none -	- none -	FIG01201693: hypothetical protein
fig|6666666.293769.peg.1460	139.929	-1.61402	0.708588	-2.27779	0.0227389	0.0484024	Hypothetical proteins	- none -	- none -	hypothetical protein
fig|6666666.293769.peg.4029	3.66749	-2.71177	1.19285	-2.27335	0.0230051	0.0488858	Hypothetical proteins	- none -	- none -	hypothetical protein
fig|6666666.293769.peg.3893	117.528	0.788205	0.347286	2.26961	0.0232311	0.0492899	Hypothetical proteins	- none -	- none -	hypothetical protein
fig|6666666.293769.peg.173	68.3541	0.767738	0.338449	2.2684	0.0233048	0.0494109	Hypothetical proteins	- none -	- none -	hypothetical protein
fig|6666666.293769.peg.1129	121.127	0.9402	0.415634	2.26209	0.023692	0.0500624	Hypothetical proteins	- none -	- none -	hypothetical protein
fig|6666666.293769.peg.3143	18.503	-3.77887	1.67097	-2.26148	0.0237297	0.0501139	Hypothetical proteins	- none -	- none -	hypothetical protein
fig|6666666.293769.peg.3353	10.8018	-1.77884	0.786705	-2.26112	0.0237517	0.050132	Hypothetical proteins	- none -	- none -	hypothetical protein
fig|6666666.293769.peg.2552	99.9497	0.774359	0.343112	2.25687	0.0240164	0.0506044	Hypothetical proteins	- none -	- none -	FIG00640418: hypothetical protein
fig|6666666.293769.peg.2317	89.9677	0.642308	0.284655	2.25644	0.0240428	0.0506044	Hypothetical proteins	- none -	- none -	hypothetical protein
fig|6666666.293769.peg.2582	12.6021	-1.19861	0.53177	-2.254	0.0241965	0.0508424	Hypothetical proteins	- none -	- none -	hypothetical protein
fig|6666666.293769.peg.4058	5.77104	2.15882	0.958564	2.25214	0.0243133	0.0509561	Hypothetical proteins	- none -	- none -	hypothetical protein
fig|6666666.293769.peg.680	10.2389	-1.61582	0.718834	-2.24783	0.0245869	0.0514258	Hypothetical proteins	- none -	- none -	hypothetical protein
fig|6666666.293769.peg.2036	117.863	0.488419	0.217438	2.24625	0.0246882	0.0515585	Hypothetical proteins	- none -	- none -	hypothetical protein
fig|6666666.293769.peg.2704	31.2057	-1.3205	0.58795	-2.24594	0.0247076	0.0515702	Hypothetical proteins	- none -	- none -	hypothetical protein
fig|6666666.293769.peg.329	81.8164	0.650435	0.290565	2.23852	0.0251873	0.0525422	Hypothetical proteins	- none -	- none -	hypothetical protein
fig|6666666.293769.peg.3882	5.85969	-2.38965	1.06972	-2.23391	0.0254892	0.0530838	Hypothetical proteins	- none -	- none -	hypothetical protein
fig|6666666.293769.peg.2550	32.4367	0.7236	0.324138	2.23238	0.02559	0.0532345	Hypothetical proteins	- none -	- none -	hypothetical protein
fig|6666666.293769.peg.1158	14.7243	1.39687	0.627966	2.22444	0.0261191	0.0542152	Hypothetical proteins	- none -	- none -	hypothetical protein
fig|6666666.293769.peg.3490	15.6334	-1.79427	0.807169	-2.22292	0.0262211	0.0543369	Hypothetical proteins	- none -	- none -	hypothetical protein
fig|6666666.293769.peg.398	30.0256	1.41763	0.638295	2.22096	0.0263537	0.0544914	Hypothetical proteins	- none -	- none -	hypothetical protein
fig|6666666.293769.peg.977	139.117	0.796464	0.358762	2.22003	0.0264165	0.0545913	Hypothetical proteins	- none -	- none -	hypothetical protein
fig|6666666.293769.peg.2814	580.657	-0.643037	0.289908	-2.21807	0.0265499	0.0548134	Hypothetical proteins	- none -	- none -	hypothetical protein
fig|6666666.293769.peg.3818	18.2497	-1.6538	0.745617	-2.21802	0.0265532	0.0548134	Hypothetical proteins	- none -	- none -	hypothetical protein
fig|6666666.293769.peg.2876	2.75939	2.26501	1.02189	2.21649	0.026658	0.0549996	Hypothetical proteins	- none -	- none -	hypothetical protein
fig|6666666.293769.peg.1437	44.9797	0.768303	0.346717	2.21594	0.0266956	0.0550469	Hypothetical proteins	- none -	- none -	hypothetical protein
fig|6666666.293769.peg.3033	55.6684	0.470915	0.212663	2.21438	0.0268029	0.0552379	Hypothetical proteins	- none -	- none -	hypothetical protein
fig|6666666.293769.peg.3101	18.4924	0.868509	0.39292	2.2104	0.0270776	0.0557734	Hypothetical proteins	- none -	- none -	hypothetical protein
fig|6666666.293769.peg.2917	169.017	0.793085	0.359161	2.20816	0.027233	0.0560321	Hypothetical proteins	- none -	- none -	hypothetical protein
fig|6666666.293769.peg.1426	105.042	-1.33237	0.603521	-2.20766	0.0272677	0.0560728	Hypothetical proteins	- none -	- none -	hypothetical protein
fig|6666666.293769.peg.2575	327.994	-0.884345	0.403462	-2.19189	0.0283875	0.0580576	Hypothetical proteins	- none -	- none -	hypothetical protein
fig|6666666.293769.peg.1692	493.697	0.840315	0.383725	2.18989	0.0285323	0.058322	Hypothetical proteins	- none -	- none -	hypothetical protein
fig|6666666.293769.peg.1109	12.967	1.11873	0.512161	2.18434	0.0289376	0.05899	Hypothetical proteins	- none -	- none -	hypothetical protein
fig|6666666.293769.peg.3509	22.0265	-1.55885	0.718996	-2.1681	0.0301512	0.0611652	Hypothetical proteins	- none -	- none -	hypothetical protein
fig|6666666.293769.peg.3102	45.361	0.721916	0.333535	2.16444	0.0304307	0.0615993	Hypothetical proteins	- none -	- none -	hypothetical protein
fig|6666666.293769.peg.4175	35.1584	0.572828	0.264891	2.1625	0.0305796	0.061834	Hypothetical proteins	- none -	- none -	hypothetical protein
fig|6666666.293769.peg.1006	77.5808	0.532455	0.246678	2.1585	0.0308887	0.0623918	Hypothetical proteins	- none -	- none -	hypothetical protein
fig|6666666.293769.peg.3695	15.5051	-1.69285	0.784661	-2.15742	0.0309726	0.0624898	Hypothetical proteins	- none -	- none -	hypothetical protein
fig|6666666.293769.peg.288	4443.61	-0.917447	0.425288	-2.15724	0.0309871	0.0624898	Hypothetical proteins	- none -	- none -	hypothetical protein
fig|6666666.293769.peg.2868	74.393	-1.06205	0.493141	-2.15364	0.0312687	0.0629227	Hypothetical proteins	- none -	- none -	hypothetical protein
fig|6666666.293769.peg.2518	125.783	0.61037	0.283809	2.15064	0.0315047	0.0632959	Hypothetical proteins	- none -	- none -	hypothetical protein
fig|6666666.293769.peg.1670	68.392	-1.0388	0.48419	-2.14543	0.0319183	0.0640583	Hypothetical proteins	- none -	- none -	hypothetical protein
fig|6666666.293769.peg.3772	60.9357	0.841373	0.393175	2.13995	0.0323591	0.064839	Hypothetical proteins	- none -	- none -	hypothetical protein
fig|6666666.293769.peg.1136	163.062	0.565548	0.264763	2.13605	0.0326755	0.0653683	Hypothetical proteins	- none -	- none -	hypothetical protein
fig|6666666.293769.peg.4053	269.488	-0.893848	0.418619	-2.13523	0.032742	0.0654331	Hypothetical proteins	- none -	- none -	hypothetical protein
fig|6666666.293769.peg.1953	14.9918	1.19426	0.559312	2.13522	0.0327427	0.0654331	Hypothetical proteins	- none -	- none -	hypothetical protein
fig|6666666.293769.peg.2829	134.565	0.763811	0.357874	2.1343	0.0328183	0.0655493	Hypothetical proteins	- none -	- none -	hypothetical protein
fig|6666666.293769.peg.1775	11.0021	1.90794	0.894836	2.13217	0.0329932	0.0658287	Hypothetical proteins	- none -	- none -	FIG00779168: hypothetical protein
fig|6666666.293769.peg.495	11.9988	1.39338	0.654052	2.13038	0.0331402	0.0660869	Hypothetical proteins	- none -	- none -	hypothetical protein
fig|6666666.293769.peg.1964	221.708	0.844261	0.396413	2.12975	0.0331923	0.0661557	Hypothetical proteins	- none -	- none -	hypothetical protein
fig|6666666.293769.peg.1247	75.1744	0.828281	0.38945	2.1268	0.0334369	0.0665725	Hypothetical proteins	- none -	- none -	hypothetical protein
fig|6666666.293769.peg.1947	59.6444	0.833984	0.393756	2.11802	0.034173	0.0679662	Hypothetical proteins	- none -	- none -	hypothetical protein
fig|6666666.293769.peg.1259	21.717	1.23287	0.582753	2.1156	0.0343787	0.0683029	Hypothetical proteins	- none -	- none -	hypothetical protein
fig|6666666.293769.peg.2161	8.50661	-2.93899	1.38964	-2.11493	0.0344361	0.0683773	Hypothetical proteins	- none -	- none -	hypothetical protein
fig|6666666.293769.peg.2462	5.76387	-2.01539	0.953438	-2.11382	0.0345309	0.0684966	Hypothetical proteins	- none -	- none -	hypothetical protein
fig|6666666.293769.peg.2459	278.179	0.799287	0.379758	2.10473	0.0353149	0.0698674	Hypothetical proteins	- none -	- none -	hypothetical protein
fig|6666666.293769.peg.3855	37.1642	-1.61187	0.766411	-2.10314	0.0354536	0.0701048	Hypothetical proteins	- none -	- none -	hypothetical protein
fig|6666666.293769.peg.2590	14.9991	0.951911	0.45467	2.09363	0.0362927	0.0716509	Hypothetical proteins	- none -	- none -	hypothetical protein
fig|6666666.293769.peg.424	97.4115	0.658689	0.314937	2.09149	0.036484	0.0719907	Hypothetical proteins	- none -	- none -	hypothetical protein
fig|6666666.293769.peg.3017	40.2971	-1.23198	0.589686	-2.08921	0.0366888	0.0723397	Hypothetical proteins	- none -	- none -	hypothetical protein
fig|6666666.293769.peg.2505	818.787	0.729755	0.349317	2.08909	0.0366993	0.0723397	Hypothetical proteins	- none -	- none -	hypothetical protein
fig|6666666.293769.peg.3470	6.5569	1.65992	0.795381	2.08695	0.0368924	0.072682	Hypothetical proteins	- none -	- none -	hypothetical protein
fig|6666666.293769.peg.1918	48.6996	0.644943	0.309254	2.08548	0.0370259	0.0729068	Hypothetical proteins	- none -	- none -	hypothetical protein
fig|6666666.293769.peg.3077	443.579	-0.43996	0.211801	-2.07723	0.0377801	0.07412	Hypothetical proteins	- none -	- none -	hypothetical protein
fig|6666666.293769.peg.3221	6.28149	2.116	1.02035	2.0738	0.038098	0.0746657	Hypothetical proteins	- none -	- none -	hypothetical protein
fig|6666666.293769.peg.1975	17.6546	-2.33576	1.12942	-2.0681	0.0386307	0.0755915	Hypothetical proteins	- none -	- none -	hypothetical protein
fig|6666666.293769.peg.3714	15.6517	-1.69468	0.821686	-2.06244	0.0391658	0.0764394	Hypothetical proteins	- none -	- none -	hypothetical protein
fig|6666666.293769.peg.4091	912.011	-0.397963	0.193108	-2.06084	0.0393187	0.076698	Hypothetical proteins	- none -	- none -	hypothetical protein
fig|6666666.293769.peg.3501	35.9934	-1.3454	0.652994	-2.06036	0.0393644	0.0767473	Hypothetical proteins	- none -	- none -	hypothetical protein
fig|6666666.293769.peg.1658	80.4974	0.709192	0.344474	2.05877	0.0395164	0.0770037	Hypothetical proteins	- none -	- none -	hypothetical protein
fig|6666666.293769.peg.1666	194.014	-0.848797	0.412508	-2.05765	0.039624	0.0771035	Hypothetical proteins	- none -	- none -	hypothetical protein
fig|6666666.293769.peg.989	93.9849	0.99632	0.484216	2.05759	0.0396292	0.0771035	Hypothetical proteins	- none -	- none -	hypothetical protein
fig|6666666.293769.peg.4086	4.43648	-3.22424	1.56828	-2.0559	0.0397918	0.0773798	Hypothetical proteins	- none -	- none -	hypothetical protein
fig|6666666.293769.peg.2040	37.275	1.57811	0.768339	2.05393	0.0399827	0.0776678	Hypothetical proteins	- none -	- none -	hypothetical protein
fig|6666666.293769.peg.2634	3.97385	-4.2267	2.0593	-2.0525	0.0401212	0.077819	Hypothetical proteins	- none -	- none -	hypothetical protein
fig|6666666.293769.peg.4039	5.10255	-2.28725	1.11469	-2.05191	0.0401789	0.0778504	Hypothetical proteins	- none -	- none -	hypothetical protein
fig|6666666.293769.peg.1694	28.274	1.13799	0.554693	2.05157	0.0402113	0.0778732	Hypothetical proteins	- none -	- none -	hypothetical protein
fig|6666666.293769.peg.2739	5.78176	1.38105	0.675364	2.0449	0.040865	0.0789763	Hypothetical proteins	- none -	- none -	hypothetical protein
fig|6666666.293769.peg.1858	52.0022	0.903274	0.441845	2.04432	0.0409216	0.0790449	Hypothetical proteins	- none -	- none -	hypothetical protein
fig|6666666.293769.peg.1190	9.01788	1.59995	0.784118	2.04044	0.0413064	0.0796245	Hypothetical proteins	- none -	- none -	hypothetical protein
fig|6666666.293769.peg.1162	84.274	-0.589708	0.289137	-2.03955	0.0413953	0.0797453	Hypothetical proteins	- none -	- none -	hypothetical protein
fig|6666666.293769.peg.1415	16.6995	1.03395	0.506993	2.03939	0.0414115	0.0797453	Hypothetical proteins	- none -	- none -	hypothetical protein
fig|6666666.293769.peg.2304	67.7386	0.73352	0.359765	2.03889	0.0414614	0.0798005	Hypothetical proteins	- none -	- none -	hypothetical protein
fig|6666666.293769.peg.2976	1102.23	-1.55105	0.764651	-2.02844	0.0425154	0.0814196	Hypothetical proteins	- none -	- none -	hypothetical protein
fig|6666666.293769.peg.3699	1.9679	-4.10889	2.02568	-2.0284	0.0425194	0.0814196	Hypothetical proteins	- none -	- none -	hypothetical protein
fig|6666666.293769.peg.1314	8.75825	1.38854	0.684763	2.02777	0.042584	0.0815007	Hypothetical proteins	- none -	- none -	hypothetical protein
fig|6666666.293769.peg.1239	7.96647	-1.32663	0.654546	-2.02679	0.0426837	0.081568	Hypothetical proteins	- none -	- none -	hypothetical protein
fig|6666666.293769.peg.3327	16.9247	-1.24047	0.61218	-2.02631	0.0427327	0.0816201	Hypothetical proteins	- none -	- none -	hypothetical protein
fig|6666666.293769.peg.2359	5.88897	1.75227	0.8661	2.02318	0.0430551	0.0820561	Hypothetical proteins	- none -	- none -	hypothetical protein
fig|6666666.293769.peg.4197	7.79692	-1.51088	0.748874	-2.01754	0.0436395	0.0829242	Hypothetical proteins	- none -	- none -	hypothetical protein
fig|6666666.293769.peg.1253	92.2776	-0.778428	0.386105	-2.0161	0.0437891	0.0830888	Hypothetical proteins	- none -	- none -	hypothetical protein
fig|6666666.293769.peg.978	641.487	-0.548738	0.272319	-2.01505	0.043899	0.0832551	Hypothetical proteins	- none -	- none -	hypothetical protein
fig|6666666.293769.peg.3038	12.2457	1.4038	0.698602	2.00945	0.0444894	0.0841202	Hypothetical proteins	- none -	- none -	hypothetical protein
fig|6666666.293769.peg.781	79418.4	1.49078	0.742964	2.00653	0.0447998	0.0846218	Hypothetical proteins	- none -	- none -	hypothetical protein
fig|6666666.293769.peg.1741	85.7022	0.953957	0.477073	1.9996	0.0455433	0.0857675	Hypothetical proteins	- none -	- none -	hypothetical protein
fig|6666666.293769.peg.1268	122.715	-0.514685	0.258008	-1.99484	0.0460602	0.086524	Hypothetical proteins	- none -	- none -	hypothetical protein
fig|6666666.293769.peg.1329	1327.3	-0.646822	0.324366	-1.99411	0.0461402	0.0865583	Hypothetical proteins	- none -	- none -	hypothetical protein
fig|6666666.293769.peg.998	21.472	0.953098	0.477973	1.99404	0.0461475	0.0865583	Hypothetical proteins	- none -	- none -	hypothetical protein
fig|6666666.293769.peg.3216	9.53082	-1.63896	0.822907	-1.99167	0.0464069	0.086828	Hypothetical proteins	- none -	- none -	hypothetical protein
fig|6666666.293769.peg.3464	7.19813	-2.10029	1.05578	-1.98932	0.0466656	0.0871818	Hypothetical proteins	- none -	- none -	hypothetical protein
fig|6666666.293769.peg.1404	14.1714	1.3066	0.65838	1.98457	0.0471925	0.087904	Hypothetical proteins	- none -	- none -	hypothetical protein
fig|6666666.293769.peg.4078	514.667	0.379989	0.191646	1.98276	0.0473938	0.0882352	Hypothetical proteins	- none -	- none -	hypothetical protein
fig|6666666.293769.peg.1441	339.441	-0.572348	0.289281	-1.97852	0.0478703	0.08899	Hypothetical proteins	- none -	- none -	FIG00486859: hypothetical protein
fig|6666666.293769.peg.466	8.10168	2.20403	1.11667	1.97376	0.0484095	0.0898145	Hypothetical proteins	- none -	- none -	hypothetical protein
fig|6666666.293769.peg.154	420.269	0.376698	0.191042	1.9718	0.0486321	0.090142	Hypothetical proteins	- none -	- none -	hypothetical protein
fig|6666666.293769.peg.2610	72.4991	0.52881	0.268188	1.97179	0.048634	0.090142	Hypothetical proteins	- none -	- none -	hypothetical protein
fig|6666666.293769.peg.1030	46.6617	0.744127	0.37746	1.97141	0.0486771	0.0901775	Hypothetical proteins	- none -	- none -	hypothetical protein
fig|6666666.293769.peg.516	638.727	-0.327116	0.166196	-1.96826	0.0490385	0.0907575	Hypothetical proteins	- none -	- none -	hypothetical protein
fig|6666666.293769.peg.3188	134.848	-0.613281	0.311708	-1.96749	0.0491271	0.0908319	Hypothetical proteins	- none -	- none -	hypothetical protein
fig|6666666.293769.peg.3596	119.896	1.42604	0.727466	1.96028	0.0499628	0.0922409	Hypothetical proteins	- none -	- none -	hypothetical protein
fig|6666666.293769.peg.3606	8.26529	-2.24209	1.14412	-1.95967	0.0500348	0.0923033	Hypothetical proteins	- none -	- none -	hypothetical protein
fig|6666666.293769.peg.4028	12.913	0.994344	0.507521	1.95922	0.0500873	0.0923347	Hypothetical proteins	- none -	- none -	hypothetical protein
fig|6666666.293769.peg.3283	40.9886	0.576106	0.294225	1.95805	0.0502242	0.0924963	Hypothetical proteins	- none -	- none -	hypothetical protein
fig|6666666.293769.peg.3543	15.1216	-1.37011	0.699816	-1.95781	0.050252	0.0925021	Hypothetical proteins	- none -	- none -	hypothetical protein
fig|6666666.293769.peg.2480	11.9094	1.09506	0.55981	1.95613	0.0504503	0.0928216	Hypothetical proteins	- none -	- none -	hypothetical protein
fig|6666666.293769.peg.3247	25.1269	-1.63594	0.838164	-1.95181	0.0509604	0.0936684	Hypothetical proteins	- none -	- none -	hypothetical protein
fig|6666666.293769.peg.2639	19.0606	-3.30256	1.69312	-1.95058	0.0511069	0.0938917	Hypothetical proteins	- none -	- none -	hypothetical protein
fig|6666666.293769.peg.237	38.1369	1.43821	0.738318	1.94796	0.0514203	0.0943896	Hypothetical proteins	- none -	- none -	hypothetical protein
fig|6666666.293769.peg.1320	73.6325	0.485397	0.249638	1.9444	0.0518472	0.0948904	Hypothetical proteins	- none -	- none -	hypothetical protein
fig|6666666.293769.peg.1819	21.8512	1.1333	0.582921	1.94418	0.0518734	0.0948904	Hypothetical proteins	- none -	- none -	hypothetical protein
fig|6666666.293769.peg.771	24.3114	0.850019	0.438219	1.93971	0.0524146	0.095686	Hypothetical proteins	- none -	- none -	hypothetical protein
fig|6666666.293769.peg.2198	23.4484	1.0314	0.531855	1.93924	0.0524719	0.095744	Hypothetical proteins	- none -	- none -	hypothetical protein
fig|6666666.293769.peg.591	99.3979	-0.518872	0.267844	-1.93722	0.0527185	0.0961472	Hypothetical proteins	- none -	- none -	hypothetical protein
fig|6666666.293769.peg.604	72.7846	-0.505102	0.260789	-1.93682	0.0527668	0.0961887	Hypothetical proteins	- none -	- none -	hypothetical protein
fig|6666666.293769.peg.3861	52.5954	0.828142	0.42766	1.93645	0.0528128	0.0962258	Hypothetical proteins	- none -	- none -	hypothetical protein
fig|6666666.293769.peg.1188	28.574	-0.949006	0.490747	-1.9338	0.0531379	0.0966776	Hypothetical proteins	- none -	- none -	hypothetical protein
fig|6666666.293769.peg.2285	5.36094	1.9342	1.0017	1.93091	0.0534943	0.0972317	Hypothetical proteins	- none -	- none -	hypothetical protein
fig|6666666.293769.peg.2898	28.0529	1.63519	0.848955	1.92612	0.054089	0.0981903	Hypothetical proteins	- none -	- none -	hypothetical protein
fig|6666666.293769.peg.1473	141.351	-0.604947	0.31472	-1.92218	0.0545835	0.0988767	Hypothetical proteins	- none -	- none -	hypothetical protein
fig|6666666.293769.peg.2422	32.4049	0.916281	0.476838	1.92158	0.0546589	0.0989655	Hypothetical proteins	- none -	- none -	hypothetical protein
fig|6666666.293769.peg.622	51.7562	0.643687	0.335378	1.91928	0.0549483	0.0993459	Hypothetical proteins	- none -	- none -	hypothetical protein
fig|6666666.293769.peg.2516	3.43365	2.39674	1.24925	1.91854	0.0550429	0.0994565	Hypothetical proteins	- none -	- none -	hypothetical protein
fig|6666666.293769.peg.2341	13.1432	-1.50266	0.783975	-1.91672	0.055274	0.0997428	Hypothetical proteins	- none -	- none -	hypothetical protein
fig|6666666.293769.peg.1697	71.4574	-0.420289	0.219344	-1.91612	0.0553498	0.0998316	Hypothetical proteins	- none -	- none -	hypothetical protein
fig|6666666.293769.peg.3628	3.82262	-2.39331	1.25055	-1.9138	0.0556452	0.100247	Hypothetical proteins	- none -	- none -	hypothetical protein
fig|6666666.293769.peg.3605	11.3372	-1.64304	0.859772	-1.91102	0.0560019	0.100814	Hypothetical proteins	- none -	- none -	hypothetical protein
fig|6666666.293769.peg.2442	24.0297	-1.5408	0.806643	-1.91013	0.0561161	0.100875	Hypothetical proteins	- none -	- none -	hypothetical protein
fig|6666666.293769.peg.2618	369.228	0.454709	0.238096	1.90977	0.0561625	0.10091	Hypothetical proteins	- none -	- none -	hypothetical protein
fig|6666666.293769.peg.2326	68.9018	-0.545832	0.28614	-1.90757	0.0564473	0.101325	Hypothetical proteins	- none -	- none -	hypothetical protein
fig|6666666.293769.peg.1749	9413.54	0.434527	0.228398	1.90249	0.0571065	0.10241	Hypothetical proteins	- none -	- none -	hypothetical protein
fig|6666666.293769.peg.3433	85.4711	-0.771771	0.406287	-1.89957	0.0574895	0.103048	Hypothetical proteins	- none -	- none -	hypothetical protein
fig|6666666.293769.peg.2958	86.4103	0.793713	0.419994	1.88982	0.058782	0.105014	Hypothetical proteins	- none -	- none -	FIG00857679: hypothetical protein
fig|6666666.293769.peg.1144	36.2943	-1.08644	0.576163	-1.88565	0.0593422	0.105636	Hypothetical proteins	- none -	- none -	hypothetical protein
fig|6666666.293769.peg.2525	56.9408	0.578762	0.306945	1.88555	0.059355	0.105636	Hypothetical proteins	- none -	- none -	FIG00779168: hypothetical protein
fig|6666666.293769.peg.3791	29.0187	-0.99573	0.528226	-1.88504	0.059424	0.105708	Hypothetical proteins	- none -	- none -	hypothetical protein
fig|6666666.293769.peg.1419	197.907	0.497361	0.264075	1.88341	0.0596451	0.105951	Hypothetical proteins	- none -	- none -	hypothetical protein
fig|6666666.293769.peg.1340	1150.01	0.476533	0.253454	1.88015	0.0600872	0.106636	Hypothetical proteins	- none -	- none -	hypothetical protein
fig|6666666.293769.peg.2179	18.338	1.21299	0.646646	1.87583	0.0606792	0.107635	Hypothetical proteins	- none -	- none -	hypothetical protein
fig|6666666.293769.peg.3429	23.6779	0.880172	0.469596	1.87432	0.0608869	0.107953	Hypothetical proteins	- none -	- none -	hypothetical protein
fig|6666666.293769.peg.983	151.254	0.523338	0.279366	1.87331	0.0610263	0.108149	Hypothetical proteins	- none -	- none -	hypothetical protein
fig|6666666.293769.peg.1810	55.4002	0.646084	0.34552	1.86989	0.0614995	0.108936	Hypothetical proteins	- none -	- none -	hypothetical protein
fig|6666666.293769.peg.944	48.5977	0.507905	0.272006	1.86726	0.0618653	0.109481	Hypothetical proteins	- none -	- none -	hypothetical protein
fig|6666666.293769.peg.3743	3.6614	-1.9784	1.06249	-1.86205	0.0625965	0.110671	Hypothetical proteins	- none -	- none -	hypothetical protein
fig|6666666.293769.peg.2892	10.1297	-2.19236	1.18004	-1.85786	0.0631886	0.111612	Hypothetical proteins	- none -	- none -	hypothetical protein
fig|6666666.293769.peg.3681	74.2384	-1.27032	0.684188	-1.85668	0.0633572	0.111838	Hypothetical proteins	- none -	- none -	hypothetical protein
fig|6666666.293769.peg.2925	57.6746	0.543572	0.29282	1.85634	0.0634057	0.111838	Hypothetical proteins	- none -	- none -	hypothetical protein
fig|6666666.293769.peg.1099	131.18	-0.581344	0.313811	-1.85253	0.0639497	0.112376	Hypothetical proteins	- none -	- none -	hypothetical protein
fig|6666666.293769.peg.733	96.5942	0.626197	0.338685	1.84891	0.0644709	0.113186	Hypothetical proteins	- none -	- none -	hypothetical protein
fig|6666666.293769.peg.3595	58.5268	1.76361	0.956217	1.84437	0.0651298	0.114182	Hypothetical proteins	- none -	- none -	hypothetical protein
fig|6666666.293769.peg.2654	3.53232	-1.82817	0.991421	-1.84399	0.065185	0.114226	Hypothetical proteins	- none -	- none -	hypothetical protein
fig|6666666.293769.peg.1098	265.086	-0.65719	0.356798	-1.84191	0.0654887	0.114651	Hypothetical proteins	- none -	- none -	hypothetical protein
fig|6666666.293769.peg.1453	16367.5	-0.489092	0.265627	-1.84128	0.0655812	0.114746	Hypothetical proteins	- none -	- none -	hypothetical protein
fig|6666666.293769.peg.2588	14.7484	1.69106	0.921962	1.8342	0.066625	0.116315	Hypothetical proteins	- none -	- none -	hypothetical protein
fig|6666666.293769.peg.3104	24.6426	1.02281	0.559007	1.8297	0.0672952	0.117376	Hypothetical proteins	- none -	- none -	hypothetical protein
fig|6666666.293769.peg.1390	1958.62	0.326513	0.179007	1.82402	0.0681492	0.1187	Hypothetical proteins	- none -	- none -	hypothetical protein
fig|6666666.293769.peg.725	37.7469	-0.67689	0.371847	-1.82035	0.0687064	0.119504	Hypothetical proteins	- none -	- none -	hypothetical protein
fig|6666666.293769.peg.3953	2.24629	-3.27953	1.80166	-1.82028	0.0687162	0.119504	Hypothetical proteins	- none -	- none -	hypothetical protein
fig|6666666.293769.peg.2768	74.9647	0.602245	0.330878	1.82014	0.0687376	0.119504	Hypothetical proteins	- none -	- none -	hypothetical protein
fig|6666666.293769.peg.2822	50.656	-1.91506	1.05482	-1.81554	0.0694415	0.120422	Hypothetical proteins	- none -	- none -	hypothetical protein
fig|6666666.293769.peg.3311	30.4038	1.04909	0.579893	1.8091	0.0704352	0.121891	Hypothetical proteins	- none -	- none -	hypothetical protein
fig|6666666.293769.peg.747	11.5277	-1.33906	0.740647	-1.80795	0.0706136	0.122143	Hypothetical proteins	- none -	- none -	hypothetical protein
fig|6666666.293769.peg.2058	49.1911	0.719218	0.398467	1.80496	0.0710807	0.122782	Hypothetical proteins	- none -	- none -	hypothetical protein
fig|6666666.293769.peg.1565	3.32844	3.90708	2.16566	1.80411	0.0712145	0.122854	Hypothetical proteins	- none -	- none -	hypothetical protein
fig|6666666.293769.peg.4098	11.4266	-1.81105	1.00399	-1.80386	0.0712534	0.122854	Hypothetical proteins	- none -	- none -	hypothetical protein
fig|6666666.293769.peg.1772	139.552	-0.447557	0.248728	-1.79939	0.0719573	0.124011	Hypothetical proteins	- none -	- none -	hypothetical protein
fig|6666666.293769.peg.738	434.29	0.639221	0.355483	1.79818	0.072149	0.124227	Hypothetical proteins	- none -	- none -	hypothetical protein
fig|6666666.293769.peg.3856	24.9096	-1.55653	0.866727	-1.79587	0.0725149	0.1248	Hypothetical proteins	- none -	- none -	hypothetical protein
fig|6666666.293769.peg.2514	11.3404	0.810181	0.453241	1.78753	0.0738521	0.126811	Hypothetical proteins	- none -	- none -	hypothetical protein
fig|6666666.293769.peg.881	968.65	0.628966	0.353097	1.78129	0.0748658	0.128376	Hypothetical proteins	- none -	- none -	FIG01060185: hypothetical protein
fig|6666666.293769.peg.2493	22.4191	-1.18494	0.665619	-1.78021	0.075042	0.12856	Hypothetical proteins	- none -	- none -	hypothetical protein
fig|6666666.293769.peg.3925	3.85856	-2.13548	1.20108	-1.77797	0.0754084	0.129129	Hypothetical proteins	- none -	- none -	hypothetical protein
fig|6666666.293769.peg.1607	39.5814	0.552151	0.310889	1.77604	0.0757266	0.129615	Hypothetical proteins	- none -	- none -	hypothetical protein
fig|6666666.293769.peg.968	4.0586	-1.28536	0.726803	-1.76851	0.0769755	0.131573	Hypothetical proteins	- none -	- none -	hypothetical protein
fig|6666666.293769.peg.484	19.6335	0.842279	0.476689	1.76694	0.0772386	0.131962	Hypothetical proteins	- none -	- none -	hypothetical protein
fig|6666666.293769.peg.2351	4.85466	1.96151	1.11033	1.7666	0.0772951	0.131999	Hypothetical proteins	- none -	- none -	hypothetical protein
fig|6666666.293769.peg.3176	27.2064	1.69793	0.96316	1.76288	0.0779211	0.133007	Hypothetical proteins	- none -	- none -	conserved hypothetical protein
fig|6666666.293769.peg.2631	8.59113	-2.53959	1.44306	-1.75987	0.0784305	0.133695	Hypothetical proteins	- none -	- none -	hypothetical protein
fig|6666666.293769.peg.1561	107.702	0.710623	0.404191	1.75814	0.0787245	0.134135	Hypothetical proteins	- none -	- none -	hypothetical protein
fig|6666666.293769.peg.2557	46.7889	-1.23198	0.703233	-1.75187	0.0797953	0.135743	Hypothetical proteins	- none -	- none -	hypothetical protein
fig|6666666.293769.peg.1171	38.7161	0.737904	0.421232	1.75177	0.0798126	0.135743	Hypothetical proteins	- none -	- none -	hypothetical protein
fig|6666666.293769.peg.1839	9.07535	1.78482	1.02232	1.74586	0.080836	0.137235	Hypothetical proteins	- none -	- none -	hypothetical protein
fig|6666666.293769.peg.3323	6.6824	1.20503	0.690678	1.74471	0.0810356	0.13745	Hypothetical proteins	- none -	- none -	hypothetical protein
fig|6666666.293769.peg.1806	12.3686	0.868077	0.500446	1.73461	0.0828106	0.140018	Hypothetical proteins	- none -	- none -	FIG00970762: hypothetical protein
fig|6666666.293769.peg.2248	158.095	0.484738	0.279924	1.73168	0.0833304	0.14077	Hypothetical proteins	- none -	- none -	hypothetical protein
fig|6666666.293769.peg.3624	9.59427	-1.69787	0.982298	-1.72847	0.0839036	0.141675	Hypothetical proteins	- none -	- none -	hypothetical protein
fig|6666666.293769.peg.3572	6.51573	-1.814	1.04969	-1.72812	0.0839667	0.141717	Hypothetical proteins	- none -	- none -	hypothetical protein
fig|6666666.293769.peg.2357	6.45086	-1.06204	0.61561	-1.72519	0.084494	0.142543	Hypothetical proteins	- none -	- none -	hypothetical protein
fig|6666666.293769.peg.1401	32.4291	0.778101	0.451371	1.72386	0.0847332	0.142883	Hypothetical proteins	- none -	- none -	hypothetical protein
[truncated: 1,758 more rows]

## Sheet: A_kojimai_Hydrogen
FeatureID	baseMean	log2FoldChange	lfcSE	stat	pvalue	padj	Category	Subcategory	Subsystem	Function
fig|6666666.293769.peg.55	89.2595	-1.33453	0.462334	-2.88651	0.00389537	0.0378507	Amino Acids and Derivatives	- none -	A Glutathione-dependent Thiol Reductase Associated with a Step in Lysine Biosynthesis	FIG138056: a glutathione-dependent thiol reductase
fig|6666666.293769.peg.3645	14.9397	-1.97908	0.729846	-2.71165	0.00669501	0.0533063	Amino Acids and Derivatives	Branched-chain amino acids	Leucine Biosynthesis	2-isopropylmalate synthase (EC 2.3.3.13)
fig|6666666.293769.peg.1344	55.1893	-1.35478	0.516135	-2.62485	0.00866868	0.0639988	Amino Acids and Derivatives	- none -	- none -	pyridoxal phosphate-dependent deaminase, putative
fig|6666666.293769.peg.171	524.033	0.658686	0.286222	2.30131	0.0213742	0.113523	Amino Acids and Derivatives	Lysine, threonine, methionine, and cysteine	Threonine and Homoserine Biosynthesis	Homoserine dehydrogenase (EC 1.1.1.3)
fig|6666666.293769.peg.260	111.796	-1.00387	0.438585	-2.28889	0.0220859	0.114801	Amino Acids and Derivatives	Glutamine, glutamate, aspartate, asparagine; ammonia assimilation	Glutamine, Glutamate, Aspartate and Asparagine Biosynthesis	Glutamate racemase (EC 5.1.1.3)
fig|6666666.293769.peg.1812	29.0486	-1.48539	0.660537	-2.24876	0.0245278	0.12294	Amino Acids and Derivatives	Histidine Metabolism	Histidine Biosynthesis	Histidinol-phosphatase (EC 3.1.3.15)
fig|6666666.293769.peg.1969	343.306	-0.563479	0.25461	-2.2131	0.0268905	0.130006	Amino Acids and Derivatives	Histidine Metabolism	Histidine Biosynthesis	Histidinol-phosphate aminotransferase (EC 2.6.1.9)
fig|6666666.293769.peg.1180	190.465	-0.885836	0.401204	-2.20794	0.0272482	0.131219	Amino Acids and Derivatives	- none -	- none -	D-alanine--D-alanine ligase (EC 6.3.2.4)
fig|6666666.293769.peg.3081	163.495	0.653817	0.302453	2.16171	0.0306402	0.142164	Amino Acids and Derivatives	Arginine; urea cycle, polyamines	Arginine Biosynthesis -- gjo	Argininosuccinate synthase (EC 6.3.4.5)
fig|6666666.293769.peg.401	277.807	-0.783938	0.370418	-2.11636	0.0343141	0.151438	Amino Acids and Derivatives	Aromatic amino acids and derivatives	Phenylalanine and Tyrosine Branches from Chorismate	Prephenate dehydratase (EC 4.2.1.51)
fig|6666666.293769.peg.664	552.853	0.425687	0.206741	2.05904	0.0394909	0.164575	Amino Acids and Derivatives	Histidine Metabolism	Histidine Biosynthesis	Phosphoribosyl-ATP pyrophosphatase (EC 3.6.1.31)
fig|6666666.293769.peg.1019	249.09	0.588307	0.293151	2.00684	0.0447665	0.179004	Amino Acids and Derivatives	Lysine, threonine, methionine, and cysteine	Lysine Biosynthesis DAP Pathway	Aspartokinase (EC 2.7.2.4)
fig|6666666.293769.peg.2830	61.5874	-0.910655	0.456739	-1.99382	0.0461717	0.182116	Amino Acids and Derivatives	Glutamine, glutamate, aspartate, asparagine; ammonia assimilation	Glutamine, Glutamate, Aspartate and Asparagine Biosynthesis	Glutamate synthase [NADPH] large chain (EC 1.4.1.13)
fig|6666666.293769.peg.2099	326.343	0.380505	0.197113	1.93039	0.0535584	0.197705	Amino Acids and Derivatives	Amino Acids and Derivatives - no subcategory	Creatine and Creatinine Degradation	N-methylhydantoinase B (EC 3.5.2.14)
fig|6666666.293769.peg.578	250.887	0.621294	0.324121	1.91686	0.0552561	0.20232	Amino Acids and Derivatives	Lysine, threonine, methionine, and cysteine	Cysteine Biosynthesis	Serine acetyltransferase (EC 2.3.1.30)
fig|6666666.293769.peg.241	289.338	-0.352736	0.184318	-1.91373	0.0556547	0.202601	Amino Acids and Derivatives	Aromatic amino acids and derivatives	Common Pathway For Synthesis of Aromatic Compounds (DAHP synthase to chorismate)	Shikimate 5-dehydrogenase I alpha (EC 1.1.1.25)
fig|6666666.293769.peg.248	1611.79	0.588326	0.311031	1.89154	0.0585527	0.208213	Amino Acids and Derivatives	Glutamine, glutamate, aspartate, asparagine; ammonia assimilation	Glutamine synthetases	Glutamine synthetase type I (EC 6.3.1.2)
fig|6666666.293769.peg.1559	375.552	1.10071	0.591895	1.85964	0.0629359	0.216907	Amino Acids and Derivatives	Proline and 4-hydroxyproline	Proline Synthesis	Pyrroline-5-carboxylate reductase (EC 1.5.1.2)
fig|6666666.293769.peg.1294	200.838	0.713383	0.385075	1.85258	0.0639421	0.218721	Amino Acids and Derivatives	Alanine, serine, and glycine	Glycine cleavage system	Glycine cleavage system transcriptional antiactivator GcvR
fig|6666666.293769.peg.1723	158.251	0.478186	0.260367	1.83658	0.0662718	0.223372	Amino Acids and Derivatives	Proline and 4-hydroxyproline	Proline Synthesis	Glutamate 5-kinase (EC 2.7.2.11)
fig|6666666.293769.peg.2229	85.3917	0.558117	0.327233	1.70557	0.0880891	0.267977	Amino Acids and Derivatives	Branched-chain amino acids	Leucine Biosynthesis	2-isopropylmalate synthase (EC 2.3.3.13)
fig|6666666.293769.peg.2232	23.6166	-0.813133	0.480108	-1.69365	0.0903326	0.272328	Amino Acids and Derivatives	Alanine, serine, and glycine	Glycine and Serine Utilization	Phosphoserine phosphatase (EC 3.1.3.3)
fig|6666666.293769.peg.2879	205.666	-0.862907	0.520609	-1.65749	0.0974196	0.283935	Amino Acids and Derivatives	- none -	- none -	Oxygen-insensitive NAD(P)H nitroreductase (EC 1.-.-.-) / Dihydropteridine reductase (EC 1.5.1.34)
fig|6666666.293769.peg.3063	16.3436	1.4206	0.866173	1.64009	0.100987	0.289973	Amino Acids and Derivatives	Aromatic amino acids and derivatives	Tryptophan synthesis	Tryptophan synthase beta chain (EC 4.2.1.20)
fig|6666666.293769.peg.399	61.3053	-1.07207	0.660218	-1.62381	0.104416	0.295898	Amino Acids and Derivatives	Aromatic amino acids and derivatives	Phenylalanine and Tyrosine Branches from Chorismate	Cyclohexadienyl dehydrogenase (EC 1.3.1.12)(EC 1.3.1.43)
fig|6666666.293769.peg.1761	325.318	-0.877623	0.546476	-1.60597	0.108281	0.301745	Amino Acids and Derivatives	Lysine, threonine, methionine, and cysteine	Lysine Biosynthesis DAP Pathway	Aspartate-semialdehyde dehydrogenase (EC 1.2.1.11)
fig|6666666.293769.peg.2622	142.419	-0.911702	0.582331	-1.56561	0.11744	0.317891	Amino Acids and Derivatives	Alanine, serine, and glycine	Glycine and Serine Utilization	Aminomethyltransferase (glycine cleavage system T protein) (EC 2.1.2.10)
fig|6666666.293769.peg.2978	324.904	-0.332854	0.215632	-1.54362	0.12268	0.326085	Amino Acids and Derivatives	- none -	- none -	O-acetylhomoserine sulfhydrylase (EC 2.5.1.49) / O-succinylhomoserine sulfhydrylase (EC 2.5.1.48)
fig|6666666.293769.peg.1308	1680.01	0.460833	0.302062	1.52562	0.127104	0.333275	Amino Acids and Derivatives	Glutamine, glutamate, aspartate, asparagine; ammonia assimilation	Glutamine, Glutamate, Aspartate and Asparagine Biosynthesis	Glutamate synthase [NADPH] large chain (EC 1.4.1.13)
fig|6666666.293769.peg.3232	83.3471	-0.487744	0.322083	-1.51434	0.12994	0.338542	Amino Acids and Derivatives	Lysine, threonine, methionine, and cysteine	Threonine and Homoserine Biosynthesis	Aspartate aminotransferase (EC 2.6.1.1)
fig|6666666.293769.peg.571	866.63	0.402256	0.275297	1.46117	0.143968	0.357424	Amino Acids and Derivatives	Arginine; urea cycle, polyamines	Arginine Biosynthesis -- gjo	N-acetyl-gamma-glutamyl-phosphate reductase (EC 1.2.1.38)
fig|6666666.293769.peg.2986	255.761	-0.35891	0.249475	-1.43866	0.150246	0.365591	Amino Acids and Derivatives	Aromatic amino acids and derivatives	Common Pathway For Synthesis of Aromatic Compounds (DAHP synthase to chorismate)	3-dehydroquinate synthase (EC 4.2.3.4)
fig|6666666.293769.peg.1599	450.445	0.325727	0.229604	1.41865	0.156002	0.374752	Amino Acids and Derivatives	Aromatic amino acids and derivatives	Tryptophan synthesis	Anthranilate phosphoribosyltransferase (EC 2.4.2.18)
fig|6666666.293769.peg.1471	88.2959	0.59713	0.428925	1.39216	0.163875	0.386788	Amino Acids and Derivatives	Lysine, threonine, methionine, and cysteine	Cysteine Biosynthesis	Adenylylsulfate kinase (EC 2.7.1.25)
fig|6666666.293769.peg.1280	4.95138	-1.82891	1.34409	-1.3607	0.173608	0.401084	Amino Acids and Derivatives	Lysine, threonine, methionine, and cysteine	Cysteine Biosynthesis	Sulfate permease, Trk-type
fig|6666666.293769.peg.1757	148.985	0.640922	0.481725	1.33047	0.183363	0.414932	Amino Acids and Derivatives	Lysine, threonine, methionine, and cysteine	Cysteine Biosynthesis	Cys regulon transcriptional activator CysB
fig|6666666.293769.peg.2345	118.412	0.477629	0.36823	1.29709	0.194599	0.429162	Amino Acids and Derivatives	Proline and 4-hydroxyproline	Proline Synthesis	NADP-specific glutamate dehydrogenase (EC 1.4.1.4)
fig|6666666.293769.peg.3065	145.078	0.493621	0.380931	1.29583	0.195035	0.429162	Amino Acids and Derivatives	Lysine, threonine, methionine, and cysteine	Cysteine Biosynthesis	Sulfate permease
fig|6666666.293769.peg.449	202.453	-0.71052	0.553462	-1.28378	0.199221	0.43402	Amino Acids and Derivatives	Aromatic amino acids and derivatives	Common Pathway For Synthesis of Aromatic Compounds (DAHP synthase to chorismate)	3-dehydroquinate dehydratase II (EC 4.2.1.10)
fig|6666666.293769.peg.3061	159.119	0.320558	0.253856	1.26275	0.206678	0.443707	Amino Acids and Derivatives	- none -	- none -	Tryptophan synthase (indole-salvaging) (EC 4.2.1.122)
fig|6666666.293769.peg.56	107.513	0.778574	0.653528	1.19134	0.23352	0.480025	Amino Acids and Derivatives	Lysine, threonine, methionine, and cysteine	Lysine Biosynthesis DAP Pathway	2,3,4,5-tetrahydropyridine-2,6-dicarboxylate N-succinyltransferase (EC 2.3.1.117)
fig|6666666.293769.peg.580	1918.09	0.655818	0.551217	1.18976	0.234139	0.480083	Amino Acids and Derivatives	- none -	- none -	Cysteine desulfurase (EC 2.8.1.7) => IscS
fig|6666666.293769.peg.2770	221.943	0.327935	0.277972	1.17974	0.238103	0.484626	Amino Acids and Derivatives	Glutamine, glutamate, aspartate, asparagine; ammonia assimilation	Glutamine, Glutamate, Aspartate and Asparagine Biosynthesis	Asparagine synthetase [glutamine-hydrolyzing] (EC 6.3.5.4)
fig|6666666.293769.peg.2105	245.416	0.733813	0.63232	1.16051	0.245842	0.493769	Amino Acids and Derivatives	Arginine; urea cycle, polyamines	Arginine Biosynthesis -- gjo	Acetylornithine aminotransferase (EC 2.6.1.11)
fig|6666666.293769.peg.885	9.85299	1.13132	0.996232	1.13559	0.256126	0.505122	Amino Acids and Derivatives	- none -	- none -	Catalase KatE (EC 1.11.1.6)
fig|6666666.293769.peg.659	142.282	0.341781	0.323793	1.05555	0.291172	0.542502	Amino Acids and Derivatives	Histidine Metabolism	Histidine Biosynthesis	Imidazoleglycerol-phosphate dehydratase (EC 4.2.1.19)
fig|6666666.293769.peg.1971	231.342	-0.28701	0.272251	-1.05421	0.291787	0.54261	Amino Acids and Derivatives	- none -	- none -	ATP phosphoribosyltransferase (EC 2.4.2.17) => HisGs
fig|6666666.293769.peg.3026	261.79	0.336802	0.32112	1.04884	0.294254	0.545013	Amino Acids and Derivatives	- none -	- none -	N(6)-L-threonylcarbamoyladenine synthase (EC 2.3.1.234)
fig|6666666.293769.peg.1195	590.278	0.194807	0.186329	1.0455	0.295791	0.546761	Amino Acids and Derivatives	Proline and 4-hydroxyproline	Proline Synthesis	Gamma-glutamyl phosphate reductase (EC 1.2.1.41)
fig|6666666.293769.peg.661	422.215	0.236076	0.229234	1.02985	0.303081	0.554993	Amino Acids and Derivatives	Aromatic amino acids and derivatives	Chorismate: Intermediate for synthesis of Tryptophan, PAPA antibiotics, PABA, 3-hydroxyanthranilate and more.	Phosphoribosylformimino-5-aminoimidazole carboxamide ribotide isomerase (EC 5.3.1.16)
fig|6666666.293769.peg.402	314.943	-0.4533	0.449454	-1.00856	0.313187	0.566134	Amino Acids and Derivatives	Alanine, serine, and glycine	Glycine and Serine Utilization	D-3-phosphoglycerate dehydrogenase (EC 1.1.1.95)
fig|6666666.293769.peg.769	186.185	-0.317427	0.319768	-0.992679	0.320867	0.573822	Amino Acids and Derivatives	Lysine, threonine, methionine, and cysteine	Lysine Biosynthesis DAP Pathway	4-hydroxy-tetrahydrodipicolinate reductase (EC 1.17.1.8)
fig|6666666.293769.peg.662	505.169	-0.180472	0.18558	-0.972479	0.330812	0.586257	Amino Acids and Derivatives	- none -	- none -	Imidazole glycerol phosphate synthase cyclase subunit HisF
fig|6666666.293769.peg.2296	672.087	0.318878	0.329932	0.966496	0.333796	0.589221	Amino Acids and Derivatives	Lysine, threonine, methionine, and cysteine	Threonine and Homoserine Biosynthesis	Aspartate aminotransferase (EC 2.6.1.1)
fig|6666666.293769.peg.1788	45.7383	-0.363761	0.39138	-0.92943	0.352666	0.607397	Amino Acids and Derivatives	Glutamine, glutamate, aspartate, asparagine; ammonia assimilation	Glutamine, Glutamate, Aspartate and Asparagine Biosynthesis	Glutamate synthase [NADPH] large chain (EC 1.4.1.13)
fig|6666666.293769.peg.2416	9.42223	-0.853714	0.921174	-0.926767	0.354047	0.607799	Amino Acids and Derivatives	Alanine, serine, and glycine	Alanine biosynthesis	Cysteine desulfurase (EC 2.8.1.7)
fig|6666666.293769.peg.581	783.411	0.372092	0.405063	0.918603	0.358303	0.610202	Amino Acids and Derivatives	Alanine, serine, and glycine	Alanine biosynthesis	Iron-sulfur cluster assembly scaffold protein IscU
fig|6666666.293769.peg.2390	164.051	0.246108	0.273972	0.898297	0.369027	0.621342	Amino Acids and Derivatives	Amino Acids and Derivatives - no subcategory	Creatine and Creatinine Degradation	N-methylhydantoinase A (EC 3.5.2.14)
fig|6666666.293769.peg.3062	42.8656	0.539148	0.610087	0.883723	0.376846	0.631789	Amino Acids and Derivatives	Aromatic amino acids and derivatives	Tryptophan synthesis	Tryptophan synthase beta chain (EC 4.2.1.20)
fig|6666666.293769.peg.1232	65.055	-0.410387	0.468408	-0.876131	0.380959	0.635622	Amino Acids and Derivatives	- none -	- none -	5&#39;-methylthioadenosine phosphorylase (EC 2.4.2.28)
fig|6666666.293769.peg.1309	593.143	0.251704	0.287876	0.874348	0.381929	0.636689	Amino Acids and Derivatives	Glutamine, glutamate, aspartate, asparagine; ammonia assimilation	Glutamine, Glutamate, Aspartate and Asparagine Biosynthesis	Glutamate synthase [NADPH] small chain (EC 1.4.1.13)
fig|6666666.293769.peg.886	6.84621	1.05334	1.22321	0.86113	0.389166	0.643198	Amino Acids and Derivatives	- none -	- none -	Catalase KatE (EC 1.11.1.6)
fig|6666666.293769.peg.839	754.025	-0.398332	0.470921	-0.845857	0.397633	0.649409	Amino Acids and Derivatives	Lysine, threonine, methionine, and cysteine	Cysteine Biosynthesis	Sulfate transporter, CysZ-type
fig|6666666.293769.peg.400	172.906	-0.556858	0.658457	-0.845702	0.397719	0.649409	Amino Acids and Derivatives	Aromatic amino acids and derivatives	Phenylalanine and Tyrosine Branches from Chorismate	Biosynthetic Aromatic amino acid aminotransferase beta (EC 2.6.1.57)
fig|6666666.293769.peg.3664	7.33821	0.674872	0.803727	0.839679	0.401089	0.649601	Amino Acids and Derivatives	Lysine, threonine, methionine, and cysteine	Cysteine Biosynthesis	Sulfate permease, Trk-type
fig|6666666.293769.peg.584	951.769	0.429542	0.53027	0.810043	0.417915	0.664193	Amino Acids and Derivatives	Alanine, serine, and glycine	Alanine biosynthesis	Chaperone protein HscA
fig|6666666.293769.peg.235	48.5732	-0.418854	0.522721	-0.801295	0.422961	0.668838	Amino Acids and Derivatives	- none -	- none -	Catalase KatE (EC 1.11.1.6)
fig|6666666.293769.peg.2543	568.377	-0.218869	0.275427	-0.794653	0.426815	0.672447	Amino Acids and Derivatives	Lysine, threonine, methionine, and cysteine	Cysteine Biosynthesis	Sulfate permease
fig|6666666.293769.peg.170	157.167	0.283035	0.356271	0.794436	0.426942	0.672447	Amino Acids and Derivatives	- none -	- none -	Glutamate-pyruvate aminotransferase AlaC (EC 2.6.1.2)
fig|6666666.293769.peg.57	120.1	0.50216	0.635607	0.790048	0.4295	0.674458	Amino Acids and Derivatives	- none -	- none -	N-succinyl-L,L-diaminopimelate aminotransferase (EC 2.6.1.17), type 2
fig|6666666.293769.peg.1567	285.195	-0.225612	0.293902	-0.767645	0.442698	0.686667	Amino Acids and Derivatives	- none -	- none -	Glutamine--fructose-6-phosphate aminotransferase [isomerizing] (EC 2.6.1.16)
fig|6666666.293769.peg.1995	324.735	0.51969	0.681936	0.762081	0.446011	0.689512	Amino Acids and Derivatives	- none -	- none -	5-methyltetrahydrofolate--homocysteine methyltransferase (EC 2.1.1.13)
fig|6666666.293769.peg.2261	285.129	0.163417	0.215703	0.7576	0.448691	0.690178	Amino Acids and Derivatives	Arginine; urea cycle, polyamines	Arginine Biosynthesis -- gjo	Argininosuccinate lyase (EC 4.3.2.1)
fig|6666666.293769.peg.752	179.444	0.292634	0.388021	0.75417	0.450747	0.692185	Amino Acids and Derivatives	Aromatic amino acids and derivatives	Tryptophan synthesis	Aminodeoxychorismate lyase (EC 4.1.3.38)
fig|6666666.293769.peg.331	322.958	-0.214491	0.285115	-0.752296	0.451873	0.693625	Amino Acids and Derivatives	Branched-chain amino acids	Leucine Biosynthesis	2-isopropylmalate synthase (EC 2.3.3.13)
fig|6666666.293769.peg.403	235.262	-0.410673	0.549048	-0.747973	0.454476	0.695941	Amino Acids and Derivatives	Alanine, serine, and glycine	Glycine and Serine Utilization	Phosphoserine aminotransferase (EC 2.6.1.52)
fig|6666666.293769.peg.2579	894.397	0.221728	0.298705	0.742299	0.457906	0.700094	Amino Acids and Derivatives	- none -	- none -	Adenosylhomocysteinase (EC 3.3.1.1)
fig|6666666.293769.peg.2244	94.0885	-0.320648	0.434137	-0.738587	0.460158	0.701802	Amino Acids and Derivatives	Alanine, serine, and glycine	Glycine and Serine Utilization	Glycine cleavage system H protein
fig|6666666.293769.peg.52	196.199	-0.202627	0.278628	-0.72723	0.467085	0.706464	Amino Acids and Derivatives	Lysine, threonine, methionine, and cysteine	Lysine Biosynthesis DAP Pathway	N-succinyl-L,L-diaminopimelate desuccinylase (EC 3.5.1.18)
fig|6666666.293769.peg.1612	659.63	-0.143074	0.197262	-0.725299	0.468269	0.707575	Amino Acids and Derivatives	Branched-chain amino acids	Branched-Chain Amino Acid Biosynthesis	Dihydroxy-acid dehydratase (EC 4.2.1.9)
fig|6666666.293769.peg.311	279.472	-0.194412	0.270771	-0.717992	0.472762	0.710157	Amino Acids and Derivatives	Aromatic amino acids and derivatives	Tryptophan synthesis	Phosphoribosylanthranilate isomerase (EC 5.3.1.24)
fig|6666666.293769.peg.585	53.6806	0.377269	0.5385	0.700593	0.483557	0.720932	Amino Acids and Derivatives	Alanine, serine, and glycine	Alanine biosynthesis	Ferredoxin, 2Fe-2S
fig|6666666.293769.peg.625	405.37	-0.147729	0.213863	-0.690762	0.489715	0.726273	Amino Acids and Derivatives	Arginine; urea cycle, polyamines	Arginine Biosynthesis -- gjo	N-acetylglutamate synthase (EC 2.3.1.1)
fig|6666666.293769.peg.2616	72.2996	0.426163	0.630905	0.675479	0.499371	0.732064	Amino Acids and Derivatives	Lysine, threonine, methionine, and cysteine	Lysine Biosynthesis DAP Pathway	Diaminopimelate decarboxylase (EC 4.1.1.20)
fig|6666666.293769.peg.176	149.836	-0.219466	0.355148	-0.617956	0.536604	0.758591	Amino Acids and Derivatives	Lysine, threonine, methionine, and cysteine	Threonine and Homoserine Biosynthesis	Threonine synthase (EC 4.2.3.1)
fig|6666666.293769.peg.478	292.387	0.237401	0.387875	0.612056	0.540501	0.761455	Amino Acids and Derivatives	Alanine, serine, and glycine	Glycine and Serine Utilization	Serine hydroxymethyltransferase (EC 2.1.2.1)
fig|6666666.293769.peg.1054	189.446	-0.1981	0.342877	-0.577758	0.563427	0.77566	Amino Acids and Derivatives	- none -	- none -	Aspartate carbamoyltransferase (EC 2.1.3.2)
fig|6666666.293769.peg.1760	937.269	-0.261184	0.453184	-0.576331	0.564391	0.776499	Amino Acids and Derivatives	Branched-chain amino acids	Leucine Biosynthesis	3-isopropylmalate dehydrogenase (EC 1.1.1.85)
fig|6666666.293769.peg.2937	217.257	-0.16306	0.283148	-0.575882	0.564695	0.776499	Amino Acids and Derivatives	Aromatic amino acids and derivatives	Common Pathway For Synthesis of Aromatic Compounds (DAHP synthase to chorismate)	2-keto-3-deoxy-D-arabino-heptulosonate-7-phosphate synthase I alpha (EC 2.5.1.54)
fig|6666666.293769.peg.204	315.083	0.154688	0.269176	0.574673	0.565512	0.776499	Amino Acids and Derivatives	Histidine Metabolism	Histidine Biosynthesis	ATP phosphoribosyltransferase regulatory subunit (EC 2.4.2.17)
fig|6666666.293769.peg.427	52.2087	-0.266811	0.470231	-0.567404	0.57044	0.78067	Amino Acids and Derivatives	Alanine, serine, and glycine	Alanine biosynthesis	Ferredoxin, 2Fe-2S
fig|6666666.293769.peg.1311	253.454	-0.120986	0.216378	-0.55914	0.576066	0.783978	Amino Acids and Derivatives	Branched-chain amino acids	Branched-Chain Amino Acid Biosynthesis	Threonine dehydratase biosynthetic (EC 4.3.1.19)
fig|6666666.293769.peg.1375	93.0848	0.293342	0.546824	0.536448	0.591649	0.795939	Amino Acids and Derivatives	- none -	- none -	3-phosphoshikimate 1-carboxyvinyltransferase (EC 2.5.1.19)
fig|6666666.293769.peg.2107	49.026	0.360944	0.683645	0.52797	0.59752	0.796013	Amino Acids and Derivatives	Lysine, threonine, methionine, and cysteine	Threonine and Homoserine Biosynthesis	Homoserine kinase (EC 2.7.1.39)
fig|6666666.293769.peg.2617	35.0903	0.397557	0.759083	0.523734	0.600464	0.797694	Amino Acids and Derivatives	- none -	- none -	Diaminopimelate decarboxylase and/or diaminopimelate epimerase leader peptide
fig|6666666.293769.peg.2842	5.47942	-0.716619	1.41965	-0.504784	0.613711	0.805454	Amino Acids and Derivatives	Alanine, serine, and glycine	Alanine biosynthesis	Cysteine desulfurase (EC 2.8.1.7), SufS subfamily
fig|6666666.293769.peg.985	157.284	-0.249699	0.49535	-0.504085	0.614201	0.805811	Amino Acids and Derivatives	Arginine; urea cycle, polyamines	Arginine Biosynthesis -- gjo	Acetylglutamate kinase (EC 2.7.2.8)
fig|6666666.293769.peg.1118	227.816	-0.129961	0.262764	-0.494591	0.620889	0.809683	Amino Acids and Derivatives	Alanine, serine, and glycine	Glycine and Serine Utilization	Seryl-tRNA synthetase (EC 6.1.1.11)
fig|6666666.293769.peg.726	277.418	-0.0928935	0.195014	-0.476343	0.63383	0.818303	Amino Acids and Derivatives	Lysine, threonine, methionine, and cysteine	Cysteine Biosynthesis	Cysteine synthase B (EC 2.5.1.47)
fig|6666666.293769.peg.1086	836.446	0.110697	0.241716	0.457962	0.64698	0.825302	Amino Acids and Derivatives	Lysine, threonine, methionine, and cysteine	Lysine Biosynthesis DAP Pathway	4-hydroxy-tetrahydrodipicolinate synthase (EC 4.3.3.7)
fig|6666666.293769.peg.1088	45.1719	0.236712	0.529124	0.447365	0.654611	0.82854	Amino Acids and Derivatives	Alanine, serine, and glycine	Glycine cleavage system	Glycine cleavage system transcriptional antiactivator GcvR
fig|6666666.293769.peg.315	338.325	-0.111393	0.249553	-0.446369	0.655331	0.82854	Amino Acids and Derivatives	Aromatic amino acids and derivatives	Common Pathway For Synthesis of Aromatic Compounds (DAHP synthase to chorismate)	Chorismate synthase (EC 4.2.3.5)
fig|6666666.293769.peg.405	94.1988	0.272382	0.635986	0.428284	0.668445	0.838234	Amino Acids and Derivatives	- none -	- none -	Methylthioribose-1-phosphate isomerase (EC 5.3.1.23)
fig|6666666.293769.peg.579	1404.45	-0.241898	0.602469	-0.401511	0.688044	0.84777	Amino Acids and Derivatives	Alanine, serine, and glycine	Alanine biosynthesis	Iron-sulfur cluster regulator IscR
fig|6666666.293769.peg.1759	164.69	0.226874	0.582762	0.389308	0.697048	0.85365	Amino Acids and Derivatives	Branched-chain amino acids	Leucine Biosynthesis	3-isopropylmalate dehydratase small subunit (EC 4.2.1.33)
fig|6666666.293769.peg.2243	175.516	-0.131671	0.35697	-0.368858	0.712234	0.862831	Amino Acids and Derivatives	Alanine, serine, and glycine	Glycine and Serine Utilization	Glycine dehydrogenase [decarboxylating] (glycine cleavage system P1 protein) (EC 1.4.4.2)
fig|6666666.293769.peg.1598	240.342	0.114947	0.313501	0.366655	0.713876	0.863118	Amino Acids and Derivatives	Aromatic amino acids and derivatives	Tryptophan synthesis	Indole-3-glycerol phosphate synthase (EC 4.1.1.48)
fig|6666666.293769.peg.2275	792.663	-0.290473	0.867643	-0.334784	0.737788	0.875931	Amino Acids and Derivatives	- none -	- none -	5-methyltetrahydropteroyltriglutamate--homocysteine methyltransferase (EC 2.1.1.14)
fig|6666666.293769.peg.1489	942.65	0.066172	0.209539	0.315799	0.752155	0.886134	Amino Acids and Derivatives	Alanine, serine, and glycine	Glycine cleavage system	Sodium/glycine symporter GlyP
fig|6666666.293769.peg.753	75.5126	-0.123459	0.449941	-0.274389	0.783786	0.903722	Amino Acids and Derivatives	Aromatic amino acids and derivatives	Tryptophan synthesis	Para-aminobenzoate synthase, aminase component (EC 2.6.1.85)
fig|6666666.293769.peg.1758	406.535	0.165699	0.644948	0.256918	0.797242	0.910633	Amino Acids and Derivatives	Branched-chain amino acids	Leucine Biosynthesis	3-isopropylmalate dehydratase large subunit (EC 4.2.1.33)
fig|6666666.293769.peg.2242	177.651	0.0875149	0.35086	0.249429	0.803029	0.912759	Amino Acids and Derivatives	Alanine, serine, and glycine	Glycine and Serine Utilization	Glycine dehydrogenase [decarboxylating] (glycine cleavage system P2 protein) (EC 1.4.4.2)
fig|6666666.293769.peg.601	496.719	0.0511795	0.213187	0.240068	0.810277	0.916679	Amino Acids and Derivatives	Lysine, threonine, methionine, and cysteine	Lysine Biosynthesis DAP Pathway	Diaminopimelate epimerase (EC 5.1.1.7)
fig|6666666.293769.peg.1600	333.622	0.0988104	0.412483	0.239551	0.810679	0.916679	Amino Acids and Derivatives	Aromatic amino acids and derivatives	Tryptophan synthesis	Para-aminobenzoate synthase, amidotransferase component (EC 2.6.1.85)
fig|6666666.293769.peg.1728	395.92	0.0646443	0.344048	0.187893	0.85096	0.937076	Amino Acids and Derivatives	- none -	- none -	Ketol-acid reductoisomerase (NADP(+)) (EC 1.1.1.86)
fig|6666666.293769.peg.2344	286.102	-0.0449087	0.240243	-0.186931	0.851715	0.937076	Amino Acids and Derivatives	Proline and 4-hydroxyproline	Proline Synthesis	NADP-specific glutamate dehydrogenase (EC 1.4.1.4)
fig|6666666.293769.peg.1614	170.947	-0.0524077	0.280462	-0.186862	0.851769	0.937076	Amino Acids and Derivatives	Arginine; urea cycle, polyamines	Arginine Biosynthesis -- gjo	N-acetylglutamate synthase (EC 2.3.1.1)
fig|6666666.293769.peg.310	614.207	0.0300853	0.175129	0.171789	0.863604	0.940414	Amino Acids and Derivatives	Aromatic amino acids and derivatives	Tryptophan synthesis	Tryptophan synthase beta chain (EC 4.2.1.20)
fig|6666666.293769.peg.1970	355.224	-0.0701759	0.415875	-0.168743	0.865999	0.941103	Amino Acids and Derivatives	Histidine Metabolism	Histidine Biosynthesis	Histidinol dehydrogenase (EC 1.1.1.23)
fig|6666666.293769.peg.2104	205.752	-0.106038	0.65509	-0.161868	0.87141	0.942258	Amino Acids and Derivatives	Arginine; urea cycle, polyamines	Arginine Biosynthesis -- gjo	Ornithine carbamoyltransferase (EC 2.1.3.3)
fig|6666666.293769.peg.326	1513.23	0.0357549	0.262994	0.135953	0.891858	0.951247	Amino Acids and Derivatives	Lysine, threonine, methionine, and cysteine	Cysteine Biosynthesis	Sulfate permease
fig|6666666.293769.peg.1402	37.3761	0.072382	0.665318	0.108793	0.913367	0.962678	Amino Acids and Derivatives	Lysine, threonine, methionine, and cysteine	Cysteine Biosynthesis	Adenylylsulfate kinase (EC 2.7.1.25)
fig|6666666.293769.peg.1601	421.051	0.0268351	0.300229	0.0893821	0.928778	0.968846	Amino Acids and Derivatives	Aromatic amino acids and derivatives	Tryptophan synthesis	Anthranilate synthase, aminase component (EC 4.1.3.27)
fig|6666666.293769.peg.3208	373.185	-0.0241627	0.278548	-0.0867451	0.930874	0.969562	Amino Acids and Derivatives	- none -	- none -	S-adenosylmethionine synthetase (EC 2.5.1.6)
fig|6666666.293769.peg.2346	342.107	0.0182018	0.268044	0.0679061	0.94586	0.974699	Amino Acids and Derivatives	Proline and 4-hydroxyproline	Proline Synthesis	NADP-specific glutamate dehydrogenase (EC 1.4.1.4)
fig|6666666.293769.peg.309	184.944	0.0310471	0.486472	0.063821	0.949113	0.976899	Amino Acids and Derivatives	Aromatic amino acids and derivatives	Tryptophan synthesis	Tryptophan synthase alpha chain (EC 4.2.1.20)
fig|6666666.293769.peg.2985	85.471	0.0139973	0.301237	0.0464661	0.962939	0.985407	Amino Acids and Derivatives	Aromatic amino acids and derivatives	Common Pathway For Synthesis of Aromatic Compounds (DAHP synthase to chorismate)	Shikimate kinase I (EC 2.7.1.71)
fig|6666666.293769.peg.663	248.938	0.00678321	0.23958	0.0283129	0.977413	0.993159	Amino Acids and Derivatives	Histidine Metabolism	Histidine Biosynthesis	Phosphoribosyl-AMP cyclohydrolase (EC 3.5.4.19)
fig|6666666.293769.peg.482	24.1477	0.0246136	0.929348	0.0264849	0.978871	0.993159	Amino Acids and Derivatives	- none -	- none -	Lysine 2,3-aminomutase (EC 5.4.3.2)
fig|6666666.293769.peg.660	170.612	-0.00503878	0.257802	-0.0195452	0.984406	0.994939	Amino Acids and Derivatives	Histidine Metabolism	Histidine Biosynthesis	Imidazole glycerol phosphate synthase amidotransferase subunit (EC 2.4.2.-)
fig|6666666.293769.peg.3644	62.1739	-0.00046274	0.481431	-0.000961177	0.999233	0.999563	Amino Acids and Derivatives	Branched-chain amino acids	Leucine Biosynthesis	2-isopropylmalate synthase (EC 2.3.3.13)
fig|6666666.293769.peg.895	277.674	-1.87187	0.366617	-5.10579	3.29417e-07	0.000242714	Carbon Metabolism	- none -	- none -	Glycosyl transferase in large core OS assembly cluster
fig|6666666.293769.peg.788	789.805	1.64667	0.541658	3.04005	0.00236539	0.0277849	Carbon Metabolism	CO2 fixation	CO2 uptake, carboxysome	Ribulose bisphosphate carboxylase (EC 4.1.1.39)
fig|6666666.293769.peg.524	291.765	-0.710836	0.2541	-2.79747	0.00515047	0.0456114	Carbon Metabolism	- none -	- none -	UDP-N-acetylglucosamine 4,6-dehydratase (EC 4.2.1.135)
fig|6666666.293769.peg.554	193.984	1.08613	0.428387	2.5354	0.011232	0.0755087	Carbon Metabolism	- none -	- none -	Inositol-1-monophosphatase (EC 3.1.3.25)
fig|6666666.293769.peg.854	446.365	-0.73257	0.301325	-2.43116	0.0150504	0.0911936	Carbon Metabolism	Polysaccharides	Glycogen metabolism	4-alpha-glucanotransferase (amylomaltase) (EC 2.4.1.25)
fig|6666666.293769.peg.3358	11.4557	-2.41875	0.995455	-2.42979	0.0151075	0.0912391	Carbon Metabolism	Central carbohydrate metabolism	Glycolysis and Gluconeogenesis	Glucose-6-phosphate isomerase (EC 5.3.1.9)
fig|6666666.293769.peg.707	544.321	0.627485	0.260217	2.41139	0.0158918	0.0941244	Carbon Metabolism	Organic acids	Glycerate metabolism	Pyruvate kinase (EC 2.7.1.40)
fig|6666666.293769.peg.2517	24.9465	-2.19753	1.00475	-2.18714	0.0287323	0.136823	Carbon Metabolism	Central carbohydrate metabolism	Glycolysis and Gluconeogenesis	Glucose-6-phosphate isomerase (EC 5.3.1.9)
fig|6666666.293769.peg.1594	551.84	-0.862389	0.40054	-2.15307	0.0313134	0.144018	Carbon Metabolism	- none -	- none -	Glycosyltransferase
fig|6666666.293769.peg.2467	967.328	0.889674	0.414873	2.14445	0.031997	0.146068	Carbon Metabolism	Monosaccharides	Deoxyribose and Deoxynucleoside Catabolism	Purine nucleoside phosphorylase (EC 2.4.2.1)
fig|6666666.293769.peg.823	376.917	0.38591	0.181974	2.1207	0.0339474	0.151374	Carbon Metabolism	- none -	- none -	ADP-heptose synthase (EC 2.7.-.-) / D-glycero-beta-D-manno-heptose 7-phosphate kinase
fig|6666666.293769.peg.3944	34.2894	-1.59525	0.755897	-2.1104	0.0348236	0.153091	Carbon Metabolism	Central carbohydrate metabolism	Pentose phosphate pathway	6-phosphogluconate dehydrogenase, decarboxylating (EC 1.1.1.44)
fig|6666666.293769.peg.2468	276.392	-0.715934	0.352749	-2.02958	0.042399	0.172977	Carbon Metabolism	Monosaccharides	Deoxyribose and Deoxynucleoside Catabolism	Purine nucleoside phosphorylase (EC 2.4.2.1)
fig|6666666.293769.peg.2176	1400.6	0.472495	0.23857	1.98053	0.0476438	0.184947	Carbon Metabolism	- none -	- none -	Phosphoribulokinase (EC 2.7.1.19)
fig|6666666.293769.peg.420	545.759	0.47953	0.243432	1.96987	0.0488529	0.187865	Carbon Metabolism	Central carbohydrate metabolism	Pentose phosphate pathway	Ribose-phosphate pyrophosphokinase (EC 2.7.6.1)
fig|6666666.293769.peg.525	172.845	-0.67469	0.349305	-1.93152	0.0534186	0.197584	Carbon Metabolism	- none -	- none -	GDP-L-fucose synthetase (EC 1.1.1.271)
fig|6666666.293769.peg.920	557.254	-0.501956	0.262966	-1.90883	0.0562844	0.203728	Carbon Metabolism	- none -	- none -	GDP-mannose 4,6-dehydratase (EC 4.2.1.47)
fig|6666666.293769.peg.852	622.881	0.495843	0.263676	1.8805	0.0600394	0.211458	Carbon Metabolism	Polysaccharides	Glycogen metabolism	Glucose-1-phosphate adenylyltransferase (EC 2.7.7.27)
fig|6666666.293769.peg.787	34.7333	1.54392	0.828011	1.86461	0.0622362	0.215661	Carbon Metabolism	CO2 fixation	CO2 uptake, carboxysome	Rubisco activation protein CbbQ
fig|6666666.293769.peg.2020	17.6645	-1.61681	0.910788	-1.77517	0.0758692	0.240805	Carbon Metabolism	- none -	- none -	Phosphotransferase system, phosphocarrier protein HPr
fig|6666666.293769.peg.3039	916.306	0.483914	0.279915	1.72879	0.0838469	0.258487	Carbon Metabolism	Central carbohydrate metabolism	Pentose phosphate pathway	Ribulose-phosphate 3-epimerase (EC 5.1.3.1)
fig|6666666.293769.peg.855	91.4648	-0.749051	0.446908	-1.67607	0.093724	0.278003	Carbon Metabolism	Central carbohydrate metabolism	Glycolysis and Gluconeogenesis	Pyruvate,phosphate dikinase (EC 2.7.9.1)
fig|6666666.293769.peg.2595	104.402	-0.519196	0.315643	-1.64488	0.0999939	0.288644	Carbon Metabolism	- none -	- none -	Aldose 1-epimerase family protein YeaD
fig|6666666.293769.peg.790	308.013	0.418046	0.25663	1.62898	0.103316	0.294368	Carbon Metabolism	Monosaccharides	Mannose Metabolism	Mannose-6-phosphate isomerase (EC 5.3.1.8)
fig|6666666.293769.peg.2122	227.279	0.791242	0.488987	1.61813	0.105635	0.297524	Carbon Metabolism	Polysaccharides	Glycogen metabolism	Glycogen phosphorylase (EC 2.4.1.1)
fig|6666666.293769.peg.850	760.537	-0.462357	0.287162	-1.61009	0.107377	0.300363	Carbon Metabolism	Polysaccharides	Glycogen metabolism	Glycogen synthase, ADP-glucose transglucosylase (EC 2.4.1.21)
fig|6666666.293769.peg.2886	117.785	-0.569143	0.367585	-1.54833	0.121543	0.323998	Carbon Metabolism	Central carbohydrate metabolism	Glycolysis and Gluconeogenesis	Pyruvate,phosphate dikinase (EC 2.7.9.1)
fig|6666666.293769.peg.3040	1769.43	0.414718	0.275239	1.50675	0.131874	0.341407	Carbon Metabolism	Central carbohydrate metabolism	Glycolate, glyoxylate interconversions	Phosphoglycolate phosphatase (EC 3.1.3.18)
fig|6666666.293769.peg.789	50.4623	0.638794	0.426537	1.49763	0.13423	0.344258	Carbon Metabolism	CO2 fixation	CO2 uptake, carboxysome	RuBisCO operon transcriptional regulator CbbR
fig|6666666.293769.peg.379	3087.28	0.302748	0.207251	1.46078	0.144075	0.357424	Carbon Metabolism	Central carbohydrate metabolism	Pentose phosphate pathway	Transketolase (EC 2.2.1.1)
fig|6666666.293769.peg.397	9.7172	-1.67834	1.1747	-1.42874	0.153078	0.369797	Carbon Metabolism	- none -	- none -	Inositol-1-monophosphatase (EC 3.1.3.25)
fig|6666666.293769.peg.3078	22.5779	-1.04503	0.746884	-1.39918	0.161758	0.383472	Carbon Metabolism	Polysaccharides	Glycogen metabolism	Glycogen phosphorylase (EC 2.4.1.1)
fig|6666666.293769.peg.2245	105.732	0.592994	0.429842	1.37956	0.167721	0.392557	Carbon Metabolism	- none -	- none -	Aconitate hydratase 2 (EC 4.2.1.3)
fig|6666666.293769.peg.137	431.821	0.619535	0.449888	1.37709	0.168486	0.393846	Carbon Metabolism	Central carbohydrate metabolism	Glycolysis and Gluconeogenesis	Triosephosphate isomerase (EC 5.3.1.1)
fig|6666666.293769.peg.2884	19.63	-0.777444	0.579276	-1.3421	0.179564	0.408778	Carbon Metabolism	Central carbohydrate metabolism	Glycolysis and Gluconeogenesis	Pyruvate,phosphate dikinase (EC 2.7.9.1)
fig|6666666.293769.peg.1137	151.342	-0.367652	0.276907	-1.32771	0.184273	0.416225	Carbon Metabolism	- none -	- none -	Glycosyl transferase, family 2
fig|6666666.293769.peg.2466	1281.04	0.230651	0.176083	1.3099	0.190229	0.42389	Carbon Metabolism	Monosaccharides	Deoxyribose and Deoxynucleoside Catabolism	Phosphopentomutase (EC 5.4.2.7)
fig|6666666.293769.peg.3223	10.1313	-0.868907	0.663464	-1.30965	0.190313	0.42389	Carbon Metabolism	Polysaccharides	Glycogen metabolism	Glycogen phosphorylase (EC 2.4.1.1)
fig|6666666.293769.peg.2883	4.8292	1.52556	1.17837	1.29464	0.195446	0.429351	Carbon Metabolism	Central carbohydrate metabolism	Glycolysis and Gluconeogenesis	Pyruvate,phosphate dikinase (EC 2.7.9.1)
fig|6666666.293769.peg.2860	31.0887	-1.17258	0.93894	-1.24883	0.211726	0.450346	Carbon Metabolism	Central carbohydrate metabolism	Pyruvate metabolism II: acetyl-CoA, acetogenesis from pyruvate	Acetate kinase (EC 2.7.2.1)
fig|6666666.293769.peg.143	173.626	0.330611	0.269457	1.22695	0.21984	0.461739	Carbon Metabolism	- none -	- none -	Methionyl-tRNA formyltransferase (EC 2.1.2.9)
fig|6666666.293769.peg.921	445.652	-0.457255	0.379695	-1.20427	0.228485	0.473742	Carbon Metabolism	- none -	- none -	glycosyl transferase, group 1 family protein
fig|6666666.293769.peg.2143	402.062	0.366887	0.316182	1.16037	0.2459	0.493769	Carbon Metabolism	- none -	- none -	Fumarate hydratase class I, aerobic (EC 4.2.1.2)
fig|6666666.293769.peg.269	622.075	-0.220832	0.196781	-1.12223	0.261766	0.512951	Carbon Metabolism	- none -	- none -	2,3-bisphosphoglycerate-independent phosphoglycerate mutase (EC 5.4.2.12)
fig|6666666.293769.peg.1018	204.007	-0.4193	0.375046	-1.118	0.263568	0.515238	Carbon Metabolism	Carbohydrates - no subcategory	Carbon storage regulator	Carbon storage regulator
fig|6666666.293769.peg.2463	349.522	-0.471697	0.422671	-1.11599	0.264427	0.516242	Carbon Metabolism	Monosaccharides	Deoxyribose and Deoxynucleoside Catabolism	Na+ dependent nucleoside transporter NupC
fig|6666666.293769.peg.3437	76.8176	-0.574761	0.516086	-1.11369	0.265411	0.517889	Carbon Metabolism	- none -	- none -	Glycosyltransferase (EC 2.4.1.-) in large core OS assembly cluster
fig|6666666.293769.peg.1683	604.917	-0.260262	0.236462	-1.10065	0.271049	0.523347	Carbon Metabolism	- none -	- none -	Cryptic sugar kinase Mak
fig|6666666.293769.peg.984	455.924	0.627425	0.572253	1.09641	0.272899	0.525509	Carbon Metabolism	Monosaccharides	Mannose Metabolism	Phosphomannomutase (EC 5.4.2.8)
fig|6666666.293769.peg.2885	10.1214	-1.12657	1.0319	-1.09174	0.274947	0.526958	Carbon Metabolism	Central carbohydrate metabolism	Glycolysis and Gluconeogenesis	Pyruvate,phosphate dikinase (EC 2.7.9.1)
fig|6666666.293769.peg.509	212.89	-0.361367	0.331186	-1.09113	0.275216	0.526958	Carbon Metabolism	- none -	- none -	Fe-S protein, homolog of lactate dehydrogenase SO1521
fig|6666666.293769.peg.2962	183.831	-0.373238	0.34944	-1.0681	0.285474	0.536734	Carbon Metabolism	- none -	- none -	Acetyl-CoA synthetase (EC 6.2.1.1)
fig|6666666.293769.peg.519	339.144	-0.351159	0.33024	-1.06335	0.287625	0.538694	Carbon Metabolism	- none -	- none -	GDP-mannose 4,6-dehydratase (EC 4.2.1.47)
fig|6666666.293769.peg.1103	684.811	0.481853	0.459325	1.04905	0.294157	0.545013	Carbon Metabolism	Central carbohydrate metabolism	Glycolysis and Gluconeogenesis	Pyrophosphate-dependent fructose 6-phosphate-1-kinase (EC 2.7.1.90)
fig|6666666.293769.peg.791	205.404	-0.308444	0.29952	-1.02979	0.303107	0.554993	Carbon Metabolism	Monosaccharides	Mannose Metabolism	Phosphomannomutase (EC 5.4.2.8)
fig|6666666.293769.peg.3376	297.034	0.376778	0.367687	1.02473	0.305492	0.557698	Carbon Metabolism	- none -	- none -	Aconitate hydratase 2 (EC 4.2.1.3)
fig|6666666.293769.peg.1115	329.083	-0.387439	0.38072	-1.01765	0.308846	0.561317	Carbon Metabolism	Organic acids	Glycerate metabolism	Glycerate kinase (EC 2.7.1.31)
fig|6666666.293769.peg.1729	260.447	0.213995	0.214741	0.996524	0.318996	0.5727	Carbon Metabolism	Fermentation	Acetolactate synthase subunits	Acetolactate synthase small subunit (EC 2.2.1.6)
fig|6666666.293769.peg.853	688.754	-0.243645	0.248855	-0.979066	0.327548	0.58294	Carbon Metabolism	- none -	- none -	Amylopullulanase
fig|6666666.293769.peg.883	158.816	0.432298	0.444313	0.97296	0.330573	0.586257	Carbon Metabolism	Central carbohydrate metabolism	Pyruvate Alanine Serine Interconversions	L-alanine:glyoxylate aminotransferase (EC 2.6.1.44)
fig|6666666.293769.peg.1593	132.248	-0.437059	0.459014	-0.95217	0.341011	0.596755	Carbon Metabolism	- none -	- none -	Glycosyltransferase
fig|6666666.293769.peg.915	169.597	0.358996	0.400866	0.895552	0.370492	0.623238	Carbon Metabolism	- none -	- none -	Glycosyltransferase
fig|6666666.293769.peg.1943	55.299	0.517943	0.606907	0.853414	0.39343	0.646181	Carbon Metabolism	- none -	- none -	Phosphoglucomutase (EC 5.4.2.2)
fig|6666666.293769.peg.1968	1455.06	0.230735	0.27282	0.845738	0.397699	0.649409	Carbon Metabolism	Organic acids	Glycerate metabolism	Pyruvate kinase (EC 2.7.1.40)
fig|6666666.293769.peg.257	66.7111	0.338277	0.401368	0.842812	0.399334	0.649409	Carbon Metabolism	Central carbohydrate metabolism	Glycolate, glyoxylate interconversions	Glycolate dehydrogenase (EC 1.1.99.14), iron-sulfur subunit GlcF
fig|6666666.293769.peg.1684	156.02	0.288286	0.342263	0.842295	0.399623	0.649409	Carbon Metabolism	- none -	- none -	Cryptic sugar kinase Mak
fig|6666666.293769.peg.1890	41.6236	0.34866	0.415712	0.838706	0.401634	0.649728	Carbon Metabolism	Central carbohydrate metabolism	Pyruvate Alanine Serine Interconversions	Alanine dehydrogenase (EC 1.4.1.1)
fig|6666666.293769.peg.83	301.771	0.354271	0.422513	0.838483	0.401759	0.649728	Carbon Metabolism	Central carbohydrate metabolism	Glycolysis and Gluconeogenesis	Enolase (EC 4.2.1.11)
fig|6666666.293769.peg.943	248.793	0.224617	0.28897	0.777302	0.43698	0.68159	Carbon Metabolism	Central carbohydrate metabolism	Glycolysis and Gluconeogenesis	Glucokinase (EC 2.7.1.2)
fig|6666666.293769.peg.2464	461.383	-0.276091	0.363958	-0.758578	0.448105	0.690171	Carbon Metabolism	Monosaccharides	Deoxyribose and Deoxynucleoside Catabolism	Deoxyribose-phosphate aldolase (EC 4.1.2.4)
fig|6666666.293769.peg.1299	75.0634	-0.235677	0.318228	-0.740593	0.45894	0.70093	Carbon Metabolism	Central carbohydrate metabolism	Pyruvate Alanine Serine Interconversions	Valine--pyruvate aminotransferase (EC 2.6.1.66)
fig|6666666.293769.peg.1889	23.2541	-0.6265	0.85122	-0.736003	0.461729	0.702606	Carbon Metabolism	Central carbohydrate metabolism	Pyruvate Alanine Serine Interconversions	Alanine dehydrogenase (EC 1.4.1.1)
fig|6666666.293769.peg.2996	368.956	-0.191746	0.266151	-0.72044	0.471254	0.709191	Carbon Metabolism	Central carbohydrate metabolism	Glycolysis and Gluconeogenesis	Glucose-6-phosphate isomerase (EC 5.3.1.9)
fig|6666666.293769.peg.215	27.884	0.342641	0.494586	0.692783	0.488446	0.725015	Carbon Metabolism	- none -	- none -	Ketohexokinase (EC 2.7.1.3)
fig|6666666.293769.peg.2135	164.989	0.193732	0.281639	0.687873	0.491533	0.726273	Carbon Metabolism	One-carbon Metabolism	One-carbon metabolism by tetrahydropterines	Methenyltetrahydrofolate cyclohydrolase (EC 3.5.4.9)
fig|6666666.293769.peg.426	118.552	0.341222	0.496811	0.686825	0.492193	0.726273	Carbon Metabolism	Central carbohydrate metabolism	Glycolate, glyoxylate interconversions	Glycolate dehydrogenase (EC 1.1.99.14), iron-sulfur subunit GlcF
fig|6666666.293769.peg.255	267.962	0.195919	0.293278	0.668031	0.504114	0.734634	Carbon Metabolism	Central carbohydrate metabolism	Glycolate, glyoxylate interconversions	Glycolate dehydrogenase (EC 1.1.99.14), subunit GlcD
fig|6666666.293769.peg.1753	71.6643	-0.352079	0.596182	-0.590556	0.554818	0.770139	Carbon Metabolism	Central carbohydrate metabolism	Glycolysis and Gluconeogenesis	NAD-dependent glyceraldehyde-3-phosphate dehydrogenase (EC 1.2.1.12)
fig|6666666.293769.peg.1313	174.124	-0.184049	0.325259	-0.565853	0.571494	0.781123	Carbon Metabolism	One-carbon Metabolism	One-carbon metabolism by tetrahydropterines	5-formyltetrahydrofolate cyclo-ligase (EC 6.3.3.2)
fig|6666666.293769.peg.375	1176.32	-0.104246	0.190711	-0.546618	0.584641	0.790102	Carbon Metabolism	Organic acids	Glycerate metabolism	Pyruvate kinase (EC 2.7.1.40)
fig|6666666.293769.peg.856	122.517	-0.21401	0.416704	-0.513578	0.607547	0.801483	Carbon Metabolism	Central carbohydrate metabolism	Glycolysis and Gluconeogenesis	Pyruvate,phosphate dikinase (EC 2.7.9.1)
fig|6666666.293769.peg.3457	226.213	-0.153771	0.307701	-0.499741	0.617257	0.807915	Carbon Metabolism	Monosaccharides	D-ribose utilization	Ribose 5-phosphate isomerase A (EC 5.3.1.6)
fig|6666666.293769.peg.3357	14.1807	0.360057	0.729939	0.49327	0.621822	0.809713	Carbon Metabolism	Central carbohydrate metabolism	Glycolysis and Gluconeogenesis	Glucose-6-phosphate isomerase (EC 5.3.1.9)
fig|6666666.293769.peg.1802	52.4289	-0.182708	0.377052	-0.484569	0.627982	0.814151	Carbon Metabolism	Central carbohydrate metabolism	Pyruvate Alanine Serine Interconversions	D-alanine aminotransferase (EC 2.6.1.21)
fig|6666666.293769.peg.374	1273.79	0.131872	0.279734	0.471419	0.637342	0.820394	Carbon Metabolism	Central carbohydrate metabolism	Glycolysis and Gluconeogenesis	Fructose-bisphosphate aldolase class II (EC 4.1.2.13)
fig|6666666.293769.peg.786	150.541	0.175278	0.438723	0.399519	0.68951	0.84777	Carbon Metabolism	CO2 fixation	CO2 uptake, carboxysome	Rubisco activation protein CbbO
fig|6666666.293769.peg.1730	621.794	0.0984225	0.269656	0.364993	0.715117	0.864334	Carbon Metabolism	Fermentation	Acetolactate synthase subunits	Acetolactate synthase large subunit (EC 2.2.1.6)
fig|6666666.293769.peg.437	74.1152	0.12876	0.363552	0.354173	0.72321	0.870119	Carbon Metabolism	- none -	- none -	UTP--glucose-1-phosphate uridylyltransferase (EC 2.7.7.9)
fig|6666666.293769.peg.1357	1109.43	0.115193	0.373213	0.308653	0.757586	0.889119	Carbon Metabolism	Central carbohydrate metabolism	Pyruvate metabolism II: acetyl-CoA, acetogenesis from pyruvate	Dihydrolipoamide dehydrogenase of pyruvate dehydrogenase complex (EC 1.8.1.4)
fig|6666666.293769.peg.1358	742.257	-0.0974747	0.327685	-0.297464	0.766112	0.894165	Carbon Metabolism	Central carbohydrate metabolism	Pyruvate metabolism II: acetyl-CoA, acetogenesis from pyruvate	Dihydrolipoamide acetyltransferase component of pyruvate dehydrogenase complex (EC 2.3.1.12)
fig|6666666.293769.peg.1359	1294.25	0.0946338	0.334287	0.283092	0.777107	0.900271	Carbon Metabolism	Central carbohydrate metabolism	Pyruvate metabolism II: acetyl-CoA, acetogenesis from pyruvate	Pyruvate dehydrogenase E1 component (EC 1.2.4.1)
fig|6666666.293769.peg.2220	137.341	0.120909	0.429806	0.28131	0.778472	0.900666	Carbon Metabolism	Central carbohydrate metabolism	Pyruvate metabolism I: anaplerotic reactions, PEP	Phosphoenolpyruvate carboxylase (EC 4.1.1.31)
fig|6666666.293769.peg.842	94.2557	0.117076	0.462898	0.252919	0.80033	0.911412	Carbon Metabolism	- none -	- none -	Carbohydrate kinase, FGGY family
fig|6666666.293769.peg.1170	362.488	0.0539784	0.259594	0.207934	0.83528	0.931912	Carbon Metabolism	Monosaccharides	Deoxyribose and Deoxynucleoside Catabolism	Putative deoxyribonuclease YjjV
fig|6666666.293769.peg.2881	59.6604	0.0824827	0.403622	0.204356	0.838075	0.932899	Carbon Metabolism	- none -	- none -	Sugar kinase
fig|6666666.293769.peg.1983	186.614	0.0735835	0.372387	0.197599	0.843359	0.93526	Carbon Metabolism	Central carbohydrate metabolism	Pyruvate metabolism I: anaplerotic reactions, PEP	NADP-dependent malic enzyme (EC 1.1.1.40)
fig|6666666.293769.peg.2580	279.665	-0.0642411	0.330669	-0.194276	0.84596	0.93589	Carbon Metabolism	One-carbon Metabolism	One-carbon metabolism by tetrahydropterines	5,10-methylenetetrahydrofolate reductase (EC 1.5.1.20)
fig|6666666.293769.peg.2234	484.836	0.0554504	0.293384	0.189002	0.850091	0.937076	Carbon Metabolism	- none -	- none -	Phosphoenolpyruvate-protein phosphotransferase of PTS system (EC 2.7.3.9)
fig|6666666.293769.peg.3231	92.0497	-0.0504753	0.270296	-0.186741	0.851864	0.937076	Carbon Metabolism	- none -	- none -	Xylulose-1,5-bisphosphate phosphatase CbbY, converts this Rubisco inhibiting byproduct to xylulose-5P
fig|6666666.293769.peg.903	247.5	0.069055	0.373691	0.184792	0.853392	0.937228	Carbon Metabolism	Central carbohydrate metabolism	Pyruvate Alanine Serine Interconversions	Branched-chain amino acid aminotransferase (EC 2.6.1.42)
fig|6666666.293769.peg.1300	60.9415	-0.068037	0.388774	-0.175004	0.861076	0.939871	Carbon Metabolism	- none -	- none -	Sugar fermentation stimulation protein SfsA
fig|6666666.293769.peg.1833	322.471	-0.0404601	0.262573	-0.154091	0.877538	0.946403	Carbon Metabolism	Central carbohydrate metabolism	Pyruvate Alanine Serine Interconversions	Alanine racemase (EC 5.1.1.1)
fig|6666666.293769.peg.1613	60.995	-0.0397061	0.331088	-0.119926	0.904542	0.957844	Carbon Metabolism	Central carbohydrate metabolism	Pyruvate metabolism II: acetyl-CoA, acetogenesis from pyruvate	Acetate permease ActP (cation/acetate symporter)
fig|6666666.293769.peg.1630	817.958	-0.0252678	0.302429	-0.0835494	0.933415	0.971659	Carbon Metabolism	- none -	- none -	Glyceraldehyde-3-phosphate: ferredoxin oxidoreductase (EC 1.2.7.6)
fig|6666666.293769.peg.378	1234.99	-0.0182133	0.338381	-0.053825	0.957075	0.982135	Carbon Metabolism	Central carbohydrate metabolism	Glycolysis and Gluconeogenesis	NAD-dependent glyceraldehyde-3-phosphate dehydrogenase (EC 1.2.1.12)
fig|6666666.293769.peg.256	70.6837	0.0158266	0.432927	0.0365572	0.970838	0.991288	Carbon Metabolism	Central carbohydrate metabolism	Glycolate, glyoxylate interconversions	Glycolate dehydrogenase (EC 1.1.99.14), FAD-binding subunit GlcE
fig|6666666.293769.peg.851	1303.23	0.00766411	0.270387	0.028345	0.977387	0.993159	Carbon Metabolism	Polysaccharides	Glycogen metabolism	1,4-alpha-glucan (glycogen) branching enzyme, GH-13-type (EC 2.4.1.18)
fig|6666666.293769.peg.377	762.528	-0.00509959	0.200442	-0.0254417	0.979703	0.993538	Carbon Metabolism	Central carbohydrate metabolism	Glycolysis and Gluconeogenesis	Phosphoglycerate kinase (EC 2.7.2.3)
fig|6666666.293769.peg.1878	115.449	0.00681355	0.392197	0.0173728	0.986139	0.996199	Carbon Metabolism	Central carbohydrate metabolism	Methylglyoxal Metabolism	Hydroxyacylglutathione hydrolase (EC 3.1.2.6)
fig|6666666.293769.peg.1581	158.127	-1.18092	0.316437	-3.73194	0.000190012	0.00696901	Cell cycle	- none -	- none -	Segregation and condensation protein B
fig|6666666.293769.peg.1181	167.082	-1.55964	0.465786	-3.34839	0.000812812	0.0144688	Cell cycle	- none -	- none -	Cell division protein FtsQ
fig|6666666.293769.peg.3685	56.1718	-1.29351	0.403922	-3.20238	0.00136298	0.0197686	Cell cycle	- none -	- none -	Septum-associated rare lipoprotein A
fig|6666666.293769.peg.550	366.362	-1.16803	0.49506	-2.35936	0.0183063	0.102493	Cell cycle	- none -	Stationary phase repair cluster	Cell division protein FtsL
fig|6666666.293769.peg.2280	354.199	-0.806983	0.368093	-2.19233	0.0283554	0.13584	Cell cycle	- none -	- none -	Cell division protein ZapD
fig|6666666.293769.peg.2272	4261.77	-0.793637	0.383347	-2.07028	0.0384258	0.161141	Cell cycle	- none -	- none -	Cell division protein FtsH
fig|6666666.293769.peg.1182	410.875	-0.728632	0.361223	-2.01712	0.0436825	0.176454	Cell cycle	- none -	- none -	Cell division protein FtsA
fig|6666666.293769.peg.2136	441.888	1.10891	0.565409	1.96125	0.0498495	0.189913	Cell cycle	- none -	- none -	Cell division trigger factor (EC 5.2.1.8)
fig|6666666.293769.peg.1854	195.22	0.86111	0.439479	1.95939	0.0500672	0.189956	Cell cycle	- none -	- none -	Cell division protein BolA
fig|6666666.293769.peg.3902	263.721	-0.493378	0.304587	-1.61982	0.10527	0.296949	Cell cycle	- none -	- none -	Septum formation protein Maf
fig|6666666.293769.peg.544	529.693	-0.319651	0.212574	-1.50372	0.132654	0.341452	Cell cycle	- none -	- none -	Cell division protein FtsW
fig|6666666.293769.peg.280	92.4467	-0.505735	0.371959	-1.35966	0.173939	0.401266	Cell cycle	- none -	CBSS-176299.4.peg.1292; <br>Glycyl-tRNA synthetase containing cluster	GTP-binding protein Era
fig|6666666.293769.peg.549	1559.82	-0.284777	0.24933	-1.14217	0.253384	0.501326	Cell cycle	- none -	CBSS-83331.1.peg.3039	Cell division protein FtsI [Peptidoglycan synthetase] (EC 2.4.1.129)
fig|6666666.293769.peg.552	805.545	-0.405984	0.356956	-1.13735	0.255392	0.503944	Cell cycle	- none -	- none -	Cell division protein MraZ
fig|6666666.293769.peg.1315	155.939	0.356109	0.317264	1.12243	0.261678	0.512951	Cell cycle	- none -	- none -	Z-ring-associated protein ZapA
fig|6666666.293769.peg.2508	71.9133	0.667747	0.656126	1.01771	0.308815	0.561317	Cell cycle	- none -	- none -	Cell division protein FtsK
fig|6666666.293769.peg.1530	165.132	0.223906	0.242424	0.923613	0.355688	0.609553	Cell cycle	- none -	- none -	Cell-division-associated, ABC-transporter-like signaling protein FtsX
fig|6666666.293769.peg.1183	462.061	-0.259239	0.283104	-0.915704	0.359822	0.611444	Cell cycle	- none -	- none -	Cell division protein FtsZ
fig|6666666.293769.peg.1215	420.797	-0.29806	0.371552	-0.802201	0.422436	0.668495	Cell cycle	- none -	Septum site-determining cluster Min	Septum site-determining protein MinC
fig|6666666.293769.peg.422	82.1529	0.348167	0.515495	0.675403	0.49942	0.732064	Cell cycle	Dormancy and Sporulation - no subcategory	Sporulation-associated proteins with broader functions	Peptidyl-tRNA hydrolase (EC 3.1.1.29)
fig|6666666.293769.peg.1531	63.8173	-0.355094	0.569016	-0.62405	0.532595	0.757816	Cell cycle	- none -	- none -	Cell-division-associated, ABC-transporter-like signaling protein FtsE
fig|6666666.293769.peg.1092	155.264	-0.226027	0.524642	-0.430822	0.666598	0.837852	Cell cycle	- none -	CBSS-211586.9.peg.2729	Intracellular septation protein IspA
fig|6666666.293769.peg.161	276.359	0.156215	0.377176	0.414169	0.67875	0.843477	Cell cycle	- none -	- none -	GTP-binding protein EngB
fig|6666666.293769.peg.1216	438.852	0.141991	0.374099	0.379555	0.704276	0.857154	Cell cycle	- none -	Septum site-determining cluster Min	Septum site-determining protein MinD
fig|6666666.293769.peg.1217	87.9885	0.267733	0.726945	0.368299	0.71265	0.862909	Cell cycle	- none -	Septum site-determining cluster Min	Cell division topological specificity factor MinE
fig|6666666.293769.peg.835	56.1384	-0.111572	0.510511	-0.21855	0.827001	0.927167	Cell cycle	- none -	Stationary phase repair cluster	FIG139438: lipoprotein B
fig|6666666.293769.peg.1560	84.1447	0.108146	0.750609	0.144077	0.885439	0.950146	Cell cycle	- none -	- none -	Cell division integral membrane protein, YggT and half-length relatives
fig|6666666.293769.peg.1097	501.153	-0.0229746	0.254316	-0.0903387	0.928018	0.968846	Cell cycle	- none -	- none -	Segregation and condensation protein A
fig|6666666.293769.peg.522	152.705	-1.50571	0.283426	-5.31253	1.08115e-07	9.95735e-05	Cell Wall and Capsule	Capsular and extracellular polysacchrides	Rhamnose containing glycans	UDP-glucose 4-epimerase (EC 5.1.3.2)
fig|6666666.293769.peg.896	190.07	-2.01886	0.430115	-4.69377	2.68222e-06	0.000855226	Cell Wall and Capsule	- none -	- none -	Heptose kinase WapQ, eukaryotic type
fig|6666666.293769.peg.897	323.986	-2.12464	0.472585	-4.49579	6.93135e-06	0.00159594	Cell Wall and Capsule	- none -	- none -	Lipopolysaccharide core heptose(I) kinase RfaP
fig|6666666.293769.peg.51	296.289	-1.0612	0.272876	-3.88897	0.000100671	0.00547049	Cell Wall and Capsule	Capsular and extracellular polysacchrides	Rhamnose containing glycans	UDP-glucose 4-epimerase (EC 5.1.3.2)
fig|6666666.293769.peg.545	459.432	-1.04405	0.293617	-3.55583	0.000376791	0.00957309	Cell Wall and Capsule	- none -	- none -	UDP-N-acetylmuramoylalanine--D-glutamate ligase (EC 6.3.2.9)
fig|6666666.293769.peg.1675	125.925	1.83493	0.566455	3.23933	0.00119812	0.0182391	Cell Wall and Capsule	- none -	- none -	2-polyprenylphenol hydroxylase and related flavodoxin oxidoreductases / CDP-6-deoxy-delta-3,4-glucoseen reductase-like
fig|6666666.293769.peg.1306	91.2396	-1.52722	0.481275	-3.17328	0.00150727	0.0209538	Cell Wall and Capsule	- none -	- none -	Uncharacterized membrane protein, YraQ family
fig|6666666.293769.peg.834	1993.72	-1.71387	0.544583	-3.14713	0.00164882	0.0220082	Cell Wall and Capsule	- none -	- none -	Murein hydrolase activator NlpD
fig|6666666.293769.peg.1228	99.2662	0.976285	0.337482	2.89285	0.00381764	0.0375467	Cell Wall and Capsule	- none -	- none -	beta-N-acetylglucosaminidase (EC 3.2.1.52)
fig|6666666.293769.peg.3025	101.884	0.827154	0.329353	2.51145	0.0120237	0.0793822	Cell Wall and Capsule	- none -	- none -	Acyl-phosphate:glycerol-3-phosphate O-acyltransferase PlsY (EC 2.3.1.n3)
fig|6666666.293769.peg.547	786.452	-0.586476	0.237531	-2.46905	0.0135472	0.0850222	Cell Wall and Capsule	- none -	- none -	UDP-N-acetylmuramoyl-tripeptide--D-alanyl-D-alanine ligase (EC 6.3.2.10)
fig|6666666.293769.peg.2167	104.806	-0.858855	0.357665	-2.40128	0.0163378	0.0958412	Cell Wall and Capsule	Cell Wall and Capsule - no subcategory	Recycling of Peptidoglycan Amino Acids	AmpG permease
fig|6666666.293769.peg.1178	472.068	-0.578397	0.242837	-2.38183	0.0172267	0.0990067	Cell Wall and Capsule	- none -	- none -	UDP-N-acetylmuramate--L-alanine ligase (EC 6.3.2.8)
fig|6666666.293769.peg.2581	10.5277	2.36348	1.00073	2.36177	0.0181881	0.102142	Cell Wall and Capsule	- none -	- none -	putative membrane protein
fig|6666666.293769.peg.1879	141.141	-0.769127	0.331224	-2.32208	0.0202289	0.109593	Cell Wall and Capsule	- none -	- none -	Membrane-bound lytic murein transglycosylase D
fig|6666666.293769.peg.820	48.0381	-1.27289	0.609617	-2.08801	0.0367969	0.157769	Cell Wall and Capsule	- none -	- none -	3-deoxy-D-manno-octulosonic acid transferase (EC 2.4.99.12)(EC 2.4.99.13)
fig|6666666.293769.peg.3057	199.994	0.594792	0.289002	2.05809	0.0395812	0.164765	Cell Wall and Capsule	- none -	- none -	Uncharacterized lipoprotein Bmul_4930
fig|6666666.293769.peg.692	358.774	-0.813673	0.397429	-2.04734	0.0406245	0.168158	Cell Wall and Capsule	- none -	- none -	Putative membrane protein YfjD
fig|6666666.293769.peg.2205	502.246	-0.533214	0.2616	-2.03828	0.0415218	0.170531	Cell Wall and Capsule	Cell Wall and Capsule - no subcategory	Murein Hydrolases	Soluble lytic murein transglycosylase precursor (EC 3.2.1.-)
fig|6666666.293769.peg.633	188.194	-0.585111	0.287599	-2.03447	0.0419045	0.171339	Cell Wall and Capsule	- none -	- none -	Tetraacyldisaccharide 4&#39;-kinase (EC 2.7.1.130)
fig|6666666.293769.peg.3469	7727.22	0.896413	0.445223	2.0134	0.0440725	0.177059	Cell Wall and Capsule	- none -	- none -	UDP-3-O-[3-hydroxymyristoyl] N-acetylglucosamine deacetylase (EC 3.5.1.108)
fig|6666666.293769.peg.2578	277.228	0.785582	0.395759	1.985	0.0471442	0.183809	Cell Wall and Capsule	- none -	- none -	putative membrane protein
fig|6666666.293769.peg.2195	186.259	-1.01315	0.516832	-1.96031	0.0499593	0.189938	Cell Wall and Capsule	- none -	- none -	Membrane-bound lytic murein transglycosylase B
fig|6666666.293769.peg.4208	21.6796	1.88158	0.984314	1.91157	0.0559317	0.203408	Cell Wall and Capsule	- none -	- none -	Putative inner membrane protein, DUF1819 superfamily
fig|6666666.293769.peg.212	726.068	0.802254	0.420232	1.90908	0.0562523	0.203728	Cell Wall and Capsule	Cell Wall and Capsule - no subcategory	Recycling of Peptidoglycan Amino Acids	N-acetylmuramoyl-L-alanine amidase (EC 3.5.1.28)
fig|6666666.293769.peg.70	325.86	0.510767	0.27292	1.87149	0.0612779	0.213865	Cell Wall and Capsule	- none -	- none -	Outer membrane protein assembly factor YaeT
fig|6666666.293769.peg.1985	671.653	-0.466492	0.25149	-1.85491	0.063609	0.217987	Cell Wall and Capsule	- none -	- none -	Multimodular transpeptidase-transglycosylase (EC 2.4.1.129) (EC 3.4.-.-)
fig|6666666.293769.peg.1177	227.427	-0.567031	0.30691	-1.84755	0.064668	0.220315	Cell Wall and Capsule	- none -	- none -	UDP-N-acetylglucosamine--N-acetylmuramyl-(pentapeptide) pyrophosphoryl-undecaprenol N-acetylglucosamine transferase (EC 2.4.1.227)
fig|6666666.293769.peg.1212	503.871	-0.495019	0.270826	-1.82781	0.0675778	0.226324	Cell Wall and Capsule	- none -	- none -	Phosphatidylglycerol--membrane-oligosaccharide glycerophosphotransferase (EC 2.7.8.20)
fig|6666666.293769.peg.2674	104.412	-1.1429	0.630424	-1.81291	0.0698461	0.229744	Cell Wall and Capsule	- none -	- none -	Rod shape-determining protein MreC
fig|6666666.293769.peg.548	501.671	-0.536709	0.300089	-1.7885	0.0736956	0.237113	Cell Wall and Capsule	- none -	- none -	UDP-N-acetylmuramoylalanyl-D-glutamate--2,6-diaminopimelate ligase (EC 6.3.2.13)
fig|6666666.293769.peg.270	161.612	-0.69187	0.39036	-1.77239	0.0763296	0.241995	Cell Wall and Capsule	- none -	- none -	Murein hydrolase activator EnvC
fig|6666666.293769.peg.1926	132.06	0.753094	0.450547	1.67151	0.0946214	0.279092	Cell Wall and Capsule	- none -	- none -	3-deoxy-manno-octulosonate cytidylyltransferase (EC 2.7.7.38)
fig|6666666.293769.peg.1127	354.593	-0.320922	0.199731	-1.60677	0.108105	0.301482	Cell Wall and Capsule	- none -	- none -	Carbamoyltransferase in large core OS assembly cluster
fig|6666666.293769.peg.4184	158.523	-0.459023	0.286436	-1.60253	0.109038	0.302809	Cell Wall and Capsule	- none -	- none -	Murein-DD-endopeptidase (EC 3.4.99.-)
fig|6666666.293769.peg.1257	115.708	-0.513906	0.323787	-1.58717	0.112473	0.309043	Cell Wall and Capsule	- none -	- none -	Lipid A export permease/ATP-binding protein MsbA
fig|6666666.293769.peg.2553	7.3037	-1.42472	0.912848	-1.56074	0.118585	0.319115	Cell Wall and Capsule	- none -	- none -	Uncharacterized membrane protein YCR061W
fig|6666666.293769.peg.74	273.929	-0.372493	0.244024	-1.52646	0.126895	0.333275	Cell Wall and Capsule	- none -	- none -	Acyl-[acyl-carrier-protein]--UDP-N-acetylglucosamine O-acyltransferase (EC 2.3.1.129)
fig|6666666.293769.peg.1492	34.2314	-0.779597	0.523764	-1.48845	0.136632	0.348206	Cell Wall and Capsule	- none -	- none -	1,6-anhydro-N-acetylmuramyl-L-alanine amidase
fig|6666666.293769.peg.3284	24.7043	-1.03614	0.698697	-1.48296	0.138085	0.348986	Cell Wall and Capsule	- none -	- none -	Protein QmcA (possibly involved in integral membrane quality control)
fig|6666666.293769.peg.1407	194.859	-0.505389	0.34751	-1.45432	0.145859	0.359187	Cell Wall and Capsule	- none -	- none -	Multimodular transpeptidase-transglycosylase (EC 2.4.1.129) (EC 3.4.-.-)
fig|6666666.293769.peg.1727	96.8801	-0.539341	0.371109	-1.45332	0.146134	0.359369	Cell Wall and Capsule	- none -	- none -	CDP-diacylglycerol--serine O-phosphatidyltransferase (EC 2.7.8.8)
fig|6666666.293769.peg.1568	228.578	0.449912	0.309794	1.45229	0.146421	0.359369	Cell Wall and Capsule	Cell Wall and Capsule - no subcategory	UDP-N-acetylmuramate from Fructose-6-phosphate Biosynthesis	N-acetylglucosamine-1-phosphate uridyltransferase (EC 2.7.7.23)
fig|6666666.293769.peg.75	175.395	-0.559463	0.40259	-1.38966	0.164632	0.387881	Cell Wall and Capsule	- none -	- none -	Lipid-A-disaccharide synthase (EC 2.4.1.182)
fig|6666666.293769.peg.1123	60.7778	-0.912005	0.672824	-1.35549	0.175262	0.403291	Cell Wall and Capsule	- none -	- none -	Outer-membrane-phospholipid-binding lipoprotein MlaA
fig|6666666.293769.peg.305	211.601	-0.537121	0.400284	-1.34185	0.179645	0.408778	Cell Wall and Capsule	- none -	- none -	Colicin V production protein
fig|6666666.293769.peg.1927	144.032	0.470292	0.352979	1.33235	0.182744	0.41404	Cell Wall and Capsule	- none -	- none -	3-deoxy-D-manno-octulosonate 8-phosphate phosphatase (EC 3.1.3.45)
fig|6666666.293769.peg.1256	346.611	-0.737553	0.564114	-1.30745	0.191059	0.424615	Cell Wall and Capsule	- none -	- none -	Lipid A biosynthesis lauroyl acyltransferase (EC 2.3.1.241)
fig|6666666.293769.peg.817	505.396	1.05422	0.813932	1.29522	0.195243	0.429162	Cell Wall and Capsule	- none -	- none -	Putative transmembrane protein
fig|6666666.293769.peg.1721	119.98	0.352434	0.284492	1.23882	0.215412	0.455998	Cell Wall and Capsule	Gram-Negative cell wall components	Peptidoglycan lipid II flippase	Proposed peptidoglycan lipid II flippase MurJ
fig|6666666.293769.peg.518	299.876	-0.465113	0.376543	-1.23522	0.216748	0.457856	Cell Wall and Capsule	- none -	- none -	Colanic acid biosynthesis glycosyl transferase WcaE
fig|6666666.293769.peg.1780	247.262	0.367357	0.302064	1.21615	0.223926	0.467126	Cell Wall and Capsule	- none -	- none -	Prolipoprotein diacylglyceryl transferase
fig|6666666.293769.peg.338	5.06394	1.69872	1.40812	1.20638	0.227672	0.472798	Cell Wall and Capsule	- none -	- none -	Rod shape determination protein
fig|6666666.293769.peg.2813	229.526	-0.695542	0.591084	-1.17672	0.239306	0.485826	Cell Wall and Capsule	- none -	- none -	Putative transmembrane protein
fig|6666666.293769.peg.1370	248.252	-0.371601	0.316633	-1.1736	0.240555	0.487381	Cell Wall and Capsule	- none -	- none -	Lipopolysaccharide assembly protein LapB
fig|6666666.293769.peg.1750	46.5864	0.616999	0.532909	1.15779	0.246948	0.494452	Cell Wall and Capsule	- none -	- none -	Uncharacterized membrane protein, YraQ family
fig|6666666.293769.peg.82	243.466	-0.28291	0.254223	-1.11284	0.265777	0.518055	Cell Wall and Capsule	- none -	- none -	2-Keto-3-deoxy-D-manno-octulosonate-8-phosphate synthase (EC 2.5.1.55)
fig|6666666.293769.peg.566	148.778	0.314761	0.283104	1.11182	0.266215	0.518359	Cell Wall and Capsule	- none -	- none -	Anhydro-N-acetylmuramic acid kinase (EC 2.7.1.170)
fig|6666666.293769.peg.1400	69.5287	0.562991	0.515058	1.09306	0.274366	0.526324	Cell Wall and Capsule	- none -	- none -	Inner membrane protein YedI
fig|6666666.293769.peg.2956	155.276	-0.547983	0.504646	-1.08588	0.277534	0.528083	Cell Wall and Capsule	- none -	- none -	putative lipoprotein
fig|6666666.293769.peg.72	253.777	-0.291025	0.269004	-1.08186	0.279314	0.530135	Cell Wall and Capsule	- none -	- none -	UDP-3-O-[3-hydroxymyristoyl] glucosamine N-acyltransferase (EC 2.3.1.191)
fig|6666666.293769.peg.1972	390.417	-0.272061	0.25229	-1.07837	0.28087	0.531438	Cell Wall and Capsule	Cell Wall and Capsule - no subcategory	UDP-N-acetylmuramate from Fructose-6-phosphate Biosynthesis	UDP-N-acetylglucosamine 1-carboxyvinyltransferase (EC 2.5.1.7)
fig|6666666.293769.peg.2193	279.478	-0.487927	0.464837	-1.04967	0.293869	0.545013	Cell Wall and Capsule	- none -	- none -	Peptidoglycan D,D-transpeptidase MrdA (EC 3.4.16.4)
fig|6666666.293769.peg.1925	366.105	0.260879	0.255205	1.02223	0.30667	0.559293	Cell Wall and Capsule	- none -	- none -	D-arabinose 5-phosphate isomerase (EC 5.3.1.13)
fig|6666666.293769.peg.1254	286.31	-0.299213	0.294899	-1.01463	0.310283	0.562263	Cell Wall and Capsule	- none -	- none -	Lipid A biosynthesis lauroyl acyltransferase (EC 2.3.1.241)
fig|6666666.293769.peg.1646	23.9376	-0.513766	0.513237	-1.00103	0.316812	0.570447	Cell Wall and Capsule	- none -	- none -	Cardiolipin synthase (EC 2.7.8.-), ClsA
fig|6666666.293769.peg.1179	411.041	-0.296132	0.307211	-0.963936	0.335078	0.590635	Cell Wall and Capsule	- none -	- none -	UDP-N-acetylenolpyruvoylglucosamine reductase (EC 1.3.1.98)
fig|6666666.293769.peg.1691	234.045	-0.394917	0.416548	-0.948069	0.343094	0.59859	Cell Wall and Capsule	- none -	- none -	Membrane protein insertion efficiency factor YidD
fig|6666666.293769.peg.523	167.196	-0.274256	0.289321	-0.947929	0.343166	0.59859	Cell Wall and Capsule	- none -	- none -	Undecaprenyl-phosphate alpha-N-acetylglucosaminyl 1-phosphate transferase (EC 2.7.8.33)
fig|6666666.293769.peg.138	863.579	-0.460564	0.486418	-0.946848	0.343716	0.598983	Cell Wall and Capsule	Cell Wall and Capsule - no subcategory	UDP-N-acetylmuramate from Fructose-6-phosphate Biosynthesis	Phosphoglucosamine mutase (EC 5.4.2.10)
fig|6666666.293769.peg.1354	215.631	-0.224942	0.238369	-0.943671	0.345338	0.600585	Cell Wall and Capsule	- none -	- none -	putative membrane protein
fig|6666666.293769.peg.1022	79.6235	0.361143	0.38279	0.94345	0.345451	0.600585	Cell Wall and Capsule	- none -	- none -	Membrane protein
fig|6666666.293769.peg.1618	53.5768	0.330987	0.378756	0.873881	0.382183	0.636799	Cell Wall and Capsule	Capsular and extracellular polysacchrides	Rhamnose containing glycans	dTDP-glucose 4,6-dehydratase (EC 4.2.1.46)
fig|6666666.293769.peg.634	76.2599	-0.554276	0.666523	-0.831593	0.405639	0.65285	Cell Wall and Capsule	Miscellaneous - no subcategory	Broadly distributed proteins not in subsystems	FIG002473: Protein YcaR in KDO2-Lipid A biosynthesis cluster
[truncated: 3,415 more rows]

## Sheet: A_strummeri_Sulfide
FeatureID	baseMean	log2FoldChange	lfcSE	stat	pvalue	padj	Category	Subcategory	Subsystem	Function
[truncated: 3,613 more rows]

[truncated: 3 more sheets: A_strummeri_Hydrogen, A_boucheti_Sulfide, A_boucheti_Hydrogen]
